# Supplementary material
Source: PubMed Central journal article supplement (PMC3736323)
Supplement: NIHMS52906-supplement-supporting_material.pdf [file NIHMS52906-supplement-supporting_material.pdf]

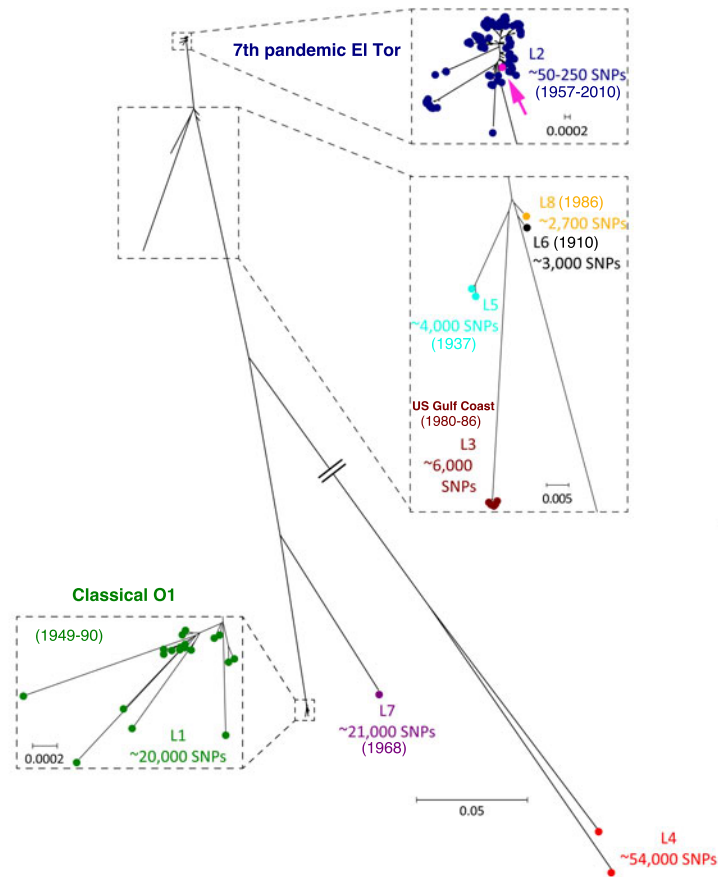

**Fig S1** A maximum likelihood phylogenetic tree of *V. cholerae* based on the SNP differences within the core genome. The 6 major O1 clinical groups are L1 - L6 with L2 being the 7<sup>th</sup> pandemic El Tor and L1 representing the classical lineage. L7 and L8 are formed solely by V52 and BX3300286 respectively. The numbers of SNP differences indicated are relative to the reference N16961 El Tor strain in L2, marked by the bright pink arrow, and in brackets is the information about the date range covered in our strain collection. The scale is given as the number of substitutions per variable site.

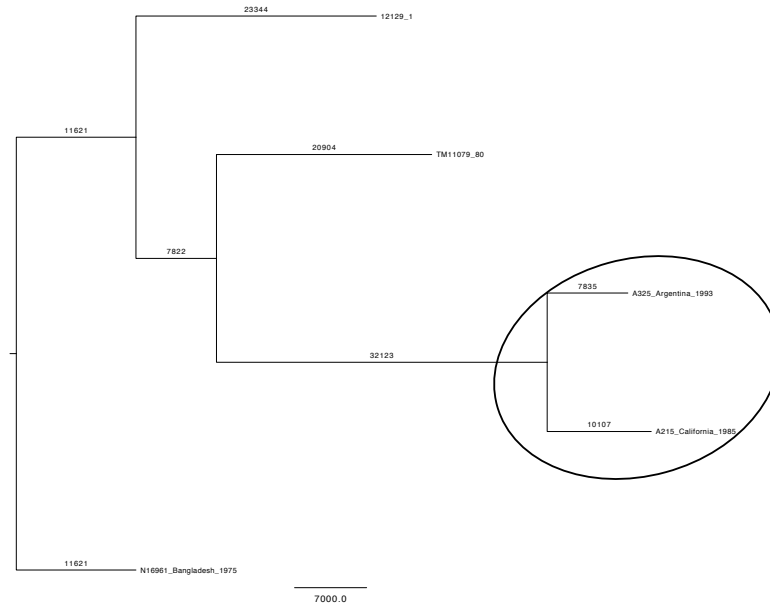

**Fig S2** Comparison of the Non-conventional strains in our collection (clinical) with those from Chun *et al* (environmental). The two clinical Non-Conventional O1 strains are circled, which although they share common ancestor with TM11079\_80, are different from their environmental counterparts by ~40,000 SNPs and form a separate lineage. The tree is rooted using N16961 reference El Tor strain and the scale bar indicates the number of SNPs differences against it.

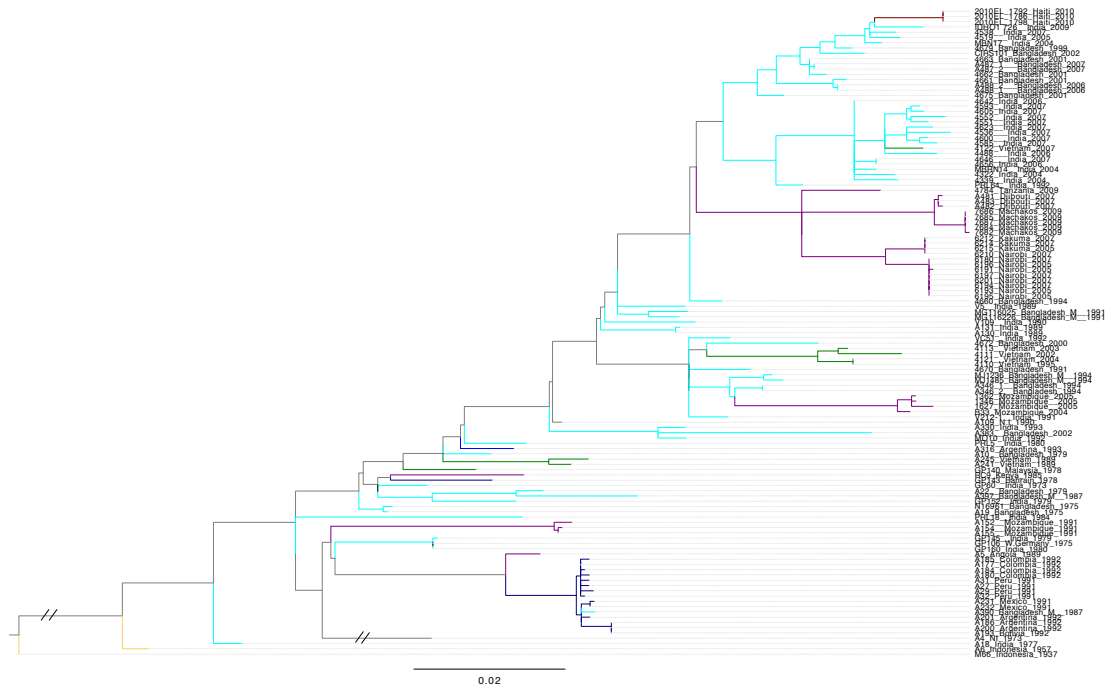

**Fig S3** The maximum likelihood phylogenetic tree of the 7<sup>th</sup> pandemic lineage of *V. cholerae* based on the SNP differences across the whole core genome, excluding likely recombination events. The pre-7<sup>th</sup> pandemic isolate M66 was used as an outgroup to root the tree. Branches are colored based on the region of isolation of the strains and the names of taxa include metadata about their isolation place and year. The scale is given as the number of substitutions per variable site.

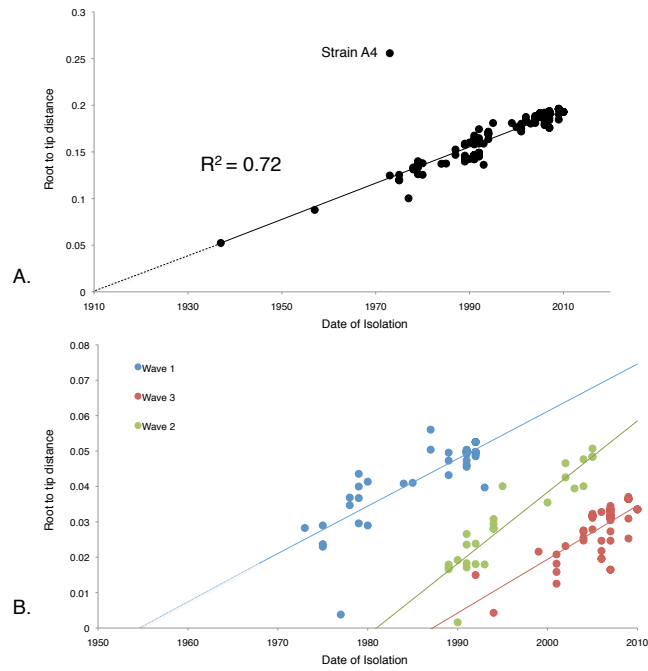

**Fig S4** A) Linear regression plot of the 7<sup>th</sup> pandemic strains showing the correlation ( $R^2$ ) between the root-to-tip distance (y-axis) and the date of isolation (x-axis). B) Plot of root-to-tip distance for each wave considered separately. Laboratory strain A4, a clear outlier in the 7<sup>th</sup> pandemic analysis, was not taken into account in the separate wave 1 analysis.

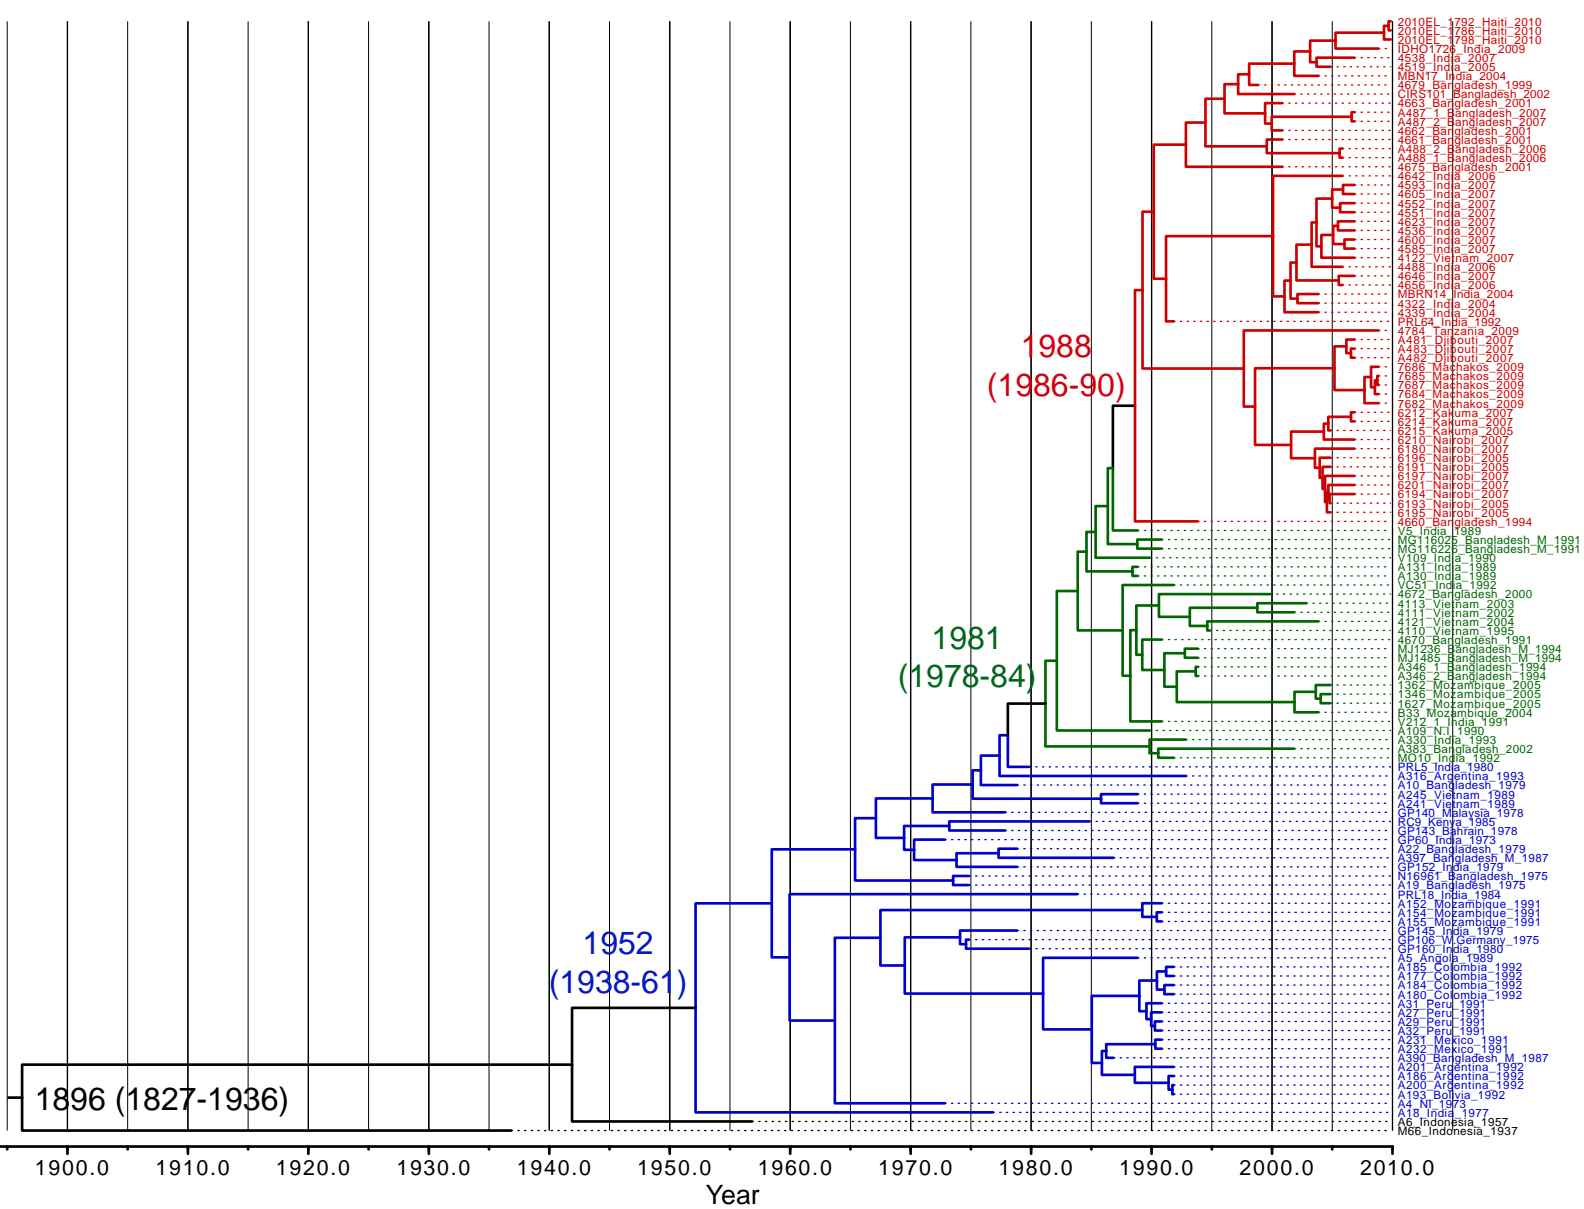

**Fig S5** Maximum clade credibility tree generated by the BEAST analysis of 7th cholera pandemic. Node heights are the median values obtained from the BEAST analysis. Highlighted dates are the median values predicted by BEAST with the date range provided representing the 95% confidence interval on the estimate. The dates shown are for the MRCAs of the El Tor lineage, wave 1, SXT acquisition, wave 2 and wave 3.

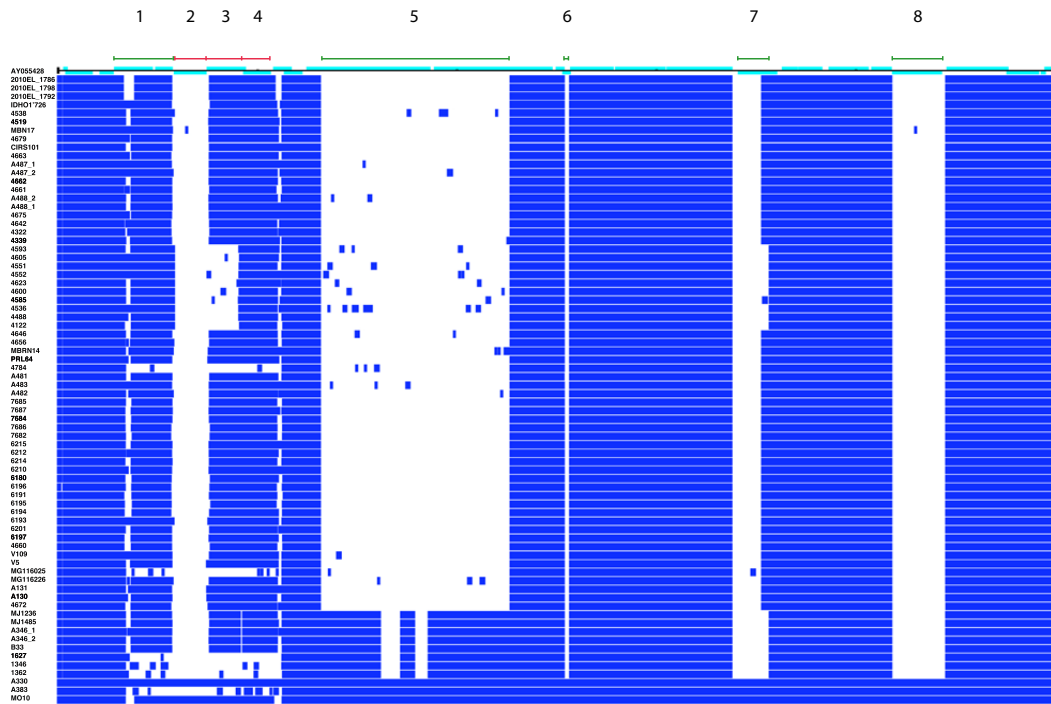

**Fig S6** Plots showing presence (blue) or absence (white) information of the genes of SXT of O139 strain MO10 (accession number AY055428) in all the 7<sup>th</sup> pandemic strains possessing SXT/R391 ICE insertion in their *prfC* gene. The regions marked by green bars are variable and those marked with red bars are variable and encode antibiotic resistance (2, Trimethoprim; 3, Floramphenicol; and 4, Streptomycin and Sulfonamide). Regions numerically marked are (as in Genbank): *tnp* - *tnpB* (1), *dhfR18* - *dcd* (2), ‘*tnpB* - *tnpB*’ (3), *strB* - *sulIII* (4), *s026* - *s040* (5), *s044* - *s045* (6), *s060* - *s062* (7) and CDS - CDS (8).

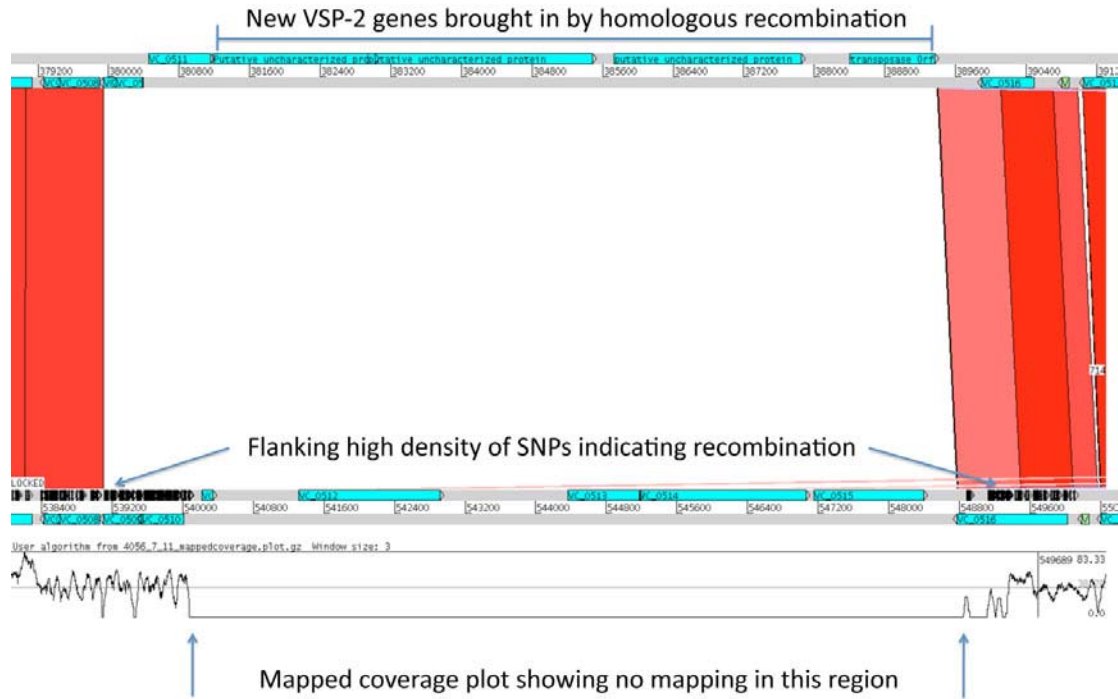

**Fig S7** ACT picture showing recombination in WASA cluster. The genomes compared are A193 (top) and N16961 (bottom) where A193 represents the WASA cluster. High SNP density flanking the region replaced with new genes indicates the likely recombination event.

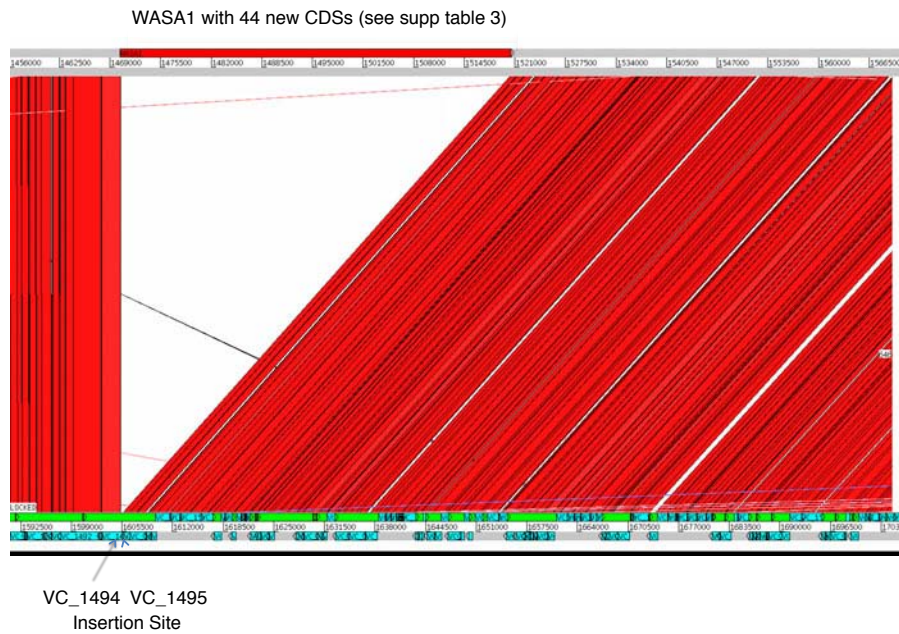

**Fig S8** ACT picture showing insertion of WASA 1 within VC\_1494 (product, aminopeptidase N). The genomes compared are A193 (top) and N16961 (bottom) and the insertion was present in all the WASA strains in our collection.



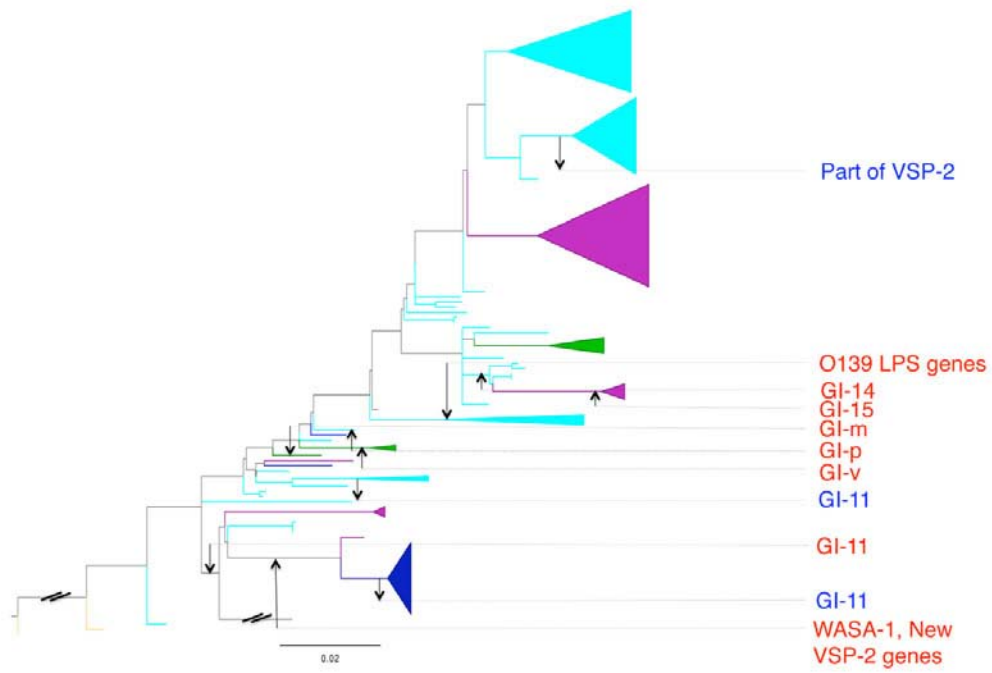

**Fig S9** The maximum likelihood tree for 7<sup>th</sup> pandemic strains with the gene flux plotted on the branches. Genomic Islands colored red are the insertions and those colored blue denote the deletions. The details of the genes carried on these genomic islands or region of differences are in the supplementary table S3.

Table S1. Strains used in this study. The colours indicate the lineage (L1-L8) they belong to, as shown in Fig S1.

| Strain Name | Isolation place | Isolation Year | Serotype | Original ID | Accession Number |
|-------------|-----------------|----------------|----------|-------------|------------------|
| A330        | India           | 1993           | O139     | A330        | ERS013124        |
| A383        | Bangladesh      | 2002           | O139     | A383        | ERS013125        |
| A488(2)     | Bangladesh      | 2006           | Ogawa    | A488        | ERS013129        |
| V5          | India           | 1989           | Ogawa    | V5          | ERS013130        |
| V109        | India           | 1990           | Ogawa    | V109        | ERS013131        |
| V212-1      | India           | 1991           | Ogawa    | V212-1      | ERS013132        |
| VC51        | India           | 1992           | Ogawa    | VC51        | ERS013133        |
| MBN17       | India           | 2004           | Inaba    | MBN17       | ERS013134        |
| MG116025    | Bangladesh(M)   | 1991           | Ogawa    | MG116025    | ERS013135        |
| MJ1485      | Bangladesh(M)   | 1994           | Inaba    | MJ1485      | ERS013126        |
| MBRN14      | India           | 2004           | Ogawa    | MBRN14      | ERS013127        |
| GP8         | India           | 1970           | Inaba    | GP8         | ERS013128        |
| GP16        | India           | 1971           | Inaba    | GP16        | ERS013136        |
| GP60        | India           | 1973           | Ogawa    | GP60        | ERS013137        |
| GP106       | W.Germany       | 1975           | Ogawa    | GP106       | ERS013140        |
| GP140       | Malaysia        | 1978           | Ogawa    | GP140       | ERS013141        |
| GP143       | Bahrain         | 1978           | Inaba    | GP143       | ERS013142        |
| GP145       | India           | 1979           | Inaba    | GP145       | ERS013143        |
| PRL5        | India           | 1980           | Ogawa    | PRL5        | ERS013145        |
| GP152       | India           | 1979           | Inaba    | GP152       | ERS013146        |
| IDHO1'726   | India           | 2009           | Ogawa    | IDHO1'726   | ERS013147        |
| PRL18       | India           | 1984           | Ogawa    | PRL18       | ERS013138        |
| PRL64       | India           | 1992           | Ogawa    | PRL64       | ERS013139        |
| A46         | N.I             | 1964           | Ogawa    | A46         | ERS013160        |
| A49         | N.I             | 1962           | Inaba    | A49         | ERS013161        |
| A50         | Bangladesh      | 1963           | Ogawa    | A50         | ERS013164        |
| A51         | Egypt           | 1949           | Ogawa    | Cairo 50    | ERS013165        |
| A57         | India           | 1980           | Ogawa    | U10198      | ERS013166        |
| A59         | India           | 1970           | Inaba    | A59         | ERS013167        |
| A60         | Thailand        | 1958           | Inaba    | A60         | ERS013168        |
| A61         | India           | 1970           | Inaba    | A61         | ERS013169        |
| A66         | Bangladesh      | 1962           | Inaba    | A66         | ERS013170        |
| A68         | Egypt           | 1949           | Inaba    | Cairo 48    | ERS013171        |
| A70         | Bangladesh      | 1969           | Inaba    | G28190      | ERS013162        |
| A76         | Bangladesh      | 1982           | Inaba    | X19850      | ERS013163        |
| A103        | N.I             | 1990           | Inaba    | V584        | ERS013172        |
| A109        | N.I             | 1990           | Ogawa    | V588        | ERS013173        |
| A111        | N.I             | 1990           | Inaba    | V591        | ERS013176        |
| A130        | India           | 1989           | Ogawa    | IDH-11      | ERS013177        |
| A131        | India           | 1989           | Ogawa    | IDH-12      | ERS013178        |
| A152        | Mozambique      | 1991           | Ogawa    | VC1         | ERS013179        |
| A154        | Mozambique      | 1991           | Ogawa    | VC3         | ERS013180        |
| A155        | Mozambique      | 1991           | Inaba    | VC3 no hem  | ERS013181        |
| A177        | Colombia        | 1992           | Inaba    | 602         | ERS013182        |
| A180        | Colombia        | 1992           | Inaba    | 1388        | ERS013183        |
| A184        | Colombia        | 1992           | Ogawa    | 6216        | ERS013174        |
| A185        | Colombia        | 1992           | Ogawa    | 6216 no hem | ERS013175        |
| A186        | Argentina       | 1992           | Ogawa    | S122        | ERS013184        |
| A193        | Bolivia         | 1992           | Ogawa    | S132        | ERS013185        |
| A200        | Argentina       | 1992           | Ogawa    | F14         | ERS013188        |
| A201        | Argentina       | 1992           | Inaba    | BsAs110     | ERS013189        |
| A209        | Florida         | 1980           | Inaba    | 2741-80     | ERS013190        |
| A213        | Georgia         | 1984           | Inaba    | 0917-84     | ERS013191        |
| A215        | California      | 1985           | Inaba    | 2483-85     | ERS013192        |
| A217        | Louisiana       | 1986           | Inaba    | 2469-86     | ERS013193        |
| A219        | Georgia         | 1986           | Inaba    | 2538-86     | ERS013194        |
| A231        | Mexico          | 1991           | Inaba    | VC21R       | ERS013195        |
| A232        | Mexico          | 1991           | Inaba    | VC22S       | ERS013186        |
| A241        | Vietnam         | 1989           | Inaba    | 43/89       | ERS013187        |
| A245        | Vietnam         | 1989           | Ogawa    | 148/89      | ERS013196        |
| A279        | Sweden          | 1990           | Inaba    | K216/92     | ERS013197        |
| A316        | Argentina       | 1993           | Ogawa    | SO1419      | ERS013200        |
| A325        | Argentina       | 1993           | Inaba    | B1/W        | ERS013201        |
| A346(2)     | Bangladesh      | 1994           | Ogawa    | A346        | ERS013202        |
| A389        | Bangladesh(M)   | 1987           | Inaba    | VM11647     | ERS013203        |
| A390        | Bangladesh(M)   | 1987           | Ogawa    | VM12229     | ERS013204        |

|         |               |      |       |            |           |
|---------|---------------|------|-------|------------|-----------|
| A397    | Bangladesh(M) | 1987 | Ogawa | VM14169    | ERS013205 |
| A481    | Djibouti      | 2007 | Inaba | 1          | ERS013206 |
| A482    | Djibouti      | 2007 | Inaba | 2          | ERS013207 |
| A483    | Djibouti      | 2007 | Inaba | 3          | ERS013198 |
| A487(2) | Bangladesh    | 2007 | Inaba | A487       | ERS013199 |
| 4110    | Vietnam       | 1995 | Inaba | IB4110     | ERS013252 |
| 4111    | Vietnam       | 2002 | Inaba | IB4111     | ERS013253 |
| 4322    | India         | 2004 | Inaba | IB4322     | ERS013254 |
| 4642    | India         | 2006 | Inaba | IB4642     | ERS013255 |
| 4670    | Bangladesh    | 1991 | Inaba | MG116926   | ERS013256 |
| 4672    | Bangladesh    | 2000 | Ogawa | E1781      | ERS016137 |
| 4122    | Vietnam       | 2007 | Ogawa | IB4122     | ERS013264 |
| 4605    | India         | 2007 | Ogawa | IB4605     | ERS013257 |
| 4656    | India         | 2006 | Ogawa | IB4656     | ERS013258 |
| 4675    | Bangladesh    | 2001 | Ogawa | E1978      | ERS013259 |
| 4679    | Bangladesh    | 1999 | Ogawa | AR-32732   | ERS013260 |
| 4663    | Bangladesh    | 2001 | Ogawa | MQ1273     | ERS013261 |
| 4661    | Bangladesh    | 2001 | Ogawa | MQ4        | ERS013263 |
| 4660    | Bangladesh    | 1994 | Ogawa | VC073      | ERS013262 |
| 6180    | Nairobi       | 2007 | Inaba | 6180       | ERS013208 |
| 6210    | Nairobi       | 2007 | Inaba | 6210       | ERS013218 |
| 6201    | Nairobi       | 2007 | Inaba | 6201       | ERS013217 |
| 6197    | Nairobi       | 2007 | Inaba | 6197       | ERS013216 |
| 6196    | Nairobi       | 2005 | Inaba | 6196       | ERS013215 |
| 6195    | Nairobi       | 2005 | Inaba | 6195       | ERS013214 |
| 6194    | Nairobi       | 2007 | Inaba | 6194       | ERS013213 |
| 6193    | Nairobi       | 2005 | Inaba | 6193       | ERS013212 |
| 6215    | Kakuma        | 2005 | Inaba | 6215       | ERS013211 |
| 6214    | Kakuma        | 2007 | Inaba | 6214       | ERS013210 |
| 6191    | Nairobi       | 2005 | Inaba | 6191       | ERS013209 |
| 6212    | Kakuma        | 2007 | Inaba | 6212       | ERS013219 |
| 7682    | Machakos      | 2009 | Inaba | 7682       | ERS013220 |
| 7687    | Machakos      | 2009 | Inaba | 7687       | ERS013226 |
| 7686    | Machakos      | 2009 | Inaba | 7686       | ERS013225 |
| 7685    | Machakos      | 2009 | Inaba | 7685       | ERS013224 |
| 7684    | Machakos      | 2009 | Inaba | 7684       | ERS013221 |
| 1346    | Mozambique    | 2005 | Inaba | IB1346     | ERS013265 |
| 4551    | India         | 2007 | Ogawa | IB4551     | ERS013266 |
| 4623    | India         | 2007 | Ogawa | IB4623     | ERS013267 |
| 4593    | India         | 2007 | Ogawa | IB4593     | ERS013268 |
| 4538    | India         | 2007 | Inaba | IB4538     | ERS013269 |
| 4339    | India         | 2004 | Ogawa | IB4339     | ERS013270 |
| 4121    | Vietnam       | 2004 | Ogawa | IB4121     | ERS013271 |
| 4113    | Vietnam       | 2003 | Inaba | IB4113     | ERS013273 |
| 4585    | India         | 2007 | Ogawa | IB4585     | ERS013232 |
| 4552    | India         | 2007 | Ogawa | IB4552     | ERS013233 |
| 4488    | India         | 2006 | Ogawa | IB4488     | ERS013234 |
| 4784    | Tanzania      | 2009 | Ogawa | IB4784     | ERS013235 |
| 4600    | India         | 2007 | Ogawa | IB4600     | ERS013236 |
| 4646    | India         | 2007 | Ogawa | IB4646     | ERS013237 |
| 4662    | Bangladesh    | 2001 | Ogawa | IB4662     | ERS013238 |
| 4519    | India         | 2005 | Ogawa | IB4519     | ERS013239 |
| 4536    | India         | 2007 | Ogawa | IB4536     | ERS013240 |
| 1362    | Mozambique    | 2005 | Ogawa | IB1362     | ERS013241 |
| 1627    | Mozambique    | 2005 | Ogawa | IB1627     | ERS013242 |
| GP160   | India         | 1980 | Ogawa | GP160      | ERS013243 |
| A4      | N.I           | 1973 | Inaba | 1824       | ERS013244 |
| A5      | Angola        | 1989 | Inaba | SBL        | ERS013245 |
| A6      | Indonesia     | 1957 | Inaba | C5         | ERS013246 |
| A10     | Bangladesh    | 1979 | Ogawa | T20567     | ERS013247 |
| A18     | India         | 1977 | Inaba | Phil6973   | ERS013248 |
| A19     | Bangladesh    | 1971 | Inaba | N16961     | ERS013249 |
| A22     | Bangladesh    | 1979 | Inaba | T19479     | ERS013250 |
| A27     | Peru          | 1991 | Inaba | 174        | ERS013251 |
| A29     | Peru          | 1991 | Inaba | 175        | ERS013274 |
| A31     | Peru          | 1991 | Inaba | 176        | ERS013275 |
| A32     | Peru          | 1991 | Inaba | 176 no hem | ERS013276 |

|               |                 |       |       |               |                   |
|---------------|-----------------|-------|-------|---------------|-------------------|
| A346(1)       | Bangladesh      | 1994  | Ogawa | A346          | ERS013278         |
| A488(1)       | Bangladesh      | 2006  | Ogawa | A488          | ERS013279         |
| A487(1)       | Bangladesh      | 2007  | Inaba | A487          | ERS013281         |
| MG116226      | Bangladesh(M)   | 1991  | Ogawa | MG116226      | ERS013282         |
| A215          | California      | 1985  | Inaba | 2483-85       | ERS013277         |
| A325          | Argentina       | 1993  | Inaba | B1/W          | ERS013280         |
| N16961        | Bangladesh      | 1975* | Inaba | N16961        | AE003852/AE003853 |
| M66           | Indonesia       | 1937  | N.I   | M66           | CP001233/CP001234 |
| 2010EL_1786   | Haiti           | 2010  | Ogawa | 2010EL_1786   | AELH00000000.1    |
| 2010EL_1792   | Haiti           | 2010  | Ogawa | 2010EL_1792   | AELJ00000000.1    |
| 2010EL_1798   | Haiti           | 2010  | Ogawa | 2010EL_1798   | AELI00000000.1    |
| B33           | Mozambique      | 2004  | Ogawa | B33           | ACHZ00000000      |
| CIRS101       | Bangladesh      | 2002  | Inaba | CIRS101       | ACVW00000000      |
| MJ1236        | Bangladesh(M)   | 1994  | Inaba | MJ1236        | CP001485/CP001486 |
| MO10          | India           | 1992  | O139  | MO10          | AAKF03000000      |
| RC9           | Kenya           | 1985  | Ogawa | RC9           | ACHX00000000      |
| BX330286      | Australia       | 1986  | Inaba | BX330286      | ACIA00000000      |
| MAK757        | Celebes_Islands | 1937  | Ogawa | MAK757        | AAUS00000000      |
| NCTC_8457     | Saudi_Arabia    | 1910  | Inaba | NCTC_8457     | AAWD01000000      |
| V52(O37)      | Sudan           | 1968  | O37   | V52(O37)      | AAKJ02000000      |
| 2740_80       | USGulfCoast     | 1980  | Inaba | 2740_80       | AAUT01000000      |
| O395_Combined | India           | 1965  | Ogawa | O395_Combined | CP000626/CP000627 |
| 12129_1       | Australia       | 1985  | Inaba | 12129         | ACFQ00000000      |
| TM11079-80    | Brazil          | 1980  | Ogawa | TM11079-80    | ACHW00000000      |

\*incorrectly assigned 1971 in all previous publications, corrected in our manuscript to 1975 after a record check by G Balakrish Nair

NI = No Information  
(M) = Matlab

Table S2. 7th Pandemic strains coloured according to their membership of each of the waves (wave 1, 2 or 3). The CTX type and structure information for each strain is also given.

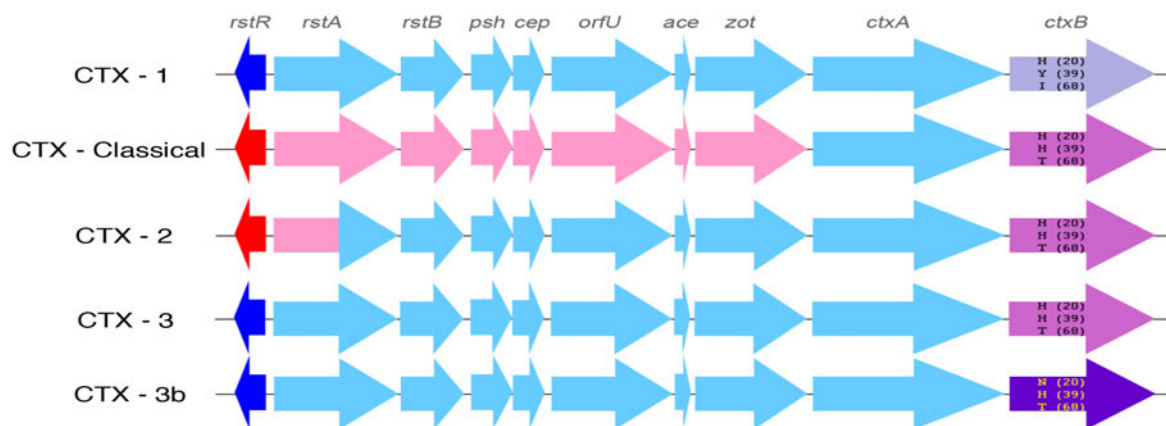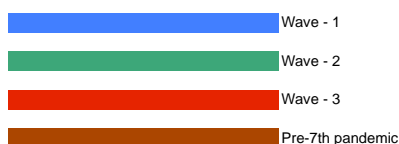

| Strain Name                | Chr 1 CTX structure         | Chr 2 CTX structure | Note                                                           |
|----------------------------|-----------------------------|---------------------|----------------------------------------------------------------|
| 2010EL_1792_Haiti_2010     | TLC-RS1-CTX-3               | Blank               |                                                                |
| 2010EL_1786_Haiti_2010     | TLC-RS1-CTX-3               | Blank               |                                                                |
| 2010EL_1798_Haiti_2010     | TLC-RS1-CTX-3               | Blank               |                                                                |
| IDHO1726_India_2009        | TLC-RS1-RS1-CTX-3           | Blank               |                                                                |
| 4538_India_2007            | TLC-RS1-CTX-3               | Blank               |                                                                |
| 4519_India_2005            | TLC-RS1-CTX-3               | Blank               |                                                                |
| MBN17_India_2004           | TLC-RS1-CTX-3               | Blank               |                                                                |
| 4679_Bangladesh_1999       | TLC-RS1-CTX-3               | Blank               |                                                                |
| CIRS101_Bangladesh_2002    | TLC-RS1-CTX-3               | Blank               |                                                                |
| 4663_Bangladesh_2001       | TLC-RS1-CTX-3               | Blank               |                                                                |
| A487_1_Bangladesh_2007     | TLC-RS1-CTX-3               | Blank               |                                                                |
| A487_2_Bangladesh_2007     | TLC-RS1-CTX-3               | Blank               |                                                                |
| 4662_Bangladesh_2001       | TLC-RS1-CTX-3               | Blank               |                                                                |
| 4661_Bangladesh_2001       | TLC-RS1-CTX-3               | Blank               |                                                                |
| A488_2_Bangladesh_2006     | TLC-RS1-CTX-3               | Blank               |                                                                |
| A488_1_Bangladesh_2006     | TLC-RS1-CTX-3               | Blank               |                                                                |
| 4675_Bangladesh_2001       | TLC-RS1-CTX-3               | Blank               |                                                                |
| 4642_India_2006            | TLC-RS1-CTX-3               | Blank               |                                                                |
| 4593_India_2007            | TLC-RS1-CTX-3               | Blank               | CTX-3b (A instead of C at nucleotide base position 58 in ctxB) |
| 4605_India_2007            | TLC-RS1-CTX-3               | Blank               | CTX-3b (A instead of C at nucleotide base position 58 in ctxB) |
| 4552_India_2007            | TLC-RS1-CTX-3               | Blank               |                                                                |
| 4551_India_2007            | TLC-RS1-CTX-3               | Blank               |                                                                |
| 4623_India_2007            | TLC-RS1-CTX-3               | Blank               |                                                                |
| 4536_India_2007            | TLC-RS1-CTX-3               | Blank               |                                                                |
| 4600_India_2007            | TLC-RS1-CTX-3               | Blank               |                                                                |
| 4585_India_2007            | TLC-RS1-CTX-3               | Blank               |                                                                |
| 4122_Vietnam_2007          | TLC-RS1-CTX-3               | Blank               |                                                                |
| 4488_India_2006            | TLC-RS1-CTX-3               | Blank               |                                                                |
| 4646_India_2007            | TLC-RS1-CTX-3               | Blank               |                                                                |
| 4656_India_2006            | TLC-RS1-CTX-3               | Blank               |                                                                |
| MBRN14_India_2004          | TLC-RS1-RS1-CTX-3           | Blank               | CTX-3b (A instead of C at nucleotide base position 58 in ctxB) |
| 4322_India_2004            | TLC-RS1-CTX-3               | Blank               |                                                                |
| 4339_India_2004            | TLC-RS1-CTX-3               | Blank               |                                                                |
| PRL64_India_1992           | TLC-RS1-RS1-CTX-3           | Blank               |                                                                |
| 4784_Tanzania_2009         | TLC-RS1-CTX-3               | Blank               |                                                                |
| A481_Djibouti_2007         | TLC-RS1-CTX-3               | Blank               |                                                                |
| A483_Djibouti_2007         | TLC-RS1-CTX-3               | Blank               |                                                                |
| A482_Djibouti_2007         | TLC-RS1-CTX-3               | Blank               |                                                                |
| 7686_Machakos_2009         | TLC-RS1-CTX-3               | Blank               |                                                                |
| 7685_Machakos_2009         | TLC-RS1-CTX-3               | Blank               |                                                                |
| 7687_Machakos_2009         | TLC-RS1-CTX-3               | Blank               |                                                                |
| 7684_Machakos_2009         | TLC-RS1-CTX-3               | Blank               |                                                                |
| 7682_Machakos_2009         | TLC-RS1-CTX-3               | Blank               |                                                                |
| 6212_Kakuma_2007           | TLC-RS1-CTX-3               | Blank               |                                                                |
| 6214_Kakuma_2007           | TLC-RS1-CTX-3               | Blank               |                                                                |
| 6215_Kakuma_2005           | TLC-RS1-CTX-3               | Blank               |                                                                |
| 6210_Nairobi_2007          | TLC-RS1-CTX-3               | Blank               |                                                                |
| 6180_Nairobi_2007          | TLC-RS1-CTX-3               | Blank               |                                                                |
| 6196_Nairobi_2005          | TLC-RS1-CTX-3               | Blank               |                                                                |
| 6191_Nairobi_2005          | TLC-RS1-CTX-3               | Blank               |                                                                |
| 6197_Nairobi_2007          | TLC-RS1-CTX-3               | Blank               |                                                                |
| 6201_Nairobi_2007          | TLC-RS1-CTX-3               | Blank               |                                                                |
| 6194_Nairobi_2007          | TLC-RS1-CTX-3               | Blank               |                                                                |
| 6193_Nairobi_2005          | TLC-RS1-CTX-3               | Blank               |                                                                |
| 6195_Nairobi_2005          | TLC-RS1-CTX-3               | Blank               |                                                                |
| 4660_Bangladesh_1994       | TLC-RS1-CTX-3               | Blank               |                                                                |
| V5_India_1989              | Blank                       | Blank               |                                                                |
| MG116025_Bangladesh_M_1991 | TLC-RS1-CTX-1-CTX-1-RS1-RS1 | Blank               |                                                                |
| MG116226_Bangladesh_M_1991 | TLC-RS1-CTX-1-CTX-1-RS1-RS1 | Blank               |                                                                |
| V109_India_1990            | TLC-RS1-CTX-3-CTX-3-RS1-RS1 | Blank               |                                                                |

|                          |                             |              |                                                    |
|--------------------------|-----------------------------|--------------|----------------------------------------------------|
| A131_India_1989          | TLC-RS1-RS1-CTX-1           | Blank        |                                                    |
| A130_India_1989          | TLC-RS1-RS1-CTX-1           | Blank        |                                                    |
| VC51_India_1992          | Blank                       | CTX-2        | 20bp deletion in rst A                             |
| 4672_Bangladesh_2000     | RS1-RS1                     | CTX-2-CTX-2  |                                                    |
| 4113_Vietnam_2003        | CTX-2                       | CTX-2-CTX-2  |                                                    |
| 4111_Vietnam_2002        | Blank                       | CTX-2-CTX-2  |                                                    |
| 4121_Vietnam_2004        | Blank                       | CTX-2-CTX-2  |                                                    |
| 4110_Vietnam_1995        | CTX-2                       | CTX-2-CTX-2  |                                                    |
| 4670_Bangladesh_1991     | TLC-RS1-RS1                 | CTX-2-CTX-2  |                                                    |
| MJ1236_Bangladesh_M_1994 | Blank                       | CTX-2-CTX-2  |                                                    |
| MJ1485_Bangladesh_M_1994 | Blank                       | CTX-2-CTX-2  |                                                    |
| A346_1_Bangladesh_1994   | TLC-RS1-RS1                 | CTX-2        |                                                    |
| A346_2_Bangladesh_1994   | TLC-RS1-RS1                 | CTX-2-CTX-2  |                                                    |
| 1362_Mozambique_2005     | Blank                       | CTX-2-CTX-2  |                                                    |
| 1346_Mozambique_2005     | TLC-RS1-CTX-2-RS1env-RS1env | CTX-2-CTX-2  |                                                    |
| 1627_Mozambique_2005     | CTX-2-RS1cla                | CTX-2-CTX-2  |                                                    |
| B33_Mozambique_2004      | Blank                       | CTX-2-CTX-2  |                                                    |
| V212-1_India_1991        | TLC-RS1-*-*-RS1-RS1         | CTX-2        | * = Could not be determined                        |
| A109_N.I_1990            | TLC-CTX-1-CTX-1-RS1         | Blank        |                                                    |
| A330_India_1993          | TLC-CTX-1                   | Blank        |                                                    |
| A383_Bangladesh_2002     | TLC-RS1-*                   | Blank        | * = Could not be determined                        |
| MO10_India_1992          | TLC-CTX-1-VSK               | Blank        | VSK is pre-CTX prophage (Chun <i>et al</i> , 2009) |
| PRL5_India_1980          | TLC-RS1-CTX-1-CTX-1-RS1-RS1 | Blank        |                                                    |
| A316_Argentina_e1991     | TLC-CTX-1-CTX-1-RS1         | Blank        |                                                    |
| A10_Bangladesh_1979      | TLC-RS1-CTX-1-CTX-1-RS1-RS1 | Blank        |                                                    |
| A245_Vietnam_1989        | TLC-RS1-CTX-1-CTX-1-RS1-RS1 | Blank        |                                                    |
| A241_Vietnam_1989        | TLC-RS1-CTX-1-CTX-1-RS1-RS1 | Blank        |                                                    |
| GP140_Malaysia_1978      | TLC-RS1-CTX-1-CTX-1-RS1-RS1 | Blank        |                                                    |
| RC9_Kenya_1985           | TLC-RS1-CTX-1-CTX-1-RS1-RS1 | ΔRS1-ΔCTX--1 |                                                    |
| GP143_Bahrain_1978       | TLC-RS1-RS1-CTX-1-CTX-1-RS1 | Blank        |                                                    |
| GP60_India_1973          | TLC-RS1-CTX-1-CTX-1-RS1     | Blank        |                                                    |
| A22_Bangladesh_1979      | *                           | Blank        | * = Could not be determined                        |
| A397_Bangladesh_M_e1991  | TLC-RS1-CTX-1-CTX-1-RS1     | Blank        |                                                    |
| GP152_India_1979         | RS1                         | Blank        |                                                    |
| N16961_Bangladesh_1975   | TLC-RS1-CTX-1-CTX-1-RS1-RS1 | *            |                                                    |
| A19_Bangladesh_1975      | TLC-CTX-1-RS1               | Blank        |                                                    |
| PRL18_India_1984         | TLC-CTX-1-RS1               | Blank        |                                                    |
| A152_Mozambique_1991     | TLC-RS1-RS1-CTX-1-CTX-1     | Blank        |                                                    |
| A154_Mozambique_1991     | TLC-RS1-CTX-1-CTX-1-RS1-RS1 | Blank        |                                                    |
| A155_Mozambique_1991     | TLC-RS1-CTX-1-CTX-1-RS1-RS1 | Blank        |                                                    |
| GP145_India_1979         | TLC-RS1-CTX-1-CTX-1-RS1-RS1 | Blank        |                                                    |
| GP106_W.Germany_1975     | TLC-RS1-CTX-1-CTX-1-RS1-RS1 | Blank        |                                                    |
| GP160_India_1980         | TLC-RS1-RS1-CTX-1           | Blank        |                                                    |
| A5_Angola_e1991          | TLC-CTX-1-RS1-CTX-1-CTX-1   | Blank        |                                                    |
| A185_Colombia_1992       | TLC-CTX-1-CTX-1-RS1         | Blank        |                                                    |
| A177_Colombia_1992       | TLC-CTX-1-CTX-1-RS1         | Blank        |                                                    |
| A184_Colombia_1992       | TLC-CTX-1-CTX-1-RS1         | Blank        |                                                    |
| A180_Colombia_1992       | TLC-CTX-1-CTX-1-RS1         | Blank        |                                                    |
| A31_Peru_e1991           | TLC-CTX-1-CTX-1-RS1         | Blank        |                                                    |
| A27_Peru_1982            | TLC-CTX-1-CTX-1-RS1         | Blank        |                                                    |
| A29_Peru_e1991           | TLC-CTX-1-CTX-1-RS1         | Blank        |                                                    |
| A32_Peru_e1991           | TLC-CTX-1-CTX-1-RS1         | Blank        |                                                    |
| A231_Mexico_1991         | TLC-CTX-1-CTX-1-RS1         | Blank        |                                                    |
| A232_Mexico_1991         | TLC-CTX-1-CTX-1-RS1         | Blank        |                                                    |
| A390_Bangladesh_M_e1991  | TLC-RS1-CTX-1-CTX-1-RS1     | Blank        |                                                    |
| A201_Argentina_e1991     | TLC-CTX-1-CTX-1-RS1         | Blank        |                                                    |
| A186_Argentina_1992      | TLC-CTX-1-CTX-1-RS1         | Blank        |                                                    |
| A200_Argentina_e1991     | TLC-CTX-1-CTX-1-RS1         | Blank        |                                                    |
| A193_Bolivia_e1991       | TLC-CTX-1-CTX-1-RS1         | Blank        |                                                    |
| A18_Sweden_1973          | TLC-CTX-1-CTX-1-RS1         | Blank        |                                                    |
| A6_Indonesia_1957        | TLC-CTX-1-CTX-1             | RS1          |                                                    |
| M66_Indonesia_1937       |                             |              |                                                    |



Table S4. SNPs used to build the 7th pandemic phylogenetic tree and associated information.

| SNP Information for the 7th Pandemic Strains |                                                                                                                                                                                                                                                                                                                                                                                                                                                                                                                                                                         |
|----------------------------------------------|-------------------------------------------------------------------------------------------------------------------------------------------------------------------------------------------------------------------------------------------------------------------------------------------------------------------------------------------------------------------------------------------------------------------------------------------------------------------------------------------------------------------------------------------------------------------------|
| SNP Position                                 | 825                                                                                                                                                                                                                                                                                                                                                                                                                                                                                                                                                                     |
|                                              | /strand=reverse                                                                                                                                                                                                                                                                                                                                                                                                                                                                                                                                                         |
|                                              | /SNP="A->G"                                                                                                                                                                                                                                                                                                                                                                                                                                                                                                                                                             |
|                                              | /codon_type=Synonymous                                                                                                                                                                                                                                                                                                                                                                                                                                                                                                                                                  |
|                                              | /taxa=VC51, V212-1, MJ1485, MJ1236, A346_2, A346_1, B33, 1627, 1346, 1362, 4670, 4672, 4121, 4110, 4111, 4113                                                                                                                                                                                                                                                                                                                                                                                                                                                           |
| SNP Position                                 | 1435                                                                                                                                                                                                                                                                                                                                                                                                                                                                                                                                                                    |
|                                              | /strand=reverse                                                                                                                                                                                                                                                                                                                                                                                                                                                                                                                                                         |
|                                              | /SNP="C->T"                                                                                                                                                                                                                                                                                                                                                                                                                                                                                                                                                             |
|                                              | /codon_type=Nonsynonymous                                                                                                                                                                                                                                                                                                                                                                                                                                                                                                                                               |
|                                              | /taxa=V212-1                                                                                                                                                                                                                                                                                                                                                                                                                                                                                                                                                            |
| SNP Position                                 | 2494                                                                                                                                                                                                                                                                                                                                                                                                                                                                                                                                                                    |
|                                              | /strand=reverse                                                                                                                                                                                                                                                                                                                                                                                                                                                                                                                                                         |
|                                              | /SNP="A->T"                                                                                                                                                                                                                                                                                                                                                                                                                                                                                                                                                             |
|                                              | /codon_type=Nonsynonymous                                                                                                                                                                                                                                                                                                                                                                                                                                                                                                                                               |
|                                              | /taxa=RC9                                                                                                                                                                                                                                                                                                                                                                                                                                                                                                                                                               |
| SNP Position                                 | 5414                                                                                                                                                                                                                                                                                                                                                                                                                                                                                                                                                                    |
|                                              | /strand=reverse                                                                                                                                                                                                                                                                                                                                                                                                                                                                                                                                                         |
|                                              | /SNP="G->A"                                                                                                                                                                                                                                                                                                                                                                                                                                                                                                                                                             |
|                                              | /codon_type=Synonymous                                                                                                                                                                                                                                                                                                                                                                                                                                                                                                                                                  |
|                                              | /taxa=MG116025, MG116226, 4660, 4675, 4663, 4662, A487_1, A487_2, CIRS101, 4679, MBN17, 2010EL_1798, 2010EL_1786, 2010EL_1792, IDHO1726, 4519, 4538, 4661, A488_2, A488_1, PRL64, MBRN14, 4122, 4488, 4600, 4585, 4536, 4623, 4605, 4593, 4552, 4551, 4642, 4656, 4646, 4339, 4322, 4784, 6210, 6215, 6214, 6212, 6196, 6191, 6195, 6193, 6194, 6201, 6197, 6180, A482, A483, A481, 7682, 7684, 7687, 7685, 7686, V5, V109, A130, A131, VC51, V212-1, MJ1485, MJ1236, A346_2, A346_1, B33, 1627, 1346, 1362, 4670, 4672, 4121, 4110, 4111, 4113, A109, A383, A330, MO10 |
| SNP Position                                 | 6622                                                                                                                                                                                                                                                                                                                                                                                                                                                                                                                                                                    |
|                                              | /strand=reverse                                                                                                                                                                                                                                                                                                                                                                                                                                                                                                                                                         |
|                                              | /SNP="G->T"                                                                                                                                                                                                                                                                                                                                                                                                                                                                                                                                                             |
|                                              | /codon_type=Nonsynonymous                                                                                                                                                                                                                                                                                                                                                                                                                                                                                                                                               |
|                                              | /taxa=PRL18                                                                                                                                                                                                                                                                                                                                                                                                                                                                                                                                                             |
| SNP Position                                 | 15074                                                                                                                                                                                                                                                                                                                                                                                                                                                                                                                                                                   |
|                                              | /SNP="G->T"                                                                                                                                                                                                                                                                                                                                                                                                                                                                                                                                                             |
|                                              | /codon_type=Synonymous                                                                                                                                                                                                                                                                                                                                                                                                                                                                                                                                                  |
|                                              | /taxa=A152, A155, A154                                                                                                                                                                                                                                                                                                                                                                                                                                                                                                                                                  |
| SNP Position                                 | 21662                                                                                                                                                                                                                                                                                                                                                                                                                                                                                                                                                                   |
|                                              | /SNP="G->A"                                                                                                                                                                                                                                                                                                                                                                                                                                                                                                                                                             |
|                                              | /codon_type=Nonsynonymous                                                                                                                                                                                                                                                                                                                                                                                                                                                                                                                                               |
|                                              | /taxa=4600                                                                                                                                                                                                                                                                                                                                                                                                                                                                                                                                                              |
| SNP Position                                 | 23148                                                                                                                                                                                                                                                                                                                                                                                                                                                                                                                                                                   |



|              |                                                  |
|--------------|--------------------------------------------------|
|              | /SNP="G->A"                                      |
|              | /codon_type=Intergenic                           |
|              | /taxa=A4                                         |
| SNP Position | 25588                                            |
|              | /strand=reverse                                  |
|              | /SNP="G->T"                                      |
|              | /codon_type=Nonsynonymous                        |
|              | /taxa=4672                                       |
| SNP Position | 27804                                            |
|              | /strand=reverse                                  |
|              | /SNP="C->T"                                      |
|              | /codon_type=Nonsynonymous                        |
|              | /taxa=A31, A27, A185, A184, A32,                 |
|              | A177, A29, A180, A232, A231,                     |
|              | A201, A186, A200, A193, A390                     |
| SNP Position | 33997                                            |
|              | /strand=reverse                                  |
|              | /SNP="T->C"                                      |
|              | /codon_type=Synonymous                           |
|              | /taxa=6210, 6215, 6214, 6212, 6196,              |
|              | 6191, 6195, 6193, 6194, 6201,                    |
|              | 6197, 6180                                       |
| SNP Position | 34254                                            |
|              | /strand=reverse                                  |
|              | /SNP="C->T"                                      |
|              | /codon_type=Nonsynonymous                        |
|              | /taxa=A5, A31, A27, A185, A184,                  |
|              | A32, A177, A29, A180, A232,                      |
|              | A231, A201, A186, A200, A193,                    |
|              | A390                                             |
| SNP Position | 42082                                            |
|              | /strand=reverse                                  |
|              | /SNP="A->C"                                      |
|              | /codon_type=Nonsynonymous                        |
|              | /taxa=MG116025, MG116226, 4660, 4675, 4663,      |
|              | 4662, A487_1, A487_2, CIRS101, 4679, MBN17,      |
|              | 2010EL_1798, 2010EL_1786, 2010EL_1792, IDHO1726, |
|              | 4519, 4538, 4661, A488_2, A488_1,                |
|              | PRL64, MBRN14, 4122, 4488, 4600,                 |
|              | 4585, 4536, 4623, 4605, 4593,                    |
|              | 4552, 4551, 4642, 4656, 4646,                    |
|              | 4339, 4322, 4784, 6210, 6215,                    |
|              | 6214, 6212, 6196, 6191, 6195,                    |
|              | 6193, 6194, 6201, 6197, 6180,                    |
|              | A482, A483, A481, 7682, 7684,                    |
|              | 7687, 7685, 7686, V5, V109,                      |
|              | A130, A131, VC51, V212-1, MJ1485, MJ1236,        |
|              | A346_2, A346_1, B33, 1627, 1346, 1362,           |
|              | 4670, 4672, 4121, 4110, 4111,                    |
|              | 4113, A109, A383, A330, MO10, PRL5,              |
|              | A316, A245, A241, A10, GP140, RC9,               |
|              | GP143, GP152, A397, A22, GP60                    |
| SNP Position | 47520                                            |

|              |                                                     |
|--------------|-----------------------------------------------------|
|              | /SNP="C->T"                                         |
|              | /codon_type=Nonsynonymous                           |
|              | /taxa=4623                                          |
| SNP Position | 49027                                               |
|              | /strand=reverse                                     |
|              | /SNP="T->C"                                         |
|              | /codon_type=Nonsynonymous                           |
|              | /taxa=A330                                          |
| SNP Position | 50039                                               |
|              | /SNP="C->T"                                         |
|              | /codon_type=Synonymous                              |
|              | /taxa=V212-1                                        |
| SNP Position | 51020                                               |
|              | /SNP="C->T"                                         |
|              | /codon_type=Nonsynonymous                           |
|              | /taxa=PRL18                                         |
| SNP Position | 59473                                               |
|              | /SNP="C->T"                                         |
|              | /codon_type=Synonymous                              |
|              | /taxa=A245, A241                                    |
| SNP Position | 59817                                               |
|              | /SNP="A->G"                                         |
|              | /codon_type=Intergenic                              |
|              | /taxa=A4                                            |
| SNP Position | 62257                                               |
|              | /SNP="A->T"                                         |
|              | /codon_type=Nonsynonymous                           |
|              | /taxa=B33, 1627, 1346, 1362                         |
| SNP Position | 68893                                               |
|              | /strand=reverse                                     |
|              | /SNP="C->T"                                         |
|              | /codon_type=Nonsynonymous                           |
|              | /taxa=A152, A155, A154                              |
| SNP Position | 70605                                               |
|              | /SNP="T->C"                                         |
|              | /codon_type=Nonsynonymous                           |
|              | /taxa=GP60                                          |
| SNP Position | 72585                                               |
|              | /SNP="G->A"                                         |
|              | /codon_type=Synonymous                              |
|              | /taxa=4663, 4662, A487_1, A487_2, CIRS101,          |
|              | 4679, MBN17, 2010EL_1798, 2010EL_1786, 2010EL_1792, |
|              | IDHO1726, 4519, 4538, 4661, A488_2,                 |
|              | A488_1                                              |
| SNP Position | 74144                                               |
|              | /SNP="G->A"                                         |
|              | /codon_type=Synonymous                              |
|              | /taxa=A383                                          |
| SNP Position | 84054                                               |
|              | /SNP="C->T"                                         |
|              | /codon_type=Synonymous                              |
|              | /taxa=A245                                          |
| SNP Position | 89430                                               |

|              |                                     |
|--------------|-------------------------------------|
|              | /strand=reverse                     |
|              | /SNP="A->T"                         |
|              | /codon_type=Nonsynonymous           |
|              | /taxa=4784, 6210, 6215, 6214, 6212, |
|              | 6196, 6191, 6195, 6193, 6194,       |
|              | 6201, 6197, 6180, A482, A483,       |
|              | A481, 7682, 7684, 7687, 7685,       |
|              | 7686                                |
| SNP Position | 103247                              |
|              | /SNP="G->A"                         |
|              | /codon_type=Nonsynonymous           |
|              | /taxa=A383, A330, MO10              |
| SNP Position | 110502                              |
|              | /SNP="C->T"                         |
|              | /codon_type=Nonsynonymous           |
|              | /taxa=A29                           |
| SNP Position | 116786                              |
|              | /SNP="A->G"                         |
|              | /codon_type=Nonsynonymous           |
|              | /taxa=A152, A155, A154              |
| SNP Position | 116869                              |
|              | /SNP="T->G"                         |
|              | /codon_type=Nonsynonymous           |
|              | /taxa=4538                          |
| SNP Position | 117490                              |
|              | /SNP="C->T"                         |
|              | /codon_type=Nonsynonymous           |
|              | /taxa=V5                            |
| SNP Position | 125122                              |
|              | /SNP="A->C"                         |
|              | /codon_type=Nonsynonymous           |
|              | /taxa=RC9, GP143, GP152, A397, A22, |
|              | GP60                                |
| SNP Position | 126236                              |
|              | /SNP="T->C"                         |
|              | /codon_type=Nonsynonymous           |
|              | /taxa=GP143                         |
| SNP Position | 126947                              |
|              | /strand=reverse                     |
|              | /SNP="G->C"                         |
|              | /codon_type=Nonsynonymous           |
|              | /taxa=RC9                           |
| SNP Position | 129480                              |
|              | /strand=reverse                     |
|              | /SNP="T->C"                         |
|              | /codon_type=Synonymous              |
|              | /taxa=A4                            |
| SNP Position | 136455                              |
|              | /strand=reverse                     |
|              | /SNP="T->G"                         |
|              | /codon_type=Nonsynonymous           |
|              | /taxa=CIRS101                       |
| SNP Position | 137164                              |

|              |                                                     |
|--------------|-----------------------------------------------------|
|              | /SNP="G->A"                                         |
|              | /codon_type=Nonsynonymous                           |
|              | /taxa=A4                                            |
| SNP Position | 137214                                              |
|              | /SNP="T->C"                                         |
|              | /codon_type=Synonymous                              |
|              | /taxa=CIRS101, 4679, MBN17, 2010EL_1798,            |
|              | 2010EL_1786, 2010EL_1792, IDHO1726, 4519, 4538      |
| SNP Position | 139591                                              |
|              | /SNP="T->C"                                         |
|              | /codon_type=Synonymous                              |
|              | /taxa=2010EL_1798, 2010EL_1786, 2010EL_1792         |
| SNP Position | 141168                                              |
|              | /strand=reverse                                     |
|              | /SNP="T->C"                                         |
|              | /codon_type=Synonymous                              |
|              | /taxa=A4                                            |
| SNP Position | 143732                                              |
|              | /SNP="C->T"                                         |
|              | /codon_type=Nonsynonymous                           |
|              | /taxa=RC9                                           |
| SNP Position | 144569                                              |
|              | /strand=reverse                                     |
|              | /SNP="G->A"                                         |
|              | /codon_type=Nonsynonymous                           |
|              | /taxa=MG116025, MG116226, 4660, 4675, 4663,         |
|              | 4662, A487_1, A487_2, CIRS101, 4679, MBN17,         |
|              | 2010EL_1798, 2010EL_1786, 2010EL_1792, IDHO1726,    |
|              | 4519, 4538, 4661, A488_2, A488_1,                   |
|              | PRL64, MBRN14, 4122, 4488, 4600,                    |
|              | 4585, 4536, 4623, 4605, 4593,                       |
|              | 4552, 4551, 4642, 4656, 4646,                       |
|              | 4339, 4322, 4784, 6210, 6215,                       |
|              | 6214, 6212, 6196, 6191, 6195,                       |
|              | 6193, 6194, 6201, 6197, 6180,                       |
|              | A482, A483, A481, 7682, 7684,                       |
|              | 7687, 7685, 7686, V5, V109,                         |
|              | A130, A131, VC51, V212-1, MJ1485, MJ1236,           |
|              | A346_2, A346_1, B33, 1627, 1346, 1362,              |
|              | 4670, 4672, 4121, 4110, 4111, 4113                  |
| SNP Position | 147853                                              |
|              | /strand=reverse                                     |
|              | /SNP="C->A"                                         |
|              | /codon_type=Nonsynonymous                           |
|              | /taxa=A488_2, A488_1                                |
| SNP Position | 148860                                              |
|              | /strand=reverse                                     |
|              | /SNP="C->T"                                         |
|              | /codon_type=Nonsynonymous                           |
|              | /taxa=2010EL_1798, 2010EL_1786, 2010EL_1792         |
| SNP Position | 151043                                              |
|              | /SNP="C->A"                                         |
|              | /homoplasy=convergence with branch leading to 4339, |

|              |                                                                                                                                                                                                                                                                                                                                                                                                                                                                                                                                                                                                                                                                                                                    |
|--------------|--------------------------------------------------------------------------------------------------------------------------------------------------------------------------------------------------------------------------------------------------------------------------------------------------------------------------------------------------------------------------------------------------------------------------------------------------------------------------------------------------------------------------------------------------------------------------------------------------------------------------------------------------------------------------------------------------------------------|
|              | convergence with branch leading to 231                                                                                                                                                                                                                                                                                                                                                                                                                                                                                                                                                                                                                                                                             |
|              | /codon_type=Intergenic                                                                                                                                                                                                                                                                                                                                                                                                                                                                                                                                                                                                                                                                                             |
|              | /taxa=MG116025, MG116226                                                                                                                                                                                                                                                                                                                                                                                                                                                                                                                                                                                                                                                                                           |
| SNP Position | 151043                                                                                                                                                                                                                                                                                                                                                                                                                                                                                                                                                                                                                                                                                                             |
|              | /SNP="C->A"                                                                                                                                                                                                                                                                                                                                                                                                                                                                                                                                                                                                                                                                                                        |
|              | /homoplasy=convergence with branch leading to 2,<br>convergence with branch leading to 231                                                                                                                                                                                                                                                                                                                                                                                                                                                                                                                                                                                                                         |
|              | /codon_type=Intergenic                                                                                                                                                                                                                                                                                                                                                                                                                                                                                                                                                                                                                                                                                             |
|              | /taxa=4339                                                                                                                                                                                                                                                                                                                                                                                                                                                                                                                                                                                                                                                                                                         |
| SNP Position | 151043                                                                                                                                                                                                                                                                                                                                                                                                                                                                                                                                                                                                                                                                                                             |
|              | /SNP="C->A"                                                                                                                                                                                                                                                                                                                                                                                                                                                                                                                                                                                                                                                                                                        |
|              | /homoplasy=convergence with branch leading to 2,<br>convergence with branch leading to 4339                                                                                                                                                                                                                                                                                                                                                                                                                                                                                                                                                                                                                        |
|              | /codon_type=Intergenic                                                                                                                                                                                                                                                                                                                                                                                                                                                                                                                                                                                                                                                                                             |
|              | /taxa=4672, 4121, 4110, 4111, 4113                                                                                                                                                                                                                                                                                                                                                                                                                                                                                                                                                                                                                                                                                 |
| SNP Position | 155949                                                                                                                                                                                                                                                                                                                                                                                                                                                                                                                                                                                                                                                                                                             |
|              | /SNP="A->G"                                                                                                                                                                                                                                                                                                                                                                                                                                                                                                                                                                                                                                                                                                        |
|              | /codon_type=Intergenic                                                                                                                                                                                                                                                                                                                                                                                                                                                                                                                                                                                                                                                                                             |
|              | /taxa=MG116025, MG116226, 4660, 4675, 4663,<br>4662, A487_1, A487_2, CIRS101, 4679, MBN17,<br>2010EL_1798, 2010EL_1786, 2010EL_1792, IDHO1726,<br>4519, 4538, 4661, A488_2, A488_1,<br>PRL64, MBRN14, 4122, 4488, 4600,<br>4585, 4536, 4623, 4605, 4593,<br>4552, 4551, 4642, 4656, 4646,<br>4339, 4322, 4784, 6210, 6215,<br>6214, 6212, 6196, 6191, 6195,<br>6193, 6194, 6201, 6197, 6180,<br>A482, A483, A481, 7682, 7684,<br>7687, 7685, 7686, V5, V109,<br>A130, A131, VC51, V212-1, MJ1485, MJ1236,<br>A346_2, A346_1, B33, 1627, 1346, 1362,<br>4670, 4672, 4121, 4110, 4111,<br>4113, A109, A383, A330, MO10, PRL5,<br>A316, A245, A241, A10, GP140, RC9,<br>GP143, GP152, A397, A22, GP60, N16961,<br>A19 |
| SNP Position | 155976                                                                                                                                                                                                                                                                                                                                                                                                                                                                                                                                                                                                                                                                                                             |
|              | /SNP="A->G"                                                                                                                                                                                                                                                                                                                                                                                                                                                                                                                                                                                                                                                                                                        |
|              | /codon_type=Intergenic                                                                                                                                                                                                                                                                                                                                                                                                                                                                                                                                                                                                                                                                                             |
|              | /taxa=A5, A31, A27, A185, A184,<br>A32, A177, A29, A180, A232,<br>A231, A201, A186, A200, A193,<br>A390, GP145, GP160, GP106, A152,<br>A155, A154, A4, PRL18                                                                                                                                                                                                                                                                                                                                                                                                                                                                                                                                                       |
| SNP Position | 159549                                                                                                                                                                                                                                                                                                                                                                                                                                                                                                                                                                                                                                                                                                             |
|              | /strand=reverse                                                                                                                                                                                                                                                                                                                                                                                                                                                                                                                                                                                                                                                                                                    |
|              | /SNP="A->G"                                                                                                                                                                                                                                                                                                                                                                                                                                                                                                                                                                                                                                                                                                        |
|              | /codon_type=Nonsynonymous                                                                                                                                                                                                                                                                                                                                                                                                                                                                                                                                                                                                                                                                                          |
|              | /taxa=A4                                                                                                                                                                                                                                                                                                                                                                                                                                                                                                                                                                                                                                                                                                           |
| SNP Position | 160398                                                                                                                                                                                                                                                                                                                                                                                                                                                                                                                                                                                                                                                                                                             |
|              | /strand=reverse                                                                                                                                                                                                                                                                                                                                                                                                                                                                                                                                                                                                                                                                                                    |
|              | /SNP="C->T"                                                                                                                                                                                                                                                                                                                                                                                                                                                                                                                                                                                                                                                                                                        |

|              |                                                  |
|--------------|--------------------------------------------------|
|              | /codon_type=Nonsynonymous                        |
|              | /taxa=V109                                       |
| SNP Position | 162624                                           |
|              | /strand=reverse                                  |
|              | /SNP="G->A"                                      |
|              | /codon_type=SNOP (non-stop codon to stop condon) |
|              | /taxa=A4                                         |
| SNP Position | 164418                                           |
|              | /SNP="A->G"                                      |
|              | /codon_type=Nonsynonymous                        |
|              | /taxa=A397                                       |
| SNP Position | 167268                                           |
|              | /SNP="G->A"                                      |
|              | /codon_type=Intergenic                           |
|              | /taxa=A186, A200, A193                           |
| SNP Position | 167384                                           |
|              | /SNP="G->A"                                      |
|              | /codon_type=Intergenic                           |
|              | /taxa=A180                                       |
| SNP Position | 169910                                           |
|              | /SNP="G->A"                                      |
|              | /codon_type=Nonsynonymous                        |
|              | /taxa=A346_2, A346_1                             |
| SNP Position | 170848                                           |
|              | /SNP="C->T"                                      |
|              | /codon_type=Synonymous                           |
|              | /taxa=V5                                         |
| SNP Position | 170925                                           |
|              | /SNP="C->T"                                      |
|              | /codon_type=Nonsynonymous                        |
|              | /taxa=B33, 1627, 1346, 1362                      |
| SNP Position | 173961                                           |
|              | /SNP="A->G"                                      |
|              | /codon_type=Nonsynonymous                        |
|              | /taxa=A4                                         |
| SNP Position | 182454                                           |
|              | /SNP="C->T"                                      |
|              | /codon_type=Synonymous                           |
|              | /taxa=MG116025, MG116226                         |
| SNP Position | 182735                                           |
|              | /SNP="C->T"                                      |
|              | /codon_type=Nonsynonymous                        |
|              | /taxa=MG116025, MG116226, 4660, 4675, 4663,      |
|              | 4662, A487_1, A487_2, CIRS101, 4679, MBN17,      |
|              | 2010EL_1798, 2010EL_1786, 2010EL_1792, IDHO1726, |
|              | 4519, 4538, 4661, A488_2, A488_1,                |
|              | PRL64, MBRN14, 4122, 4488, 4600,                 |
|              | 4585, 4536, 4623, 4605, 4593,                    |
|              | 4552, 4551, 4642, 4656, 4646,                    |
|              | 4339, 4322, 4784, 6210, 6215,                    |
|              | 6214, 6212, 6196, 6191, 6195,                    |
|              | 6193, 6194, 6201, 6197, 6180,                    |
|              | A482, A483, A481, 7682, 7684,                    |

|              |                                                   |
|--------------|---------------------------------------------------|
|              | 7687, 7685, 7686, V5, V109,                       |
|              | A130, A131, VC51, V212-1, MJ1485, MJ1236,         |
|              | A346_2, A346_1, B33, 1627, 1346, 1362,            |
|              | 4670, 4672, 4121, 4110, 4111,                     |
|              | 4113, A109                                        |
| SNP Position | 184804                                            |
|              | /strand=reverse                                   |
|              | /SNP="G->A"                                       |
|              | /codon_type=Synonymous                            |
|              | /taxa=A383                                        |
| SNP Position | 185099                                            |
|              | /strand=reverse                                   |
|              | /SNP="G->T"                                       |
|              | /codon_type=Nonsynonymous                         |
|              | /taxa=A5, A31, A27, A185, A184,                   |
|              | A32, A177, A29, A180, A232,                       |
|              | A231, A201, A186, A200, A193,                     |
|              | A390, GP145, GP160, GP106, A152,                  |
|              | A155, A154                                        |
| SNP Position | 187462                                            |
|              | /strand=reverse                                   |
|              | /SNP="C->T"                                       |
|              | /codon_type=Synonymous                            |
|              | /taxa=A383, A330, MO10                            |
| SNP Position | 188880                                            |
|              | /strand=reverse                                   |
|              | /SNP="C->T"                                       |
|              | /codon_type=Synonymous                            |
|              | /taxa=4121, 4110, 4111, 4113                      |
| SNP Position | 189316                                            |
|              | /strand=reverse                                   |
|              | /SNP="G->A"                                       |
|              | /codon_type=Nonsynonymous                         |
|              | /taxa=GP152                                       |
| SNP Position | 190191                                            |
|              | /strand=reverse                                   |
|              | /SNP="C->A"                                       |
|              | /codon_type=Nonsynonymous                         |
|              | /taxa=4670                                        |
| SNP Position | 191990                                            |
|              | /SNP="A->C"                                       |
|              | /codon_type=Intergenic                            |
|              | /taxa=A18                                         |
| SNP Position | 199598                                            |
|              | /strand=reverse                                   |
|              | /SNP="C->T"                                       |
|              | /homoplasy=convergence with branch leading to M66 |
|              | /codon_type=Synonymous                            |
|              | /taxa=PRL18                                       |
| SNP Position | 200144                                            |
|              | /strand=reverse                                   |
|              | /SNP="A->G"                                       |
|              | /codon_type=Synonymous                            |

|              |                                                   |
|--------------|---------------------------------------------------|
|              | /taxa=2010EL_1798, 2010EL_1786, 2010EL_1792       |
| SNP Position | 203857                                            |
|              | /SNP="G->A"                                       |
|              | /codon_type=Nonsynonymous                         |
|              | /taxa=B33, 1627, 1346, 1362                       |
| SNP Position | 208078                                            |
|              | /SNP="C->A"                                       |
|              | /codon_type=Nonsynonymous                         |
|              | /taxa=A245                                        |
| SNP Position | 211988                                            |
|              | /SNP="G->T"                                       |
|              | /codon_type=Nonsynonymous                         |
|              | /taxa=A397                                        |
| SNP Position | 212579                                            |
|              | /strand=reverse                                   |
|              | /SNP="T->A"                                       |
|              | /codon_type=Nonsynonymous                         |
|              | /taxa=A27                                         |
| SNP Position | 215519                                            |
|              | /SNP="C->T"                                       |
|              | /homoplasy=convergence with branch leading to M66 |
|              | /codon_type=Synonymous                            |
|              | /taxa=A4                                          |
| SNP Position | 221288                                            |
|              | /strand=reverse                                   |
|              | /SNP="T->C"                                       |
|              | /codon_type=Synonymous                            |
|              | /taxa=A4                                          |
| SNP Position | 228046                                            |
|              | /SNP="G->A"                                       |
|              | /codon_type=Nonsynonymous                         |
|              | /taxa=PRL5                                        |
| SNP Position | 228108                                            |
|              | /SNP="A->G"                                       |
|              | /codon_type=Synonymous                            |
|              | /taxa=4121, 4110, 4111, 4113                      |
| SNP Position | 228600                                            |
|              | /strand=reverse                                   |
|              | /SNP="C->T"                                       |
|              | /codon_type=Nonsynonymous                         |
|              | /taxa=PRL18                                       |
| SNP Position | 228855                                            |
|              | /SNP="T->C"                                       |
|              | /codon_type=Intergenic                            |
|              | /taxa=GP60                                        |
| SNP Position | 234339                                            |
|              | /strand=reverse                                   |
|              | /SNP="C->T"                                       |
|              | /codon_type=Nonsynonymous                         |
|              | /taxa=A245, A241                                  |
| SNP Position | 237956                                            |
|              | /strand=reverse                                   |
|              | /SNP="G->A"                                       |



|              |                            |
|--------------|----------------------------|
|              | /codon_type=Nonsynonymous  |
|              | /taxa=A397                 |
| SNP Position | 238743                     |
|              | /strand=reverse            |
|              | /SNP="G->A"                |
|              | /codon_type=Synonymous     |
|              | /taxa=4661, A488_2, A488_1 |
| SNP Position | 245860                     |
|              | /strand=reverse            |
|              | /SNP="T->A"                |
|              | /codon_type=Synonymous     |
|              | /taxa=A383, A330, MO10     |
| SNP Position | 245863                     |
|              | /strand=reverse            |
|              | /SNP="C->T"                |
|              | /codon_type=Synonymous     |
|              | /taxa=A383, A330, MO10     |
| SNP Position | 245869                     |
|              | /strand=reverse            |
|              | /SNP="A->G"                |
|              | /codon_type=Synonymous     |
|              | /taxa=A383, A330, MO10     |
| SNP Position | 245885                     |
|              | /strand=reverse            |
|              | /SNP="A->G"                |
|              | /codon_type=Nonsynonymous  |
|              | /taxa=A383, A330, MO10     |
| SNP Position | 245890                     |
|              | /strand=reverse            |
|              | /SNP="A->G"                |
|              | /codon_type=Synonymous     |
|              | /taxa=A383, A330, MO10     |
| SNP Position | 245902                     |
|              | /strand=reverse            |
|              | /SNP="G->A"                |
|              | /codon_type=Synonymous     |
|              | /taxa=A383, A330, MO10     |
| SNP Position | 245938                     |
|              | /strand=reverse            |
|              | /SNP="G->A"                |
|              | /codon_type=Synonymous     |
|              | /taxa=A383, A330, MO10     |
| SNP Position | 245998                     |
|              | /strand=reverse            |
|              | /SNP="G->A"                |
|              | /codon_type=Synonymous     |
|              | /taxa=A383, A330, MO10     |
| SNP Position | 246006                     |
|              | /strand=reverse            |
|              | /SNP="G->A"                |
|              | /codon_type=Synonymous     |
|              | /taxa=A383, A330, MO10     |
| SNP Position | 246046                     |

|              |                                                  |
|--------------|--------------------------------------------------|
|              | /strand=reverse                                  |
|              | /SNP="G->A"                                      |
|              | /codon_type=Synonymous                           |
|              | /taxa=A383, A330, MO10                           |
| SNP Position | 246688                                           |
|              | /SNP="C->T"                                      |
|              | /codon_type=Nonsynonymous                        |
|              | /taxa=VC51, V212-1, MJ1485, MJ1236, A346_2,      |
|              | A346_1, B33, 1627, 1346, 1362, 4670,             |
|              | 4672, 4121, 4110, 4111, 4113                     |
| SNP Position | 252140                                           |
|              | /SNP="G->A"                                      |
|              | /codon_type=Nonsynonymous                        |
|              | /taxa=MG116025, MG116226                         |
| SNP Position | 254692                                           |
|              | /SNP="T->A"                                      |
|              | /codon_type=Nonsynonymous                        |
|              | /taxa=1362                                       |
| SNP Position | 254869                                           |
|              | /SNP="C->T"                                      |
|              | /codon_type=Synonymous                           |
|              | /taxa=MG116025, MG116226, 4660, 4675, 4663,      |
|              | 4662, A487_1, A487_2, CIRS101, 4679, MBN17,      |
|              | 2010EL_1798, 2010EL_1786, 2010EL_1792, IDHO1726, |
|              | 4519, 4538, 4661, A488_2, A488_1,                |
|              | PRL64, MBRN14, 4122, 4488, 4600,                 |
|              | 4585, 4536, 4623, 4605, 4593,                    |
|              | 4552, 4551, 4642, 4656, 4646,                    |
|              | 4339, 4322, 4784, 6210, 6215,                    |
|              | 6214, 6212, 6196, 6191, 6195,                    |
|              | 6193, 6194, 6201, 6197, 6180,                    |
|              | A482, A483, A481, 7682, 7684,                    |
|              | 7687, 7685, 7686, V5, V109,                      |
|              | A130, A131, VC51, V212-1, MJ1485, MJ1236,        |
|              | A346_2, A346_1, B33, 1627, 1346, 1362,           |
|              | 4670, 4672, 4121, 4110, 4111,                    |
|              | 4113, A109, A383, A330, MO10, PRL5,              |
|              | A316, A245, A241, A10, GP140, RC9,               |
|              | GP143, GP152, A397, A22, GP60, N16961,           |
|              | A19                                              |
| SNP Position | 255429                                           |
|              | /SNP="C->T"                                      |
|              | /codon_type=Nonsynonymous                        |
|              | /taxa=GP143                                      |
| SNP Position | 258823                                           |
|              | /SNP="G->A"                                      |
|              | /codon_type=Nonsynonymous                        |
|              | /taxa=4661                                       |
| SNP Position | 259085                                           |
|              | /SNP="G->A"                                      |
|              | /codon_type=SNOP (non-stop codon to stop condon) |
|              | /taxa=A4                                         |
| SNP Position | 260643                                           |

|              |                        |
|--------------|------------------------|
|              | /SNP="T->C"            |
|              | /codon_type=Intergenic |
|              | /taxa=A383, A330, MO10 |
| SNP Position | 260664                 |
|              | /SNP="A->T"            |
|              | /codon_type=Intergenic |
|              | /taxa=A383, A330, MO10 |
| SNP Position | 260675                 |
|              | /SNP="A->T"            |
|              | /codon_type=Intergenic |
|              | /taxa=A383, A330, MO10 |
| SNP Position | 260691                 |
|              | /SNP="A->C"            |
|              | /codon_type=Intergenic |
|              | /taxa=A383, A330, MO10 |
| SNP Position | 260707                 |
|              | /SNP="A->T"            |
|              | /codon_type=Intergenic |
|              | /taxa=A383, A330, MO10 |
| SNP Position | 260715                 |
|              | /SNP="T->C"            |
|              | /codon_type=Intergenic |
|              | /taxa=A383, A330, MO10 |
| SNP Position | 260734                 |
|              | /SNP="G->A"            |
|              | /codon_type=Intergenic |
|              | /taxa=A383, A330, MO10 |
| SNP Position | 260751                 |
|              | /SNP="T->A"            |
|              | /codon_type=Intergenic |
|              | /taxa=A383, A330, MO10 |
| SNP Position | 260803                 |
|              | /SNP="C->T"            |
|              | /codon_type=Intergenic |
|              | /taxa=A383, A330, MO10 |
| SNP Position | 260897                 |
|              | /SNP="A->T"            |
|              | /codon_type=Intergenic |
|              | /taxa=A383, A330, MO10 |
| SNP Position | 260913                 |
|              | /SNP="G->T"            |
|              | /codon_type=Intergenic |
|              | /taxa=A383, A330, MO10 |
| SNP Position | 260949                 |
|              | /SNP="C->A"            |
|              | /codon_type=Intergenic |
|              | /taxa=A383, A330, MO10 |
| SNP Position | 260988                 |
|              | /SNP="T->G"            |
|              | /codon_type=Intergenic |
|              | /taxa=A383, A330, MO10 |
| SNP Position | 260999                 |
|              | /SNP="G->T"            |

|              |                        |
|--------------|------------------------|
|              | /codon_type=Intergenic |
|              | /taxa=A383, A330, MO10 |
| SNP Position | 261017                 |
|              | /SNP="T->G"            |
|              | /codon_type=Intergenic |
|              | /taxa=A383, A330, MO10 |
| SNP Position | 261023                 |
|              | /SNP="T->C"            |
|              | /codon_type=Intergenic |
|              | /taxa=A383, A330, MO10 |
| SNP Position | 261047                 |
|              | /SNP="A->C"            |
|              | /codon_type=Intergenic |
|              | /taxa=A383, A330, MO10 |
| SNP Position | 261069                 |
|              | /SNP="A->G"            |
|              | /codon_type=Intergenic |
|              | /taxa=A383, A330, MO10 |
| SNP Position | 261081                 |
|              | /SNP="G->A"            |
|              | /codon_type=Intergenic |
|              | /taxa=A383, A330, MO10 |
| SNP Position | 261095                 |
|              | /SNP="A->G"            |
|              | /codon_type=Intergenic |
|              | /taxa=A383, A330, MO10 |
| SNP Position | 261110                 |
|              | /SNP="T->G"            |
|              | /codon_type=Intergenic |
|              | /taxa=A383, A330, MO10 |
| SNP Position | 261126                 |
|              | /SNP="G->A"            |
|              | /codon_type=Intergenic |
|              | /taxa=A383, A330, MO10 |
| SNP Position | 261146                 |
|              | /SNP="T->C"            |
|              | /codon_type=Intergenic |
|              | /taxa=A383, A330, MO10 |
| SNP Position | 261170                 |
|              | /SNP="A->G"            |
|              | /codon_type=Intergenic |
|              | /taxa=A383, A330, MO10 |
| SNP Position | 261176                 |
|              | /SNP="C->T"            |
|              | /codon_type=Intergenic |
|              | /taxa=A383, A330, MO10 |
| SNP Position | 261189                 |
|              | /SNP="C->T"            |
|              | /codon_type=Intergenic |
|              | /taxa=A383, A330, MO10 |
| SNP Position | 261242                 |
|              | /SNP="C->T"            |
|              | /codon_type=Intergenic |

|              |                        |
|--------------|------------------------|
|              | /taxa=A383, A330, MO10 |
| SNP Position | 261278                 |
|              | /SNP="A->G"            |
|              | /codon_type=Intergenic |
|              | /taxa=A383, A330, MO10 |
| SNP Position | 261314                 |
|              | /SNP="A->C"            |
|              | /codon_type=Intergenic |
|              | /taxa=A383, A330, MO10 |
| SNP Position | 261338                 |
|              | /SNP="A->G"            |
|              | /codon_type=Intergenic |
|              | /taxa=A383, A330, MO10 |
| SNP Position | 261347                 |
|              | /SNP="T->C"            |
|              | /codon_type=Intergenic |
|              | /taxa=A383, A330, MO10 |
| SNP Position | 261349                 |
|              | /SNP="T->G"            |
|              | /codon_type=Intergenic |
|              | /taxa=A383, A330, MO10 |
| SNP Position | 261386                 |
|              | /SNP="T->C"            |
|              | /codon_type=Intergenic |
|              | /taxa=A383, A330, MO10 |
| SNP Position | 261423                 |
|              | /SNP="C->T"            |
|              | /codon_type=Intergenic |
|              | /taxa=A383, A330, MO10 |
| SNP Position | 261443                 |
|              | /SNP="C->A"            |
|              | /codon_type=Intergenic |
|              | /taxa=A383, A330, MO10 |
| SNP Position | 261470                 |
|              | /SNP="A->T"            |
|              | /codon_type=Intergenic |
|              | /taxa=A383, A330, MO10 |
| SNP Position | 261562                 |
|              | /SNP="A->G"            |
|              | /codon_type=Intergenic |
|              | /taxa=A383, A330, MO10 |
| SNP Position | 261580                 |
|              | /SNP="C->T"            |
|              | /codon_type=Intergenic |
|              | /taxa=A383, A330, MO10 |
| SNP Position | 261611                 |
|              | /SNP="C->A"            |
|              | /codon_type=Intergenic |
|              | /taxa=A383, A330, MO10 |
| SNP Position | 261689                 |
|              | /SNP="T->A"            |
|              | /codon_type=Intergenic |
|              | /taxa=A383, A330, MO10 |

|              |                              |
|--------------|------------------------------|
| SNP Position | 261690                       |
|              | /SNP="T->C"                  |
|              | /codon_type=Intergenic       |
|              | /taxa=A383, A330, MO10       |
| SNP Position | 261700                       |
|              | /SNP="A->G"                  |
|              | /codon_type=Intergenic       |
|              | /taxa=A383, A330, MO10       |
| SNP Position | 261704                       |
|              | /SNP="G->T"                  |
|              | /codon_type=Intergenic       |
|              | /taxa=A383, A330, MO10       |
| SNP Position | 261717                       |
|              | /SNP="G->C"                  |
|              | /codon_type=Intergenic       |
|              | /taxa=A383, A330, MO10       |
| SNP Position | 261734                       |
|              | /SNP="C->T"                  |
|              | /codon_type=Intergenic       |
|              | /taxa=A383, A330, MO10       |
| SNP Position | 261755                       |
|              | /SNP="A->G"                  |
|              | /codon_type=Intergenic       |
|              | /taxa=A383, A330, MO10       |
| SNP Position | 261758                       |
|              | /SNP="C->T"                  |
|              | /codon_type=Intergenic       |
|              | /taxa=A383, A330, MO10       |
| SNP Position | 261785                       |
|              | /SNP="C->T"                  |
|              | /codon_type=Intergenic       |
|              | /taxa=A383, A330, MO10       |
| SNP Position | 261831                       |
|              | /SNP="C->A"                  |
|              | /codon_type=Intergenic       |
|              | /taxa=A383, A330, MO10       |
| SNP Position | 261879                       |
|              | /SNP="A->G"                  |
|              | /codon_type=Intergenic       |
|              | /taxa=A383, A330, MO10       |
| SNP Position | 261925                       |
|              | /SNP="G->A"                  |
|              | /codon_type=Intergenic       |
|              | /taxa=A383, A330, MO10       |
| SNP Position | 262100                       |
|              | /SNP="G->A"                  |
|              | /codon_type=Nonsynonymous    |
|              | /taxa=4121, 4110, 4111, 4113 |
| SNP Position | 262200                       |
|              | /SNP="G->A"                  |
|              | /codon_type=Nonsynonymous    |
|              | /taxa=A152, A155, A154       |
| SNP Position | 262248                       |

|              |                                                       |
|--------------|-------------------------------------------------------|
|              | /SNP="A->T"                                           |
|              | /codon_type=SNOP (non-stop codon to stop condon)      |
|              | /taxa=6210, 6215, 6214, 6212, 6196,                   |
|              | 6191, 6195, 6193, 6194, 6201,                         |
|              | 6197, 6180                                            |
| SNP Position | 263753                                                |
|              | /SNP="T->G"                                           |
|              | /codon_type=Nonsynonymous                             |
|              | /taxa=MG116226                                        |
| SNP Position | 263753                                                |
|              | /SNP="T->C"                                           |
|              | /codon_type=Nonsynonymous                             |
|              | /taxa=GP152, A397, A22, GP60                          |
| SNP Position | 263830                                                |
|              | /SNP="C->T"                                           |
|              | /homoplasy=reversal from branch leading to 12         |
|              | /codon_type=Nonsynonymous                             |
|              | /taxa=2010EL_1798, 2010EL_1786, 2010EL_1792, IDHO1726 |
| SNP Position | 263830                                                |
|              | /SNP="T->C"                                           |
|              | /homoplasy=reversed in branch leading to 27           |
|              | /codon_type=Nonsynonymous                             |
|              | /taxa=4663, 4662, A487_1, A487_2, CIRS101,            |
|              | 4679, MBN17, 2010EL_1798, 2010EL_1786, 2010EL_1792,   |
|              | IDHO1726, 4519, 4538                                  |
| SNP Position | 263834                                                |
|              | /SNP="C->T"                                           |
|              | /codon_type=Nonsynonymous                             |
|              | /taxa=A482, A483, A481, 7682, 7684,                   |
|              | 7687, 7685, 7686                                      |
| SNP Position | 264112                                                |
|              | /SNP="G->T"                                           |
|              | /codon_type=SNOP (non-stop codon to stop condon)      |
|              | /taxa=A18                                             |
| SNP Position | 266502                                                |
|              | /strand=reverse                                       |
|              | /SNP="C->T"                                           |
|              | /codon_type=Synonymous                                |
|              | /taxa=A152, A155, A154                                |
| SNP Position | 269244                                                |
|              | /SNP="T->G"                                           |
|              | /codon_type=Synonymous                                |
|              | /taxa=A383, A330, MO10                                |
| SNP Position | 269286                                                |
|              | /SNP="T->C"                                           |
|              | /codon_type=Synonymous                                |
|              | /taxa=A383, A330, MO10                                |
| SNP Position | 269331                                                |
|              | /SNP="G->A"                                           |
|              | /codon_type=Synonymous                                |
|              | /taxa=A383, A330, MO10                                |
| SNP Position | 269334                                                |
|              | /SNP="G->C"                                           |

|              |                           |
|--------------|---------------------------|
|              | /codon_type=Synonymous    |
|              | /taxa=A383, A330, MO10    |
| SNP Position | 269337                    |
|              | /SNP="C->T"               |
|              | /codon_type=Synonymous    |
|              | /taxa=A383, A330, MO10    |
| SNP Position | 269338                    |
|              | /SNP="C->T"               |
|              | /codon_type=Nonsynonymous |
|              | /taxa=A383, A330, MO10    |
| SNP Position | 269355                    |
|              | /SNP="C->T"               |
|              | /codon_type=Synonymous    |
|              | /taxa=A383, A330, MO10    |
| SNP Position | 269357                    |
|              | /SNP="C->G"               |
|              | /codon_type=Nonsynonymous |
|              | /taxa=A383, A330, MO10    |
| SNP Position | 269358                    |
|              | /SNP="T->C"               |
|              | /codon_type=Nonsynonymous |
|              | /taxa=A383, A330, MO10    |
| SNP Position | 269445                    |
|              | /SNP="C->T"               |
|              | /codon_type=Synonymous    |
|              | /taxa=A383, A330, MO10    |
| SNP Position | 269451                    |
|              | /SNP="G->T"               |
|              | /codon_type=Synonymous    |
|              | /taxa=A383, A330, MO10    |
| SNP Position | 269454                    |
|              | /SNP="T->C"               |
|              | /codon_type=Synonymous    |
|              | /taxa=A383, A330, MO10    |
| SNP Position | 269515                    |
|              | /SNP="C->T"               |
|              | /codon_type=Nonsynonymous |
|              | /taxa=A383, A330, MO10    |
| SNP Position | 269583                    |
|              | /SNP="C->T"               |
|              | /codon_type=Synonymous    |
|              | /taxa=A383, A330, MO10    |
| SNP Position | 269685                    |
|              | /SNP="G->A"               |
|              | /codon_type=Synonymous    |
|              | /taxa=A383, A330, MO10    |
| SNP Position | 269706                    |
|              | /SNP="C->T"               |
|              | /codon_type=Synonymous    |
|              | /taxa=A383, A330, MO10    |
| SNP Position | 269751                    |
|              | /SNP="C->T"               |
|              | /codon_type=Synonymous    |



|              |                        |
|--------------|------------------------|
|              | /taxa=A383, A330, MO10 |
| SNP Position | 269796                 |
|              | /SNP="C->T"            |
|              | /codon_type=Synonymous |
|              | /taxa=A383, A330, MO10 |
| SNP Position | 269814                 |
|              | /SNP="T->G"            |
|              | /codon_type=Synonymous |
|              | /taxa=A383, A330, MO10 |
| SNP Position | 269817                 |
|              | /SNP="C->T"            |
|              | /codon_type=Synonymous |
|              | /taxa=A383, A330, MO10 |
| SNP Position | 269820                 |
|              | /SNP="G->C"            |
|              | /codon_type=Synonymous |
|              | /taxa=A383, A330, MO10 |
| SNP Position | 269850                 |
|              | /SNP="C->T"            |
|              | /codon_type=Synonymous |
|              | /taxa=A383, A330, MO10 |
| SNP Position | 269877                 |
|              | /SNP="C->T"            |
|              | /codon_type=Synonymous |
|              | /taxa=A383, A330, MO10 |
| SNP Position | 269886                 |
|              | /SNP="T->C"            |
|              | /codon_type=Synonymous |
|              | /taxa=A383, A330, MO10 |
| SNP Position | 269895                 |
|              | /SNP="T->C"            |
|              | /codon_type=Synonymous |
|              | /taxa=A383, A330, MO10 |
| SNP Position | 269919                 |
|              | /SNP="G->A"            |
|              | /codon_type=Synonymous |
|              | /taxa=A383, A330, MO10 |
| SNP Position | 270093                 |
|              | /SNP="G->T"            |
|              | /codon_type=Synonymous |
|              | /taxa=A383, A330, MO10 |
| SNP Position | 270156                 |
|              | /SNP="C->G"            |
|              | /codon_type=Synonymous |
|              | /taxa=A383, A330, MO10 |
| SNP Position | 270159                 |
|              | /SNP="T->C"            |
|              | /codon_type=Synonymous |
|              | /taxa=A383, A330, MO10 |
| SNP Position | 270162                 |
|              | /SNP="C->T"            |
|              | /codon_type=Synonymous |
|              | /taxa=A383, A330, MO10 |

|              |                           |
|--------------|---------------------------|
| SNP Position | 270192                    |
|              | /SNP="C->T"               |
|              | /codon_type=Synonymous    |
|              | /taxa=A383, A330, MO10    |
| SNP Position | 270195                    |
|              | /SNP="G->A"               |
|              | /codon_type=Synonymous    |
|              | /taxa=A383, A330, MO10    |
| SNP Position | 270198                    |
|              | /SNP="T->C"               |
|              | /codon_type=Synonymous    |
|              | /taxa=A383, A330, MO10    |
| SNP Position | 270252                    |
|              | /SNP="G->T"               |
|              | /codon_type=Synonymous    |
|              | /taxa=A383, A330, MO10    |
| SNP Position | 270261                    |
|              | /SNP="C->T"               |
|              | /codon_type=Synonymous    |
|              | /taxa=A383, A330, MO10    |
| SNP Position | 270294                    |
|              | /SNP="T->C"               |
|              | /codon_type=Synonymous    |
|              | /taxa=A383, A330, MO10    |
| SNP Position | 270306                    |
|              | /SNP="G->A"               |
|              | /codon_type=Synonymous    |
|              | /taxa=A383, A330, MO10    |
| SNP Position | 270309                    |
|              | /SNP="C->G"               |
|              | /codon_type=Synonymous    |
|              | /taxa=A383, A330, MO10    |
| SNP Position | 270328                    |
|              | /SNP="A->G"               |
|              | /codon_type=Nonsynonymous |
|              | /taxa=A383, A330, MO10    |
| SNP Position | 270360                    |
|              | /SNP="T->C"               |
|              | /codon_type=Synonymous    |
|              | /taxa=A383, A330, MO10    |
| SNP Position | 270379                    |
|              | /SNP="C->T"               |
|              | /codon_type=Nonsynonymous |
|              | /taxa=A383, A330, MO10    |
| SNP Position | 270436                    |
|              | /SNP="C->G"               |
|              | /codon_type=Intergenic    |
|              | /taxa=A383, A330, MO10    |
| SNP Position | 270453                    |
|              | /SNP="A->G"               |
|              | /codon_type=Intergenic    |
|              | /taxa=A383, A330, MO10    |
| SNP Position | 270576                    |

|              |                        |
|--------------|------------------------|
|              | /SNP="G->A"            |
|              | /codon_type=Intergenic |
|              | /taxa=A383, A330, MO10 |
| SNP Position | 270595                 |
|              | /SNP="A->G"            |
|              | /codon_type=Intergenic |
|              | /taxa=A383, A330, MO10 |
| SNP Position | 270601                 |
|              | /SNP="C->T"            |
|              | /codon_type=Intergenic |
|              | /taxa=A383, A330, MO10 |
| SNP Position | 270603                 |
|              | /SNP="T->G"            |
|              | /codon_type=Intergenic |
|              | /taxa=A383, A330, MO10 |
| SNP Position | 270604                 |
|              | /SNP="T->C"            |
|              | /codon_type=Intergenic |
|              | /taxa=A383, A330, MO10 |
| SNP Position | 270656                 |
|              | /SNP="A->G"            |
|              | /codon_type=Intergenic |
|              | /taxa=A383, A330, MO10 |
| SNP Position | 270668                 |
|              | /SNP="A->T"            |
|              | /codon_type=Intergenic |
|              | /taxa=A383, A330, MO10 |
| SNP Position | 270769                 |
|              | /strand=reverse        |
|              | /SNP="C->T"            |
|              | /codon_type=Synonymous |
|              | /taxa=A383, A330, MO10 |
| SNP Position | 271057                 |
|              | /strand=reverse        |
|              | /SNP="G->A"            |
|              | /codon_type=Synonymous |
|              | /taxa=A383, A330, MO10 |
| SNP Position | 271084                 |
|              | /strand=reverse        |
|              | /SNP="C->T"            |
|              | /codon_type=Synonymous |
|              | /taxa=A383, A330, MO10 |
| SNP Position | 271093                 |
|              | /strand=reverse        |
|              | /SNP="C->T"            |
|              | /codon_type=Synonymous |
|              | /taxa=A383, A330, MO10 |
| SNP Position | 271102                 |
|              | /strand=reverse        |
|              | /SNP="T->C"            |
|              | /codon_type=Synonymous |
|              | /taxa=A383, A330, MO10 |
| SNP Position | 271105                 |

|              |                        |
|--------------|------------------------|
|              | /strand=reverse        |
|              | /SNP="T->C"            |
|              | /codon_type=Synonymous |
|              | /taxa=A383, A330, MO10 |
| SNP Position | 271144                 |
|              | /strand=reverse        |
|              | /SNP="T->C"            |
|              | /codon_type=Synonymous |
|              | /taxa=A383, A330, MO10 |
| SNP Position | 271150                 |
|              | /strand=reverse        |
|              | /SNP="A->G"            |
|              | /codon_type=Synonymous |
|              | /taxa=A383, A330, MO10 |
| SNP Position | 271159                 |
|              | /strand=reverse        |
|              | /SNP="G->A"            |
|              | /codon_type=Synonymous |
|              | /taxa=A383, A330, MO10 |
| SNP Position | 271162                 |
|              | /strand=reverse        |
|              | /SNP="A->G"            |
|              | /codon_type=Synonymous |
|              | /taxa=A383, A330, MO10 |
| SNP Position | 271390                 |
|              | /strand=reverse        |
|              | /SNP="T->C"            |
|              | /codon_type=Synonymous |
|              | /taxa=A383, A330, MO10 |
| SNP Position | 271405                 |
|              | /strand=reverse        |
|              | /SNP="G->C"            |
|              | /codon_type=Synonymous |
|              | /taxa=A383, A330, MO10 |
| SNP Position | 271528                 |
|              | /strand=reverse        |
|              | /SNP="C->T"            |
|              | /codon_type=Synonymous |
|              | /taxa=A383, A330, MO10 |
| SNP Position | 271588                 |
|              | /strand=reverse        |
|              | /SNP="G->A"            |
|              | /codon_type=Synonymous |
|              | /taxa=A383, A330, MO10 |
| SNP Position | 271623                 |
|              | /strand=reverse        |
|              | /SNP="A->G"            |
|              | /codon_type=Synonymous |
|              | /taxa=A383, A330, MO10 |
| SNP Position | 271750                 |
|              | /strand=reverse        |
|              | /SNP="A->T"            |
|              | /codon_type=Synonymous |

|              |                           |
|--------------|---------------------------|
|              | /taxa=A383, A330, MO10    |
| SNP Position | 271765                    |
|              | /strand=reverse           |
|              | /SNP="G->A"               |
|              | /codon_type=Synonymous    |
|              | /taxa=A383, A330, MO10    |
| SNP Position | 271846                    |
|              | /strand=reverse           |
|              | /SNP="T->C"               |
|              | /codon_type=Synonymous    |
|              | /taxa=A383, A330, MO10    |
| SNP Position | 271855                    |
|              | /strand=reverse           |
|              | /SNP="C->T"               |
|              | /codon_type=Synonymous    |
|              | /taxa=A383, A330, MO10    |
| SNP Position | 271938                    |
|              | /SNP="C->T"               |
|              | /codon_type=Intergenic    |
|              | /taxa=A383, A330, MO10    |
| SNP Position | 272679                    |
|              | /strand=reverse           |
|              | /SNP="T->C"               |
|              | /codon_type=Synonymous    |
|              | /taxa=A383, A330, MO10    |
| SNP Position | 272778                    |
|              | /strand=reverse           |
|              | /SNP="T->C"               |
|              | /codon_type=Nonsynonymous |
|              | /taxa=A383, A330, MO10    |
| SNP Position | 272780                    |
|              | /strand=reverse           |
|              | /SNP="C->T"               |
|              | /codon_type=Nonsynonymous |
|              | /taxa=A383, A330, MO10    |
| SNP Position | 272797                    |
|              | /strand=reverse           |
|              | /SNP="C->T"               |
|              | /codon_type=Nonsynonymous |
|              | /taxa=A383, A330, MO10    |
| SNP Position | 272865                    |
|              | /strand=reverse           |
|              | /SNP="T->C"               |
|              | /codon_type=Synonymous    |
|              | /taxa=A383, A330, MO10    |
| SNP Position | 272869                    |
|              | /strand=reverse           |
|              | /SNP="T->C"               |
|              | /codon_type=Nonsynonymous |
|              | /taxa=A383, A330, MO10    |
| SNP Position | 272871                    |
|              | /strand=reverse           |
|              | /SNP="A->G"               |

|              |                           |
|--------------|---------------------------|
|              | /codon_type=Synonymous    |
|              | /taxa=A383, A330, MO10    |
| SNP Position | 272892                    |
|              | /strand=reverse           |
|              | /SNP="G->C"               |
|              | /codon_type=Synonymous    |
|              | /taxa=A383, A330, MO10    |
| SNP Position | 272895                    |
|              | /strand=reverse           |
|              | /SNP="G->A"               |
|              | /codon_type=Synonymous    |
|              | /taxa=A383, A330, MO10    |
| SNP Position | 272898                    |
|              | /strand=reverse           |
|              | /SNP="G->A"               |
|              | /codon_type=Synonymous    |
|              | /taxa=A383, A330, MO10    |
| SNP Position | 273006                    |
|              | /strand=reverse           |
|              | /SNP="A->G"               |
|              | /codon_type=Synonymous    |
|              | /taxa=A383, A330, MO10    |
| SNP Position | 273047                    |
|              | /strand=reverse           |
|              | /SNP="G->T"               |
|              | /codon_type=Nonsynonymous |
|              | /taxa=A383, A330, MO10    |
| SNP Position | 273072                    |
|              | /strand=reverse           |
|              | /SNP="A->G"               |
|              | /codon_type=Synonymous    |
|              | /taxa=A383, A330, MO10    |
| SNP Position | 273075                    |
|              | /strand=reverse           |
|              | /SNP="G->A"               |
|              | /codon_type=Synonymous    |
|              | /taxa=A383, A330, MO10    |
| SNP Position | 273108                    |
|              | /strand=reverse           |
|              | /SNP="A->T"               |
|              | /codon_type=Synonymous    |
|              | /taxa=A383, A330, MO10    |
| SNP Position | 273120                    |
|              | /strand=reverse           |
|              | /SNP="C->A"               |
|              | /codon_type=Synonymous    |
|              | /taxa=A383, A330, MO10    |
| SNP Position | 273427                    |
|              | /strand=reverse           |
|              | /SNP="T->A"               |
|              | /codon_type=Nonsynonymous |
|              | /taxa=A383, A330, MO10    |
| SNP Position | 273817                    |

|              |                                                  |
|--------------|--------------------------------------------------|
|              | /SNP="T->C"                                      |
|              | /codon_type=Synonymous                           |
|              | /taxa=A383, A330, MO10                           |
| SNP Position | 273825                                           |
|              | /SNP="C->T"                                      |
|              | /codon_type=Synonymous                           |
|              | /taxa=A383, A330, MO10                           |
| SNP Position | 273861                                           |
|              | /SNP="A->C"                                      |
|              | /codon_type=Synonymous                           |
|              | /taxa=A383, A330, MO10                           |
| SNP Position | 273933                                           |
|              | /SNP="A->G"                                      |
|              | /codon_type=Synonymous                           |
|              | /taxa=A383, A330, MO10                           |
| SNP Position | 273939                                           |
|              | /SNP="C->T"                                      |
|              | /codon_type=Synonymous                           |
|              | /taxa=A383, A330, MO10                           |
| SNP Position | 274071                                           |
|              | /SNP="T->C"                                      |
|              | /codon_type=Synonymous                           |
|              | /taxa=A383, A330, MO10                           |
| SNP Position | 274080                                           |
|              | /SNP="C->T"                                      |
|              | /codon_type=Synonymous                           |
|              | /taxa=A383, A330, MO10                           |
| SNP Position | 276112                                           |
|              | /SNP="G->A"                                      |
|              | /codon_type=Nonsynonymous                        |
|              | /taxa=4675, 4663, 4662, A487_1, A487_2,          |
|              | CIRS101, 4679, MBN17, 2010EL_1798, 2010EL_1786,  |
|              | 2010EL_1792, IDHO1726, 4519, 4538, 4661,         |
|              | A488_2, A488_1                                   |
| SNP Position | 277737                                           |
|              | /strand=reverse                                  |
|              | /SNP="G->A"                                      |
|              | /codon_type=Synonymous                           |
|              | /taxa=A130, A131                                 |
| SNP Position | 278480                                           |
|              | /SNP="A->G"                                      |
|              | /codon_type=Nonsynonymous                        |
|              | /taxa=A4                                         |
| SNP Position | 280512                                           |
|              | /strand=reverse                                  |
|              | /SNP="G->A"                                      |
|              | /codon_type=Nonsynonymous                        |
|              | /taxa=MG116025, MG116226, 4660, 4675, 4663,      |
|              | 4662, A487_1, A487_2, CIRS101, 4679, MBN17,      |
|              | 2010EL_1798, 2010EL_1786, 2010EL_1792, IDHO1726, |
|              | 4519, 4538, 4661, A488_2, A488_1,                |
|              | PRL64, MBRN14, 4122, 4488, 4600,                 |
|              | 4585, 4536, 4623, 4605, 4593,                    |

|              |                                                  |
|--------------|--------------------------------------------------|
|              | 4552, 4551, 4642, 4656, 4646,                    |
|              | 4339, 4322, 4784, 6210, 6215,                    |
|              | 6214, 6212, 6196, 6191, 6195,                    |
|              | 6193, 6194, 6201, 6197, 6180,                    |
|              | A482, A483, A481, 7682, 7684,                    |
|              | 7687, 7685, 7686, V5, V109,                      |
|              | A130, A131, VC51, V212-1, MJ1485, MJ1236,        |
|              | A346_2, A346_1, B33, 1627, 1346, 1362,           |
|              | 4670, 4672, 4121, 4110, 4111,                    |
|              | 4113, A109, A383, A330, MO10                     |
| SNP Position | 280660                                           |
|              | /strand=reverse                                  |
|              | /SNP="C->T"                                      |
|              | /codon_type=Nonsynonymous                        |
|              | /taxa=A4                                         |
| SNP Position | 281442                                           |
|              | /strand=reverse                                  |
|              | /SNP="C->T"                                      |
|              | /codon_type=Synonymous                           |
|              | /taxa=A5, A31, A27, A185, A184,                  |
|              | A32, A177, A29, A180, A232,                      |
|              | A231, A201, A186, A200, A193,                    |
|              | A390                                             |
| SNP Position | 286337                                           |
|              | /SNP="C->T"                                      |
|              | /codon_type=Nonsynonymous                        |
|              | /taxa=A5, A31, A27, A185, A184,                  |
|              | A32, A177, A29, A180, A232,                      |
|              | A231, A201, A186, A200, A193,                    |
|              | A390                                             |
| SNP Position | 288932                                           |
|              | /SNP="G->A"                                      |
|              | /codon_type=Nonsynonymous                        |
|              | /taxa=GP152, A397, A22                           |
| SNP Position | 290017                                           |
|              | /strand=reverse                                  |
|              | /SNP="G->T"                                      |
|              | /codon_type=Nonsynonymous                        |
|              | /taxa=7682, 7684, 7687, 7685, 7686               |
| SNP Position | 295453                                           |
|              | /strand=reverse                                  |
|              | /SNP="C->T"                                      |
|              | /codon_type=Nonsynonymous                        |
|              | /taxa=PRL18                                      |
| SNP Position | 299186                                           |
|              | /strand=reverse                                  |
|              | /SNP="C->T"                                      |
|              | /codon_type=Nonsynonymous                        |
|              | /taxa=MG116025, MG116226, 4660, 4675, 4663,      |
|              | 4662, A487_1, A487_2, CIRS101, 4679, MBN17,      |
|              | 2010EL_1798, 2010EL_1786, 2010EL_1792, IDHO1726, |
|              | 4519, 4538, 4661, A488_2, A488_1,                |
|              | PRL64, MBRN14, 4122, 4488, 4600,                 |



|              |                                                  |
|--------------|--------------------------------------------------|
|              | 4585, 4536, 4623, 4605, 4593,                    |
|              | 4552, 4551, 4642, 4656, 4646,                    |
|              | 4339, 4322, 4784, 6210, 6215,                    |
|              | 6214, 6212, 6196, 6191, 6195,                    |
|              | 6193, 6194, 6201, 6197, 6180,                    |
|              | A482, A483, A481, 7682, 7684,                    |
|              | 7687, 7685, 7686, V5, V109,                      |
|              | A130, A131, VC51, V212-1, MJ1485, MJ1236,        |
|              | A346_2, A346_1, B33, 1627, 1346, 1362,           |
|              | 4670, 4672, 4121, 4110, 4111,                    |
|              | 4113, A109, A383, A330, MO10, PRL5,              |
|              | A316, A245, A241, A10                            |
| SNP Position | 301334                                           |
|              | /strand=reverse                                  |
|              | /SNP="C->T"                                      |
|              | /codon_type=Nonsynonymous                        |
|              | /taxa=A383                                       |
| SNP Position | 305404                                           |
|              | /strand=reverse                                  |
|              | /SNP="C->T"                                      |
|              | /codon_type=Nonsynonymous                        |
|              | /taxa=A4                                         |
| SNP Position | 308275                                           |
|              | /strand=reverse                                  |
|              | /SNP="A->T"                                      |
|              | /codon_type=Nonsynonymous                        |
|              | /taxa=A152                                       |
| SNP Position | 309326                                           |
|              | /strand=reverse                                  |
|              | /SNP="G->A"                                      |
|              | /codon_type=SNOP (non-stop codon to stop condon) |
|              | /taxa=A383                                       |
| SNP Position | 309509                                           |
|              | /strand=reverse                                  |
|              | /SNP="A->G"                                      |
|              | /codon_type=Nonsynonymous                        |
|              | /taxa=A4                                         |
| SNP Position | 311617                                           |
|              | /SNP="C->T"                                      |
|              | /codon_type=Nonsynonymous                        |
|              | /taxa=A4                                         |
| SNP Position | 313174                                           |
|              | /SNP="C->T"                                      |
|              | /codon_type=Nonsynonymous                        |
|              | /taxa=A4                                         |
| SNP Position | 315663                                           |
|              | /strand=reverse                                  |
|              | /SNP="A->G"                                      |
|              | /codon_type=Nonsynonymous                        |
|              | /taxa=GP152                                      |
| SNP Position | 316075                                           |
|              | /strand=reverse                                  |
|              | /SNP="T->G"                                      |

|              |                                                                                                                                                                                                                                                                                                                                                                                                                                                                                                                                                                                           |
|--------------|-------------------------------------------------------------------------------------------------------------------------------------------------------------------------------------------------------------------------------------------------------------------------------------------------------------------------------------------------------------------------------------------------------------------------------------------------------------------------------------------------------------------------------------------------------------------------------------------|
|              | /codon_type=Nonsynonymous                                                                                                                                                                                                                                                                                                                                                                                                                                                                                                                                                                 |
|              | /taxa=A397                                                                                                                                                                                                                                                                                                                                                                                                                                                                                                                                                                                |
| SNP Position | 316733                                                                                                                                                                                                                                                                                                                                                                                                                                                                                                                                                                                    |
|              | /strand=reverse                                                                                                                                                                                                                                                                                                                                                                                                                                                                                                                                                                           |
|              | /SNP="G->C"                                                                                                                                                                                                                                                                                                                                                                                                                                                                                                                                                                               |
|              | /codon_type=Nonsynonymous                                                                                                                                                                                                                                                                                                                                                                                                                                                                                                                                                                 |
|              | /taxa=A241                                                                                                                                                                                                                                                                                                                                                                                                                                                                                                                                                                                |
| SNP Position | 318779                                                                                                                                                                                                                                                                                                                                                                                                                                                                                                                                                                                    |
|              | /SNP="C->A"                                                                                                                                                                                                                                                                                                                                                                                                                                                                                                                                                                               |
|              | /codon_type=Nonsynonymous                                                                                                                                                                                                                                                                                                                                                                                                                                                                                                                                                                 |
|              | /taxa=V109                                                                                                                                                                                                                                                                                                                                                                                                                                                                                                                                                                                |
| SNP Position | 318869                                                                                                                                                                                                                                                                                                                                                                                                                                                                                                                                                                                    |
|              | /SNP="G->A"                                                                                                                                                                                                                                                                                                                                                                                                                                                                                                                                                                               |
|              | /codon_type=Nonsynonymous                                                                                                                                                                                                                                                                                                                                                                                                                                                                                                                                                                 |
|              | /taxa=A18                                                                                                                                                                                                                                                                                                                                                                                                                                                                                                                                                                                 |
| SNP Position | 318956                                                                                                                                                                                                                                                                                                                                                                                                                                                                                                                                                                                    |
|              | /SNP="C->A"                                                                                                                                                                                                                                                                                                                                                                                                                                                                                                                                                                               |
|              | /codon_type=Nonsynonymous                                                                                                                                                                                                                                                                                                                                                                                                                                                                                                                                                                 |
|              | /taxa=V212-1                                                                                                                                                                                                                                                                                                                                                                                                                                                                                                                                                                              |
| SNP Position | 318999                                                                                                                                                                                                                                                                                                                                                                                                                                                                                                                                                                                    |
|              | /SNP="C->A"                                                                                                                                                                                                                                                                                                                                                                                                                                                                                                                                                                               |
|              | /codon_type=Nonsynonymous                                                                                                                                                                                                                                                                                                                                                                                                                                                                                                                                                                 |
|              | /taxa=A245                                                                                                                                                                                                                                                                                                                                                                                                                                                                                                                                                                                |
| SNP Position | 322738                                                                                                                                                                                                                                                                                                                                                                                                                                                                                                                                                                                    |
|              | /SNP="T->A"                                                                                                                                                                                                                                                                                                                                                                                                                                                                                                                                                                               |
|              | /codon_type=Nonsynonymous                                                                                                                                                                                                                                                                                                                                                                                                                                                                                                                                                                 |
|              | /taxa=MG116025, MG116226                                                                                                                                                                                                                                                                                                                                                                                                                                                                                                                                                                  |
| SNP Position | 324131                                                                                                                                                                                                                                                                                                                                                                                                                                                                                                                                                                                    |
|              | /SNP="C->A"                                                                                                                                                                                                                                                                                                                                                                                                                                                                                                                                                                               |
|              | /codon_type=Nonsynonymous                                                                                                                                                                                                                                                                                                                                                                                                                                                                                                                                                                 |
|              | /taxa=MG116025, MG116226, 4660, 4675, 4663,<br>4662, A487_1, A487_2, CIRS101, 4679, MBN17,<br>2010EL_1798, 2010EL_1786, 2010EL_1792, IDHO1726,<br>4519, 4538, 4661, A488_2, A488_1,<br>PRL64, MBRN14, 4122, 4488, 4600,<br>4585, 4536, 4623, 4605, 4593,<br>4552, 4551, 4642, 4656, 4646,<br>4339, 4322, 4784, 6210, 6215,<br>6214, 6212, 6196, 6191, 6195,<br>6193, 6194, 6201, 6197, 6180,<br>A482, A483, A481, 7682, 7684,<br>7687, 7685, 7686, V5, V109,<br>A130, A131, VC51, V212-1, MJ1485, MJ1236,<br>A346_2, A346_1, B33, 1627, 1346, 1362,<br>4670, 4672, 4121, 4110, 4111, 4113 |
| SNP Position | 329377                                                                                                                                                                                                                                                                                                                                                                                                                                                                                                                                                                                    |
|              | /SNP="C->T"                                                                                                                                                                                                                                                                                                                                                                                                                                                                                                                                                                               |
|              | /codon_type=Intergenic                                                                                                                                                                                                                                                                                                                                                                                                                                                                                                                                                                    |
|              | /taxa=6196, 6191, 6195, 6193, 6194,<br>6201, 6197, 6180                                                                                                                                                                                                                                                                                                                                                                                                                                                                                                                                   |
| SNP Position | 329519                                                                                                                                                                                                                                                                                                                                                                                                                                                                                                                                                                                    |
|              | /SNP="G->A"                                                                                                                                                                                                                                                                                                                                                                                                                                                                                                                                                                               |
|              | /codon_type=Intergenic                                                                                                                                                                                                                                                                                                                                                                                                                                                                                                                                                                    |

|              |                                                  |
|--------------|--------------------------------------------------|
|              | /taxa=6196, 6191, 6195, 6193, 6194,              |
|              | 6201, 6197, 6180                                 |
| SNP Position | 329531                                           |
|              | /SNP="T->C"                                      |
|              | /codon_type=Intergenic                           |
|              | /taxa=6196, 6191, 6195, 6193, 6194,              |
|              | 6201, 6197, 6180                                 |
| SNP Position | 330818                                           |
|              | /strand=reverse                                  |
|              | /SNP="A->G"                                      |
|              | /codon_type=Synonymous                           |
|              | /taxa=A482, A483, A481, 7682, 7684,              |
|              | 7687, 7685, 7686                                 |
| SNP Position | 332538                                           |
|              | /SNP="G->A"                                      |
|              | /codon_type=Nonsynonymous                        |
|              | /taxa=A4                                         |
| SNP Position | 332701                                           |
|              | /SNP="C->T"                                      |
|              | /codon_type=Synonymous                           |
|              | /taxa=A152, A155, A154                           |
| SNP Position | 333332                                           |
|              | /SNP="C->A"                                      |
|              | /codon_type=Nonsynonymous                        |
|              | /taxa=B33, 1627, 1346, 1362                      |
| SNP Position | 335337                                           |
|              | /SNP="G->A"                                      |
|              | /codon_type=Synonymous                           |
|              | /taxa=B33                                        |
| SNP Position | 335660                                           |
|              | /SNP="C->G"                                      |
|              | /codon_type=Nonsynonymous                        |
|              | /taxa=N16961                                     |
| SNP Position | 336613                                           |
|              | /SNP="G->A"                                      |
|              | /codon_type=Intergenic                           |
|              | /taxa=MG116025, MG116226, 4660, 4675, 4663,      |
|              | 4662, A487_1, A487_2, CIRS101, 4679, MBN17,      |
|              | 2010EL_1798, 2010EL_1786, 2010EL_1792, IDHO1726, |
|              | 4519, 4538, 4661, A488_2, A488_1,                |
|              | PRL64, MBRN14, 4122, 4488, 4600,                 |
|              | 4585, 4536, 4623, 4605, 4593,                    |
|              | 4552, 4551, 4642, 4656, 4646,                    |
|              | 4339, 4322, 4784, 6210, 6215,                    |
|              | 6214, 6212, 6196, 6191, 6195,                    |
|              | 6193, 6194, 6201, 6197, 6180,                    |
|              | A482, A483, A481, 7682, 7684,                    |
|              | 7687, 7685, 7686, V5, V109,                      |
|              | A130, A131, VC51, V212-1, MJ1485, MJ1236,        |
|              | A346_2, A346_1, B33, 1627, 1346, 1362,           |
|              | 4670, 4672, 4121, 4110, 4111,                    |
|              | 4113, A109, A383, A330, MO10, PRL5,              |
|              | A316                                             |

|              |                                                    |
|--------------|----------------------------------------------------|
| SNP Position | 342932                                             |
|              | /SNP="C->G"                                        |
|              | /codon_type=Nonsynonymous                          |
|              | /taxa=PRL18                                        |
| SNP Position | 342966                                             |
|              | /SNP="C->T"                                        |
|              | /codon_type=Nonsynonymous                          |
|              | /taxa=GP140                                        |
| SNP Position | 343122                                             |
|              | /SNP="T->C"                                        |
|              | /codon_type=Nonsynonymous                          |
|              | /taxa=PRL5                                         |
| SNP Position | 347027                                             |
|              | /SNP="C->T"                                        |
|              | /codon_type=Nonsynonymous                          |
|              | /taxa=A4                                           |
| SNP Position | 347722                                             |
|              | /SNP="C->T"                                        |
|              | /codon_type=Synonymous                             |
|              | /taxa=MG116025, MG116226, 4660, 4675, 4663,        |
|              | 4662, A487_1, A487_2, CIRS101, 4679, MBN17,        |
|              | 2010EL_1798, 2010EL_1786, 2010EL_1792, IDHO1726,   |
|              | 4519, 4538, 4661, A488_2, A488_1,                  |
|              | PRL64, MBRN14, 4122, 4488, 4600,                   |
|              | 4585, 4536, 4623, 4605, 4593,                      |
|              | 4552, 4551, 4642, 4656, 4646,                      |
|              | 4339, 4322, 4784, 6210, 6215,                      |
|              | 6214, 6212, 6196, 6191, 6195,                      |
|              | 6193, 6194, 6201, 6197, 6180,                      |
|              | A482, A483, A481, 7682, 7684,                      |
|              | 7687, 7685, 7686, V5, V109,                        |
|              | A130, A131, VC51, V212-1, MJ1485, MJ1236,          |
|              | A346_2, A346_1, B33, 1627, 1346, 1362,             |
|              | 4670, 4672, 4121, 4110, 4111,                      |
|              | 4113, A109, A383, A330, MO10, PRL5,                |
|              | A316, A245, A241, A10, GP140, RC9,                 |
|              | GP143, GP152, A397, A22, GP60, N16961,             |
|              | A19                                                |
| SNP Position | 348480                                             |
|              | /SNP="A->T"                                        |
|              | /codon_type=Nonsynonymous                          |
|              | /taxa=GP143                                        |
| SNP Position | 349029                                             |
|              | /strand=reverse                                    |
|              | /SNP="T->G"                                        |
|              | /homoplasy=convergence with branch leading to 4605 |
|              | /codon_type=Nonsynonymous                          |
|              | /taxa=4488                                         |
| SNP Position | 349029                                             |
|              | /strand=reverse                                    |
|              | /SNP="T->G"                                        |
|              | /homoplasy=convergence with branch leading to 4488 |
|              | /codon_type=Nonsynonymous                          |

|              |                                              |
|--------------|----------------------------------------------|
|              | /taxa=4605                                   |
| SNP Position | 349049                                       |
|              | /strand=reverse                              |
|              | /SNP="C->T"                                  |
|              | /codon_type=Nonsynonymous                    |
|              | /taxa=4552                                   |
| SNP Position | 358817                                       |
|              | /strand=reverse                              |
|              | /SNP="C->T"                                  |
|              | /codon_type=Synonymous                       |
|              | /taxa=B33, 1627, 1346, 1362                  |
| SNP Position | 364550                                       |
|              | /strand=reverse                              |
|              | /SNP="C->A"                                  |
|              | /codon_type=Nonsynonymous                    |
|              | /taxa=A31, A27, A185, A184, A32,             |
|              | A177, A29, A180, A232, A231,                 |
|              | A201, A186, A200, A193, A390                 |
| SNP Position | 367158                                       |
|              | /SNP="A->G"                                  |
|              | /codon_type=Nonsynonymous                    |
|              | /taxa=A4                                     |
| SNP Position | 368120                                       |
|              | /SNP="T->C"                                  |
|              | /codon_type=Nonsynonymous                    |
|              | /taxa=4679, MBN17, 2010EL_1798, 2010EL_1786, |
|              | 2010EL_1792, IDHO1726, 4519, 4538            |
| SNP Position | 376379                                       |
|              | /SNP="C->T"                                  |
|              | /codon_type=Intergenic                       |
|              | /taxa=A5, A31, A27, A185, A184,              |
|              | A32, A177, A29, A180, A232,                  |
|              | A231, A201, A186, A200, A193,                |
|              | A390                                         |
| SNP Position | 378700                                       |
|              | /SNP="A->G"                                  |
|              | /codon_type=Synonymous                       |
|              | /taxa=A232, A231                             |
| SNP Position | 381631                                       |
|              | /SNP="A->G"                                  |
|              | /codon_type=Nonsynonymous                    |
|              | /taxa=M66, A6                                |
| SNP Position | 385154                                       |
|              | /SNP="A->C"                                  |
|              | /codon_type=Nonsynonymous                    |
|              | /taxa=1627                                   |
| SNP Position | 388326                                       |
|              | /SNP="G->A"                                  |
|              | /codon_type=Synonymous                       |
|              | /taxa=4784                                   |
| SNP Position | 400120                                       |
|              | /SNP="T->G"                                  |
|              | /codon_type=Nonsynonymous                    |

|              |                                                                                                                                                                                                                                                                                                                                                                                                                                                                                                                                                                                                                                                             |
|--------------|-------------------------------------------------------------------------------------------------------------------------------------------------------------------------------------------------------------------------------------------------------------------------------------------------------------------------------------------------------------------------------------------------------------------------------------------------------------------------------------------------------------------------------------------------------------------------------------------------------------------------------------------------------------|
|              | /taxa=A10                                                                                                                                                                                                                                                                                                                                                                                                                                                                                                                                                                                                                                                   |
| SNP Position | 401064                                                                                                                                                                                                                                                                                                                                                                                                                                                                                                                                                                                                                                                      |
|              | /SNP="A->G"                                                                                                                                                                                                                                                                                                                                                                                                                                                                                                                                                                                                                                                 |
|              | /codon_type=Synonymous                                                                                                                                                                                                                                                                                                                                                                                                                                                                                                                                                                                                                                      |
|              | /taxa=GP143                                                                                                                                                                                                                                                                                                                                                                                                                                                                                                                                                                                                                                                 |
| SNP Position | 401111                                                                                                                                                                                                                                                                                                                                                                                                                                                                                                                                                                                                                                                      |
|              | /SNP="A->G"                                                                                                                                                                                                                                                                                                                                                                                                                                                                                                                                                                                                                                                 |
|              | /codon_type=Nonsynonymous                                                                                                                                                                                                                                                                                                                                                                                                                                                                                                                                                                                                                                   |
|              | /taxa=A4                                                                                                                                                                                                                                                                                                                                                                                                                                                                                                                                                                                                                                                    |
| SNP Position | 401736                                                                                                                                                                                                                                                                                                                                                                                                                                                                                                                                                                                                                                                      |
|              | /SNP="A->C"                                                                                                                                                                                                                                                                                                                                                                                                                                                                                                                                                                                                                                                 |
|              | /homoplasy=convergence with branch leading to A6                                                                                                                                                                                                                                                                                                                                                                                                                                                                                                                                                                                                            |
|              | /codon_type=Intergenic                                                                                                                                                                                                                                                                                                                                                                                                                                                                                                                                                                                                                                      |
|              | /taxa=7682, 7684, 7687, 7685, 7686                                                                                                                                                                                                                                                                                                                                                                                                                                                                                                                                                                                                                          |
| SNP Position | 401736                                                                                                                                                                                                                                                                                                                                                                                                                                                                                                                                                                                                                                                      |
|              | /SNP="A->C"                                                                                                                                                                                                                                                                                                                                                                                                                                                                                                                                                                                                                                                 |
|              | /homoplasy=convergence with branch leading to 107                                                                                                                                                                                                                                                                                                                                                                                                                                                                                                                                                                                                           |
|              | /codon_type=Intergenic                                                                                                                                                                                                                                                                                                                                                                                                                                                                                                                                                                                                                                      |
|              | /taxa=A6                                                                                                                                                                                                                                                                                                                                                                                                                                                                                                                                                                                                                                                    |
| SNP Position | 406901                                                                                                                                                                                                                                                                                                                                                                                                                                                                                                                                                                                                                                                      |
|              | /SNP="C->T"                                                                                                                                                                                                                                                                                                                                                                                                                                                                                                                                                                                                                                                 |
|              | /codon_type=Intergenic                                                                                                                                                                                                                                                                                                                                                                                                                                                                                                                                                                                                                                      |
|              | /taxa=A245, A241                                                                                                                                                                                                                                                                                                                                                                                                                                                                                                                                                                                                                                            |
| SNP Position | 406984                                                                                                                                                                                                                                                                                                                                                                                                                                                                                                                                                                                                                                                      |
|              | /SNP="T->C"                                                                                                                                                                                                                                                                                                                                                                                                                                                                                                                                                                                                                                                 |
|              | /homoplasy=reversal from branch leading to 127                                                                                                                                                                                                                                                                                                                                                                                                                                                                                                                                                                                                              |
|              | /codon_type=Intergenic                                                                                                                                                                                                                                                                                                                                                                                                                                                                                                                                                                                                                                      |
|              | /taxa=CIRS101, 4679, MBN17, 2010EL_1798,<br>2010EL_1786, 2010EL_1792, IDHO1726, 4519, 4538                                                                                                                                                                                                                                                                                                                                                                                                                                                                                                                                                                  |
| SNP Position | 406984                                                                                                                                                                                                                                                                                                                                                                                                                                                                                                                                                                                                                                                      |
|              | /SNP="C->T"                                                                                                                                                                                                                                                                                                                                                                                                                                                                                                                                                                                                                                                 |
|              | /homoplasy=reversed in branch leading to 20                                                                                                                                                                                                                                                                                                                                                                                                                                                                                                                                                                                                                 |
|              | /codon_type=Intergenic                                                                                                                                                                                                                                                                                                                                                                                                                                                                                                                                                                                                                                      |
|              | /taxa=MG116025, MG116226, 4660, 4675, 4663,<br>4662, A487_1, A487_2, CIRS101, 4679, MBN17,<br>2010EL_1798, 2010EL_1786, 2010EL_1792, IDHO1726,<br>4519, 4538, 4661, A488_2, A488_1,<br>PRL64, MBRN14, 4122, 4488, 4600,<br>4585, 4536, 4623, 4605, 4593,<br>4552, 4551, 4642, 4656, 4646,<br>4339, 4322, 4784, 6210, 6215,<br>6214, 6212, 6196, 6191, 6195,<br>6193, 6194, 6201, 6197, 6180,<br>A482, A483, A481, 7682, 7684,<br>7687, 7685, 7686, V5, V109,<br>A130, A131, VC51, V212-1, MJ1485, MJ1236,<br>A346_2, A346_1, B33, 1627, 1346, 1362,<br>4670, 4672, 4121, 4110, 4111,<br>4113, A109, A383, A330, MO10, PRL5,<br>A316, A245, A241, A10, GP140 |
| SNP Position | 417150                                                                                                                                                                                                                                                                                                                                                                                                                                                                                                                                                                                                                                                      |
|              | /strand=reverse                                                                                                                                                                                                                                                                                                                                                                                                                                                                                                                                                                                                                                             |
|              | /SNP="C->T"                                                                                                                                                                                                                                                                                                                                                                                                                                                                                                                                                                                                                                                 |

|              |                                                 |
|--------------|-------------------------------------------------|
|              | /codon_type=Nonsynonymous                       |
|              | /taxa=A4                                        |
| SNP Position | 418775                                          |
|              | /strand=reverse                                 |
|              | /SNP="G->A"                                     |
|              | /codon_type=Synonymous                          |
|              | /taxa=A482, A483, A481, 7682, 7684,             |
|              | 7687, 7685, 7686                                |
| SNP Position | 424778                                          |
|              | /SNP="G->A"                                     |
|              | /codon_type=Nonsynonymous                       |
|              | /taxa=A6                                        |
| SNP Position | 426049                                          |
|              | /SNP="C->T"                                     |
|              | /codon_type=Synonymous                          |
|              | /taxa=6210, 6215, 6214, 6212                    |
| SNP Position | 427292                                          |
|              | /SNP="A->G"                                     |
|              | /codon_type=Nonsynonymous                       |
|              | /taxa=4660, 4675, 4663, 4662, A487_1,           |
|              | A487_2, CIRS101, 4679, MBN17, 2010EL_1798,      |
|              | 2010EL_1786, 2010EL_1792, IDHO1726, 4519, 4538, |
|              | 4661, A488_2, A488_1, PRL64, MBRN14,            |
|              | 4122, 4488, 4600, 4585, 4536,                   |
|              | 4623, 4605, 4593, 4552, 4551,                   |
|              | 4642, 4656, 4646, 4339, 4322,                   |
|              | 4784, 6210, 6215, 6214, 6212,                   |
|              | 6196, 6191, 6195, 6193, 6194,                   |
|              | 6201, 6197, 6180, A482, A483,                   |
|              | A481, 7682, 7684, 7687, 7685,                   |
|              | 7686                                            |
| SNP Position | 429679                                          |
|              | /SNP="G->A"                                     |
|              | /codon_type=Synonymous                          |
|              | /taxa=A4                                        |
| SNP Position | 430898                                          |
|              | /SNP="C->T"                                     |
|              | /codon_type=Nonsynonymous                       |
|              | /taxa=6196, 6191, 6195, 6193, 6194,             |
|              | 6201, 6197, 6180                                |
| SNP Position | 432681                                          |
|              | /SNP="G->A"                                     |
|              | /codon_type=Nonsynonymous                       |
|              | /taxa=4660, 4675, 4663, 4662, A487_1,           |
|              | A487_2, CIRS101, 4679, MBN17, 2010EL_1798,      |
|              | 2010EL_1786, 2010EL_1792, IDHO1726, 4519, 4538, |
|              | 4661, A488_2, A488_1, PRL64, MBRN14,            |
|              | 4122, 4488, 4600, 4585, 4536,                   |
|              | 4623, 4605, 4593, 4552, 4551,                   |
|              | 4642, 4656, 4646, 4339, 4322,                   |
|              | 4784, 6210, 6215, 6214, 6212,                   |
|              | 6196, 6191, 6195, 6193, 6194,                   |
|              | 6201, 6197, 6180, A482, A483,                   |

|              |                                                    |
|--------------|----------------------------------------------------|
|              | A481, 7682, 7684, 7687, 7685,                      |
|              | 7686                                               |
| SNP Position | 437712                                             |
|              | /SNP="G->T"                                        |
|              | /codon_type=SNOP (non-stop codon to stop condon)   |
|              | /taxa=MJ1485, MJ1236                               |
| SNP Position | 442222                                             |
|              | /SNP="C->T"                                        |
|              | /codon_type=Nonsynonymous                          |
|              | /taxa=4538                                         |
| SNP Position | 442375                                             |
|              | /SNP="C->A"                                        |
|              | /codon_type=Nonsynonymous                          |
|              | /taxa=A10                                          |
| SNP Position | 442531                                             |
|              | /SNP="A->C"                                        |
|              | /homoplasy=convergence with branch leading to 4605 |
|              | /codon_type=Nonsynonymous                          |
|              | /taxa=4536                                         |
| SNP Position | 442531                                             |
|              | /SNP="A->C"                                        |
|              | /homoplasy=convergence with branch leading to 4536 |
|              | /codon_type=Nonsynonymous                          |
|              | /taxa=4605                                         |
| SNP Position | 442603                                             |
|              | /SNP="G->A"                                        |
|              | /codon_type=Nonsynonymous                          |
|              | /taxa=4623                                         |
| SNP Position | 442641                                             |
|              | /SNP="G->T"                                        |
|              | /codon_type=Nonsynonymous                          |
|              | /taxa=4551                                         |
| SNP Position | 442755                                             |
|              | /SNP="T->A"                                        |
|              | /codon_type=Nonsynonymous                          |
|              | /taxa=GP143                                        |
| SNP Position | 442807                                             |
|              | /SNP="A->C"                                        |
|              | /codon_type=Nonsynonymous                          |
|              | /taxa=4322                                         |
| SNP Position | 443048                                             |
|              | /SNP="C->T"                                        |
|              | /codon_type=Nonsynonymous                          |
|              | /taxa=GP145, GP160, GP106                          |
| SNP Position | 443117                                             |
|              | /SNP="C->T"                                        |
|              | /codon_type=Nonsynonymous                          |
|              | /taxa=A4                                           |
| SNP Position | 444125                                             |
|              | /SNP="A->G"                                        |
|              | /codon_type=Synonymous                             |
|              | /taxa=4784                                         |
| SNP Position | 451218                                             |



|              |                                                                                                                                                                                                                                                                                                                                                                                                                                                                                                                                                                                                                                                      |
|--------------|------------------------------------------------------------------------------------------------------------------------------------------------------------------------------------------------------------------------------------------------------------------------------------------------------------------------------------------------------------------------------------------------------------------------------------------------------------------------------------------------------------------------------------------------------------------------------------------------------------------------------------------------------|
|              | /SNP="C->T"                                                                                                                                                                                                                                                                                                                                                                                                                                                                                                                                                                                                                                          |
|              | /codon_type=SNOP (non-stop codon to stop condon)                                                                                                                                                                                                                                                                                                                                                                                                                                                                                                                                                                                                     |
|              | /taxa=4672                                                                                                                                                                                                                                                                                                                                                                                                                                                                                                                                                                                                                                           |
| SNP Position | 452426                                                                                                                                                                                                                                                                                                                                                                                                                                                                                                                                                                                                                                               |
|              | /SNP="G->T"                                                                                                                                                                                                                                                                                                                                                                                                                                                                                                                                                                                                                                          |
|              | /codon_type=Nonsynonymous                                                                                                                                                                                                                                                                                                                                                                                                                                                                                                                                                                                                                            |
|              | /taxa=4111, 4113                                                                                                                                                                                                                                                                                                                                                                                                                                                                                                                                                                                                                                     |
| SNP Position | 454454                                                                                                                                                                                                                                                                                                                                                                                                                                                                                                                                                                                                                                               |
|              | /SNP="T->A"                                                                                                                                                                                                                                                                                                                                                                                                                                                                                                                                                                                                                                          |
|              | /codon_type=Intergenic                                                                                                                                                                                                                                                                                                                                                                                                                                                                                                                                                                                                                               |
|              | /taxa=MG116025, MG116226                                                                                                                                                                                                                                                                                                                                                                                                                                                                                                                                                                                                                             |
| SNP Position | 456918                                                                                                                                                                                                                                                                                                                                                                                                                                                                                                                                                                                                                                               |
|              | /strand=reverse                                                                                                                                                                                                                                                                                                                                                                                                                                                                                                                                                                                                                                      |
|              | /SNP="G->A"                                                                                                                                                                                                                                                                                                                                                                                                                                                                                                                                                                                                                                          |
|              | /codon_type=Nonsynonymous                                                                                                                                                                                                                                                                                                                                                                                                                                                                                                                                                                                                                            |
|              | /taxa=GP152                                                                                                                                                                                                                                                                                                                                                                                                                                                                                                                                                                                                                                          |
| SNP Position | 458366                                                                                                                                                                                                                                                                                                                                                                                                                                                                                                                                                                                                                                               |
|              | /strand=reverse                                                                                                                                                                                                                                                                                                                                                                                                                                                                                                                                                                                                                                      |
|              | /SNP="T->C"                                                                                                                                                                                                                                                                                                                                                                                                                                                                                                                                                                                                                                          |
|              | /codon_type=Nonsynonymous                                                                                                                                                                                                                                                                                                                                                                                                                                                                                                                                                                                                                            |
|              | /taxa=A4                                                                                                                                                                                                                                                                                                                                                                                                                                                                                                                                                                                                                                             |
| SNP Position | 460404                                                                                                                                                                                                                                                                                                                                                                                                                                                                                                                                                                                                                                               |
|              | /strand=reverse                                                                                                                                                                                                                                                                                                                                                                                                                                                                                                                                                                                                                                      |
|              | /SNP="C->T"                                                                                                                                                                                                                                                                                                                                                                                                                                                                                                                                                                                                                                          |
|              | /codon_type=Nonsynonymous                                                                                                                                                                                                                                                                                                                                                                                                                                                                                                                                                                                                                            |
|              | /taxa=4121, 4110                                                                                                                                                                                                                                                                                                                                                                                                                                                                                                                                                                                                                                     |
| SNP Position | 463919                                                                                                                                                                                                                                                                                                                                                                                                                                                                                                                                                                                                                                               |
|              | /SNP="G->A"                                                                                                                                                                                                                                                                                                                                                                                                                                                                                                                                                                                                                                          |
|              | /codon_type=SNOP (non-stop codon to stop condon)                                                                                                                                                                                                                                                                                                                                                                                                                                                                                                                                                                                                     |
|              | /taxa=MG116025, MG116226, 4660, 4675, 4663,<br>4662, A487_1, A487_2, CIRS101, 4679, MBN17,<br>2010EL_1798, 2010EL_1786, 2010EL_1792, IDHO1726,<br>4519, 4538, 4661, A488_2, A488_1,<br>PRL64, MBRN14, 4122, 4488, 4600,<br>4585, 4536, 4623, 4605, 4593,<br>4552, 4551, 4642, 4656, 4646,<br>4339, 4322, 4784, 6210, 6215,<br>6214, 6212, 6196, 6191, 6195,<br>6193, 6194, 6201, 6197, 6180,<br>A482, A483, A481, 7682, 7684,<br>7687, 7685, 7686, V5, V109,<br>A130, A131, VC51, V212-1, MJ1485, MJ1236,<br>A346_2, A346_1, B33, 1627, 1346, 1362,<br>4670, 4672, 4121, 4110, 4111,<br>4113, A109, A383, A330, MO10, PRL5,<br>A316, A245, A241, A10 |
| SNP Position | 466599                                                                                                                                                                                                                                                                                                                                                                                                                                                                                                                                                                                                                                               |
|              | /SNP="T->A"                                                                                                                                                                                                                                                                                                                                                                                                                                                                                                                                                                                                                                          |
|              | /codon_type=Synonymous                                                                                                                                                                                                                                                                                                                                                                                                                                                                                                                                                                                                                               |
|              | /taxa=MG116025, MG116226, 4660, 4675, 4663,<br>4662, A487_1, A487_2, CIRS101, 4679, MBN17,<br>2010EL_1798, 2010EL_1786, 2010EL_1792, IDHO1726,<br>4519, 4538, 4661, A488_2, A488_1,                                                                                                                                                                                                                                                                                                                                                                                                                                                                  |

|              |                                             |
|--------------|---------------------------------------------|
|              | PRL64, MBRN14, 4122, 4488, 4600,            |
|              | 4585, 4536, 4623, 4605, 4593,               |
|              | 4552, 4551, 4642, 4656, 4646,               |
|              | 4339, 4322, 4784, 6210, 6215,               |
|              | 6214, 6212, 6196, 6191, 6195,               |
|              | 6193, 6194, 6201, 6197, 6180,               |
|              | A482, A483, A481, 7682, 7684,               |
|              | 7687, 7685, 7686, V5, V109,                 |
|              | A130, A131, VC51, V212-1, MJ1485, MJ1236,   |
|              | A346_2, A346_1, B33, 1627, 1346, 1362,      |
|              | 4670, 4672, 4121, 4110, 4111,               |
|              | 4113, A109, A383, A330, MO10, PRL5,         |
|              | A316, A245, A241, A10, GP140                |
| SNP Position | 468203                                      |
|              | /SNP="C->A"                                 |
|              | /codon_type=Synonymous                      |
|              | /taxa=4600, 4585                            |
| SNP Position | 472377                                      |
|              | /strand=reverse                             |
|              | /SNP="C->T"                                 |
|              | /codon_type=Nonsynonymous                   |
|              | /taxa=V5                                    |
| SNP Position | 481917                                      |
|              | /strand=reverse                             |
|              | /SNP="C->T"                                 |
|              | /codon_type=Synonymous                      |
|              | /taxa=B33, 1627, 1346, 1362                 |
| SNP Position | 482966                                      |
|              | /strand=reverse                             |
|              | /SNP="G->A"                                 |
|              | /codon_type=Synonymous                      |
|              | /taxa=VC51, V212-1, MJ1485, MJ1236, A346_2, |
|              | A346_1, B33, 1627, 1346, 1362, 4670,        |
|              | 4672, 4121, 4110, 4111, 4113                |
| SNP Position | 483690                                      |
|              | /strand=reverse                             |
|              | /SNP="G->A"                                 |
|              | /codon_type=Synonymous                      |
|              | /taxa=4121, 4110                            |
| SNP Position | 484014                                      |
|              | /strand=reverse                             |
|              | /SNP="G->A"                                 |
|              | /codon_type=Synonymous                      |
|              | /taxa=RC9                                   |
| SNP Position | 484916                                      |
|              | /SNP="T->C"                                 |
|              | /codon_type=Nonsynonymous                   |
|              | /taxa=A4                                    |
| SNP Position | 489366                                      |
|              | /strand=reverse                             |
|              | /SNP="C->T"                                 |
|              | /codon_type=Synonymous                      |
|              | /taxa=A152, A155, A154                      |

|              |                                                  |
|--------------|--------------------------------------------------|
| SNP Position | 490184                                           |
|              | /strand=reverse                                  |
|              | /SNP="C->T"                                      |
|              | /codon_type=Nonsynonymous                        |
|              | /taxa=A4                                         |
| SNP Position | 491911                                           |
|              | /SNP="C->A"                                      |
|              | /codon_type=Nonsynonymous                        |
|              | /taxa=MO10                                       |
| SNP Position | 501928                                           |
|              | /SNP="C->T"                                      |
|              | /codon_type=Synonymous                           |
|              | /taxa=GP143                                      |
| SNP Position | 508073                                           |
|              | /SNP="G->A"                                      |
|              | /codon_type=Synonymous                           |
|              | /taxa=4675                                       |
| SNP Position | 514443                                           |
|              | /SNP="C->T"                                      |
|              | /codon_type=Intergenic                           |
|              | /taxa=4672                                       |
| SNP Position | 515075                                           |
|              | /strand=reverse                                  |
|              | /SNP="G->T"                                      |
|              | /codon_type=Nonsynonymous                        |
|              | /taxa=4111                                       |
| SNP Position | 515554                                           |
|              | /strand=reverse                                  |
|              | /SNP="A->G"                                      |
|              | /codon_type=Synonymous                           |
|              | /taxa=A4                                         |
| SNP Position | 519739                                           |
|              | /strand=reverse                                  |
|              | /SNP="T->C"                                      |
|              | /codon_type=Synonymous                           |
|              | /taxa=A4                                         |
| SNP Position | 521838                                           |
|              | /SNP="T->A"                                      |
|              | /codon_type=Intergenic                           |
|              | /taxa=A31, A27, A185, A184, A32,                 |
|              | A177, A29, A180, A232, A231,                     |
|              | A201, A186, A200, A193, A390                     |
| SNP Position | 522136                                           |
|              | /strand=reverse                                  |
|              | /SNP="C->A"                                      |
|              | /codon_type=SNOP (non-stop codon to stop condon) |
|              | /taxa=A5, A31, A27, A185, A184,                  |
|              | A32, A177, A29, A180, A232,                      |
|              | A231, A201, A186, A200, A193,                    |
|              | A390, GP145, GP160, GP106                        |
| SNP Position | 522155                                           |
|              | /strand=reverse                                  |
|              | /SNP="G->A"                                      |

|              |                                                                                                                                                    |
|--------------|----------------------------------------------------------------------------------------------------------------------------------------------------|
|              | /codon_type=Synonymous                                                                                                                             |
|              | /taxa=A4                                                                                                                                           |
| SNP Position | 522866                                                                                                                                             |
|              | /SNP="T->C"                                                                                                                                        |
|              | /codon_type=Intergenic                                                                                                                             |
|              | /taxa=4536                                                                                                                                         |
| SNP Position | 524293                                                                                                                                             |
|              | /strand=reverse                                                                                                                                    |
|              | /SNP="G->A"                                                                                                                                        |
|              | /codon_type=Synonymous                                                                                                                             |
|              | /taxa=4670                                                                                                                                         |
| SNP Position | 525542                                                                                                                                             |
|              | /strand=reverse                                                                                                                                    |
|              | /SNP="A->G"                                                                                                                                        |
|              | /codon_type=Nonsynonymous                                                                                                                          |
|              | /taxa=A397                                                                                                                                         |
| SNP Position | 526320                                                                                                                                             |
|              | /strand=reverse                                                                                                                                    |
|              | /SNP="A->G"                                                                                                                                        |
|              | /codon_type=Nonsynonymous                                                                                                                          |
|              | /taxa=A482, A483, A481, 7682, 7684,<br>7687, 7685, 7686                                                                                            |
| SNP Position | 529129                                                                                                                                             |
|              | /SNP="A->T"                                                                                                                                        |
|              | /codon_type=Nonsynonymous                                                                                                                          |
|              | /taxa=4663, 4662, A487_1, A487_2, CIRS101,<br>4679, MBN17, 2010EL_1798, 2010EL_1786, 2010EL_1792,<br>IDHO1726, 4519, 4538, 4661, A488_2,<br>A488_1 |
| SNP Position | 530265                                                                                                                                             |
|              | /SNP="T->C"                                                                                                                                        |
|              | /codon_type=Nonsynonymous                                                                                                                          |
|              | /taxa=VC51, V212-1, MJ1485, MJ1236, A346_2,<br>A346_1, B33, 1627, 1346, 1362, 4670,<br>4672, 4121, 4110, 4111, 4113                                |
| SNP Position | 532392                                                                                                                                             |
|              | /SNP="G->A"                                                                                                                                        |
|              | /codon_type=Intergenic                                                                                                                             |
|              | /taxa=A152, A155, A154                                                                                                                             |
| SNP Position | 532440                                                                                                                                             |
|              | /SNP="T->C"                                                                                                                                        |
|              | /codon_type=Intergenic                                                                                                                             |
|              | /taxa=MBRN14, 4122, 4488, 4600, 4585,<br>4536, 4623, 4605, 4593, 4552,<br>4551, 4642, 4656, 4646, 4339, 4322                                       |
| SNP Position | 532441                                                                                                                                             |
|              | /SNP="C->T"                                                                                                                                        |
|              | /codon_type=Intergenic                                                                                                                             |
|              | /taxa=MBRN14, 4122, 4488, 4600, 4585,<br>4536, 4623, 4605, 4593, 4552,<br>4551, 4642, 4656, 4646, 4339, 4322                                       |
| SNP Position | 532443                                                                                                                                             |
|              | /SNP="G->A"                                                                                                                                        |

|              |                                       |
|--------------|---------------------------------------|
|              | /codon_type=Intergenic                |
|              | /taxa=MBRN14, 4122, 4488, 4600, 4585, |
|              | 4536, 4623, 4605, 4593, 4552,         |
|              | 4551, 4642, 4656, 4646, 4339, 4322    |
| SNP Position | 532447                                |
|              | /SNP="G->A"                           |
|              | /codon_type=Intergenic                |
|              | /taxa=MBRN14, 4122, 4488, 4600, 4585, |
|              | 4536, 4623, 4605, 4593, 4552,         |
|              | 4551, 4642, 4656, 4646, 4339, 4322    |
| SNP Position | 535382                                |
|              | /SNP="G->A"                           |
|              | /codon_type=Intergenic                |
|              | /taxa=6210, 6215, 6214, 6212, 6196,   |
|              | 6191, 6195, 6193, 6194, 6201,         |
|              | 6197, 6180                            |
| SNP Position | 537406                                |
|              | /strand=reverse                       |
|              | /SNP="C->T"                           |
|              | /codon_type=Synonymous                |
|              | /taxa=A245, A241                      |
| SNP Position | 537808                                |
|              | /strand=reverse                       |
|              | /SNP="C->T"                           |
|              | /codon_type=Synonymous                |
|              | /taxa=A5, A31, A27, A185, A184,       |
|              | A32, A177, A29, A180, A232,           |
|              | A231, A201, A186, A200, A193,         |
|              | A390                                  |
| SNP Position | 537817                                |
|              | /strand=reverse                       |
|              | /SNP="C->A"                           |
|              | /codon_type=Synonymous                |
|              | /taxa=A5, A31, A27, A185, A184,       |
|              | A32, A177, A29, A180, A232,           |
|              | A231, A201, A186, A200, A193,         |
|              | A390                                  |
| SNP Position | 537826                                |
|              | /strand=reverse                       |
|              | /SNP="T->C"                           |
|              | /codon_type=Synonymous                |
|              | /taxa=A5, A31, A27, A185, A184,       |
|              | A32, A177, A29, A180, A232,           |
|              | A231, A201, A186, A200, A193,         |
|              | A390                                  |
| SNP Position | 537845                                |
|              | /strand=reverse                       |
|              | /SNP="T->C"                           |
|              | /codon_type=Nonsynonymous             |
|              | /taxa=A5, A31, A27, A185, A184,       |
|              | A32, A177, A29, A180, A232,           |
|              | A231, A201, A186, A200, A193,         |
|              | A390                                  |

|              |                                 |
|--------------|---------------------------------|
| SNP Position | 537853                          |
|              | /strand=reverse                 |
|              | /SNP="A->G"                     |
|              | /codon_type=Synonymous          |
|              | /taxa=A5, A31, A27, A185, A184, |
|              | A32, A177, A29, A180, A232,     |
|              | A231, A201, A186, A200, A193,   |
|              | A390                            |
| SNP Position | 537859                          |
|              | /strand=reverse                 |
|              | /SNP="A->C"                     |
|              | /codon_type=Synonymous          |
|              | /taxa=A5, A31, A27, A185, A184, |
|              | A32, A177, A29, A180, A232,     |
|              | A231, A201, A186, A200, A193,   |
|              | A390                            |
| SNP Position | 537869                          |
|              | /strand=reverse                 |
|              | /SNP="A->G"                     |
|              | /codon_type=Nonsynonymous       |
|              | /taxa=A5, A31, A27, A185, A184, |
|              | A32, A177, A29, A180, A232,     |
|              | A231, A201, A186, A200, A193,   |
|              | A390                            |
| SNP Position | 537871                          |
|              | /strand=reverse                 |
|              | /SNP="C->A"                     |
|              | /codon_type=Synonymous          |
|              | /taxa=A5, A31, A27, A185, A184, |
|              | A32, A177, A29, A180, A232,     |
|              | A231, A201, A186, A200, A193,   |
|              | A390                            |
| SNP Position | 537883                          |
|              | /strand=reverse                 |
|              | /SNP="T->G"                     |
|              | /codon_type=Synonymous          |
|              | /taxa=A5, A31, A27, A185, A184, |
|              | A32, A177, A29, A180, A232,     |
|              | A231, A201, A186, A200, A193,   |
|              | A390                            |
| SNP Position | 537893                          |
|              | /strand=reverse                 |
|              | /SNP="T->G"                     |
|              | /codon_type=Nonsynonymous       |
|              | /taxa=A5, A31, A27, A185, A184, |
|              | A32, A177, A29, A180, A232,     |
|              | A231, A201, A186, A200, A193,   |
|              | A390                            |
| SNP Position | 537916                          |
|              | /strand=reverse                 |
|              | /SNP="A->G"                     |
|              | /codon_type=Nonsynonymous       |
|              | /taxa=A5, A31, A27, A185, A184, |

|              |                                 |
|--------------|---------------------------------|
|              | A32, A177, A29, A180, A232,     |
|              | A231, A201, A186, A200, A193,   |
|              | A390                            |
| SNP Position | 537917                          |
|              | /strand=reverse                 |
|              | /SNP="G->C"                     |
|              | /codon_type=Nonsynonymous       |
|              | /taxa=A5, A31, A27, A185, A184, |
|              | A32, A177, A29, A180, A232,     |
|              | A231, A201, A186, A200, A193,   |
|              | A390                            |
| SNP Position | 537928                          |
|              | /strand=reverse                 |
|              | /SNP="T->C"                     |
|              | /codon_type=Synonymous          |
|              | /taxa=A5, A31, A27, A185, A184, |
|              | A32, A177, A29, A180, A232,     |
|              | A231, A201, A186, A200, A193,   |
|              | A390                            |
| SNP Position | 537953                          |
|              | /strand=reverse                 |
|              | /SNP="G->C"                     |
|              | /codon_type=Nonsynonymous       |
|              | /taxa=A5, A31, A27, A185, A184, |
|              | A32, A177, A29, A180, A232,     |
|              | A231, A201, A186, A200, A193,   |
|              | A390                            |
| SNP Position | 537954                          |
|              | /strand=reverse                 |
|              | /SNP="A->G"                     |
|              | /codon_type=Nonsynonymous       |
|              | /taxa=A5, A31, A27, A185, A184, |
|              | A32, A177, A29, A180, A232,     |
|              | A231, A201, A186, A200, A193,   |
|              | A390                            |
| SNP Position | 537955                          |
|              | /strand=reverse                 |
|              | /SNP="C->A"                     |
|              | /codon_type=Synonymous          |
|              | /taxa=A5, A31, A27, A185, A184, |
|              | A32, A177, A29, A180, A232,     |
|              | A231, A201, A186, A200, A193,   |
|              | A390                            |
| SNP Position | 537985                          |
|              | /strand=reverse                 |
|              | /SNP="T->A"                     |
|              | /codon_type=Synonymous          |
|              | /taxa=A5, A31, A27, A185, A184, |
|              | A32, A177, A29, A180, A232,     |
|              | A231, A201, A186, A200, A193,   |
|              | A390                            |
| SNP Position | 537991                          |
|              | /strand=reverse                 |

|              |                                 |
|--------------|---------------------------------|
|              | /SNP="T->C"                     |
|              | /codon_type=Synonymous          |
|              | /taxa=A5, A31, A27, A185, A184, |
|              | A32, A177, A29, A180, A232,     |
|              | A231, A201, A186, A200, A193,   |
|              | A390                            |
| SNP Position | 537994                          |
|              | /strand=reverse                 |
|              | /SNP="T->C"                     |
|              | /codon_type=Synonymous          |
|              | /taxa=A5, A31, A27, A185, A184, |
|              | A32, A177, A29, A180, A232,     |
|              | A231, A201, A186, A200, A193,   |
|              | A390                            |
| SNP Position | 538009                          |
|              | /strand=reverse                 |
|              | /SNP="C->A"                     |
|              | /codon_type=Synonymous          |
|              | /taxa=A5, A31, A27, A185, A184, |
|              | A32, A177, A29, A180, A232,     |
|              | A231, A201, A186, A200, A193,   |
|              | A390                            |
| SNP Position | 538066                          |
|              | /strand=reverse                 |
|              | /SNP="G->C"                     |
|              | /codon_type=Synonymous          |
|              | /taxa=A5, A31, A27, A185, A184, |
|              | A32, A177, A29, A180, A232,     |
|              | A231, A201, A186, A200, A193,   |
|              | A390                            |
| SNP Position | 538099                          |
|              | /strand=reverse                 |
|              | /SNP="C->T"                     |
|              | /codon_type=Synonymous          |
|              | /taxa=A5, A31, A27, A185, A184, |
|              | A32, A177, A29, A180, A232,     |
|              | A231, A201, A186, A200, A193,   |
|              | A390                            |
| SNP Position | 538114                          |
|              | /strand=reverse                 |
|              | /SNP="C->G"                     |
|              | /codon_type=Nonsynonymous       |
|              | /taxa=A5, A31, A27, A185, A184, |
|              | A32, A177, A29, A180, A232,     |
|              | A231, A201, A186, A200, A193,   |
|              | A390                            |
| SNP Position | 538125                          |
|              | /strand=reverse                 |
|              | /SNP="C->T"                     |
|              | /codon_type=Nonsynonymous       |
|              | /taxa=A5, A31, A27, A185, A184, |
|              | A32, A177, A29, A180, A232,     |
|              | A231, A201, A186, A200, A193,   |



|              |                                 |
|--------------|---------------------------------|
|              | A390                            |
| SNP Position | 538126                          |
|              | /strand=reverse                 |
|              | /SNP="T->G"                     |
|              | /codon_type=Nonsynonymous       |
|              | /taxa=A5, A31, A27, A185, A184, |
|              | A32, A177, A29, A180, A232,     |
|              | A231, A201, A186, A200, A193,   |
|              | A390                            |
| SNP Position | 538216                          |
|              | /strand=reverse                 |
|              | /SNP="G->A"                     |
|              | /codon_type=Synonymous          |
|              | /taxa=A5, A31, A27, A185, A184, |
|              | A32, A177, A29, A180, A232,     |
|              | A231, A201, A186, A200, A193,   |
|              | A390                            |
| SNP Position | 538243                          |
|              | /strand=reverse                 |
|              | /SNP="A->C"                     |
|              | /codon_type=Synonymous          |
|              | /taxa=A5, A31, A27, A185, A184, |
|              | A32, A177, A29, A180, A232,     |
|              | A231, A201, A186, A200, A193,   |
|              | A390                            |
| SNP Position | 538389                          |
|              | /SNP="T->C"                     |
|              | /codon_type=Intergenic          |
|              | /taxa=A5, A31, A27, A185, A184, |
|              | A32, A177, A29, A180, A232,     |
|              | A231, A201, A186, A200, A193,   |
|              | A390                            |
| SNP Position | 538395                          |
|              | /SNP="A->G"                     |
|              | /codon_type=Intergenic          |
|              | /taxa=A5, A31, A27, A185, A184, |
|              | A32, A177, A29, A180, A232,     |
|              | A231, A201, A186, A200, A193,   |
|              | A390                            |
| SNP Position | 538402                          |
|              | /SNP="C->T"                     |
|              | /codon_type=Intergenic          |
|              | /taxa=A5, A31, A27, A185, A184, |
|              | A32, A177, A29, A180, A232,     |
|              | A231, A201, A186, A200, A193,   |
|              | A390                            |
| SNP Position | 538433                          |
|              | /strand=reverse                 |
|              | /SNP="T->C"                     |
|              | /codon_type=Nonsynonymous       |
|              | /taxa=A5, A31, A27, A185, A184, |
|              | A32, A177, A29, A180, A232,     |
|              | A231, A201, A186, A200, A193,   |

|              |                                 |
|--------------|---------------------------------|
|              | A390                            |
| SNP Position | 538453                          |
|              | /strand=reverse                 |
|              | /SNP="A->T"                     |
|              | /codon_type=Nonsynonymous       |
|              | /taxa=A5, A31, A27, A185, A184, |
|              | A32, A177, A29, A180, A232,     |
|              | A231, A201, A186, A200, A193,   |
|              | A390                            |
| SNP Position | 538454                          |
|              | /strand=reverse                 |
|              | /SNP="G->T"                     |
|              | /codon_type=Nonsynonymous       |
|              | /taxa=A5, A31, A27, A185, A184, |
|              | A32, A177, A29, A180, A232,     |
|              | A231, A201, A186, A200, A193,   |
|              | A390                            |
| SNP Position | 538458                          |
|              | /strand=reverse                 |
|              | /SNP="T->C"                     |
|              | /codon_type=Nonsynonymous       |
|              | /taxa=A5, A31, A27, A185, A184, |
|              | A32, A177, A29, A180, A232,     |
|              | A231, A201, A186, A200, A193,   |
|              | A390                            |
| SNP Position | 538486                          |
|              | /strand=reverse                 |
|              | /SNP="C->T"                     |
|              | /codon_type=Synonymous          |
|              | /taxa=A5, A31, A27, A185, A184, |
|              | A32, A177, A29, A180, A232,     |
|              | A231, A201, A186, A200, A193,   |
|              | A390                            |
| SNP Position | 538502                          |
|              | /strand=reverse                 |
|              | /SNP="G->C"                     |
|              | /codon_type=Nonsynonymous       |
|              | /taxa=A5, A31, A27, A185, A184, |
|              | A32, A177, A29, A180, A232,     |
|              | A231, A201, A186, A200, A193,   |
|              | A390                            |
| SNP Position | 538510                          |
|              | /strand=reverse                 |
|              | /SNP="A->G"                     |
|              | /codon_type=Synonymous          |
|              | /taxa=A5, A31, A27, A185, A184, |
|              | A32, A177, A29, A180, A232,     |
|              | A231, A201, A186, A200, A193,   |
|              | A390                            |
| SNP Position | 538522                          |
|              | /strand=reverse                 |
|              | /SNP="G->A"                     |
|              | /codon_type=Synonymous          |

|              |                                 |
|--------------|---------------------------------|
|              | /taxa=A5, A31, A27, A185, A184, |
|              | A32, A177, A29, A180, A232,     |
|              | A231, A201, A186, A200, A193,   |
|              | A390                            |
| SNP Position | 538531                          |
|              | /strand=reverse                 |
|              | /SNP="T->C"                     |
|              | /codon_type=Synonymous          |
|              | /taxa=A5, A31, A27, A185, A184, |
|              | A32, A177, A29, A180, A232,     |
|              | A231, A201, A186, A200, A193,   |
|              | A390                            |
| SNP Position | 538534                          |
|              | /strand=reverse                 |
|              | /SNP="A->G"                     |
|              | /codon_type=Synonymous          |
|              | /taxa=A5, A31, A27, A185, A184, |
|              | A32, A177, A29, A180, A232,     |
|              | A231, A201, A186, A200, A193,   |
|              | A390                            |
| SNP Position | 538552                          |
|              | /strand=reverse                 |
|              | /SNP="A->G"                     |
|              | /codon_type=Synonymous          |
|              | /taxa=A5, A31, A27, A185, A184, |
|              | A32, A177, A29, A180, A232,     |
|              | A231, A201, A186, A200, A193,   |
|              | A390                            |
| SNP Position | 538566                          |
|              | /strand=reverse                 |
|              | /SNP="T->C"                     |
|              | /codon_type=Nonsynonymous       |
|              | /taxa=A5, A31, A27, A185, A184, |
|              | A32, A177, A29, A180, A232,     |
|              | A231, A201, A186, A200, A193,   |
|              | A390                            |
| SNP Position | 538603                          |
|              | /SNP="T->C"                     |
|              | /codon_type=Intergenic          |
|              | /taxa=A5, A31, A27, A185, A184, |
|              | A32, A177, A29, A180, A232,     |
|              | A231, A201, A186, A200, A193,   |
|              | A390                            |
| SNP Position | 538611                          |
|              | /strand=reverse                 |
|              | /SNP="C->G"                     |
|              | /codon_type=Nonsynonymous       |
|              | /taxa=A5, A31, A27, A185, A184, |
|              | A32, A177, A29, A180, A232,     |
|              | A231, A201, A186, A200, A193,   |
|              | A390                            |
| SNP Position | 538612                          |
|              | /strand=reverse                 |

|              |                                 |
|--------------|---------------------------------|
|              | /SNP="A->G"                     |
|              | /codon_type=Synonymous          |
|              | /taxa=A5, A31, A27, A185, A184, |
|              | A32, A177, A29, A180, A232,     |
|              | A231, A201, A186, A200, A193,   |
|              | A390                            |
| SNP Position | 538617                          |
|              | /strand=reverse                 |
|              | /SNP="T->C"                     |
|              | /codon_type=Nonsynonymous       |
|              | /taxa=A5, A31, A27, A185, A184, |
|              | A32, A177, A29, A180, A232,     |
|              | A231, A201, A186, A200, A193,   |
|              | A390                            |
| SNP Position | 538640                          |
|              | /strand=reverse                 |
|              | /SNP="A->G"                     |
|              | /codon_type=Nonsynonymous       |
|              | /taxa=A5, A31, A27, A185, A184, |
|              | A32, A177, A29, A180, A232,     |
|              | A231, A201, A186, A200, A193,   |
|              | A390                            |
| SNP Position | 538645                          |
|              | /strand=reverse                 |
|              | /SNP="A->G"                     |
|              | /codon_type=Synonymous          |
|              | /taxa=A5, A31, A27, A185, A184, |
|              | A32, A177, A29, A180, A232,     |
|              | A231, A201, A186, A200, A193,   |
|              | A390                            |
| SNP Position | 538654                          |
|              | /strand=reverse                 |
|              | /SNP="A->C"                     |
|              | /codon_type=Synonymous          |
|              | /taxa=A5, A31, A27, A185, A184, |
|              | A32, A177, A29, A180, A232,     |
|              | A231, A201, A186, A200, A193,   |
|              | A390                            |
| SNP Position | 538664                          |
|              | /strand=reverse                 |
|              | /SNP="C->T"                     |
|              | /codon_type=Nonsynonymous       |
|              | /taxa=A5, A31, A27, A185, A184, |
|              | A32, A177, A29, A180, A232,     |
|              | A231, A201, A186, A200, A193,   |
|              | A390                            |
| SNP Position | 538702                          |
|              | /strand=reverse                 |
|              | /SNP="A->T"                     |
|              | /codon_type=Synonymous          |
|              | /taxa=A5, A31, A27, A185, A184, |
|              | A32, A177, A29, A180, A232,     |
|              | A231, A201, A186, A200, A193,   |

|              |                                 |
|--------------|---------------------------------|
|              | A390                            |
| SNP Position | 538708                          |
|              | /strand=reverse                 |
|              | /SNP="C->T"                     |
|              | /codon_type=Nonsynonymous       |
|              | /taxa=A5, A31, A27, A185, A184, |
|              | A32, A177, A29, A180, A232,     |
|              | A231, A201, A186, A200, A193,   |
|              | A390                            |
| SNP Position | 538744                          |
|              | /strand=reverse                 |
|              | /SNP="T->C"                     |
|              | /codon_type=Synonymous          |
|              | /taxa=A5, A31, A27, A185, A184, |
|              | A32, A177, A29, A180, A232,     |
|              | A231, A201, A186, A200, A193,   |
|              | A390                            |
| SNP Position | 538792                          |
|              | /strand=reverse                 |
|              | /SNP="A->G"                     |
|              | /codon_type=Synonymous          |
|              | /taxa=A5, A31, A27, A185, A184, |
|              | A32, A177, A29, A180, A232,     |
|              | A231, A201, A186, A200, A193,   |
|              | A390                            |
| SNP Position | 538795                          |
|              | /strand=reverse                 |
|              | /SNP="C->A"                     |
|              | /codon_type=Synonymous          |
|              | /taxa=A5, A31, A27, A185, A184, |
|              | A32, A177, A29, A180, A232,     |
|              | A231, A201, A186, A200, A193,   |
|              | A390                            |
| SNP Position | 538828                          |
|              | /strand=reverse                 |
|              | /SNP="A->G"                     |
|              | /codon_type=Synonymous          |
|              | /taxa=A5, A31, A27, A185, A184, |
|              | A32, A177, A29, A180, A232,     |
|              | A231, A201, A186, A200, A193,   |
|              | A390                            |
| SNP Position | 538837                          |
|              | /strand=reverse                 |
|              | /SNP="C->T"                     |
|              | /codon_type=Synonymous          |
|              | /taxa=A5, A31, A27, A185, A184, |
|              | A32, A177, A29, A180, A232,     |
|              | A231, A201, A186, A200, A193,   |
|              | A390                            |
| SNP Position | 538858                          |
|              | /strand=reverse                 |
|              | /SNP="C->T"                     |
|              | /codon_type=Synonymous          |

|              |                                 |
|--------------|---------------------------------|
|              | /taxa=A5, A31, A27, A185, A184, |
|              | A32, A177, A29, A180, A232,     |
|              | A231, A201, A186, A200, A193,   |
|              | A390                            |
| SNP Position | 538952                          |
|              | /strand=reverse                 |
|              | /SNP="C->T"                     |
|              | /codon_type=Nonsynonymous       |
|              | /taxa=A5, A31, A27, A185, A184, |
|              | A32, A177, A29, A180, A232,     |
|              | A231, A201, A186, A200, A193,   |
|              | A390                            |
| SNP Position | 538963                          |
|              | /strand=reverse                 |
|              | /SNP="A->G"                     |
|              | /codon_type=Synonymous          |
|              | /taxa=A5, A31, A27, A185, A184, |
|              | A32, A177, A29, A180, A232,     |
|              | A231, A201, A186, A200, A193,   |
|              | A390                            |
| SNP Position | 538974                          |
|              | /strand=reverse                 |
|              | /SNP="G->A"                     |
|              | /codon_type=Nonsynonymous       |
|              | /taxa=A5, A31, A27, A185, A184, |
|              | A32, A177, A29, A180, A232,     |
|              | A231, A201, A186, A200, A193,   |
|              | A390                            |
| SNP Position | 538976                          |
|              | /strand=reverse                 |
|              | /SNP="T->C"                     |
|              | /codon_type=Nonsynonymous       |
|              | /taxa=A5, A31, A27, A185, A184, |
|              | A32, A177, A29, A180, A232,     |
|              | A231, A201, A186, A200, A193,   |
|              | A390                            |
| SNP Position | 538981                          |
|              | /strand=reverse                 |
|              | /SNP="A->G"                     |
|              | /codon_type=Synonymous          |
|              | /taxa=A5, A31, A27, A185, A184, |
|              | A32, A177, A29, A180, A232,     |
|              | A231, A201, A186, A200, A193,   |
|              | A390                            |
| SNP Position | 538986                          |
|              | /strand=reverse                 |
|              | /SNP="A->G"                     |
|              | /codon_type=Synonymous          |
|              | /taxa=A5, A31, A27, A185, A184, |
|              | A32, A177, A29, A180, A232,     |
|              | A231, A201, A186, A200, A193,   |
|              | A390                            |
| SNP Position | 539019                          |

|              |                                 |
|--------------|---------------------------------|
|              | /strand=reverse                 |
|              | /SNP="A->T"                     |
|              | /codon_type=Nonsynonymous       |
|              | /taxa=A5, A31, A27, A185, A184, |
|              | A32, A177, A29, A180, A232,     |
|              | A231, A201, A186, A200, A193,   |
|              | A390                            |
| SNP Position | 539020                          |
|              | /strand=reverse                 |
|              | /SNP="T->G"                     |
|              | /codon_type=Synonymous          |
|              | /taxa=A5, A31, A27, A185, A184, |
|              | A32, A177, A29, A180, A232,     |
|              | A231, A201, A186, A200, A193,   |
|              | A390                            |
| SNP Position | 539025                          |
|              | /strand=reverse                 |
|              | /SNP="C->T"                     |
|              | /codon_type=Nonsynonymous       |
|              | /taxa=A5, A31, A27, A185, A184, |
|              | A32, A177, A29, A180, A232,     |
|              | A231, A201, A186, A200, A193,   |
|              | A390                            |
| SNP Position | 539106                          |
|              | /strand=reverse                 |
|              | /SNP="C->T"                     |
|              | /codon_type=Synonymous          |
|              | /taxa=A5, A31, A27, A185, A184, |
|              | A32, A177, A29, A180, A232,     |
|              | A231, A201, A186, A200, A193,   |
|              | A390                            |
| SNP Position | 539130                          |
|              | /strand=reverse                 |
|              | /SNP="G->A"                     |
|              | /codon_type=Synonymous          |
|              | /taxa=A5, A31, A27, A185, A184, |
|              | A32, A177, A29, A180, A232,     |
|              | A231, A201, A186, A200, A193,   |
|              | A390                            |
| SNP Position | 539141                          |
|              | /strand=reverse                 |
|              | /SNP="C->G"                     |
|              | /codon_type=Nonsynonymous       |
|              | /taxa=A5, A31, A27, A185, A184, |
|              | A32, A177, A29, A180, A232,     |
|              | A231, A201, A186, A200, A193,   |
|              | A390                            |
| SNP Position | 539178                          |
|              | /strand=reverse                 |
|              | /SNP="G->T"                     |
|              | /codon_type=Synonymous          |
|              | /taxa=A5, A31, A27, A185, A184, |
|              | A32, A177, A29, A180, A232,     |

|              |                                 |
|--------------|---------------------------------|
|              | A231, A201, A186, A200, A193,   |
|              | A390                            |
| SNP Position | 539190                          |
|              | /strand=reverse                 |
|              | /SNP="C->T"                     |
|              | /codon_type=Synonymous          |
|              | /taxa=A5, A31, A27, A185, A184, |
|              | A32, A177, A29, A180, A232,     |
|              | A231, A201, A186, A200, A193,   |
|              | A390                            |
| SNP Position | 539196                          |
|              | /strand=reverse                 |
|              | /SNP="T->A"                     |
|              | /codon_type=Synonymous          |
|              | /taxa=A5, A31, A27, A185, A184, |
|              | A32, A177, A29, A180, A232,     |
|              | A231, A201, A186, A200, A193,   |
|              | A390                            |
| SNP Position | 539199                          |
|              | /strand=reverse                 |
|              | /SNP="C->T"                     |
|              | /codon_type=Synonymous          |
|              | /taxa=A5, A31, A27, A185, A184, |
|              | A32, A177, A29, A180, A232,     |
|              | A231, A201, A186, A200, A193,   |
|              | A390                            |
| SNP Position | 539217                          |
|              | /strand=reverse                 |
|              | /SNP="A->C"                     |
|              | /codon_type=Synonymous          |
|              | /taxa=A5, A31, A27, A185, A184, |
|              | A32, A177, A29, A180, A232,     |
|              | A231, A201, A186, A200, A193,   |
|              | A390                            |
| SNP Position | 539220                          |
|              | /strand=reverse                 |
|              | /SNP="A->G"                     |
|              | /codon_type=Synonymous          |
|              | /taxa=A5, A31, A27, A185, A184, |
|              | A32, A177, A29, A180, A232,     |
|              | A231, A201, A186, A200, A193,   |
|              | A390                            |
| SNP Position | 539226                          |
|              | /strand=reverse                 |
|              | /SNP="C->T"                     |
|              | /codon_type=Synonymous          |
|              | /taxa=A5, A31, A27, A185, A184, |
|              | A32, A177, A29, A180, A232,     |
|              | A231, A201, A186, A200, A193,   |
|              | A390                            |
| SNP Position | 539277                          |
|              | /strand=reverse                 |
|              | /SNP="T->C"                     |



|              |                                 |
|--------------|---------------------------------|
|              | /codon_type=Synonymous          |
|              | /taxa=A5, A31, A27, A185, A184, |
|              | A32, A177, A29, A180, A232,     |
|              | A231, A201, A186, A200, A193,   |
|              | A390                            |
| SNP Position | 539283                          |
|              | /strand=reverse                 |
|              | /SNP="G->A"                     |
|              | /codon_type=Synonymous          |
|              | /taxa=A5, A31, A27, A185, A184, |
|              | A32, A177, A29, A180, A232,     |
|              | A231, A201, A186, A200, A193,   |
|              | A390                            |
| SNP Position | 539293                          |
|              | /strand=reverse                 |
|              | /SNP="T->C"                     |
|              | /codon_type=Nonsynonymous       |
|              | /taxa=A5, A31, A27, A185, A184, |
|              | A32, A177, A29, A180, A232,     |
|              | A231, A201, A186, A200, A193,   |
|              | A390                            |
| SNP Position | 539307                          |
|              | /strand=reverse                 |
|              | /SNP="A->T"                     |
|              | /codon_type=Synonymous          |
|              | /taxa=A5, A31, A27, A185, A184, |
|              | A32, A177, A29, A180, A232,     |
|              | A231, A201, A186, A200, A193,   |
|              | A390                            |
| SNP Position | 539328                          |
|              | /strand=reverse                 |
|              | /SNP="C->T"                     |
|              | /codon_type=Synonymous          |
|              | /taxa=A5, A31, A27, A185, A184, |
|              | A32, A177, A29, A180, A232,     |
|              | A231, A201, A186, A200, A193,   |
|              | A390                            |
| SNP Position | 539348                          |
|              | /strand=reverse                 |
|              | /SNP="T->C"                     |
|              | /codon_type=Nonsynonymous       |
|              | /taxa=A5, A31, A27, A185, A184, |
|              | A32, A177, A29, A180, A232,     |
|              | A231, A201, A186, A200, A193,   |
|              | A390                            |
| SNP Position | 539355                          |
|              | /strand=reverse                 |
|              | /SNP="A->T"                     |
|              | /codon_type=Synonymous          |
|              | /taxa=A5, A31, A27, A185, A184, |
|              | A32, A177, A29, A180, A232,     |
|              | A231, A201, A186, A200, A193,   |
|              | A390                            |

|              |                                 |
|--------------|---------------------------------|
| SNP Position | 539363                          |
|              | /strand=reverse                 |
|              | /SNP="G->A"                     |
|              | /codon_type=Nonsynonymous       |
|              | /taxa=A5, A31, A27, A185, A184, |
|              | A32, A177, A29, A180, A232,     |
|              | A231, A201, A186, A200, A193,   |
|              | A390                            |
| SNP Position | 539373                          |
|              | /strand=reverse                 |
|              | /SNP="A->T"                     |
|              | /codon_type=Synonymous          |
|              | /taxa=A5, A31, A27, A185, A184, |
|              | A32, A177, A29, A180, A232,     |
|              | A231, A201, A186, A200, A193,   |
|              | A390                            |
| SNP Position | 539382                          |
|              | /strand=reverse                 |
|              | /SNP="T->C"                     |
|              | /codon_type=Synonymous          |
|              | /taxa=A5, A31, A27, A185, A184, |
|              | A32, A177, A29, A180, A232,     |
|              | A231, A201, A186, A200, A193,   |
|              | A390                            |
| SNP Position | 539426                          |
|              | /strand=reverse                 |
|              | /SNP="A->G"                     |
|              | /codon_type=Synonymous          |
|              | /taxa=A5, A31, A27, A185, A184, |
|              | A32, A177, A29, A180, A232,     |
|              | A231, A201, A186, A200, A193,   |
|              | A390                            |
| SNP Position | 539427                          |
|              | /strand=reverse                 |
|              | /SNP="C->T"                     |
|              | /codon_type=Synonymous          |
|              | /taxa=A5, A31, A27, A185, A184, |
|              | A32, A177, A29, A180, A232,     |
|              | A231, A201, A186, A200, A193,   |
|              | A390                            |
| SNP Position | 539436                          |
|              | /strand=reverse                 |
|              | /SNP="T->C"                     |
|              | /codon_type=Synonymous          |
|              | /taxa=A5, A31, A27, A185, A184, |
|              | A32, A177, A29, A180, A232,     |
|              | A231, A201, A186, A200, A193,   |
|              | A390                            |
| SNP Position | 539445                          |
|              | /strand=reverse                 |
|              | /SNP="A->C"                     |
|              | /codon_type=Nonsynonymous       |
|              | /taxa=A5, A31, A27, A185, A184, |

|              |                                 |
|--------------|---------------------------------|
|              | A32, A177, A29, A180, A232,     |
|              | A231, A201, A186, A200, A193,   |
|              | A390                            |
| SNP Position | 539468                          |
|              | /strand=reverse                 |
|              | /SNP="G->A"                     |
|              | /codon_type=Synonymous          |
|              | /taxa=A5, A31, A27, A185, A184, |
|              | A32, A177, A29, A180, A232,     |
|              | A231, A201, A186, A200, A193,   |
|              | A390                            |
| SNP Position | 539474                          |
|              | /strand=reverse                 |
|              | /SNP="C->A"                     |
|              | /codon_type=Nonsynonymous       |
|              | /taxa=A5, A31, A27, A185, A184, |
|              | A32, A177, A29, A180, A232,     |
|              | A231, A201, A186, A200, A193,   |
|              | A390                            |
| SNP Position | 539484                          |
|              | /strand=reverse                 |
|              | /SNP="C->T"                     |
|              | /codon_type=Nonsynonymous       |
|              | /taxa=A5, A31, A27, A185, A184, |
|              | A32, A177, A29, A180, A232,     |
|              | A231, A201, A186, A200, A193,   |
|              | A390                            |
| SNP Position | 539486                          |
|              | /strand=reverse                 |
|              | /SNP="A->T"                     |
|              | /codon_type=Nonsynonymous       |
|              | /taxa=A5, A31, A27, A185, A184, |
|              | A32, A177, A29, A180, A232,     |
|              | A231, A201, A186, A200, A193,   |
|              | A390                            |
| SNP Position | 539496                          |
|              | /strand=reverse                 |
|              | /SNP="A->G"                     |
|              | /codon_type=Synonymous          |
|              | /taxa=A5, A31, A27, A185, A184, |
|              | A32, A177, A29, A180, A232,     |
|              | A231, A201, A186, A200, A193,   |
|              | A390                            |
| SNP Position | 539517                          |
|              | /strand=reverse                 |
|              | /SNP="A->G"                     |
|              | /codon_type=Synonymous          |
|              | /taxa=A5, A31, A27, A185, A184, |
|              | A32, A177, A29, A180, A232,     |
|              | A231, A201, A186, A200, A193,   |
|              | A390                            |
| SNP Position | 539561                          |
|              | /strand=reverse                 |

|              |                                 |
|--------------|---------------------------------|
|              | /SNP="G->A"                     |
|              | /codon_type=Synonymous          |
|              | /taxa=A5, A31, A27, A185, A184, |
|              | A32, A177, A29, A180, A232,     |
|              | A231, A201, A186, A200, A193,   |
|              | A390                            |
| SNP Position | 539564                          |
|              | /strand=reverse                 |
|              | /SNP="G->A"                     |
|              | /codon_type=Synonymous          |
|              | /taxa=A5, A31, A27, A185, A184, |
|              | A32, A177, A29, A180, A232,     |
|              | A231, A201, A186, A200, A193,   |
|              | A390                            |
| SNP Position | 539570                          |
|              | /strand=reverse                 |
|              | /SNP="G->A"                     |
|              | /codon_type=Synonymous          |
|              | /taxa=A5, A31, A27, A185, A184, |
|              | A32, A177, A29, A180, A232,     |
|              | A231, A201, A186, A200, A193,   |
|              | A390                            |
| SNP Position | 539576                          |
|              | /strand=reverse                 |
|              | /SNP="C->G"                     |
|              | /codon_type=Synonymous          |
|              | /taxa=A5, A31, A27, A185, A184, |
|              | A32, A177, A29, A180, A232,     |
|              | A231, A201, A186, A200, A193,   |
|              | A390                            |
| SNP Position | 539597                          |
|              | /strand=reverse                 |
|              | /SNP="A->G"                     |
|              | /codon_type=Synonymous          |
|              | /taxa=A5, A31, A27, A185, A184, |
|              | A32, A177, A29, A180, A232,     |
|              | A231, A201, A186, A200, A193,   |
|              | A390                            |
| SNP Position | 539617                          |
|              | /strand=reverse                 |
|              | /SNP="T->C"                     |
|              | /codon_type=Nonsynonymous       |
|              | /taxa=A5, A31, A27, A185, A184, |
|              | A32, A177, A29, A180, A232,     |
|              | A231, A201, A186, A200, A193,   |
|              | A390                            |
| SNP Position | 539618                          |
|              | /strand=reverse                 |
|              | /SNP="A->G"                     |
|              | /codon_type=Synonymous          |
|              | /taxa=A5, A31, A27, A185, A184, |
|              | A32, A177, A29, A180, A232,     |
|              | A231, A201, A186, A200, A193,   |

|              |                                 |
|--------------|---------------------------------|
|              | A390                            |
| SNP Position | 539621                          |
|              | /strand=reverse                 |
|              | /SNP="T->C"                     |
|              | /codon_type=Synonymous          |
|              | /taxa=A5, A31, A27, A185, A184, |
|              | A32, A177, A29, A180, A232,     |
|              | A231, A201, A186, A200, A193,   |
|              | A390                            |
| SNP Position | 539633                          |
|              | /strand=reverse                 |
|              | /SNP="T->A"                     |
|              | /codon_type=Synonymous          |
|              | /taxa=A5, A31, A27, A185, A184, |
|              | A32, A177, A29, A180, A232,     |
|              | A231, A201, A186, A200, A193,   |
|              | A390                            |
| SNP Position | 539639                          |
|              | /strand=reverse                 |
|              | /SNP="T->G"                     |
|              | /codon_type=Synonymous          |
|              | /taxa=A5, A31, A27, A185, A184, |
|              | A32, A177, A29, A180, A232,     |
|              | A231, A201, A186, A200, A193,   |
|              | A390                            |
| SNP Position | 539657                          |
|              | /strand=reverse                 |
|              | /SNP="T->C"                     |
|              | /codon_type=Synonymous          |
|              | /taxa=A5, A31, A27, A185, A184, |
|              | A32, A177, A29, A180, A232,     |
|              | A231, A201, A186, A200, A193,   |
|              | A390                            |
| SNP Position | 539669                          |
|              | /strand=reverse                 |
|              | /SNP="T->A"                     |
|              | /codon_type=Synonymous          |
|              | /taxa=A5, A31, A27, A185, A184, |
|              | A32, A177, A29, A180, A232,     |
|              | A231, A201, A186, A200, A193,   |
|              | A390                            |
| SNP Position | 539672                          |
|              | /strand=reverse                 |
|              | /SNP="A->G"                     |
|              | /codon_type=Synonymous          |
|              | /taxa=A5, A31, A27, A185, A184, |
|              | A32, A177, A29, A180, A232,     |
|              | A231, A201, A186, A200, A193,   |
|              | A390                            |
| SNP Position | 539699                          |
|              | /strand=reverse                 |
|              | /SNP="T->C"                     |
|              | /codon_type=Synonymous          |

|              |                                 |
|--------------|---------------------------------|
|              | /taxa=A5, A31, A27, A185, A184, |
|              | A32, A177, A29, A180, A232,     |
|              | A231, A201, A186, A200, A193,   |
|              | A390                            |
| SNP Position | 539723                          |
|              | /strand=reverse                 |
|              | /SNP="C->T"                     |
|              | /codon_type=Synonymous          |
|              | /taxa=A5, A31, A27, A185, A184, |
|              | A32, A177, A29, A180, A232,     |
|              | A231, A201, A186, A200, A193,   |
|              | A390                            |
| SNP Position | 539740                          |
|              | /strand=reverse                 |
|              | /SNP="G->T"                     |
|              | /codon_type=Synonymous          |
|              | /taxa=A5, A31, A27, A185, A184, |
|              | A32, A177, A29, A180, A232,     |
|              | A231, A201, A186, A200, A193,   |
|              | A390                            |
| SNP Position | 539747                          |
|              | /strand=reverse                 |
|              | /SNP="A->G"                     |
|              | /codon_type=Synonymous          |
|              | /taxa=A5, A31, A27, A185, A184, |
|              | A32, A177, A29, A180, A232,     |
|              | A231, A201, A186, A200, A193,   |
|              | A390                            |
| SNP Position | 539759                          |
|              | /strand=reverse                 |
|              | /SNP="A->G"                     |
|              | /codon_type=Synonymous          |
|              | /taxa=A5, A31, A27, A185, A184, |
|              | A32, A177, A29, A180, A232,     |
|              | A231, A201, A186, A200, A193,   |
|              | A390                            |
| SNP Position | 539771                          |
|              | /strand=reverse                 |
|              | /SNP="T->A"                     |
|              | /codon_type=Nonsynonymous       |
|              | /taxa=A5, A31, A27, A185, A184, |
|              | A32, A177, A29, A180, A232,     |
|              | A231, A201, A186, A200, A193,   |
|              | A390                            |
| SNP Position | 539798                          |
|              | /strand=reverse                 |
|              | /SNP="T->G"                     |
|              | /codon_type=Synonymous          |
|              | /taxa=A5, A31, A27, A185, A184, |
|              | A32, A177, A29, A180, A232,     |
|              | A231, A201, A186, A200, A193,   |
|              | A390                            |
| SNP Position | 539818                          |

|              |                                 |
|--------------|---------------------------------|
|              | /strand=reverse                 |
|              | /SNP="G->A"                     |
|              | /codon_type=Synonymous          |
|              | /taxa=A5, A31, A27, A185, A184, |
|              | A32, A177, A29, A180, A232,     |
|              | A231, A201, A186, A200, A193,   |
|              | A390                            |
| SNP Position | 539840                          |
|              | /strand=reverse                 |
|              | /SNP="T->C"                     |
|              | /codon_type=Synonymous          |
|              | /taxa=A5, A31, A27, A185, A184, |
|              | A32, A177, A29, A180, A232,     |
|              | A231, A201, A186, A200, A193,   |
|              | A390                            |
| SNP Position | 539845                          |
|              | /strand=reverse                 |
|              | /SNP="A->G"                     |
|              | /codon_type=Nonsynonymous       |
|              | /taxa=A5, A31, A27, A185, A184, |
|              | A32, A177, A29, A180, A232,     |
|              | A231, A201, A186, A200, A193,   |
|              | A390                            |
| SNP Position | 539864                          |
|              | /strand=reverse                 |
|              | /SNP="T->C"                     |
|              | /codon_type=Synonymous          |
|              | /taxa=A5, A31, A27, A185, A184, |
|              | A32, A177, A29, A180, A232,     |
|              | A231, A201, A186, A200, A193,   |
|              | A390                            |
| SNP Position | 539888                          |
|              | /strand=reverse                 |
|              | /SNP="A->G"                     |
|              | /codon_type=Synonymous          |
|              | /taxa=A5, A31, A27, A185, A184, |
|              | A32, A177, A29, A180, A232,     |
|              | A231, A201, A186, A200, A193,   |
|              | A390                            |
| SNP Position | 539892                          |
|              | /strand=reverse                 |
|              | /SNP="G->A"                     |
|              | /codon_type=Nonsynonymous       |
|              | /taxa=A5, A31, A27, A185, A184, |
|              | A32, A177, A29, A180, A232,     |
|              | A231, A201, A186, A200, A193,   |
|              | A390                            |
| SNP Position | 539897                          |
|              | /strand=reverse                 |
|              | /SNP="G->A"                     |
|              | /codon_type=Synonymous          |
|              | /taxa=A5, A31, A27, A185, A184, |
|              | A32, A177, A29, A180, A232,     |

|              |                                 |
|--------------|---------------------------------|
|              | A231, A201, A186, A200, A193,   |
|              | A390                            |
| SNP Position | 539903                          |
|              | /strand=reverse                 |
|              | /SNP="G->A"                     |
|              | /codon_type=Synonymous          |
|              | /taxa=A5, A31, A27, A185, A184, |
|              | A32, A177, A29, A180, A232,     |
|              | A231, A201, A186, A200, A193,   |
|              | A390                            |
| SNP Position | 539918                          |
|              | /strand=reverse                 |
|              | /SNP="G->C"                     |
|              | /codon_type=Nonsynonymous       |
|              | /taxa=A5, A31, A27, A185, A184, |
|              | A32, A177, A29, A180, A232,     |
|              | A231, A201, A186, A200, A193,   |
|              | A390                            |
| SNP Position | 539919                          |
|              | /strand=reverse                 |
|              | /SNP="T->G"                     |
|              | /codon_type=Nonsynonymous       |
|              | /taxa=A5, A31, A27, A185, A184, |
|              | A32, A177, A29, A180, A232,     |
|              | A231, A201, A186, A200, A193,   |
|              | A390                            |
| SNP Position | 539924                          |
|              | /strand=reverse                 |
|              | /SNP="T->C"                     |
|              | /codon_type=Synonymous          |
|              | /taxa=A5, A31, A27, A185, A184, |
|              | A32, A177, A29, A180, A232,     |
|              | A231, A201, A186, A200, A193,   |
|              | A390                            |
| SNP Position | 539933                          |
|              | /strand=reverse                 |
|              | /SNP="A->C"                     |
|              | /codon_type=Synonymous          |
|              | /taxa=A5, A31, A27, A185, A184, |
|              | A32, A177, A29, A180, A232,     |
|              | A231, A201, A186, A200, A193,   |
|              | A390                            |
| SNP Position | 539936                          |
|              | /strand=reverse                 |
|              | /SNP="G->C"                     |
|              | /codon_type=Synonymous          |
|              | /taxa=A5, A31, A27, A185, A184, |
|              | A32, A177, A29, A180, A232,     |
|              | A231, A201, A186, A200, A193,   |
|              | A390                            |
| SNP Position | 539984                          |
|              | /strand=reverse                 |
|              | /SNP="C->A"                     |



|              |                                             |
|--------------|---------------------------------------------|
|              | /codon_type=Nonsynonymous                   |
|              | /taxa=A5, A31, A27, A185, A184,             |
|              | A32, A177, A29, A180, A232,                 |
|              | A231, A201, A186, A200, A193,               |
|              | A390                                        |
| SNP Position | 540008                                      |
|              | /SNP="G->A"                                 |
|              | /codon_type=Intergenic                      |
|              | /taxa=A5, A31, A27, A185, A184,             |
|              | A32, A177, A29, A180, A232,                 |
|              | A231, A201, A186, A200, A193,               |
|              | A390                                        |
| SNP Position | 540029                                      |
|              | /SNP="G->A"                                 |
|              | /codon_type=Intergenic                      |
|              | /taxa=A5, A31, A27, A185, A184,             |
|              | A32, A177, A29, A180, A232,                 |
|              | A231, A201, A186, A200, A193,               |
|              | A390                                        |
| SNP Position | 540031                                      |
|              | /SNP="A->G"                                 |
|              | /codon_type=Intergenic                      |
|              | /taxa=A5, A31, A27, A185, A184,             |
|              | A32, A177, A29, A180, A232,                 |
|              | A231, A201, A186, A200, A193,               |
|              | A390                                        |
| SNP Position | 540061                                      |
|              | /SNP="G->T"                                 |
|              | /codon_type=Intergenic                      |
|              | /taxa=A5, A31, A27, A185, A184,             |
|              | A32, A177, A29, A180, A232,                 |
|              | A231, A201, A186, A200, A193,               |
|              | A390                                        |
| SNP Position | 540070                                      |
|              | /SNP="A->C"                                 |
|              | /codon_type=Intergenic                      |
|              | /taxa=A5, A31, A27, A185, A184,             |
|              | A32, A177, A29, A180, A232,                 |
|              | A231, A201, A186, A200, A193,               |
|              | A390                                        |
| SNP Position | 540184                                      |
|              | /SNP="G->A"                                 |
|              | /codon_type=Intergenic                      |
|              | /taxa=GP152, A397, A22, GP60                |
| SNP Position | 544298                                      |
|              | /SNP="C->T"                                 |
|              | /codon_type=Intergenic                      |
|              | /taxa=PRL18                                 |
| SNP Position | 544446                                      |
|              | /SNP="C->T"                                 |
|              | /codon_type=Nonsynonymous                   |
|              | /taxa=MG116025, MG116226, 4660, 4675, 4663, |
|              | 4662, A487_1, A487_2, CIRS101, 4679, MBN17, |

|              |                                                  |
|--------------|--------------------------------------------------|
|              | 2010EL_1798, 2010EL_1786, 2010EL_1792, IDHO1726, |
|              | 4519, 4538, 4661, A488_2, A488_1,                |
|              | PRL64, MBRN14, 4122, 4488, 4600,                 |
|              | 4585, 4536, 4623, 4605, 4593,                    |
|              | 4552, 4551, 4642, 4656, 4646,                    |
|              | 4339, 4322, 4784, 6210, 6215,                    |
|              | 6214, 6212, 6196, 6191, 6195,                    |
|              | 6193, 6194, 6201, 6197, 6180,                    |
|              | A482, A483, A481, 7682, 7684,                    |
|              | 7687, 7685, 7686, V5, V109,                      |
|              | A130, A131, VC51, V212-1, MJ1485, MJ1236,        |
|              | A346_2, A346_1, B33, 1627, 1346, 1362,           |
|              | 4670, 4672, 4121, 4110, 4111,                    |
|              | 4113, A109, A383, A330, MO10, PRL5,              |
|              | A316, A245, A241, A10                            |
| SNP Position | 545918                                           |
|              | /SNP="T->G"                                      |
|              | /codon_type=Nonsynonymous                        |
|              | /taxa=MBRN14, 4122, 4488, 4600, 4585,            |
|              | 4536, 4623, 4605, 4593, 4552,                    |
|              | 4551, 4642, 4656, 4646, 4339, 4322               |
| SNP Position | 547187                                           |
|              | /SNP="A->G"                                      |
|              | /codon_type=Nonsynonymous                        |
|              | /taxa=A245, A241                                 |
| SNP Position | 548862                                           |
|              | /strand=reverse                                  |
|              | /SNP="T->A"                                      |
|              | /codon_type=Nonsynonymous                        |
|              | /taxa=A5, A31, A27, A185, A184,                  |
|              | A32, A177, A29, A180, A232,                      |
|              | A231, A201, A186, A200, A193,                    |
|              | A390                                             |
| SNP Position | 548881                                           |
|              | /strand=reverse                                  |
|              | /SNP="T->C"                                      |
|              | /codon_type=Synonymous                           |
|              | /taxa=A5, A31, A27, A185, A184,                  |
|              | A32, A177, A29, A180, A232,                      |
|              | A231, A201, A186, A200, A193,                    |
|              | A390                                             |
| SNP Position | 548884                                           |
|              | /strand=reverse                                  |
|              | /SNP="G->A"                                      |
|              | /codon_type=Synonymous                           |
|              | /taxa=A5, A31, A27, A185, A184,                  |
|              | A32, A177, A29, A180, A232,                      |
|              | A231, A201, A186, A200, A193,                    |
|              | A390                                             |
| SNP Position | 548898                                           |
|              | /strand=reverse                                  |
|              | /SNP="T->G"                                      |
|              | /codon_type=Synonymous                           |

|              |                                 |
|--------------|---------------------------------|
|              | /taxa=A5, A31, A27, A185, A184, |
|              | A32, A177, A29, A180, A232,     |
|              | A231, A201, A186, A200, A193,   |
|              | A390                            |
| SNP Position | 548899                          |
|              | /strand=reverse                 |
|              | /SNP="G->A"                     |
|              | /codon_type=Synonymous          |
|              | /taxa=A5, A31, A27, A185, A184, |
|              | A32, A177, A29, A180, A232,     |
|              | A231, A201, A186, A200, A193,   |
|              | A390                            |
| SNP Position | 548902                          |
|              | /strand=reverse                 |
|              | /SNP="G->A"                     |
|              | /codon_type=Synonymous          |
|              | /taxa=A5, A31, A27, A185, A184, |
|              | A32, A177, A29, A180, A232,     |
|              | A231, A201, A186, A200, A193,   |
|              | A390                            |
| SNP Position | 548905                          |
|              | /strand=reverse                 |
|              | /SNP="T->A"                     |
|              | /codon_type=Synonymous          |
|              | /taxa=A5, A31, A27, A185, A184, |
|              | A32, A177, A29, A180, A232,     |
|              | A231, A201, A186, A200, A193,   |
|              | A390                            |
| SNP Position | 548917                          |
|              | /strand=reverse                 |
|              | /SNP="C->T"                     |
|              | /codon_type=Synonymous          |
|              | /taxa=A5, A31, A27, A185, A184, |
|              | A32, A177, A29, A180, A232,     |
|              | A231, A201, A186, A200, A193,   |
|              | A390                            |
| SNP Position | 549123                          |
|              | /strand=reverse                 |
|              | /SNP="T->C"                     |
|              | /codon_type=Nonsynonymous       |
|              | /taxa=A5, A31, A27, A185, A184, |
|              | A32, A177, A29, A180, A232,     |
|              | A231, A201, A186, A200, A193,   |
|              | A390                            |
| SNP Position | 549127                          |
|              | /strand=reverse                 |
|              | /SNP="T->G"                     |
|              | /codon_type=Synonymous          |
|              | /taxa=A5, A31, A27, A185, A184, |
|              | A32, A177, A29, A180, A232,     |
|              | A231, A201, A186, A200, A193,   |
|              | A390                            |
| SNP Position | 549133                          |

|              |                                 |
|--------------|---------------------------------|
|              | /strand=reverse                 |
|              | /SNP="T->C"                     |
|              | /codon_type=Synonymous          |
|              | /taxa=A5, A31, A27, A185, A184, |
|              | A32, A177, A29, A180, A232,     |
|              | A231, A201, A186, A200, A193,   |
|              | A390                            |
| SNP Position | 549145                          |
|              | /strand=reverse                 |
|              | /SNP="C->T"                     |
|              | /codon_type=Synonymous          |
|              | /taxa=A5, A31, A27, A185, A184, |
|              | A32, A177, A29, A180, A232,     |
|              | A231, A201, A186, A200, A193,   |
|              | A390                            |
| SNP Position | 549166                          |
|              | /strand=reverse                 |
|              | /SNP="A->T"                     |
|              | /codon_type=Synonymous          |
|              | /taxa=A5, A31, A27, A185, A184, |
|              | A32, A177, A29, A180, A232,     |
|              | A231, A201, A186, A200, A193,   |
|              | A390                            |
| SNP Position | 549169                          |
|              | /strand=reverse                 |
|              | /SNP="A->G"                     |
|              | /codon_type=Synonymous          |
|              | /taxa=A5, A31, A27, A185, A184, |
|              | A32, A177, A29, A180, A232,     |
|              | A231, A201, A186, A200, A193,   |
|              | A390                            |
| SNP Position | 549172                          |
|              | /strand=reverse                 |
|              | /SNP="C->A"                     |
|              | /codon_type=Synonymous          |
|              | /taxa=A5, A31, A27, A185, A184, |
|              | A32, A177, A29, A180, A232,     |
|              | A231, A201, A186, A200, A193,   |
|              | A390                            |
| SNP Position | 549175                          |
|              | /strand=reverse                 |
|              | /SNP="A->G"                     |
|              | /codon_type=Synonymous          |
|              | /taxa=A5, A31, A27, A185, A184, |
|              | A32, A177, A29, A180, A232,     |
|              | A231, A201, A186, A200, A193,   |
|              | A390                            |
| SNP Position | 549181                          |
|              | /strand=reverse                 |
|              | /SNP="A->G"                     |
|              | /codon_type=Synonymous          |
|              | /taxa=A5, A31, A27, A185, A184, |
|              | A32, A177, A29, A180, A232,     |

|              |                                 |
|--------------|---------------------------------|
|              | A231, A201, A186, A200, A193,   |
|              | A390                            |
| SNP Position | 549187                          |
|              | /strand=reverse                 |
|              | /SNP="G->A"                     |
|              | /codon_type=Synonymous          |
|              | /taxa=A5, A31, A27, A185, A184, |
|              | A32, A177, A29, A180, A232,     |
|              | A231, A201, A186, A200, A193,   |
|              | A390                            |
| SNP Position | 549223                          |
|              | /strand=reverse                 |
|              | /SNP="T->C"                     |
|              | /codon_type=Synonymous          |
|              | /taxa=A5, A31, A27, A185, A184, |
|              | A32, A177, A29, A180, A232,     |
|              | A231, A201, A186, A200, A193,   |
|              | A390                            |
| SNP Position | 549226                          |
|              | /strand=reverse                 |
|              | /SNP="C->T"                     |
|              | /codon_type=Synonymous          |
|              | /taxa=A5, A31, A27, A185, A184, |
|              | A32, A177, A29, A180, A232,     |
|              | A231, A201, A186, A200, A193,   |
|              | A390                            |
| SNP Position | 549234                          |
|              | /strand=reverse                 |
|              | /SNP="T->C"                     |
|              | /codon_type=Nonsynonymous       |
|              | /taxa=A5, A31, A27, A185, A184, |
|              | A32, A177, A29, A180, A232,     |
|              | A231, A201, A186, A200, A193,   |
|              | A390                            |
| SNP Position | 549238                          |
|              | /strand=reverse                 |
|              | /SNP="G->A"                     |
|              | /codon_type=Synonymous          |
|              | /taxa=A5, A31, A27, A185, A184, |
|              | A32, A177, A29, A180, A232,     |
|              | A231, A201, A186, A200, A193,   |
|              | A390                            |
| SNP Position | 549241                          |
|              | /strand=reverse                 |
|              | /SNP="G->A"                     |
|              | /codon_type=Synonymous          |
|              | /taxa=A5, A31, A27, A185, A184, |
|              | A32, A177, A29, A180, A232,     |
|              | A231, A201, A186, A200, A193,   |
|              | A390                            |
| SNP Position | 549244                          |
|              | /strand=reverse                 |
|              | /SNP="A->G"                     |

|              |                                 |
|--------------|---------------------------------|
|              | /codon_type=Synonymous          |
|              | /taxa=A5, A31, A27, A185, A184, |
|              | A32, A177, A29, A180, A232,     |
|              | A231, A201, A186, A200, A193,   |
|              | A390                            |
| SNP Position | 549268                          |
|              | /strand=reverse                 |
|              | /SNP="C->T"                     |
|              | /codon_type=Synonymous          |
|              | /taxa=A5, A31, A27, A185, A184, |
|              | A32, A177, A29, A180, A232,     |
|              | A231, A201, A186, A200, A193,   |
|              | A390                            |
| SNP Position | 549271                          |
|              | /strand=reverse                 |
|              | /SNP="G->A"                     |
|              | /codon_type=Synonymous          |
|              | /taxa=A5, A31, A27, A185, A184, |
|              | A32, A177, A29, A180, A232,     |
|              | A231, A201, A186, A200, A193,   |
|              | A390                            |
| SNP Position | 549274                          |
|              | /strand=reverse                 |
|              | /SNP="A->T"                     |
|              | /codon_type=Synonymous          |
|              | /taxa=A5, A31, A27, A185, A184, |
|              | A32, A177, A29, A180, A232,     |
|              | A231, A201, A186, A200, A193,   |
|              | A390                            |
| SNP Position | 549280                          |
|              | /strand=reverse                 |
|              | /SNP="T->C"                     |
|              | /codon_type=Synonymous          |
|              | /taxa=A5, A31, A27, A185, A184, |
|              | A32, A177, A29, A180, A232,     |
|              | A231, A201, A186, A200, A193,   |
|              | A390                            |
| SNP Position | 549286                          |
|              | /strand=reverse                 |
|              | /SNP="T->C"                     |
|              | /codon_type=Synonymous          |
|              | /taxa=A5, A31, A27, A185, A184, |
|              | A32, A177, A29, A180, A232,     |
|              | A231, A201, A186, A200, A193,   |
|              | A390                            |
| SNP Position | 549289                          |
|              | /strand=reverse                 |
|              | /SNP="A->G"                     |
|              | /codon_type=Synonymous          |
|              | /taxa=A5, A31, A27, A185, A184, |
|              | A32, A177, A29, A180, A232,     |
|              | A231, A201, A186, A200, A193,   |
|              | A390                            |

|              |                                 |
|--------------|---------------------------------|
| SNP Position | 549292                          |
|              | /strand=reverse                 |
|              | /SNP="C->T"                     |
|              | /codon_type=Synonymous          |
|              | /taxa=A5, A31, A27, A185, A184, |
|              | A32, A177, A29, A180, A232,     |
|              | A231, A201, A186, A200, A193,   |
|              | A390                            |
| SNP Position | 549295                          |
|              | /strand=reverse                 |
|              | /SNP="T->C"                     |
|              | /codon_type=Synonymous          |
|              | /taxa=A5, A31, A27, A185, A184, |
|              | A32, A177, A29, A180, A232,     |
|              | A231, A201, A186, A200, A193,   |
|              | A390                            |
| SNP Position | 549325                          |
|              | /strand=reverse                 |
|              | /SNP="T->C"                     |
|              | /codon_type=Synonymous          |
|              | /taxa=A5, A31, A27, A185, A184, |
|              | A32, A177, A29, A180, A232,     |
|              | A231, A201, A186, A200, A193,   |
|              | A390                            |
| SNP Position | 549331                          |
|              | /strand=reverse                 |
|              | /SNP="A->G"                     |
|              | /codon_type=Synonymous          |
|              | /taxa=A5, A31, A27, A185, A184, |
|              | A32, A177, A29, A180, A232,     |
|              | A231, A201, A186, A200, A193,   |
|              | A390                            |
| SNP Position | 549338                          |
|              | /strand=reverse                 |
|              | /SNP="T->C"                     |
|              | /codon_type=Nonsynonymous       |
|              | /taxa=A5, A31, A27, A185, A184, |
|              | A32, A177, A29, A180, A232,     |
|              | A231, A201, A186, A200, A193,   |
|              | A390                            |
| SNP Position | 549339                          |
|              | /strand=reverse                 |
|              | /SNP="T->C"                     |
|              | /codon_type=Nonsynonymous       |
|              | /taxa=A5, A31, A27, A185, A184, |
|              | A32, A177, A29, A180, A232,     |
|              | A231, A201, A186, A200, A193,   |
|              | A390                            |
| SNP Position | 549340                          |
|              | /strand=reverse                 |
|              | /SNP="T->A"                     |
|              | /codon_type=Synonymous          |
|              | /taxa=A5, A31, A27, A185, A184, |

|              |                                 |
|--------------|---------------------------------|
|              | A32, A177, A29, A180, A232,     |
|              | A231, A201, A186, A200, A193,   |
|              | A390                            |
| SNP Position | 549355                          |
|              | /strand=reverse                 |
|              | /SNP="G->C"                     |
|              | /codon_type=Synonymous          |
|              | /taxa=A5, A31, A27, A185, A184, |
|              | A32, A177, A29, A180, A232,     |
|              | A231, A201, A186, A200, A193,   |
|              | A390                            |
| SNP Position | 549357                          |
|              | /strand=reverse                 |
|              | /SNP="G->A"                     |
|              | /codon_type=Synonymous          |
|              | /taxa=A5, A31, A27, A185, A184, |
|              | A32, A177, A29, A180, A232,     |
|              | A231, A201, A186, A200, A193,   |
|              | A390                            |
| SNP Position | 549435                          |
|              | /strand=reverse                 |
|              | /SNP="A->G"                     |
|              | /codon_type=Synonymous          |
|              | /taxa=A5, A31, A27, A185, A184, |
|              | A32, A177, A29, A180, A232,     |
|              | A231, A201, A186, A200, A193,   |
|              | A390                            |
| SNP Position | 549460                          |
|              | /strand=reverse                 |
|              | /SNP="A->C"                     |
|              | /codon_type=Synonymous          |
|              | /taxa=A5, A31, A27, A185, A184, |
|              | A32, A177, A29, A180, A232,     |
|              | A231, A201, A186, A200, A193,   |
|              | A390                            |
| SNP Position | 549478                          |
|              | /strand=reverse                 |
|              | /SNP="A->C"                     |
|              | /codon_type=Synonymous          |
|              | /taxa=A5, A31, A27, A185, A184, |
|              | A32, A177, A29, A180, A232,     |
|              | A231, A201, A186, A200, A193,   |
|              | A390                            |
| SNP Position | 549499                          |
|              | /strand=reverse                 |
|              | /SNP="T->G"                     |
|              | /codon_type=Synonymous          |
|              | /taxa=A5, A31, A27, A185, A184, |
|              | A32, A177, A29, A180, A232,     |
|              | A231, A201, A186, A200, A193,   |
|              | A390                            |
| SNP Position | 549553                          |
|              | /strand=reverse                 |



|              |                                 |
|--------------|---------------------------------|
|              | /SNP="T->G"                     |
|              | /codon_type=Synonymous          |
|              | /taxa=A5, A31, A27, A185, A184, |
|              | A32, A177, A29, A180, A232,     |
|              | A231, A201, A186, A200, A193,   |
|              | A390                            |
| SNP Position | 549580                          |
|              | /strand=reverse                 |
|              | /SNP="A->G"                     |
|              | /codon_type=Synonymous          |
|              | /taxa=A5, A31, A27, A185, A184, |
|              | A32, A177, A29, A180, A232,     |
|              | A231, A201, A186, A200, A193,   |
|              | A390                            |
| SNP Position | 549640                          |
|              | /strand=reverse                 |
|              | /SNP="C->T"                     |
|              | /codon_type=Synonymous          |
|              | /taxa=A5, A31, A27, A185, A184, |
|              | A32, A177, A29, A180, A232,     |
|              | A231, A201, A186, A200, A193,   |
|              | A390                            |
| SNP Position | 549652                          |
|              | /strand=reverse                 |
|              | /SNP="C->T"                     |
|              | /codon_type=Synonymous          |
|              | /taxa=A5, A31, A27, A185, A184, |
|              | A32, A177, A29, A180, A232,     |
|              | A231, A201, A186, A200, A193,   |
|              | A390                            |
| SNP Position | 549665                          |
|              | /strand=reverse                 |
|              | /SNP="C->T"                     |
|              | /codon_type=Nonsynonymous       |
|              | /taxa=A5, A31, A27, A185, A184, |
|              | A32, A177, A29, A180, A232,     |
|              | A231, A201, A186, A200, A193,   |
|              | A390                            |
| SNP Position | 549675                          |
|              | /strand=reverse                 |
|              | /SNP="T->C"                     |
|              | /codon_type=Nonsynonymous       |
|              | /taxa=A5, A31, A27, A185, A184, |
|              | A32, A177, A29, A180, A232,     |
|              | A231, A201, A186, A200, A193,   |
|              | A390                            |
| SNP Position | 549692                          |
|              | /strand=reverse                 |
|              | /SNP="T->A"                     |
|              | /codon_type=Nonsynonymous       |
|              | /taxa=A5, A31, A27, A185, A184, |
|              | A32, A177, A29, A180, A232,     |
|              | A231, A201, A186, A200, A193,   |

|              |                                 |
|--------------|---------------------------------|
|              | A390                            |
| SNP Position | 549718                          |
|              | /strand=reverse                 |
|              | /SNP="C->T"                     |
|              | /codon_type=Synonymous          |
|              | /taxa=A5, A31, A27, A185, A184, |
|              | A32, A177, A29, A180, A232,     |
|              | A231, A201, A186, A200, A193,   |
|              | A390                            |
| SNP Position | 549754                          |
|              | /strand=reverse                 |
|              | /SNP="T->C"                     |
|              | /codon_type=Synonymous          |
|              | /taxa=A5, A31, A27, A185, A184, |
|              | A32, A177, A29, A180, A232,     |
|              | A231, A201, A186, A200, A193,   |
|              | A390                            |
| SNP Position | 549757                          |
|              | /strand=reverse                 |
|              | /SNP="T->A"                     |
|              | /codon_type=Synonymous          |
|              | /taxa=A5, A31, A27, A185, A184, |
|              | A32, A177, A29, A180, A232,     |
|              | A231, A201, A186, A200, A193,   |
|              | A390                            |
| SNP Position | 549760                          |
|              | /strand=reverse                 |
|              | /SNP="G->A"                     |
|              | /codon_type=Synonymous          |
|              | /taxa=A5, A31, A27, A185, A184, |
|              | A32, A177, A29, A180, A232,     |
|              | A231, A201, A186, A200, A193,   |
|              | A390                            |
| SNP Position | 549778                          |
|              | /strand=reverse                 |
|              | /SNP="G->A"                     |
|              | /codon_type=Synonymous          |
|              | /taxa=A5, A31, A27, A185, A184, |
|              | A32, A177, A29, A180, A232,     |
|              | A231, A201, A186, A200, A193,   |
|              | A390                            |
| SNP Position | 549835                          |
|              | /strand=reverse                 |
|              | /SNP="A->G"                     |
|              | /codon_type=Nonsynonymous       |
|              | /taxa=A5, A31, A27, A185, A184, |
|              | A32, A177, A29, A180, A232,     |
|              | A231, A201, A186, A200, A193,   |
|              | A390                            |
| SNP Position | 549837                          |
|              | /strand=reverse                 |
|              | /SNP="A->T"                     |
|              | /codon_type=Nonsynonymous       |

|              |                                 |
|--------------|---------------------------------|
|              | /taxa=A5, A31, A27, A185, A184, |
|              | A32, A177, A29, A180, A232,     |
|              | A231, A201, A186, A200, A193,   |
|              | A390                            |
| SNP Position | 549865                          |
|              | /strand=reverse                 |
|              | /SNP="G->T"                     |
|              | /codon_type=Synonymous          |
|              | /taxa=A5, A31, A27, A185, A184, |
|              | A32, A177, A29, A180, A232,     |
|              | A231, A201, A186, A200, A193,   |
|              | A390                            |
| SNP Position | 549871                          |
|              | /strand=reverse                 |
|              | /SNP="T->C"                     |
|              | /codon_type=Synonymous          |
|              | /taxa=A5, A31, A27, A185, A184, |
|              | A32, A177, A29, A180, A232,     |
|              | A231, A201, A186, A200, A193,   |
|              | A390                            |
| SNP Position | 549904                          |
|              | /strand=reverse                 |
|              | /SNP="G->A"                     |
|              | /codon_type=Synonymous          |
|              | /taxa=A5, A31, A27, A185, A184, |
|              | A32, A177, A29, A180, A232,     |
|              | A231, A201, A186, A200, A193,   |
|              | A390                            |
| SNP Position | 549922                          |
|              | /strand=reverse                 |
|              | /SNP="T->C"                     |
|              | /codon_type=Synonymous          |
|              | /taxa=A5, A31, A27, A185, A184, |
|              | A32, A177, A29, A180, A232,     |
|              | A231, A201, A186, A200, A193,   |
|              | A390                            |
| SNP Position | 549982                          |
|              | /strand=reverse                 |
|              | /SNP="T->A"                     |
|              | /codon_type=Synonymous          |
|              | /taxa=A5, A31, A27, A185, A184, |
|              | A32, A177, A29, A180, A232,     |
|              | A231, A201, A186, A200, A193,   |
|              | A390                            |
| SNP Position | 549988                          |
|              | /strand=reverse                 |
|              | /SNP="G->A"                     |
|              | /codon_type=Synonymous          |
|              | /taxa=A5, A31, A27, A185, A184, |
|              | A32, A177, A29, A180, A232,     |
|              | A231, A201, A186, A200, A193,   |
|              | A390                            |
| SNP Position | 550006                          |

|              |                                 |
|--------------|---------------------------------|
|              | /strand=reverse                 |
|              | /SNP="T->C"                     |
|              | /codon_type=Synonymous          |
|              | /taxa=A5, A31, A27, A185, A184, |
|              | A32, A177, A29, A180, A232,     |
|              | A231, A201, A186, A200, A193,   |
|              | A390                            |
| SNP Position | 550051                          |
|              | /SNP="T->C"                     |
|              | /codon_type=Intergenic          |
|              | /taxa=A5, A31, A27, A185, A184, |
|              | A32, A177, A29, A180, A232,     |
|              | A231, A201, A186, A200, A193,   |
|              | A390                            |
| SNP Position | 550102                          |
|              | /SNP="C->A"                     |
|              | /codon_type=Intergenic          |
|              | /taxa=A5, A31, A27, A185, A184, |
|              | A32, A177, A29, A180, A232,     |
|              | A231, A201, A186, A200, A193,   |
|              | A390                            |
| SNP Position | 550869                          |
|              | /strand=reverse                 |
|              | /SNP="A->C"                     |
|              | /codon_type=Nonsynonymous       |
|              | /taxa=4339                      |
| SNP Position | 551391                          |
|              | /strand=reverse                 |
|              | /SNP="A->C"                     |
|              | /codon_type=Nonsynonymous       |
|              | /taxa=4675                      |
| SNP Position | 554545                          |
|              | /strand=reverse                 |
|              | /SNP="C->T"                     |
|              | /codon_type=Nonsynonymous       |
|              | /taxa=A152, A155, A154          |
| SNP Position | 556978                          |
|              | /SNP="C->T"                     |
|              | /codon_type=Synonymous          |
|              | /taxa=B33, 1627, 1346, 1362     |
| SNP Position | 558813                          |
|              | /SNP="G->A"                     |
|              | /codon_type=Nonsynonymous       |
|              | /taxa=A4                        |
| SNP Position | 558833                          |
|              | /SNP="G->A"                     |
|              | /codon_type=Synonymous          |
|              | /taxa=A5, A31, A27, A185, A184, |
|              | A32, A177, A29, A180, A232,     |
|              | A231, A201, A186, A200, A193,   |
|              | A390                            |
| SNP Position | 560255                          |
|              | /SNP="T->C"                     |

|              |                           |
|--------------|---------------------------|
|              | /codon_type=Nonsynonymous |
|              | /taxa=A4                  |
| SNP Position | 566051                    |
|              | /strand=reverse           |
|              | /SNP="G->A"               |
|              | /codon_type=Nonsynonymous |
|              | /taxa=A4                  |
| SNP Position | 568021                    |
|              | /strand=reverse           |
|              | /SNP="A->G"               |
|              | /codon_type=Nonsynonymous |
|              | /taxa=A130, A131          |
| SNP Position | 568661                    |
|              | /SNP="A->T"               |
|              | /codon_type=Intergenic    |
|              | /taxa=A152, A155, A154    |
| SNP Position | 573670                    |
|              | /SNP="C->T"               |
|              | /codon_type=Nonsynonymous |
|              | /taxa=4111                |
| SNP Position | 575610                    |
|              | /SNP="G->A"               |
|              | /codon_type=Nonsynonymous |
|              | /taxa=N16961, A19         |
| SNP Position | 581098                    |
|              | /SNP="T->C"               |
|              | /codon_type=Intergenic    |
|              | /taxa=A4                  |
| SNP Position | 581099                    |
|              | /SNP="C->T"               |
|              | /codon_type=Intergenic    |
|              | /taxa=A4                  |
| SNP Position | 581339                    |
|              | /SNP="A->G"               |
|              | /codon_type=Intergenic    |
|              | /taxa=4488                |
| SNP Position | 581574                    |
|              | /SNP="C->T"               |
|              | /codon_type=Intergenic    |
|              | /taxa=A6                  |
| SNP Position | 581591                    |
|              | /SNP="A->G"               |
|              | /codon_type=Intergenic    |
|              | /taxa=A6                  |
| SNP Position | 584417                    |
|              | /SNP="G->A"               |
|              | /codon_type=Nonsynonymous |
|              | /taxa=A4                  |
| SNP Position | 586104                    |
|              | /SNP="G->A"               |
|              | /codon_type=Synonymous    |
|              | /taxa=A4                  |
| SNP Position | 593828                    |

|              |                                                    |
|--------------|----------------------------------------------------|
|              | /strand=reverse                                    |
|              | /SNP="T->C"                                        |
|              | /codon_type=Nonsynonymous                          |
|              | /taxa=A4                                           |
| SNP Position | 594850                                             |
|              | /SNP="T->G"                                        |
|              | /codon_type=Nonsynonymous                          |
|              | /taxa=A22                                          |
| SNP Position | 598995                                             |
|              | /strand=reverse                                    |
|              | /SNP="C->A"                                        |
|              | /codon_type=Synonymous                             |
|              | /taxa=4672                                         |
| SNP Position | 599512                                             |
|              | /SNP="T->A"                                        |
|              | /codon_type=Intergenic                             |
|              | /taxa=M66, A6                                      |
| SNP Position | 602082                                             |
|              | /SNP="G->A"                                        |
|              | /codon_type=Synonymous                             |
|              | /taxa=4662                                         |
| SNP Position | 603442                                             |
|              | /SNP="G->T"                                        |
|              | /codon_type=Nonsynonymous                          |
|              | /taxa=4121, 4110, 4111, 4113                       |
| SNP Position | 607918                                             |
|              | /SNP="T->C"                                        |
|              | /codon_type=Synonymous                             |
|              | /taxa=VC51                                         |
| SNP Position | 608416                                             |
|              | /strand=reverse                                    |
|              | /SNP="T->C"                                        |
|              | /codon_type=Nonsynonymous                          |
|              | /taxa=A4                                           |
| SNP Position | 612222                                             |
|              | /SNP="G->T"                                        |
|              | /codon_type=Nonsynonymous                          |
|              | /taxa=A4                                           |
| SNP Position | 612223                                             |
|              | /SNP="A->G"                                        |
|              | /codon_type=Nonsynonymous                          |
|              | /taxa=A4                                           |
| SNP Position | 612300                                             |
|              | /SNP="C->T"                                        |
|              | /codon_type=SNOP (non-stop codon to stop condon)   |
|              | /taxa=GP152                                        |
| SNP Position | 612673                                             |
|              | /SNP="C->T"                                        |
|              | /homoplasy=convergence with branch leading to 4113 |
|              | /codon_type=Intergenic                             |
|              | /taxa=4660                                         |
| SNP Position | 612673                                             |
|              | /SNP="C->T"                                        |

|              |                                                    |
|--------------|----------------------------------------------------|
|              | /homoplasy=convergence with branch leading to 4660 |
|              | /codon_type=Intergenic                             |
|              | /taxa=4113                                         |
| SNP Position | 612803                                             |
|              | /SNP="C->A"                                        |
|              | /codon_type=Intergenic                             |
|              | /taxa=A18                                          |
| SNP Position | 612822                                             |
|              | /SNP="A->T"                                        |
|              | /codon_type=Intergenic                             |
|              | /taxa=4551                                         |
| SNP Position | 612825                                             |
|              | /SNP="C->T"                                        |
|              | /codon_type=Intergenic                             |
|              | /taxa=4661                                         |
| SNP Position | 612830                                             |
|              | /SNP="C->T"                                        |
|              | /codon_type=Intergenic                             |
|              | /taxa=MBN17                                        |
| SNP Position | 612847                                             |
|              | /SNP="C->T"                                        |
|              | /codon_type=Intergenic                             |
|              | /taxa=A487_1, A487_2                               |
| SNP Position | 612988                                             |
|              | /SNP="A->C"                                        |
|              | /codon_type=Intergenic                             |
|              | /taxa=A184                                         |
| SNP Position | 613023                                             |
|              | /SNP="G->A"                                        |
|              | /codon_type=Intergenic                             |
|              | /taxa=4536                                         |
| SNP Position | 613052                                             |
|              | /SNP="A->C"                                        |
|              | /codon_type=Intergenic                             |
|              | /taxa=4675                                         |
| SNP Position | 613071                                             |
|              | /SNP="C->T"                                        |
|              | /codon_type=Intergenic                             |
|              | /taxa=MG116226                                     |
| SNP Position | 613074                                             |
|              | /SNP="A->G"                                        |
|              | /codon_type=Intergenic                             |
|              | /taxa=A330                                         |
| SNP Position | 613143                                             |
|              | /SNP="C->T"                                        |
|              | /homoplasy=convergence with branch leading to A245 |
|              | /codon_type=Intergenic                             |
|              | /taxa=A481                                         |
| SNP Position | 613143                                             |
|              | /SNP="C->A"                                        |
|              | /codon_type=Intergenic                             |
|              | /taxa=MO10                                         |
| SNP Position | 613143                                             |

|              |                                                    |
|--------------|----------------------------------------------------|
|              | /SNP="C->T"                                        |
|              | /homoplasy=convergence with branch leading to A481 |
|              | /codon_type=Intergenic                             |
|              | /taxa=A245                                         |
| SNP Position | 613262                                             |
|              | /SNP="A->G"                                        |
|              | /codon_type=Intergenic                             |
|              | /taxa=PRL5                                         |
| SNP Position | 613288                                             |
|              | /SNP="C->T"                                        |
|              | /codon_type=Intergenic                             |
|              | /taxa=GP145, GP160, GP106                          |
| SNP Position | 614171                                             |
|              | /strand=reverse                                    |
|              | /SNP="T->C"                                        |
|              | /codon_type=Synonymous                             |
|              | /taxa=4660                                         |
| SNP Position | 620174                                             |
|              | /strand=reverse                                    |
|              | /SNP="G->A"                                        |
|              | /codon_type=Nonsynonymous                          |
|              | /taxa=A131                                         |
| SNP Position | 623498                                             |
|              | /strand=reverse                                    |
|              | /SNP="G->A"                                        |
|              | /codon_type=Nonsynonymous                          |
|              | /taxa=A4                                           |
| SNP Position | 632341                                             |
|              | /SNP="C->T"                                        |
|              | /codon_type=Nonsynonymous                          |
|              | /taxa=B33, 1627, 1346, 1362                        |
| SNP Position | 633761                                             |
|              | /SNP="A->G"                                        |
|              | /codon_type=Intergenic                             |
|              | /taxa=A4                                           |
| SNP Position | 639109                                             |
|              | /SNP="T->C"                                        |
|              | /codon_type=Synonymous                             |
|              | /taxa=4121, 4110, 4111, 4113                       |
| SNP Position | 641983                                             |
|              | /SNP="C->T"                                        |
|              | /codon_type=Nonsynonymous                          |
|              | /taxa=B33, 1627, 1346, 1362                        |
| SNP Position | 645425                                             |
|              | /strand=reverse                                    |
|              | /SNP="A->G"                                        |
|              | /codon_type=Nonsynonymous                          |
|              | /taxa=A4                                           |
| SNP Position | 648634                                             |
|              | /strand=reverse                                    |
|              | /SNP="A->G"                                        |
|              | /codon_type=Synonymous                             |
|              | /taxa=4600, 4585, 4536, 4623                       |



|              |                                     |
|--------------|-------------------------------------|
| SNP Position | 652539                              |
|              | /strand=reverse                     |
|              | /SNP="G->T"                         |
|              | /codon_type=Nonsynonymous           |
|              | /taxa=6210, 6215, 6214, 6212, 6196, |
|              | 6191, 6195, 6193, 6194, 6201,       |
|              | 6197, 6180                          |
| SNP Position | 655376                              |
|              | /strand=reverse                     |
|              | /SNP="C->T"                         |
|              | /codon_type=Nonsynonymous           |
|              | /taxa=A4                            |
| SNP Position | 656622                              |
|              | /strand=reverse                     |
|              | /SNP="G->A"                         |
|              | /codon_type=Synonymous              |
|              | /taxa=A31, A27, A185, A184, A32,    |
|              | A177, A29, A180, A232, A231,        |
|              | A201, A186, A200, A193, A390        |
| SNP Position | 659772                              |
|              | /strand=reverse                     |
|              | /SNP="C->A"                         |
|              | /codon_type=Nonsynonymous           |
|              | /taxa=A482, A483, A481, 7682, 7684, |
|              | 7687, 7685, 7686                    |
| SNP Position | 667063                              |
|              | /SNP="A->G"                         |
|              | /codon_type=Nonsynonymous           |
|              | /taxa=A10                           |
| SNP Position | 667453                              |
|              | /SNP="A->G"                         |
|              | /codon_type=Synonymous              |
|              | /taxa=4600, 4585                    |
| SNP Position | 668932                              |
|              | /SNP="T->C"                         |
|              | /codon_type=Synonymous              |
|              | /taxa=A4                            |
| SNP Position | 668980                              |
|              | /SNP="A->G"                         |
|              | /codon_type=Nonsynonymous           |
|              | /taxa=7682, 7684, 7687, 7685, 7686  |
| SNP Position | 674883                              |
|              | /strand=reverse                     |
|              | /SNP="C->T"                         |
|              | /codon_type=Nonsynonymous           |
|              | /taxa=4552                          |
| SNP Position | 674884                              |
|              | /strand=reverse                     |
|              | /SNP="C->A"                         |
|              | /codon_type=Nonsynonymous           |
|              | /taxa=V109                          |
| SNP Position | 674887                              |
|              | /strand=reverse                     |

|              |                                                                     |
|--------------|---------------------------------------------------------------------|
|              | /SNP="C->A"                                                         |
|              | /codon_type=Nonsynonymous                                           |
|              | /taxa=4663, 4662, A487_1, A487_2                                    |
| SNP Position | 675273                                                              |
|              | /strand=reverse                                                     |
|              | /SNP="G->A"                                                         |
|              | /codon_type=Nonsynonymous                                           |
|              | /taxa=4675                                                          |
| SNP Position | 676185                                                              |
|              | /SNP="G->A"                                                         |
|              | /codon_type=Intergenic                                              |
|              | /taxa=A383, A330, MO10                                              |
| SNP Position | 676781                                                              |
|              | /SNP="C->A"                                                         |
|              | /codon_type=Nonsynonymous                                           |
|              | /taxa=4111                                                          |
| SNP Position | 681577                                                              |
|              | /SNP="G->T"                                                         |
|              | /codon_type=Nonsynonymous                                           |
|              | /taxa=4122, 4488, 4600, 4585, 4536,<br>4623, 4605, 4593, 4552, 4551 |
| SNP Position | 684801                                                              |
|              | /SNP="T->C"                                                         |
|              | /codon_type=Nonsynonymous                                           |
|              | /taxa=PRL18                                                         |
| SNP Position | 692531                                                              |
|              | /SNP="G->A"                                                         |
|              | /codon_type=Synonymous                                              |
|              | /taxa=4661, A488_2, A488_1                                          |
| SNP Position | 693227                                                              |
|              | /SNP="G->A"                                                         |
|              | /codon_type=Synonymous                                              |
|              | /taxa=A383                                                          |
| SNP Position | 694305                                                              |
|              | /SNP="C->T"                                                         |
|              | /codon_type=SNOP (non-stop codon to stop condon)                    |
|              | /taxa=4519                                                          |
| SNP Position | 694516                                                              |
|              | /SNP="C->T"                                                         |
|              | /codon_type=Nonsynonymous                                           |
|              | /taxa=RC9                                                           |
| SNP Position | 696937                                                              |
|              | /strand=reverse                                                     |
|              | /SNP="C->T"                                                         |
|              | /codon_type=Nonsynonymous                                           |
|              | /taxa=A4                                                            |
| SNP Position | 697749                                                              |
|              | /strand=reverse                                                     |
|              | /SNP="G->A"                                                         |
|              | /codon_type=Nonsynonymous                                           |
|              | /taxa=N16961, A19                                                   |
| SNP Position | 698661                                                              |
|              | /strand=reverse                                                     |

|              |                                                    |
|--------------|----------------------------------------------------|
|              | /SNP="G->A"                                        |
|              | /codon_type=Nonsynonymous                          |
|              | /taxa=A152, A155, A154                             |
| SNP Position | 701738                                             |
|              | /strand=reverse                                    |
|              | /SNP="A->G"                                        |
|              | /codon_type=Synonymous                             |
|              | /taxa=A4                                           |
| SNP Position | 703938                                             |
|              | /SNP="G->C"                                        |
|              | /codon_type=Synonymous                             |
|              | /taxa=4672                                         |
| SNP Position | 708717                                             |
|              | /SNP="G->A"                                        |
|              | /homoplasy=convergence with branch leading to V109 |
|              | /codon_type=Synonymous                             |
|              | /taxa=4660, 4675, 4663, 4662, A487_1,              |
|              | A487_2, CIRS101, 4679, MBN17, 2010EL_1798,         |
|              | 2010EL_1786, 2010EL_1792, IDHO1726, 4519, 4538,    |
|              | 4661, A488_2, A488_1, PRL64, MBRN14,               |
|              | 4122, 4488, 4600, 4585, 4536,                      |
|              | 4623, 4605, 4593, 4552, 4551,                      |
|              | 4642, 4656, 4646, 4339, 4322,                      |
|              | 4784, 6210, 6215, 6214, 6212,                      |
|              | 6196, 6191, 6195, 6193, 6194,                      |
|              | 6201, 6197, 6180, A482, A483,                      |
|              | A481, 7682, 7684, 7687, 7685,                      |
|              | 7686                                               |
| SNP Position | 708717                                             |
|              | /SNP="G->A"                                        |
|              | /homoplasy=convergence with branch leading to 5    |
|              | /codon_type=Synonymous                             |
|              | /taxa=V109                                         |
| SNP Position | 710243                                             |
|              | /SNP="G->T"                                        |
|              | /codon_type=Intergenic                             |
|              | /taxa=4675, 4663, 4662, A487_1, A487_2,            |
|              | CIRS101, 4679, MBN17, 2010EL_1798, 2010EL_1786,    |
|              | 2010EL_1792, IDHO1726, 4519, 4538, 4661,           |
|              | A488_2, A488_1, PRL64, MBRN14, 4122,               |
|              | 4488, 4600, 4585, 4536, 4623,                      |
|              | 4605, 4593, 4552, 4551, 4642,                      |
|              | 4656, 4646, 4339, 4322                             |
| SNP Position | 710243                                             |
|              | /SNP="G->A"                                        |
|              | /codon_type=Intergenic                             |
|              | /taxa=A316                                         |
| SNP Position | 712728                                             |
|              | /SNP="C->T"                                        |
|              | /codon_type=Nonsynonymous                          |
|              | /taxa=A18                                          |
| SNP Position | 712993                                             |
|              | /SNP="T->C"                                        |

|              |                                                                                                                                                                                                                                                                                                                                                                                                                                                                                                                                                                                                                      |
|--------------|----------------------------------------------------------------------------------------------------------------------------------------------------------------------------------------------------------------------------------------------------------------------------------------------------------------------------------------------------------------------------------------------------------------------------------------------------------------------------------------------------------------------------------------------------------------------------------------------------------------------|
|              | /codon_type=Nonsynonymous                                                                                                                                                                                                                                                                                                                                                                                                                                                                                                                                                                                            |
|              | /taxa=A241                                                                                                                                                                                                                                                                                                                                                                                                                                                                                                                                                                                                           |
| SNP Position | 716076                                                                                                                                                                                                                                                                                                                                                                                                                                                                                                                                                                                                               |
|              | /strand=reverse                                                                                                                                                                                                                                                                                                                                                                                                                                                                                                                                                                                                      |
|              | /SNP="T->C"                                                                                                                                                                                                                                                                                                                                                                                                                                                                                                                                                                                                          |
|              | /codon_type=Nonsynonymous                                                                                                                                                                                                                                                                                                                                                                                                                                                                                                                                                                                            |
|              | /taxa=MG116025, MG116226, 4660, 4675, 4663,<br>4662, A487_1, A487_2, CIRS101, 4679, MBN17,<br>2010EL_1798, 2010EL_1786, 2010EL_1792, IDHO1726,<br>4519, 4538, 4661, A488_2, A488_1,<br>PRL64, MBRN14, 4122, 4488, 4600,<br>4585, 4536, 4623, 4605, 4593,<br>4552, 4551, 4642, 4656, 4646,<br>4339, 4322, 4784, 6210, 6215,<br>6214, 6212, 6196, 6191, 6195,<br>6193, 6194, 6201, 6197, 6180,<br>A482, A483, A481, 7682, 7684,<br>7687, 7685, 7686, V5, V109,<br>A130, A131, VC51, V212-1, MJ1485, MJ1236,<br>A346_2, A346_1, B33, 1627, 1346, 1362,<br>4670, 4672, 4121, 4110, 4111,<br>4113, A109, A383, A330, MO10 |
| SNP Position | 719001                                                                                                                                                                                                                                                                                                                                                                                                                                                                                                                                                                                                               |
|              | /SNP="C->A"                                                                                                                                                                                                                                                                                                                                                                                                                                                                                                                                                                                                          |
|              | /codon_type=Synonymous                                                                                                                                                                                                                                                                                                                                                                                                                                                                                                                                                                                               |
|              | /taxa=A397, A22                                                                                                                                                                                                                                                                                                                                                                                                                                                                                                                                                                                                      |
| SNP Position | 720770                                                                                                                                                                                                                                                                                                                                                                                                                                                                                                                                                                                                               |
|              | /SNP="C->T"                                                                                                                                                                                                                                                                                                                                                                                                                                                                                                                                                                                                          |
|              | /codon_type=Nonsynonymous                                                                                                                                                                                                                                                                                                                                                                                                                                                                                                                                                                                            |
|              | /taxa=A5, A31, A27, A185, A184,<br>A32, A177, A29, A180, A232,<br>A231, A201, A186, A200, A193,<br>A390                                                                                                                                                                                                                                                                                                                                                                                                                                                                                                              |
| SNP Position | 727506                                                                                                                                                                                                                                                                                                                                                                                                                                                                                                                                                                                                               |
|              | /SNP="A->G"                                                                                                                                                                                                                                                                                                                                                                                                                                                                                                                                                                                                          |
|              | /codon_type=Nonsynonymous                                                                                                                                                                                                                                                                                                                                                                                                                                                                                                                                                                                            |
|              | /taxa=A241                                                                                                                                                                                                                                                                                                                                                                                                                                                                                                                                                                                                           |
| SNP Position | 737108                                                                                                                                                                                                                                                                                                                                                                                                                                                                                                                                                                                                               |
|              | /SNP="C->T"                                                                                                                                                                                                                                                                                                                                                                                                                                                                                                                                                                                                          |
|              | /codon_type=Nonsynonymous                                                                                                                                                                                                                                                                                                                                                                                                                                                                                                                                                                                            |
|              | /taxa=A4                                                                                                                                                                                                                                                                                                                                                                                                                                                                                                                                                                                                             |
| SNP Position | 741333                                                                                                                                                                                                                                                                                                                                                                                                                                                                                                                                                                                                               |
|              | /strand=reverse                                                                                                                                                                                                                                                                                                                                                                                                                                                                                                                                                                                                      |
|              | /SNP="C->A"                                                                                                                                                                                                                                                                                                                                                                                                                                                                                                                                                                                                          |
|              | /codon_type=Nonsynonymous                                                                                                                                                                                                                                                                                                                                                                                                                                                                                                                                                                                            |
|              | /taxa=4551                                                                                                                                                                                                                                                                                                                                                                                                                                                                                                                                                                                                           |
| SNP Position | 742004                                                                                                                                                                                                                                                                                                                                                                                                                                                                                                                                                                                                               |
|              | /strand=reverse                                                                                                                                                                                                                                                                                                                                                                                                                                                                                                                                                                                                      |
|              | /SNP="G->A"                                                                                                                                                                                                                                                                                                                                                                                                                                                                                                                                                                                                          |
|              | /codon_type=Nonsynonymous                                                                                                                                                                                                                                                                                                                                                                                                                                                                                                                                                                                            |
|              | /taxa=4642, 4656, 4646                                                                                                                                                                                                                                                                                                                                                                                                                                                                                                                                                                                               |
| SNP Position | 742062                                                                                                                                                                                                                                                                                                                                                                                                                                                                                                                                                                                                               |
|              | /strand=reverse                                                                                                                                                                                                                                                                                                                                                                                                                                                                                                                                                                                                      |

|              |                                                     |
|--------------|-----------------------------------------------------|
|              | /SNP="T->C"                                         |
|              | /codon_type=Nonsynonymous                           |
|              | /taxa=4593                                          |
| SNP Position | 742131                                              |
|              | /strand=reverse                                     |
|              | /SNP="C->T"                                         |
|              | /codon_type=Nonsynonymous                           |
|              | /taxa=4339                                          |
| SNP Position | 742266                                              |
|              | /strand=reverse                                     |
|              | /SNP="C->T"                                         |
|              | /codon_type=Nonsynonymous                           |
|              | /taxa=4519                                          |
| SNP Position | 742877                                              |
|              | /strand=reverse                                     |
|              | /SNP="A->G"                                         |
|              | /codon_type=Nonsynonymous                           |
|              | /taxa=A4                                            |
| SNP Position | 743136                                              |
|              | /strand=reverse                                     |
|              | /SNP="C->A"                                         |
|              | /codon_type=Nonsynonymous                           |
|              | /taxa=4670                                          |
| SNP Position | 743402                                              |
|              | /SNP="G->A"                                         |
|              | /codon_type=Intergenic                              |
|              | /taxa=A383                                          |
| SNP Position | 743406                                              |
|              | /SNP="A->G"                                         |
|              | /codon_type=Intergenic                              |
|              | /taxa=A5, A31, A27, A185, A184,                     |
|              | A32, A177, A29, A180, A232,                         |
|              | A231, A201, A186, A200, A193,                       |
|              | A390                                                |
| SNP Position | 743526                                              |
|              | /SNP="C->T"                                         |
|              | /codon_type=Intergenic                              |
|              | /taxa=A397                                          |
| SNP Position | 743698                                              |
|              | /SNP="C->A"                                         |
|              | /codon_type=Synonymous                              |
|              | /taxa=A5, A31, A27, A185, A184,                     |
|              | A32, A177, A29, A180, A232,                         |
|              | A231, A201, A186, A200, A193,                       |
|              | A390                                                |
| SNP Position | 744712                                              |
|              | /SNP="G->A"                                         |
|              | /codon_type=Synonymous                              |
|              | /taxa=MBN17, 2010EL_1798, 2010EL_1786, 2010EL_1792, |
|              | IDHO1726, 4519, 4538                                |
| SNP Position | 747634                                              |
|              | /strand=reverse                                     |
|              | /SNP="C->T"                                         |

|              |                                                  |
|--------------|--------------------------------------------------|
|              | /codon_type=Synonymous                           |
|              | /taxa=A4                                         |
| SNP Position | 748559                                           |
|              | /SNP="C->T"                                      |
|              | /codon_type=Nonsynonymous                        |
|              | /taxa=VC51, V212-1, MJ1485, MJ1236, A346_2,      |
|              | A346_1, B33, 1627, 1346, 1362, 4670,             |
|              | 4672, 4121, 4110, 4111, 4113                     |
| SNP Position | 748999                                           |
|              | /SNP="C->T"                                      |
|              | /codon_type=Synonymous                           |
|              | /taxa=A397, A22                                  |
| SNP Position | 749098                                           |
|              | /SNP="C->T"                                      |
|              | /codon_type=Synonymous                           |
|              | /taxa=4660, 4675, 4663, 4662, A487_1,            |
|              | A487_2, CIRS101, 4679, MBN17, 2010EL_1798,       |
|              | 2010EL_1786, 2010EL_1792, IDHO1726, 4519, 4538,  |
|              | 4661, A488_2, A488_1, PRL64, MBRN14,             |
|              | 4122, 4488, 4600, 4585, 4536,                    |
|              | 4623, 4605, 4593, 4552, 4551,                    |
|              | 4642, 4656, 4646, 4339, 4322,                    |
|              | 4784, 6210, 6215, 6214, 6212,                    |
|              | 6196, 6191, 6195, 6193, 6194,                    |
|              | 6201, 6197, 6180, A482, A483,                    |
|              | A481, 7682, 7684, 7687, 7685,                    |
|              | 7686                                             |
| SNP Position | 749119                                           |
|              | /SNP="G->A"                                      |
|              | /codon_type=Synonymous                           |
|              | /taxa=A4                                         |
| SNP Position | 750723                                           |
|              | /SNP="T->A"                                      |
|              | /codon_type=Intergenic                           |
|              | /taxa=A31, A27, A185, A184, A32,                 |
|              | A177, A29, A180, A232, A231,                     |
|              | A201, A186, A200, A193, A390                     |
| SNP Position | 754743                                           |
|              | /SNP="C->T"                                      |
|              | /codon_type=Intergenic                           |
|              | /taxa=A152, A155, A154                           |
| SNP Position | 756130                                           |
|              | /SNP="A->G"                                      |
|              | /codon_type=Intergenic                           |
|              | /taxa=MG116025, MG116226, 4660, 4675, 4663,      |
|              | 4662, A487_1, A487_2, CIRS101, 4679, MBN17,      |
|              | 2010EL_1798, 2010EL_1786, 2010EL_1792, IDHO1726, |
|              | 4519, 4538, 4661, A488_2, A488_1,                |
|              | PRL64, MBRN14, 4122, 4488, 4600,                 |
|              | 4585, 4536, 4623, 4605, 4593,                    |
|              | 4552, 4551, 4642, 4656, 4646,                    |
|              | 4339, 4322, 4784, 6210, 6215,                    |
|              | 6214, 6212, 6196, 6191, 6195,                    |

|              |                                                  |
|--------------|--------------------------------------------------|
|              | 6193, 6194, 6201, 6197, 6180,                    |
|              | A482, A483, A481, 7682, 7684,                    |
|              | 7687, 7685, 7686, V5, V109,                      |
|              | A130, A131, VC51, V212-1, MJ1485, MJ1236,        |
|              | A346_2, A346_1, B33, 1627, 1346, 1362,           |
|              | 4670, 4672, 4121, 4110, 4111,                    |
|              | 4113, A109, A383, A330, MO10, PRL5,              |
|              | A316, A245, A241, A10                            |
| SNP Position | 757198                                           |
|              | /strand=reverse                                  |
|              | /SNP="G->T"                                      |
|              | /codon_type=Nonsynonymous                        |
|              | /taxa=4784                                       |
| SNP Position | 758025                                           |
|              | /SNP="A->C"                                      |
|              | /codon_type=Nonsynonymous                        |
|              | /taxa=A152, A155, A154                           |
| SNP Position | 760185                                           |
|              | /SNP="G->A"                                      |
|              | /codon_type=Nonsynonymous                        |
|              | /taxa=4784, 6210, 6215, 6214, 6212,              |
|              | 6196, 6191, 6195, 6193, 6194,                    |
|              | 6201, 6197, 6180, A482, A483,                    |
|              | A481, 7682, 7684, 7687, 7685,                    |
|              | 7686                                             |
| SNP Position | 767620                                           |
|              | /SNP="G->A"                                      |
|              | /codon_type=Intergenic                           |
|              | /taxa=A346_2, A346_1                             |
| SNP Position | 768079                                           |
|              | /SNP="C->T"                                      |
|              | /codon_type=Intergenic                           |
|              | /taxa=A383                                       |
| SNP Position | 768875                                           |
|              | /SNP="G->A"                                      |
|              | /codon_type=Nonsynonymous                        |
|              | /taxa=A383, A330, MO10                           |
| SNP Position | 768890                                           |
|              | /SNP="C->T"                                      |
|              | /codon_type=SNOP (non-stop codon to stop condon) |
|              | /taxa=A397                                       |
| SNP Position | 769058                                           |
|              | /SNP="C->T"                                      |
|              | /codon_type=Nonsynonymous                        |
|              | /taxa=MG116025, MG116226, 4660, 4675, 4663,      |
|              | 4662, A487_1, A487_2, CIRS101, 4679, MBN17,      |
|              | 2010EL_1798, 2010EL_1786, 2010EL_1792, IDHO1726, |
|              | 4519, 4538, 4661, A488_2, A488_1,                |
|              | PRL64, MBRN14, 4122, 4488, 4600,                 |
|              | 4585, 4536, 4623, 4605, 4593,                    |
|              | 4552, 4551, 4642, 4656, 4646,                    |
|              | 4339, 4322, 4784, 6210, 6215,                    |
|              | 6214, 6212, 6196, 6191, 6195,                    |

|              |                                                  |
|--------------|--------------------------------------------------|
|              | 6193, 6194, 6201, 6197, 6180,                    |
|              | A482, A483, A481, 7682, 7684,                    |
|              | 7687, 7685, 7686, V5, V109,                      |
|              | A130, A131, VC51, V212-1, MJ1485, MJ1236,        |
|              | A346_2, A346_1, B33, 1627, 1346, 1362,           |
|              | 4670, 4672, 4121, 4110, 4111, 4113               |
| SNP Position | 775461                                           |
|              | /strand=reverse                                  |
|              | /SNP="T->G"                                      |
|              | /codon_type=Nonsynonymous                        |
|              | /taxa=A5, A31, A27, A185, A184,                  |
|              | A32, A177, A29, A180, A232,                      |
|              | A231, A201, A186, A200, A193,                    |
|              | A390, GP145, GP160, GP106, A152,                 |
|              | A155, A154, A4                                   |
| SNP Position | 775752                                           |
|              | /strand=reverse                                  |
|              | /SNP="C->A"                                      |
|              | /codon_type=Nonsynonymous                        |
|              | /taxa=MG116025, MG116226, 4660, 4675, 4663,      |
|              | 4662, A487_1, A487_2, CIRS101, 4679, MBN17,      |
|              | 2010EL_1798, 2010EL_1786, 2010EL_1792, IDHO1726, |
|              | 4519, 4538, 4661, A488_2, A488_1,                |
|              | PRL64, MBRN14, 4122, 4488, 4600,                 |
|              | 4585, 4536, 4623, 4605, 4593,                    |
|              | 4552, 4551, 4642, 4656, 4646,                    |
|              | 4339, 4322, 4784, 6210, 6215,                    |
|              | 6214, 6212, 6196, 6191, 6195,                    |
|              | 6193, 6194, 6201, 6197, 6180,                    |
|              | A482, A483, A481, 7682, 7684,                    |
|              | 7687, 7685, 7686, V5, V109,                      |
|              | A130, A131, VC51, V212-1, MJ1485, MJ1236,        |
|              | A346_2, A346_1, B33, 1627, 1346, 1362,           |
|              | 4670, 4672, 4121, 4110, 4111,                    |
|              | 4113, A109, A383, A330, MO10                     |
| SNP Position | 777043                                           |
|              | /strand=reverse                                  |
|              | /SNP="C->T"                                      |
|              | /codon_type=Nonsynonymous                        |
|              | /taxa=B33, 1627, 1346, 1362                      |
| SNP Position | 777359                                           |
|              | /strand=reverse                                  |
|              | /SNP="A->G"                                      |
|              | /codon_type=Synonymous                           |
|              | /taxa=A4                                         |
| SNP Position | 777387                                           |
|              | /strand=reverse                                  |
|              | /SNP="C->T"                                      |
|              | /codon_type=Nonsynonymous                        |
|              | /taxa=A4                                         |
| SNP Position | 777549                                           |
|              | /strand=reverse                                  |
|              | /SNP="G->A"                                      |



|              |                                                  |
|--------------|--------------------------------------------------|
|              | /codon_type=Nonsynonymous                        |
|              | /taxa=GP60                                       |
| SNP Position | 783276                                           |
|              | /SNP="G->A"                                      |
|              | /codon_type=Synonymous                           |
|              | /taxa=A397                                       |
| SNP Position | 784434                                           |
|              | /SNP="C->T"                                      |
|              | /codon_type=Synonymous                           |
|              | /taxa=MBRN14                                     |
| SNP Position | 790746                                           |
|              | /SNP="T->C"                                      |
|              | /codon_type=Intergenic                           |
|              | /taxa=A4                                         |
| SNP Position | 790967                                           |
|              | /SNP="C->T"                                      |
|              | /codon_type=Synonymous                           |
|              | /taxa=4111                                       |
| SNP Position | 791369                                           |
|              | /SNP="A->G"                                      |
|              | /codon_type=Synonymous                           |
|              | /taxa=A4                                         |
| SNP Position | 795540                                           |
|              | /SNP="G->T"                                      |
|              | /codon_type=Nonsynonymous                        |
|              | /taxa=MG116025, MG116226, 4660, 4675, 4663,      |
|              | 4662, A487_1, A487_2, CIRS101, 4679, MBN17,      |
|              | 2010EL_1798, 2010EL_1786, 2010EL_1792, IDHO1726, |
|              | 4519, 4538, 4661, A488_2, A488_1,                |
|              | PRL64, MBRN14, 4122, 4488, 4600,                 |
|              | 4585, 4536, 4623, 4605, 4593,                    |
|              | 4552, 4551, 4642, 4656, 4646,                    |
|              | 4339, 4322, 4784, 6210, 6215,                    |
|              | 6214, 6212, 6196, 6191, 6195,                    |
|              | 6193, 6194, 6201, 6197, 6180,                    |
|              | A482, A483, A481, 7682, 7684,                    |
|              | 7687, 7685, 7686, V5, V109,                      |
|              | A130, A131, VC51, V212-1, MJ1485, MJ1236,        |
|              | A346_2, A346_1, B33, 1627, 1346, 1362,           |
|              | 4670, 4672, 4121, 4110, 4111,                    |
|              | 4113, A109, A383, A330, MO10, PRL5,              |
|              | A316, A245, A241, A10, GP140                     |
| SNP Position | 795691                                           |
|              | /SNP="G->A"                                      |
|              | /codon_type=Synonymous                           |
|              | /taxa=MJ1485, MJ1236, A346_2, A346_1, B33,       |
|              | 1627, 1346, 1362                                 |
| SNP Position | 798979                                           |
|              | /strand=reverse                                  |
|              | /SNP="T->C"                                      |
|              | /codon_type=Nonsynonymous                        |
|              | /taxa=MBRN14, 4122, 4488, 4600, 4585,            |
|              | 4536, 4623, 4605, 4593, 4552,                    |

|              |                                                     |
|--------------|-----------------------------------------------------|
|              | 4551, 4642, 4656, 4646, 4339, 4322                  |
| SNP Position | 799655                                              |
|              | /strand=reverse                                     |
|              | /SNP="A->G"                                         |
|              | /codon_type=Nonsynonymous                           |
|              | /taxa=A4                                            |
| SNP Position | 799726                                              |
|              | /SNP="C->T"                                         |
|              | /codon_type=Intergenic                              |
|              | /taxa=4663, 4662, A487_1, A487_2, CIRS101,          |
|              | 4679, MBN17, 2010EL_1798, 2010EL_1786, 2010EL_1792, |
|              | IDHO1726, 4519, 4538, 4661, A488_2,                 |
|              | A488_1                                              |
| SNP Position | 800032                                              |
|              | /SNP="T->G"                                         |
|              | /codon_type=Nonsynonymous                           |
|              | /taxa=PRL18                                         |
| SNP Position | 801279                                              |
|              | /SNP="T->C"                                         |
|              | /codon_type=Nonsynonymous                           |
|              | /taxa=A4                                            |
| SNP Position | 803926                                              |
|              | /SNP="A->G"                                         |
|              | /codon_type=Synonymous                              |
|              | /taxa=A397                                          |
| SNP Position | 805327                                              |
|              | /SNP="C->T"                                         |
|              | /codon_type=Synonymous                              |
|              | /taxa=A5, A31, A27, A185, A184,                     |
|              | A32, A177, A29, A180, A232,                         |
|              | A231, A201, A186, A200, A193,                       |
|              | A390                                                |
| SNP Position | 806675                                              |
|              | /SNP="T->G"                                         |
|              | /codon_type=Nonsynonymous                           |
|              | /taxa=A10                                           |
| SNP Position | 806765                                              |
|              | /SNP="A->G"                                         |
|              | /codon_type=Synonymous                              |
|              | /taxa=A4                                            |
| SNP Position | 807595                                              |
|              | /SNP="C->G"                                         |
|              | /codon_type=Nonsynonymous                           |
|              | /taxa=A330                                          |
| SNP Position | 810411                                              |
|              | /SNP="T->G"                                         |
|              | /codon_type=Nonsynonymous                           |
|              | /taxa=4600                                          |
| SNP Position | 818029                                              |
|              | /SNP="G->A"                                         |
|              | /codon_type=Intergenic                              |
|              | /taxa=MG116025, MG116226, 4660, 4675, 4663,         |
|              | 4662, A487_1, A487_2, CIRS101, 4679, MBN17,         |

|              |                                                  |
|--------------|--------------------------------------------------|
|              | 2010EL_1798, 2010EL_1786, 2010EL_1792, IDHO1726, |
|              | 4519, 4538, 4661, A488_2, A488_1,                |
|              | PRL64, MBRN14, 4122, 4488, 4600,                 |
|              | 4585, 4536, 4623, 4605, 4593,                    |
|              | 4552, 4551, 4642, 4656, 4646,                    |
|              | 4339, 4322, 4784, 6210, 6215,                    |
|              | 6214, 6212, 6196, 6191, 6195,                    |
|              | 6193, 6194, 6201, 6197, 6180,                    |
|              | A482, A483, A481, 7682, 7684,                    |
|              | 7687, 7685, 7686, V5, V109,                      |
|              | A130, A131, VC51, V212-1, MJ1485, MJ1236,        |
|              | A346_2, A346_1, B33, 1627, 1346, 1362,           |
|              | 4670, 4672, 4121, 4110, 4111,                    |
|              | 4113, A109, A383, A330, MO10                     |
| SNP Position | 819598                                           |
|              | /strand=reverse                                  |
|              | /SNP="A->T"                                      |
|              | /codon_type=Nonsynonymous                        |
|              | /taxa=MJ1485, MJ1236, A346_2, A346_1, B33,       |
|              | 1627, 1346, 1362                                 |
| SNP Position | 821345                                           |
|              | /SNP="A->G"                                      |
|              | /codon_type=Nonsynonymous                        |
|              | /taxa=A4                                         |
| SNP Position | 822442                                           |
|              | /SNP="A->G"                                      |
|              | /codon_type=Nonsynonymous                        |
|              | /taxa=A383                                       |
| SNP Position | 826948                                           |
|              | /SNP="C->T"                                      |
|              | /codon_type=Nonsynonymous                        |
|              | /taxa=A4                                         |
| SNP Position | 830082                                           |
|              | /SNP="C->T"                                      |
|              | /codon_type=Intergenic                           |
|              | /taxa=PRL18                                      |
| SNP Position | 831783                                           |
|              | /strand=reverse                                  |
|              | /SNP="C->A"                                      |
|              | /codon_type=Nonsynonymous                        |
|              | /taxa=IDHO1726                                   |
| SNP Position | 832486                                           |
|              | /SNP="A->G"                                      |
|              | /codon_type=Nonsynonymous                        |
|              | /taxa=V5                                         |
| SNP Position | 832536                                           |
|              | /SNP="G->A"                                      |
|              | /codon_type=Synonymous                           |
|              | /taxa=4661, A488_2, A488_1                       |
| SNP Position | 834536                                           |
|              | /SNP="C->T"                                      |
|              | /codon_type=Synonymous                           |
|              | /taxa=A4                                         |

|              |                                                  |
|--------------|--------------------------------------------------|
| SNP Position | 837327                                           |
|              | /SNP="C->T"                                      |
|              | /codon_type=Synonymous                           |
|              | /taxa=A4                                         |
| SNP Position | 840677                                           |
|              | /SNP="C->T"                                      |
|              | /codon_type=Intergenic                           |
|              | /taxa=A4                                         |
| SNP Position | 840869                                           |
|              | /strand=reverse                                  |
|              | /SNP="G->T"                                      |
|              | /codon_type=Nonsynonymous                        |
|              | /taxa=4552                                       |
| SNP Position | 841032                                           |
|              | /strand=reverse                                  |
|              | /SNP="A->C"                                      |
|              | /codon_type=Nonsynonymous                        |
|              | /taxa=A4                                         |
| SNP Position | 841084                                           |
|              | /strand=reverse                                  |
|              | /SNP="T->G"                                      |
|              | /codon_type=Nonsynonymous                        |
|              | /taxa=4536                                       |
| SNP Position | 841522                                           |
|              | /strand=reverse                                  |
|              | /SNP="C->T"                                      |
|              | /codon_type=Nonsynonymous                        |
|              | /taxa=A4                                         |
| SNP Position | 841776                                           |
|              | /strand=reverse                                  |
|              | /SNP="G->A"                                      |
|              | /codon_type=Nonsynonymous                        |
|              | /taxa=4519                                       |
| SNP Position | 844674                                           |
|              | /SNP="G->A"                                      |
|              | /codon_type=Intergenic                           |
|              | /taxa=PRL18                                      |
| SNP Position | 847179                                           |
|              | /strand=reverse                                  |
|              | /SNP="C->T"                                      |
|              | /codon_type=Nonsynonymous                        |
|              | /taxa=A5                                         |
| SNP Position | 850188                                           |
|              | /SNP="C->T"                                      |
|              | /codon_type=Intergenic                           |
|              | /taxa=MG116025, MG116226, 4660, 4675, 4663,      |
|              | 4662, A487_1, A487_2, CIRS101, 4679, MBN17,      |
|              | 2010EL_1798, 2010EL_1786, 2010EL_1792, IDHO1726, |
|              | 4519, 4538, 4661, A488_2, A488_1,                |
|              | PRL64, MBRN14, 4122, 4488, 4600,                 |
|              | 4585, 4536, 4623, 4605, 4593,                    |
|              | 4552, 4551, 4642, 4656, 4646,                    |
|              | 4339, 4322, 4784, 6210, 6215,                    |

|              |                                                  |
|--------------|--------------------------------------------------|
|              | 6214, 6212, 6196, 6191, 6195,                    |
|              | 6193, 6194, 6201, 6197, 6180,                    |
|              | A482, A483, A481, 7682, 7684,                    |
|              | 7687, 7685, 7686, V5, V109,                      |
|              | A130, A131, VC51, V212-1, MJ1485, MJ1236,        |
|              | A346_2, A346_1, B33, 1627, 1346, 1362,           |
|              | 4670, 4672, 4121, 4110, 4111,                    |
|              | 4113, A109, A383, A330, MO10, PRL5,              |
|              | A316, A245, A241, A10, GP140, RC9,               |
|              | GP143, GP152, A397, A22, GP60, N16961,           |
|              | A19, A5, A31, A27, A185,                         |
|              | A184, A32, A177, A29, A180,                      |
|              | A232, A231, A201, A186, A200,                    |
|              | A193, A390, GP145, GP160, GP106,                 |
|              | A152, A155, A154, A4, PRL18                      |
| SNP Position | 856642                                           |
|              | /SNP="C->T"                                      |
|              | /codon_type=Nonsynonymous                        |
|              | /taxa=4661, A488_2, A488_1                       |
| SNP Position | 858279                                           |
|              | /SNP="G->A"                                      |
|              | /codon_type=Nonsynonymous                        |
|              | /taxa=A152, A155, A154                           |
| SNP Position | 858380                                           |
|              | /SNP="C->T"                                      |
|              | /codon_type=Synonymous                           |
|              | /taxa=A152, A155, A154                           |
| SNP Position | 858400                                           |
|              | /SNP="C->T"                                      |
|              | /codon_type=Nonsynonymous                        |
|              | /taxa=A383, A330, MO10                           |
| SNP Position | 858526                                           |
|              | /SNP="A->G"                                      |
|              | /codon_type=Intergenic                           |
|              | /taxa=PRL18                                      |
| SNP Position | 858666                                           |
|              | /SNP="T->A"                                      |
|              | /codon_type=Intergenic                           |
|              | /taxa=MG116025, MG116226, 4660, 4675, 4663,      |
|              | 4662, A487_1, A487_2, CIRS101, 4679, MBN17,      |
|              | 2010EL_1798, 2010EL_1786, 2010EL_1792, IDHO1726, |
|              | 4519, 4538, 4661, A488_2, A488_1,                |
|              | PRL64, MBRN14, 4122, 4488, 4600,                 |
|              | 4585, 4536, 4623, 4605, 4593,                    |
|              | 4552, 4551, 4642, 4656, 4646,                    |
|              | 4339, 4322, 4784, 6210, 6215,                    |
|              | 6214, 6212, 6196, 6191, 6195,                    |
|              | 6193, 6194, 6201, 6197, 6180,                    |
|              | A482, A483, A481, 7682, 7684,                    |
|              | 7687, 7685, 7686, V5, V109,                      |
|              | A130, A131, VC51, V212-1, MJ1485, MJ1236,        |
|              | A346_2, A346_1, B33, 1627, 1346, 1362,           |
|              | 4670, 4672, 4121, 4110, 4111, 4113               |

|              |                                                   |
|--------------|---------------------------------------------------|
| SNP Position | 864622                                            |
|              | /SNP="T->C"                                       |
|              | /codon_type=Synonymous                            |
|              | /taxa=A4                                          |
| SNP Position | 865620                                            |
|              | /SNP="G->T"                                       |
|              | /codon_type=Nonsynonymous                         |
|              | /taxa=A130, A131                                  |
| SNP Position | 867307                                            |
|              | /strand=reverse                                   |
|              | /SNP="T->G"                                       |
|              | /codon_type=Synonymous                            |
|              | /taxa=A245                                        |
| SNP Position | 870056                                            |
|              | /strand=reverse                                   |
|              | /SNP="T->C"                                       |
|              | /codon_type=Nonsynonymous                         |
|              | /taxa=A4                                          |
| SNP Position | 874995                                            |
|              | /SNP="C->T"                                       |
|              | /codon_type=Intergenic                            |
|              | /taxa=A152, A155, A154                            |
| SNP Position | 881438                                            |
|              | /SNP="A->G"                                       |
|              | /codon_type=Nonsynonymous                         |
|              | /taxa=4661, A488_2, A488_1                        |
| SNP Position | 883337                                            |
|              | /SNP="A->T"                                       |
|              | /codon_type=Nonsynonymous                         |
|              | /taxa=4552                                        |
| SNP Position | 884096                                            |
|              | /SNP="T->A"                                       |
|              | /codon_type=SNOP (non-stop codon to stop condon)  |
|              | /taxa=MG116025                                    |
| SNP Position | 890234                                            |
|              | /SNP="A->G"                                       |
|              | /codon_type=Intergenic                            |
|              | /taxa=MJ1485, MJ1236                              |
| SNP Position | 890325                                            |
|              | /SNP="C->T"                                       |
|              | /homoplasy=convergence with branch leading to 240 |
|              | /codon_type=Intergenic                            |
|              | /taxa=4660, 4675, 4663, 4662, A487_1,             |
|              | A487_2, CIRS101, 4679, MBN17, 2010EL_1798,        |
|              | 2010EL_1786, 2010EL_1792, IDHO1726, 4519, 4538,   |
|              | 4661, A488_2, A488_1, PRL64, MBRN14,              |
|              | 4122, 4488, 4600, 4585, 4536,                     |
|              | 4623, 4605, 4593, 4552, 4551,                     |
|              | 4642, 4656, 4646, 4339, 4322,                     |
|              | 4784, 6210, 6215, 6214, 6212,                     |
|              | 6196, 6191, 6195, 6193, 6194,                     |
|              | 6201, 6197, 6180, A482, A483,                     |
|              | A481, 7682, 7684, 7687, 7685,                     |

|              |                                                  |
|--------------|--------------------------------------------------|
|              | 7686                                             |
| SNP Position | 890325                                           |
|              | /SNP="C->T"                                      |
|              | /homoplasy=convergence with branch leading to 5  |
|              | /codon_type=Intergenic                           |
|              | /taxa=A130, A131                                 |
| SNP Position | 890712                                           |
|              | /SNP="A->G"                                      |
|              | /codon_type=Nonsynonymous                        |
|              | /taxa=A383                                       |
| SNP Position | 890713                                           |
|              | /SNP="A->G"                                      |
|              | /codon_type=Nonsynonymous                        |
|              | /taxa=6191                                       |
| SNP Position | 890719                                           |
|              | /SNP="G->A"                                      |
|              | /homoplasy=reversal from branch leading to 8     |
|              | /codon_type=Nonsynonymous                        |
|              | /taxa=PRL64                                      |
| SNP Position | 890719                                           |
|              | /SNP="A->G"                                      |
|              | /homoplasy=reversed in branch leading to PRL64   |
|              | /codon_type=Nonsynonymous                        |
|              | /taxa=4675, 4663, 4662, A487_1, A487_2,          |
|              | CIRS101, 4679, MBN17, 2010EL_1798, 2010EL_1786,  |
|              | 2010EL_1792, IDHO1726, 4519, 4538, 4661,         |
|              | A488_2, A488_1, PRL64, MBRN14, 4122,             |
|              | 4488, 4600, 4585, 4536, 4623,                    |
|              | 4605, 4593, 4552, 4551, 4642,                    |
|              | 4656, 4646, 4339, 4322                           |
| SNP Position | 890722                                           |
|              | /SNP="C->A"                                      |
|              | /codon_type=Nonsynonymous                        |
|              | /taxa=MG116025                                   |
| SNP Position | 890994                                           |
|              | /SNP="G->A"                                      |
|              | /codon_type=Nonsynonymous                        |
|              | /taxa=A383                                       |
| SNP Position | 891333                                           |
|              | /SNP="T->C"                                      |
|              | /codon_type=Synonymous                           |
|              | /taxa=A383                                       |
| SNP Position | 891569                                           |
|              | /SNP="G->A"                                      |
|              | /codon_type=Nonsynonymous                        |
|              | /taxa=A4                                         |
| SNP Position | 892321                                           |
|              | /SNP="T->C"                                      |
|              | /codon_type=Nonsynonymous                        |
|              | /taxa=MG116025, MG116226, 4660, 4675, 4663,      |
|              | 4662, A487_1, A487_2, CIRS101, 4679, MBN17,      |
|              | 2010EL_1798, 2010EL_1786, 2010EL_1792, IDHO1726, |
|              | 4519, 4538, 4661, A488_2, A488_1,                |

|              |                                                  |
|--------------|--------------------------------------------------|
|              | PRL64, MBRN14, 4122, 4488, 4600,                 |
|              | 4585, 4536, 4623, 4605, 4593,                    |
|              | 4552, 4551, 4642, 4656, 4646,                    |
|              | 4339, 4322, 4784, 6210, 6215,                    |
|              | 6214, 6212, 6196, 6191, 6195,                    |
|              | 6193, 6194, 6201, 6197, 6180,                    |
|              | A482, A483, A481, 7682, 7684,                    |
|              | 7687, 7685, 7686, V5, V109,                      |
|              | A130, A131, VC51, V212-1, MJ1485, MJ1236,        |
|              | A346_2, A346_1, B33, 1627, 1346, 1362,           |
|              | 4670, 4672, 4121, 4110, 4111,                    |
|              | 4113, A109, A383, A330, MO10, PRL5,              |
|              | A316, A245, A241, A10, GP140, RC9,               |
|              | GP143, GP152, A397, A22, GP60, N16961,           |
|              | A19, A5, A31, A27, A185,                         |
|              | A184, A32, A177, A29, A180,                      |
|              | A232, A231, A201, A186, A200,                    |
|              | A193, A390, GP145, GP160, GP106,                 |
|              | A152, A155, A154, A4, PRL18                      |
| SNP Position | 892871                                           |
|              | /SNP="C->A"                                      |
|              | /codon_type=Nonsynonymous                        |
|              | /taxa=GP145, GP160, GP106                        |
| SNP Position | 893315                                           |
|              | /SNP="G->A"                                      |
|              | /codon_type=Nonsynonymous                        |
|              | /taxa=4784                                       |
| SNP Position | 894789                                           |
|              | /SNP="G->A"                                      |
|              | /codon_type=Nonsynonymous                        |
|              | /taxa=CIRS101                                    |
| SNP Position | 896568                                           |
|              | /SNP="T->G"                                      |
|              | /codon_type=Nonsynonymous                        |
|              | /taxa=MG116025, MG116226, 4660, 4675, 4663,      |
|              | 4662, A487_1, A487_2, CIRS101, 4679, MBN17,      |
|              | 2010EL_1798, 2010EL_1786, 2010EL_1792, IDHO1726, |
|              | 4519, 4538, 4661, A488_2, A488_1,                |
|              | PRL64, MBRN14, 4122, 4488, 4600,                 |
|              | 4585, 4536, 4623, 4605, 4593,                    |
|              | 4552, 4551, 4642, 4656, 4646,                    |
|              | 4339, 4322, 4784, 6210, 6215,                    |
|              | 6214, 6212, 6196, 6191, 6195,                    |
|              | 6193, 6194, 6201, 6197, 6180,                    |
|              | A482, A483, A481, 7682, 7684,                    |
|              | 7687, 7685, 7686, V5, V109,                      |
|              | A130, A131, VC51, V212-1, MJ1485, MJ1236,        |
|              | A346_2, A346_1, B33, 1627, 1346, 1362,           |
|              | 4670, 4672, 4121, 4110, 4111,                    |
|              | 4113, A109, A383, A330, MO10, PRL5,              |
|              | A316, A245, A241, A10, GP140, RC9,               |
|              | GP143, GP152, A397, A22, GP60, N16961,           |
|              | A19, A5, A31, A27, A185,                         |



|              |                                                  |
|--------------|--------------------------------------------------|
|              | A184, A32, A177, A29, A180,                      |
|              | A232, A231, A201, A186, A200,                    |
|              | A193, A390, GP145, GP160, GP106,                 |
|              | A152, A155, A154, A4, PRL18                      |
| SNP Position | 897296                                           |
|              | /SNP="C->T"                                      |
|              | /codon_type=Synonymous                           |
|              | /taxa=PRL18                                      |
| SNP Position | 899519                                           |
|              | /SNP="G->A"                                      |
|              | /codon_type=Nonsynonymous                        |
|              | /taxa=M66, A6                                    |
| SNP Position | 899563                                           |
|              | /SNP="A->G"                                      |
|              | /codon_type=Nonsynonymous                        |
|              | /taxa=A31, A27, A185, A184, A32,                 |
|              | A177, A29, A180, A232, A231,                     |
|              | A201, A186, A200, A193, A390                     |
| SNP Position | 899712                                           |
|              | /SNP="C->T"                                      |
|              | /codon_type=Intergenic                           |
|              | /taxa=A5, A31, A27, A185, A184,                  |
|              | A32, A177, A29, A180, A232,                      |
|              | A231, A201, A186, A200, A193,                    |
|              | A390                                             |
| SNP Position | 899715                                           |
|              | /SNP="C->T"                                      |
|              | /codon_type=Intergenic                           |
|              | /taxa=MG116025, MG116226, 4660, 4675, 4663,      |
|              | 4662, A487_1, A487_2, CIRS101, 4679, MBN17,      |
|              | 2010EL_1798, 2010EL_1786, 2010EL_1792, IDHO1726, |
|              | 4519, 4538, 4661, A488_2, A488_1,                |
|              | PRL64, MBRN14, 4122, 4488, 4600,                 |
|              | 4585, 4536, 4623, 4605, 4593,                    |
|              | 4552, 4551, 4642, 4656, 4646,                    |
|              | 4339, 4322, 4784, 6210, 6215,                    |
|              | 6214, 6212, 6196, 6191, 6195,                    |
|              | 6193, 6194, 6201, 6197, 6180,                    |
|              | A482, A483, A481, 7682, 7684,                    |
|              | 7687, 7685, 7686, V5, V109,                      |
|              | A130, A131, VC51, V212-1, MJ1485, MJ1236,        |
|              | A346_2, A346_1, B33, 1627, 1346, 1362,           |
|              | 4670, 4672, 4121, 4110, 4111,                    |
|              | 4113, A109, A383, A330, MO10, PRL5,              |
|              | A316, A245, A241, A10, GP140, RC9,               |
|              | GP143, GP152, A397, A22, GP60, N16961,           |
|              | A19                                              |
| SNP Position | 899849                                           |
|              | /SNP="T->A"                                      |
|              | /codon_type=Intergenic                           |
|              | /taxa=GP152, A397, A22, GP60                     |
| SNP Position | 900316                                           |
|              | /SNP="A->T"                                      |

|              |                           |
|--------------|---------------------------|
|              | /codon_type=Nonsynonymous |
|              | /taxa=MG116025            |
| SNP Position | 900326                    |
|              | /SNP="G->A"               |
|              | /codon_type=Synonymous    |
|              | /taxa=A130, A131          |
| SNP Position | 902228                    |
|              | /SNP="C->T"               |
|              | /codon_type=Nonsynonymous |
|              | /taxa=M66, A6             |
| SNP Position | 904124                    |
|              | /SNP="C->T"               |
|              | /codon_type=Nonsynonymous |
|              | /taxa=A4                  |
| SNP Position | 904343                    |
|              | /SNP="C->A"               |
|              | /codon_type=Nonsynonymous |
|              | /taxa=A383                |
| SNP Position | 906301                    |
|              | /SNP="T->C"               |
|              | /codon_type=Intergenic    |
|              | /taxa=RC9                 |
| SNP Position | 906861                    |
|              | /SNP="A->G"               |
|              | /codon_type=Nonsynonymous |
|              | /taxa=A4                  |
| SNP Position | 906947                    |
|              | /SNP="A->G"               |
|              | /codon_type=Synonymous    |
|              | /taxa=RC9, GP143          |
| SNP Position | 908572                    |
|              | /SNP="C->T"               |
|              | /codon_type=Nonsynonymous |
|              | /taxa=A245, A241          |
| SNP Position | 913182                    |
|              | /strand=reverse           |
|              | /SNP="G->A"               |
|              | /codon_type=Synonymous    |
|              | /taxa=A383, A330, MO10    |
| SNP Position | 915952                    |
|              | /SNP="G->A"               |
|              | /codon_type=Nonsynonymous |
|              | /taxa=4672                |
| SNP Position | 918801                    |
|              | /strand=reverse           |
|              | /SNP="C->T"               |
|              | /codon_type=Nonsynonymous |
|              | /taxa=A383, A330, MO10    |
| SNP Position | 925217                    |
|              | /SNP="G->A"               |
|              | /codon_type=Nonsynonymous |
|              | /taxa=4679                |
| SNP Position | 925767                    |

|              |                                                  |
|--------------|--------------------------------------------------|
|              | /SNP="C->T"                                      |
|              | /codon_type=Synonymous                           |
|              | /taxa=MG116025, MG116226, 4660, 4675, 4663,      |
|              | 4662, A487_1, A487_2, CIRS101, 4679, MBN17,      |
|              | 2010EL_1798, 2010EL_1786, 2010EL_1792, IDHO1726, |
|              | 4519, 4538, 4661, A488_2, A488_1,                |
|              | PRL64, MBRN14, 4122, 4488, 4600,                 |
|              | 4585, 4536, 4623, 4605, 4593,                    |
|              | 4552, 4551, 4642, 4656, 4646,                    |
|              | 4339, 4322, 4784, 6210, 6215,                    |
|              | 6214, 6212, 6196, 6191, 6195,                    |
|              | 6193, 6194, 6201, 6197, 6180,                    |
|              | A482, A483, A481, 7682, 7684,                    |
|              | 7687, 7685, 7686, V5, V109,                      |
|              | A130, A131, VC51, V212-1, MJ1485, MJ1236,        |
|              | A346_2, A346_1, B33, 1627, 1346, 1362,           |
|              | 4670, 4672, 4121, 4110, 4111, 4113               |
| SNP Position | 929480                                           |
|              | /SNP="C->T"                                      |
|              | /codon_type=Synonymous                           |
|              | /taxa=A152, A155, A154                           |
| SNP Position | 929976                                           |
|              | /strand=reverse                                  |
|              | /SNP="T->C"                                      |
|              | /codon_type=Synonymous                           |
|              | /taxa=GP143                                      |
| SNP Position | 940594                                           |
|              | /strand=reverse                                  |
|              | /SNP="T->C"                                      |
|              | /codon_type=Nonsynonymous                        |
|              | /taxa=A482, A483, A481, 7682, 7684,              |
|              | 7687, 7685, 7686                                 |
| SNP Position | 941124                                           |
|              | /SNP="T->G"                                      |
|              | /codon_type=Intergenic                           |
|              | /taxa=4661                                       |
| SNP Position | 941152                                           |
|              | /SNP="C->G"                                      |
|              | /codon_type=Intergenic                           |
|              | /taxa=4339                                       |
| SNP Position | 948675                                           |
|              | /strand=reverse                                  |
|              | /SNP="T->A"                                      |
|              | /codon_type=Nonsynonymous                        |
|              | /taxa=GP143                                      |
| SNP Position | 949895                                           |
|              | /strand=reverse                                  |
|              | /SNP="G->T"                                      |
|              | /codon_type=Nonsynonymous                        |
|              | /taxa=M66, A6                                    |
| SNP Position | 950133                                           |
|              | /strand=reverse                                  |
|              | /SNP="C->T"                                      |

|              |                           |
|--------------|---------------------------|
|              | /codon_type=Synonymous    |
|              | /taxa=A152, A155, A154    |
| SNP Position | 951536                    |
|              | /SNP="A->C"               |
|              | /codon_type=Nonsynonymous |
|              | /taxa=4519                |
| SNP Position | 952983                    |
|              | /SNP="G->T"               |
|              | /codon_type=Nonsynonymous |
|              | /taxa=4784                |
| SNP Position | 957963                    |
|              | /strand=reverse           |
|              | /SNP="C->T"               |
|              | /codon_type=Synonymous    |
|              | /taxa=A4                  |
| SNP Position | 963139                    |
|              | /strand=reverse           |
|              | /SNP="A->G"               |
|              | /codon_type=Synonymous    |
|              | /taxa=GP145, GP160, GP106 |
| SNP Position | 973296                    |
|              | /SNP="T->C"               |
|              | /codon_type=Intergenic    |
|              | /taxa=MO10                |
| SNP Position | 975395                    |
|              | /SNP="T->G"               |
|              | /codon_type=Nonsynonymous |
|              | /taxa=GP143               |
| SNP Position | 976841                    |
|              | /SNP="A->G"               |
|              | /codon_type=Nonsynonymous |
|              | /taxa=A4                  |
| SNP Position | 978345                    |
|              | /SNP="C->T"               |
|              | /codon_type=Synonymous    |
|              | /taxa=A4                  |
| SNP Position | 980532                    |
|              | /SNP="T->C"               |
|              | /codon_type=Synonymous    |
|              | /taxa=A4                  |
| SNP Position | 980664                    |
|              | /SNP="C->T"               |
|              | /codon_type=Nonsynonymous |
|              | /taxa=A4                  |
| SNP Position | 985906                    |
|              | /SNP="A->C"               |
|              | /codon_type=Nonsynonymous |
|              | /taxa=4784                |
| SNP Position | 986077                    |
|              | /SNP="A->G"               |
|              | /codon_type=Nonsynonymous |
|              | /taxa=A4                  |
| SNP Position | 987559                    |

|              |                                                  |
|--------------|--------------------------------------------------|
|              | /SNP="A->G"                                      |
|              | /codon_type=Nonsynonymous                        |
|              | /taxa=PRL18                                      |
| SNP Position | 988870                                           |
|              | /SNP="C->T"                                      |
|              | /codon_type=Nonsynonymous                        |
|              | /taxa=A245, A241                                 |
| SNP Position | 990223                                           |
|              | /SNP="A->G"                                      |
|              | /codon_type=Nonsynonymous                        |
|              | /taxa=A4                                         |
| SNP Position | 990394                                           |
|              | /SNP="T->G"                                      |
|              | /codon_type=Nonsynonymous                        |
|              | /taxa=A397, A22                                  |
| SNP Position | 991452                                           |
|              | /SNP="A->G"                                      |
|              | /codon_type=Nonsynonymous                        |
|              | /taxa=MBRN14, 4122, 4488, 4600, 4585,            |
|              | 4536, 4623, 4605, 4593, 4552,                    |
|              | 4551, 4642, 4656, 4646, 4339, 4322               |
| SNP Position | 993908                                           |
|              | /SNP="T->C"                                      |
|              | /codon_type=Synonymous                           |
|              | /taxa=4784                                       |
| SNP Position | 994228                                           |
|              | /SNP="A->G"                                      |
|              | /codon_type=Nonsynonymous                        |
|              | /taxa=A4                                         |
| SNP Position | 994234                                           |
|              | /SNP="G->A"                                      |
|              | /codon_type=Nonsynonymous                        |
|              | /taxa=MBRN14, 4122, 4488, 4600, 4585,            |
|              | 4536, 4623, 4605, 4593, 4552,                    |
|              | 4551, 4642, 4656, 4646, 4339, 4322               |
| SNP Position | 996160                                           |
|              | /SNP="A->T"                                      |
|              | /codon_type=Nonsynonymous                        |
|              | /taxa=MG116025, MG116226, 4660, 4675, 4663,      |
|              | 4662, A487_1, A487_2, CIRS101, 4679, MBN17,      |
|              | 2010EL_1798, 2010EL_1786, 2010EL_1792, IDHO1726, |
|              | 4519, 4538, 4661, A488_2, A488_1,                |
|              | PRL64, MBRN14, 4122, 4488, 4600,                 |
|              | 4585, 4536, 4623, 4605, 4593,                    |
|              | 4552, 4551, 4642, 4656, 4646,                    |
|              | 4339, 4322, 4784, 6210, 6215,                    |
|              | 6214, 6212, 6196, 6191, 6195,                    |
|              | 6193, 6194, 6201, 6197, 6180,                    |
|              | A482, A483, A481, 7682, 7684,                    |
|              | 7687, 7685, 7686, V5, V109,                      |
|              | A130, A131, VC51, V212-1, MJ1485, MJ1236,        |
|              | A346_2, A346_1, B33, 1627, 1346, 1362,           |
|              | 4670, 4672, 4121, 4110, 4111,                    |

|              |                                                  |
|--------------|--------------------------------------------------|
|              | 4113, A109, A383, A330, MO10, PRL5,              |
|              | A316, A245, A241, A10, GP140, RC9,               |
|              | GP143, GP152, A397, A22, GP60, N16961,           |
|              | A19, A5, A31, A27, A185,                         |
|              | A184, A32, A177, A29, A180,                      |
|              | A232, A231, A201, A186, A200,                    |
|              | A193, A390, GP145, GP160, GP106,                 |
|              | A152, A155, A154, A4, PRL18                      |
| SNP Position | 998114                                           |
|              | /SNP="C->T"                                      |
|              | /codon_type=Intergenic                           |
|              | /taxa=4784                                       |
| SNP Position | 998749                                           |
|              | /strand=reverse                                  |
|              | /SNP="C->T"                                      |
|              | /codon_type=Nonsynonymous                        |
|              | /taxa=A4                                         |
| SNP Position | 999088                                           |
|              | /SNP="G->A"                                      |
|              | /codon_type=Intergenic                           |
|              | /taxa=A152, A155, A154                           |
| SNP Position | 1017611                                          |
|              | /strand=reverse                                  |
|              | /SNP="C->T"                                      |
|              | /codon_type=Synonymous                           |
|              | /taxa=A482, A483, A481, 7682, 7684,              |
|              | 7687, 7685, 7686                                 |
| SNP Position | 1024409                                          |
|              | /strand=reverse                                  |
|              | /SNP="C->T"                                      |
|              | /codon_type=Synonymous                           |
|              | /taxa=MG116025, MG116226, 4660, 4675, 4663,      |
|              | 4662, A487_1, A487_2, CIRS101, 4679, MBN17,      |
|              | 2010EL_1798, 2010EL_1786, 2010EL_1792, IDHO1726, |
|              | 4519, 4538, 4661, A488_2, A488_1,                |
|              | PRL64, MBRN14, 4122, 4488, 4600,                 |
|              | 4585, 4536, 4623, 4605, 4593,                    |
|              | 4552, 4551, 4642, 4656, 4646,                    |
|              | 4339, 4322, 4784, 6210, 6215,                    |
|              | 6214, 6212, 6196, 6191, 6195,                    |
|              | 6193, 6194, 6201, 6197, 6180,                    |
|              | A482, A483, A481, 7682, 7684,                    |
|              | 7687, 7685, 7686, V5, V109,                      |
|              | A130, A131, VC51, V212-1, MJ1485, MJ1236,        |
|              | A346_2, A346_1, B33, 1627, 1346, 1362,           |
|              | 4670, 4672, 4121, 4110, 4111,                    |
|              | 4113, A109, A383, A330, MO10, PRL5,              |
|              | A316, A245, A241, A10, GP140                     |
| SNP Position | 1033589                                          |
|              | /strand=reverse                                  |
|              | /SNP="G->T"                                      |
|              | /codon_type=Nonsynonymous                        |
|              | /taxa=A152, A155, A154                           |

|              |                                                 |
|--------------|-------------------------------------------------|
| SNP Position | 1040137                                         |
|              | /SNP="T->C"                                     |
|              | /codon_type=Nonsynonymous                       |
|              | /taxa=4339                                      |
| SNP Position | 1043159                                         |
|              | /SNP="C->T"                                     |
|              | /codon_type=Intergenic                          |
|              | /taxa=7682, 7684, 7687, 7685, 7686              |
| SNP Position | 1045354                                         |
|              | /SNP="T->A"                                     |
|              | /codon_type=Intergenic                          |
|              | /taxa=RC9                                       |
| SNP Position | 1046697                                         |
|              | /strand=reverse                                 |
|              | /SNP="C->T"                                     |
|              | /codon_type=Nonsynonymous                       |
|              | /taxa=A4                                        |
| SNP Position | 1047069                                         |
|              | /strand=reverse                                 |
|              | /SNP="C->T"                                     |
|              | /codon_type=SNOP (non-stop codon to stop codon) |
|              | /taxa=4662                                      |
| SNP Position | 1047745                                         |
|              | /strand=reverse                                 |
|              | /SNP="G->T"                                     |
|              | /codon_type=Nonsynonymous                       |
|              | /taxa=4670                                      |
| SNP Position | 1050398                                         |
|              | /SNP="C->T"                                     |
|              | /codon_type=Intergenic                          |
|              | /taxa=4784                                      |
| SNP Position | 1050697                                         |
|              | /SNP="C->T"                                     |
|              | /codon_type=Synonymous                          |
|              | /taxa=A4                                        |
| SNP Position | 1055078                                         |
|              | /strand=reverse                                 |
|              | /SNP="G->A"                                     |
|              | /codon_type=Synonymous                          |
|              | /taxa=RC9                                       |
| SNP Position | 1056538                                         |
|              | /strand=reverse                                 |
|              | /SNP="C->T"                                     |
|              | /codon_type=Nonsynonymous                       |
|              | /taxa=A4                                        |
| SNP Position | 1060034                                         |
|              | /strand=reverse                                 |
|              | /SNP="G->A"                                     |
|              | /codon_type=Synonymous                          |
|              | /taxa=MJ1485, MJ1236, A346_2, A346_1, B33,      |
|              | 1627, 1346, 1362                                |
| SNP Position | 1060414                                         |
|              | /strand=reverse                                 |

|              |                                                     |
|--------------|-----------------------------------------------------|
|              | /SNP="C->T"                                         |
|              | /codon_type=Nonsynonymous                           |
|              | /taxa=4663, 4662, A487_1, A487_2, CIRS101,          |
|              | 4679, MBN17, 2010EL_1798, 2010EL_1786, 2010EL_1792, |
|              | IDHO1726, 4519, 4538                                |
| SNP Position | 1062151                                             |
|              | /SNP="T->C"                                         |
|              | /codon_type=Synonymous                              |
|              | /taxa=M66, A6                                       |
| SNP Position | 1063805                                             |
|              | /SNP="T->G"                                         |
|              | /codon_type=Synonymous                              |
|              | /taxa=4672                                          |
| SNP Position | 1064238                                             |
|              | /SNP="A->G"                                         |
|              | /codon_type=Nonsynonymous                           |
|              | /taxa=A4                                            |
| SNP Position | 1073398                                             |
|              | /SNP="C->A"                                         |
|              | /codon_type=Nonsynonymous                           |
|              | /taxa=A22                                           |
| SNP Position | 1075512                                             |
|              | /SNP="C->T"                                         |
|              | /codon_type=Nonsynonymous                           |
|              | /taxa=A4                                            |
| SNP Position | 1087217                                             |
|              | /SNP="C->T"                                         |
|              | /codon_type=Intergenic                              |
|              | /taxa=V5                                            |
| SNP Position | 1087850                                             |
|              | /SNP="A->G"                                         |
|              | /codon_type=Intergenic                              |
|              | /taxa=A4                                            |
| SNP Position | 1090454                                             |
|              | /SNP="A->G"                                         |
|              | /codon_type=Synonymous                              |
|              | /taxa=A4                                            |
| SNP Position | 1090519                                             |
|              | /SNP="G->C"                                         |
|              | /codon_type=Nonsynonymous                           |
|              | /taxa=GP60                                          |
| SNP Position | 1090528                                             |
|              | /SNP="C->A"                                         |
|              | /codon_type=Nonsynonymous                           |
|              | /taxa=GP145, GP160, GP106                           |
| SNP Position | 1090530                                             |
|              | /SNP="C->A"                                         |
|              | /codon_type=Nonsynonymous                           |
|              | /taxa=4670                                          |
| SNP Position | 1090549                                             |
|              | /SNP="C->T"                                         |
|              | /codon_type=Nonsynonymous                           |
|              | /taxa=A185                                          |



|              |                                                    |
|--------------|----------------------------------------------------|
| SNP Position | 1090549                                            |
|              | /SNP="C->A"                                        |
|              | /codon_type=Nonsynonymous                          |
|              | /taxa=A29                                          |
| SNP Position | 1090558                                            |
|              | /SNP="C->T"                                        |
|              | /codon_type=Nonsynonymous                          |
|              | /taxa=4488                                         |
| SNP Position | 1090566                                            |
|              | /SNP="C->G"                                        |
|              | /codon_type=Nonsynonymous                          |
|              | /taxa=A231                                         |
| SNP Position | 1090573                                            |
|              | /SNP="T->G"                                        |
|              | /codon_type=Nonsynonymous                          |
|              | /taxa=B33                                          |
| SNP Position | 1090579                                            |
|              | /SNP="T->C"                                        |
|              | /codon_type=Nonsynonymous                          |
|              | /taxa=CIRS101                                      |
| SNP Position | 1090599                                            |
|              | /SNP="G->A"                                        |
|              | /codon_type=Nonsynonymous                          |
|              | /taxa=A109                                         |
| SNP Position | 1090632                                            |
|              | /SNP="A->T"                                        |
|              | /codon_type=Nonsynonymous                          |
|              | /taxa=A6                                           |
| SNP Position | 1090684                                            |
|              | /SNP="A->G"                                        |
|              | /codon_type=Nonsynonymous                          |
|              | /taxa=A5                                           |
| SNP Position | 1090697                                            |
|              | /SNP="C->A"                                        |
|              | /codon_type=Nonsynonymous                          |
|              | /taxa=A31                                          |
| SNP Position | 1090735                                            |
|              | /SNP="G->A"                                        |
|              | /codon_type=Nonsynonymous                          |
|              | /taxa=GP145, GP160, GP106                          |
| SNP Position | 1090899                                            |
|              | /SNP="G->A"                                        |
|              | /codon_type=Nonsynonymous                          |
|              | /taxa=GP60                                         |
| SNP Position | 1090935                                            |
|              | /SNP="A->G"                                        |
|              | /codon_type=Nonsynonymous                          |
|              | /taxa=A4                                           |
| SNP Position | 1090938                                            |
|              | /SNP="C->T"                                        |
|              | /homoplasy=convergence with branch leading to A154 |
|              | /codon_type=Nonsynonymous                          |
|              | /taxa=A27                                          |

|              |                                                   |
|--------------|---------------------------------------------------|
| SNP Position | 1090938                                           |
|              | /SNP="C->T"                                       |
|              | /homoplasy=convergence with branch leading to A27 |
|              | /codon_type=Nonsynonymous                         |
|              | /taxa=A154                                        |
| SNP Position | 1091190                                           |
|              | /SNP="G->A"                                       |
|              | /codon_type=Nonsynonymous                         |
|              | /taxa=A152                                        |
| SNP Position | 1091191                                           |
|              | /SNP="A->G"                                       |
|              | /codon_type=Nonsynonymous                         |
|              | /taxa=PRL18                                       |
| SNP Position | 1091206                                           |
|              | /SNP="T->G"                                       |
|              | /codon_type=Nonsynonymous                         |
|              | /taxa=MG116025                                    |
| SNP Position | 1091212                                           |
|              | /SNP="G->A"                                       |
|              | /codon_type=Nonsynonymous                         |
|              | /taxa=MJ1236                                      |
| SNP Position | 1091290                                           |
|              | /SNP="G->A"                                       |
|              | /codon_type=SNOP (non-stop codon to stop condon)  |
|              | /taxa=PRL18                                       |
| SNP Position | 1092385                                           |
|              | /strand=reverse                                   |
|              | /SNP="G->A"                                       |
|              | /codon_type=Nonsynonymous                         |
|              | /taxa=1627, 1346, 1362                            |
| SNP Position | 1094197                                           |
|              | /SNP="G->T"                                       |
|              | /codon_type=Intergenic                            |
|              | /taxa=RC9                                         |
| SNP Position | 1097210                                           |
|              | /SNP="T->A"                                       |
|              | /codon_type=Nonsynonymous                         |
|              | /taxa=4784                                        |
| SNP Position | 1111290                                           |
|              | /SNP="G->T"                                       |
|              | /codon_type=Intergenic                            |
|              | /taxa=MG116025, MG116226, 4660, 4675, 4663,       |
|              | 4662, A487_1, A487_2, CIRS101, 4679, MBN17,       |
|              | 2010EL_1798, 2010EL_1786, 2010EL_1792, IDHO1726,  |
|              | 4519, 4538, 4661, A488_2, A488_1,                 |
|              | PRL64, MBRN14, 4122, 4488, 4600,                  |
|              | 4585, 4536, 4623, 4605, 4593,                     |
|              | 4552, 4551, 4642, 4656, 4646,                     |
|              | 4339, 4322, 4784, 6210, 6215,                     |
|              | 6214, 6212, 6196, 6191, 6195,                     |
|              | 6193, 6194, 6201, 6197, 6180,                     |
|              | A482, A483, A481, 7682, 7684,                     |
|              | 7687, 7685, 7686, V5, V109,                       |

|              |                                                  |
|--------------|--------------------------------------------------|
|              | A130, A131, VC51, V212-1, MJ1485, MJ1236,        |
|              | A346_2, A346_1, B33, 1627, 1346, 1362,           |
|              | 4670, 4672, 4121, 4110, 4111,                    |
|              | 4113, A109, A383, A330, MO10                     |
| SNP Position | 1114658                                          |
|              | /SNP="C->T"                                      |
|              | /codon_type=Intergenic                           |
|              | /taxa=V5                                         |
| SNP Position | 1114747                                          |
|              | /SNP="G->T"                                      |
|              | /codon_type=Intergenic                           |
|              | /taxa=GP143                                      |
| SNP Position | 1116698                                          |
|              | /SNP="C->T"                                      |
|              | /codon_type=Nonsynonymous                        |
|              | /taxa=A346_2, A346_1                             |
| SNP Position | 1116888                                          |
|              | /SNP="G->A"                                      |
|              | /codon_type=Nonsynonymous                        |
|              | /taxa=MG116025, MG116226, 4660, 4675, 4663,      |
|              | 4662, A487_1, A487_2, CIRS101, 4679, MBN17,      |
|              | 2010EL_1798, 2010EL_1786, 2010EL_1792, IDHO1726, |
|              | 4519, 4538, 4661, A488_2, A488_1,                |
|              | PRL64, MBRN14, 4122, 4488, 4600,                 |
|              | 4585, 4536, 4623, 4605, 4593,                    |
|              | 4552, 4551, 4642, 4656, 4646,                    |
|              | 4339, 4322, 4784, 6210, 6215,                    |
|              | 6214, 6212, 6196, 6191, 6195,                    |
|              | 6193, 6194, 6201, 6197, 6180,                    |
|              | A482, A483, A481, 7682, 7684,                    |
|              | 7687, 7685, 7686, V5, V109,                      |
|              | A130, A131, VC51, V212-1, MJ1485, MJ1236,        |
|              | A346_2, A346_1, B33, 1627, 1346, 1362,           |
|              | 4670, 4672, 4121, 4110, 4111,                    |
|              | 4113, A109, A383, A330, MO10, PRL5,              |
|              | A316, A245, A241, A10, GP140, RC9,               |
|              | GP143, GP152, A397, A22, GP60, N16961,           |
|              | A19                                              |
| SNP Position | 1117845                                          |
|              | /SNP="T->G"                                      |
|              | /codon_type=Nonsynonymous                        |
|              | /taxa=IDHO1726                                   |
| SNP Position | 1118272                                          |
|              | /SNP="G->A"                                      |
|              | /codon_type=Synonymous                           |
|              | /taxa=MBRN14, 4122, 4488, 4600, 4585,            |
|              | 4536, 4623, 4605, 4593, 4552,                    |
|              | 4551, 4642, 4656, 4646, 4339, 4322               |
| SNP Position | 1119250                                          |
|              | /strand=reverse                                  |
|              | /SNP="A->T"                                      |
|              | /codon_type=Nonsynonymous                        |
|              | /taxa=A346_2, A346_1                             |

|              |                                                  |
|--------------|--------------------------------------------------|
| SNP Position | 1121773                                          |
|              | /SNP="T->C"                                      |
|              | /codon_type=Synonymous                           |
|              | /taxa=MG116025, MG116226, 4660, 4675, 4663,      |
|              | 4662, A487_1, A487_2, CIRS101, 4679, MBN17,      |
|              | 2010EL_1798, 2010EL_1786, 2010EL_1792, IDHO1726, |
|              | 4519, 4538, 4661, A488_2, A488_1,                |
|              | PRL64, MBRN14, 4122, 4488, 4600,                 |
|              | 4585, 4536, 4623, 4605, 4593,                    |
|              | 4552, 4551, 4642, 4656, 4646,                    |
|              | 4339, 4322, 4784, 6210, 6215,                    |
|              | 6214, 6212, 6196, 6191, 6195,                    |
|              | 6193, 6194, 6201, 6197, 6180,                    |
|              | A482, A483, A481, 7682, 7684,                    |
|              | 7687, 7685, 7686, V5, V109,                      |
|              | A130, A131, VC51, V212-1, MJ1485, MJ1236,        |
|              | A346_2, A346_1, B33, 1627, 1346, 1362,           |
|              | 4670, 4672, 4121, 4110, 4111,                    |
|              | 4113, A109, A383, A330, MO10                     |
| SNP Position | 1122373                                          |
|              | /SNP="G->T"                                      |
|              | /codon_type=Nonsynonymous                        |
|              | /taxa=PRL5                                       |
| SNP Position | 1125913                                          |
|              | /strand=reverse                                  |
|              | /SNP="G->A"                                      |
|              | /codon_type=SNOP (non-stop codon to stop condon) |
|              | /taxa=RC9                                        |
| SNP Position | 1129403                                          |
|              | /strand=reverse                                  |
|              | /SNP="G->A"                                      |
|              | /codon_type=Nonsynonymous                        |
|              | /taxa=6210, 6215, 6214, 6212                     |
| SNP Position | 1131750                                          |
|              | /SNP="C->T"                                      |
|              | /codon_type=Synonymous                           |
|              | /taxa=A316                                       |
| SNP Position | 1133187                                          |
|              | /SNP="G->T"                                      |
|              | /codon_type=Intergenic                           |
|              | /taxa=GP152                                      |
| SNP Position | 1144644                                          |
|              | /SNP="C->T"                                      |
|              | /codon_type=Synonymous                           |
|              | /taxa=4660                                       |
| SNP Position | 1149903                                          |
|              | /SNP="C->T"                                      |
|              | /codon_type=Synonymous                           |
|              | /taxa=MG116025, MG116226, 4660, 4675, 4663,      |
|              | 4662, A487_1, A487_2, CIRS101, 4679, MBN17,      |
|              | 2010EL_1798, 2010EL_1786, 2010EL_1792, IDHO1726, |
|              | 4519, 4538, 4661, A488_2, A488_1,                |
|              | PRL64, MBRN14, 4122, 4488, 4600,                 |

|              |                                                    |
|--------------|----------------------------------------------------|
|              | 4585, 4536, 4623, 4605, 4593,                      |
|              | 4552, 4551, 4642, 4656, 4646,                      |
|              | 4339, 4322, 4784, 6210, 6215,                      |
|              | 6214, 6212, 6196, 6191, 6195,                      |
|              | 6193, 6194, 6201, 6197, 6180,                      |
|              | A482, A483, A481, 7682, 7684,                      |
|              | 7687, 7685, 7686, V5, V109,                        |
|              | A130, A131, VC51, V212-1, MJ1485, MJ1236,          |
|              | A346_2, A346_1, B33, 1627, 1346, 1362,             |
|              | 4670, 4672, 4121, 4110, 4111,                      |
|              | 4113, A109, A383, A330, MO10, PRL5,                |
|              | A316, A245, A241, A10, GP140                       |
| SNP Position | 1154750                                            |
|              | /SNP="C->T"                                        |
|              | /codon_type=Nonsynonymous                          |
|              | /taxa=A186, A200, A193                             |
| SNP Position | 1158888                                            |
|              | /SNP="A->T"                                        |
|              | /codon_type=Nonsynonymous                          |
|              | /taxa=GP145                                        |
| SNP Position | 1162276                                            |
|              | /SNP="A->C"                                        |
|              | /codon_type=Nonsynonymous                          |
|              | /taxa=4536                                         |
| SNP Position | 1170642                                            |
|              | /SNP="G->A"                                        |
|              | /codon_type=Intergenic                             |
|              | /taxa=B33, 1627, 1346, 1362                        |
| SNP Position | 1174930                                            |
|              | /SNP="T->C"                                        |
|              | /codon_type=Nonsynonymous                          |
|              | /taxa=4600, 4585, 4536, 4623                       |
| SNP Position | 1182089                                            |
|              | /SNP="T->C"                                        |
|              | /codon_type=Nonsynonymous                          |
|              | /taxa=A383                                         |
| SNP Position | 1185787                                            |
|              | /strand=reverse                                    |
|              | /SNP="A->T"                                        |
|              | /codon_type=Nonsynonymous                          |
|              | /taxa=MJ1236                                       |
| SNP Position | 1188173                                            |
|              | /SNP="C->T"                                        |
|              | /codon_type=Nonsynonymous                          |
|              | /taxa=4113                                         |
| SNP Position | 1198135                                            |
|              | /SNP="G->A"                                        |
|              | /codon_type=Intergenic                             |
|              | /taxa=B33, 1627, 1346, 1362                        |
| SNP Position | 1198270                                            |
|              | /strand=reverse                                    |
|              | /SNP="C->T"                                        |
|              | /homoplasy=convergence with branch leading to V109 |

|              |                                                       |
|--------------|-------------------------------------------------------|
|              | /codon_type=Nonsynonymous                             |
|              | /taxa=4660, 4675, 4663, 4662, A487_1,                 |
|              | A487_2, CIRS101, 4679, MBN17, 2010EL_1798,            |
|              | 2010EL_1786, 2010EL_1792, IDHO1726, 4519, 4538,       |
|              | 4661, A488_2, A488_1, PRL64, MBRN14,                  |
|              | 4122, 4488, 4600, 4585, 4536,                         |
|              | 4623, 4605, 4593, 4552, 4551,                         |
|              | 4642, 4656, 4646, 4339, 4322,                         |
|              | 4784, 6210, 6215, 6214, 6212,                         |
|              | 6196, 6191, 6195, 6193, 6194,                         |
|              | 6201, 6197, 6180, A482, A483,                         |
|              | A481, 7682, 7684, 7687, 7685,                         |
|              | 7686                                                  |
| SNP Position | 1198270                                               |
|              | /strand=reverse                                       |
|              | /SNP="C->T"                                           |
|              | /homoplasy=convergence with branch leading to 5       |
|              | /codon_type=Nonsynonymous                             |
|              | /taxa=V109                                            |
| SNP Position | 1199115                                               |
|              | /SNP="T->C"                                           |
|              | /codon_type=Intergenic                                |
|              | /taxa=A4                                              |
| SNP Position | 1207460                                               |
|              | /SNP="C->T"                                           |
|              | /codon_type=Nonsynonymous                             |
|              | /taxa=PRL5                                            |
| SNP Position | 1207911                                               |
|              | /SNP="T->C"                                           |
|              | /codon_type=Nonsynonymous                             |
|              | /taxa=A245, A241                                      |
| SNP Position | 1211834                                               |
|              | /SNP="G->A"                                           |
|              | /codon_type=Synonymous                                |
|              | /taxa=4122                                            |
| SNP Position | 1211913                                               |
|              | /SNP="G->C"                                           |
|              | /codon_type=Intergenic                                |
|              | /taxa=2010EL_1798, 2010EL_1786, 2010EL_1792, IDHO1726 |
| SNP Position | 1212075                                               |
|              | /strand=reverse                                       |
|              | /SNP="G->A"                                           |
|              | /codon_type=Nonsynonymous                             |
|              | /taxa=4552                                            |
| SNP Position | 1216033                                               |
|              | /strand=reverse                                       |
|              | /SNP="G->T"                                           |
|              | /codon_type=Synonymous                                |
|              | /taxa=A5, A31, A27, A185, A184,                       |
|              | A32, A177, A29, A180, A232,                           |
|              | A231, A201, A186, A200, A193,                         |
|              | A390, GP145, GP160, GP106, A152,                      |
|              | A155, A154, A4, PRL18                                 |

|              |                                                                                                         |
|--------------|---------------------------------------------------------------------------------------------------------|
| SNP Position | 1221186                                                                                                 |
|              | /strand=reverse                                                                                         |
|              | /SNP="C->T"                                                                                             |
|              | /codon_type=Nonsynonymous                                                                               |
|              | /taxa=GP145, GP160, GP106                                                                               |
| SNP Position | 1221901                                                                                                 |
|              | /strand=reverse                                                                                         |
|              | /SNP="A->G"                                                                                             |
|              | /codon_type=Synonymous                                                                                  |
|              | /taxa=V109                                                                                              |
| SNP Position | 1224173                                                                                                 |
|              | /strand=reverse                                                                                         |
|              | /SNP="T->G"                                                                                             |
|              | /codon_type=Nonsynonymous                                                                               |
|              | /taxa=PRL64                                                                                             |
| SNP Position | 1234387                                                                                                 |
|              | /strand=reverse                                                                                         |
|              | /SNP="C->T"                                                                                             |
|              | /codon_type=Nonsynonymous                                                                               |
|              | /taxa=A397                                                                                              |
| SNP Position | 1241084                                                                                                 |
|              | /strand=reverse                                                                                         |
|              | /SNP="G->T"                                                                                             |
|              | /codon_type=Nonsynonymous                                                                               |
|              | /taxa=A482, A483, A481, 7682, 7684,<br>7687, 7685, 7686                                                 |
| SNP Position | 1252279                                                                                                 |
|              | /strand=reverse                                                                                         |
|              | /SNP="G->T"                                                                                             |
|              | /codon_type=Nonsynonymous                                                                               |
|              | /taxa=M66, A6                                                                                           |
| SNP Position | 1254767                                                                                                 |
|              | /strand=reverse                                                                                         |
|              | /SNP="A->G"                                                                                             |
|              | /codon_type=Nonsynonymous                                                                               |
|              | /taxa=A4                                                                                                |
| SNP Position | 1255464                                                                                                 |
|              | /strand=reverse                                                                                         |
|              | /SNP="C->A"                                                                                             |
|              | /codon_type=Nonsynonymous                                                                               |
|              | /taxa=A6                                                                                                |
| SNP Position | 1262261                                                                                                 |
|              | /strand=reverse                                                                                         |
|              | /SNP="C->T"                                                                                             |
|              | /codon_type=Synonymous                                                                                  |
|              | /taxa=A5, A31, A27, A185, A184,<br>A32, A177, A29, A180, A232,<br>A231, A201, A186, A200, A193,<br>A390 |
| SNP Position | 1263491                                                                                                 |
|              | /strand=reverse                                                                                         |
|              | /SNP="A->G"                                                                                             |
|              | /codon_type=Synonymous                                                                                  |

|              |                                                         |
|--------------|---------------------------------------------------------|
|              | /taxa=4121, 4110, 4111, 4113                            |
| SNP Position | 1265183                                                 |
|              | /strand=reverse                                         |
|              | /SNP="A->G"                                             |
|              | /codon_type=Synonymous                                  |
|              | /taxa=A383                                              |
| SNP Position | 1266132                                                 |
|              | /SNP="A->G"                                             |
|              | /codon_type=Intergenic                                  |
|              | /taxa=4121, 4110, 4111, 4113                            |
| SNP Position | 1266572                                                 |
|              | /strand=reverse                                         |
|              | /SNP="G->A"                                             |
|              | /codon_type=Synonymous                                  |
|              | /taxa=A482, A483, A481, 7682, 7684,<br>7687, 7685, 7686 |
| SNP Position | 1269128                                                 |
|              | /strand=reverse                                         |
|              | /SNP="C->T"                                             |
|              | /codon_type=Nonsynonymous                               |
|              | /taxa=A383, A330, MO10                                  |
| SNP Position | 1269147                                                 |
|              | /strand=reverse                                         |
|              | /SNP="C->T"                                             |
|              | /codon_type=Synonymous                                  |
|              | /taxa=GP152                                             |
| SNP Position | 1273461                                                 |
|              | /SNP="C->A"                                             |
|              | /codon_type=Synonymous                                  |
|              | /taxa=PRL18                                             |
| SNP Position | 1273701                                                 |
|              | /SNP="G->A"                                             |
|              | /codon_type=Nonsynonymous                               |
|              | /taxa=A4                                                |
| SNP Position | 1279342                                                 |
|              | /strand=reverse                                         |
|              | /SNP="T->C"                                             |
|              | /codon_type=Nonsynonymous                               |
|              | /taxa=A4                                                |
| SNP Position | 1280976                                                 |
|              | /strand=reverse                                         |
|              | /SNP="C->T"                                             |
|              | /codon_type=Nonsynonymous                               |
|              | /taxa=GP152                                             |
| SNP Position | 1281512                                                 |
|              | /strand=reverse                                         |
|              | /SNP="G->A"                                             |
|              | /codon_type=Nonsynonymous                               |
|              | /taxa=GP152, A397, A22                                  |
| SNP Position | 1285653                                                 |
|              | /SNP="T->C"                                             |
|              | /codon_type=Synonymous                                  |
|              | /taxa=A397, A22                                         |



|              |                                             |
|--------------|---------------------------------------------|
| SNP Position | 1287937                                     |
|              | /strand=reverse                             |
|              | /SNP="C->T"                                 |
|              | /codon_type=Nonsynonymous                   |
|              | /taxa=4670                                  |
| SNP Position | 1294800                                     |
|              | /SNP="T->G"                                 |
|              | /codon_type=Nonsynonymous                   |
|              | /taxa=4121, 4110, 4111, 4113                |
| SNP Position | 1296501                                     |
|              | /SNP="C->T"                                 |
|              | /codon_type=Nonsynonymous                   |
|              | /taxa=B33, 1627, 1346, 1362                 |
| SNP Position | 1304630                                     |
|              | /strand=reverse                             |
|              | /SNP="C->T"                                 |
|              | /codon_type=Synonymous                      |
|              | /taxa=PRL18                                 |
| SNP Position | 1305544                                     |
|              | /strand=reverse                             |
|              | /SNP="T->C"                                 |
|              | /codon_type=Synonymous                      |
|              | /taxa=B33, 1627, 1346, 1362                 |
| SNP Position | 1308881                                     |
|              | /strand=reverse                             |
|              | /SNP="C->T"                                 |
|              | /codon_type=Nonsynonymous                   |
|              | /taxa=GP152, A397, A22                      |
| SNP Position | 1315183                                     |
|              | /SNP="G->A"                                 |
|              | /codon_type=Synonymous                      |
|              | /taxa=B33, 1627, 1346, 1362                 |
| SNP Position | 1317879                                     |
|              | /SNP="G->C"                                 |
|              | /codon_type=Intergenic                      |
|              | /taxa=VC51, V212-1, MJ1485, MJ1236, A346_2, |
|              | A346_1, B33, 1627, 1346, 1362, 4670,        |
|              | 4672, 4121, 4110, 4111, 4113                |
| SNP Position | 1327608                                     |
|              | /strand=reverse                             |
|              | /SNP="A->G"                                 |
|              | /codon_type=Synonymous                      |
|              | /taxa=A4                                    |
| SNP Position | 1329397                                     |
|              | /strand=reverse                             |
|              | /SNP="G->A"                                 |
|              | /codon_type=Synonymous                      |
|              | /taxa=GP152                                 |
| SNP Position | 1330462                                     |
|              | /SNP="A->C"                                 |
|              | /codon_type=Nonsynonymous                   |
|              | /taxa=A346_2, A346_1, B33, 1627, 1346,      |
|              | 1362                                        |

|              |                                                    |
|--------------|----------------------------------------------------|
| SNP Position | 1330463                                            |
|              | /SNP="G->T"                                        |
|              | /homoplasy=convergence with branch leading to A383 |
|              | /codon_type=Nonsynonymous                          |
|              | /taxa=4675, 4663, 4662, A487_1, A487_2,            |
|              | CIRS101, 4679, MBN17, 2010EL_1798, 2010EL_1786,    |
|              | 2010EL_1792, IDHO1726, 4519, 4538, 4661,           |
|              | A488_2, A488_1, PRL64, MBRN14, 4122,               |
|              | 4488, 4600, 4585, 4536, 4623,                      |
|              | 4605, 4593, 4552, 4551, 4642,                      |
|              | 4656, 4646, 4339, 4322, 4784,                      |
|              | 6210, 6215, 6214, 6212, 6196,                      |
|              | 6191, 6195, 6193, 6194, 6201,                      |
|              | 6197, 6180, A482, A483, A481,                      |
|              | 7682, 7684, 7687, 7685, 7686                       |
| SNP Position | 1330463                                            |
|              | /SNP="G->T"                                        |
|              | /homoplasy=convergence with branch leading to 7    |
|              | /codon_type=Nonsynonymous                          |
|              | /taxa=A383                                         |
| SNP Position | 1336264                                            |
|              | /SNP="A->G"                                        |
|              | /codon_type=Nonsynonymous                          |
|              | /taxa=A4                                           |
| SNP Position | 1344021                                            |
|              | /SNP="C->T"                                        |
|              | /codon_type=Nonsynonymous                          |
|              | /taxa=MBRN14, 4122, 4488, 4600, 4585,              |
|              | 4536, 4623, 4605, 4593, 4552,                      |
|              | 4551, 4642, 4656, 4646, 4339, 4322                 |
| SNP Position | 1356757                                            |
|              | /SNP="T->C"                                        |
|              | /codon_type=Intergenic                             |
|              | /taxa=PRL18                                        |
| SNP Position | 1359187                                            |
|              | /SNP="G->A"                                        |
|              | /codon_type=Nonsynonymous                          |
|              | /taxa=CIRS101, 4679, MBN17, 2010EL_1798,           |
|              | 2010EL_1786, 2010EL_1792, IDHO1726, 4519, 4538     |
| SNP Position | 1360772                                            |
|              | /SNP="T->C"                                        |
|              | /codon_type=Nonsynonymous                          |
|              | /taxa=4605, 4593, 4552, 4551                       |
| SNP Position | 1363379                                            |
|              | /strand=reverse                                    |
|              | /SNP="A->G"                                        |
|              | /codon_type=Nonsynonymous                          |
|              | /taxa=A4                                           |
| SNP Position | 1363966                                            |
|              | /strand=reverse                                    |
|              | /SNP="A->G"                                        |
|              | /codon_type=Synonymous                             |
|              | /taxa=A4                                           |

|              |                                                 |
|--------------|-------------------------------------------------|
| SNP Position | 1368686                                         |
|              | /strand=reverse                                 |
|              | /SNP="G->A"                                     |
|              | /codon_type=Nonsynonymous                       |
|              | /taxa=4660, 4675, 4663, 4662, A487_1,           |
|              | A487_2, CIRS101, 4679, MBN17, 2010EL_1798,      |
|              | 2010EL_1786, 2010EL_1792, IDHO1726, 4519, 4538, |
|              | 4661, A488_2, A488_1, PRL64, MBRN14,            |
|              | 4122, 4488, 4600, 4585, 4536,                   |
|              | 4623, 4605, 4593, 4552, 4551,                   |
|              | 4642, 4656, 4646, 4339, 4322,                   |
|              | 4784, 6210, 6215, 6214, 6212,                   |
|              | 6196, 6191, 6195, 6193, 6194,                   |
|              | 6201, 6197, 6180, A482, A483,                   |
|              | A481, 7682, 7684, 7687, 7685,                   |
|              | 7686                                            |
| SNP Position | 1373908                                         |
|              | /strand=reverse                                 |
|              | /SNP="T->A"                                     |
|              | /codon_type=Nonsynonymous                       |
|              | /taxa=MJ1485, MJ1236, A346_2, A346_1, B33,      |
|              | 1627, 1346, 1362                                |
| SNP Position | 1381191                                         |
|              | /strand=reverse                                 |
|              | /SNP="A->G"                                     |
|              | /codon_type=Synonymous                          |
|              | /taxa=4585                                      |
| SNP Position | 1382680                                         |
|              | /strand=reverse                                 |
|              | /SNP="A->G"                                     |
|              | /codon_type=Nonsynonymous                       |
|              | /taxa=4121, 4110                                |
| SNP Position | 1382893                                         |
|              | /SNP="C->T"                                     |
|              | /codon_type=Intergenic                          |
|              | /taxa=A4                                        |
| SNP Position | 1395635                                         |
|              | /strand=reverse                                 |
|              | /SNP="C->T"                                     |
|              | /codon_type=Nonsynonymous                       |
|              | /taxa=4784, 6210, 6215, 6214, 6212,             |
|              | 6196, 6191, 6195, 6193, 6194,                   |
|              | 6201, 6197, 6180, A482, A483,                   |
|              | A481, 7682, 7684, 7687, 7685,                   |
|              | 7686                                            |
| SNP Position | 1397469                                         |
|              | /SNP="C->T"                                     |
|              | /codon_type=Synonymous                          |
|              | /taxa=A482, A483, A481, 7682, 7684,             |
|              | 7687, 7685, 7686                                |
| SNP Position | 1398108                                         |
|              | /SNP="C->A"                                     |
|              | /codon_type=Synonymous                          |

|              |                                                  |
|--------------|--------------------------------------------------|
|              | /taxa=4672                                       |
| SNP Position | 1400592                                          |
|              | /strand=reverse                                  |
|              | /SNP="C->T"                                      |
|              | /codon_type=Nonsynonymous                        |
|              | /taxa=PRL18                                      |
| SNP Position | 1401879                                          |
|              | /strand=reverse                                  |
|              | /SNP="A->T"                                      |
|              | /codon_type=Nonsynonymous                        |
|              | /taxa=MG116025, MG116226, 4660, 4675, 4663,      |
|              | 4662, A487_1, A487_2, CIRS101, 4679, MBN17,      |
|              | 2010EL_1798, 2010EL_1786, 2010EL_1792, IDHO1726, |
|              | 4519, 4538, 4661, A488_2, A488_1,                |
|              | PRL64, MBRN14, 4122, 4488, 4600,                 |
|              | 4585, 4536, 4623, 4605, 4593,                    |
|              | 4552, 4551, 4642, 4656, 4646,                    |
|              | 4339, 4322, 4784, 6210, 6215,                    |
|              | 6214, 6212, 6196, 6191, 6195,                    |
|              | 6193, 6194, 6201, 6197, 6180,                    |
|              | A482, A483, A481, 7682, 7684,                    |
|              | 7687, 7685, 7686, V5, V109,                      |
|              | A130, A131, VC51, V212-1, MJ1485, MJ1236,        |
|              | A346_2, A346_1, B33, 1627, 1346, 1362,           |
|              | 4670, 4672, 4121, 4110, 4111,                    |
|              | 4113, A109, A383, A330, MO10                     |
| SNP Position | 1402970                                          |
|              | /strand=reverse                                  |
|              | /SNP="G->T"                                      |
|              | /codon_type=Nonsynonymous                        |
|              | /taxa=N16961                                     |
| SNP Position | 1408800                                          |
|              | /SNP="G->A"                                      |
|              | /codon_type=Intergenic                           |
|              | /taxa=A32                                        |
| SNP Position | 1409690                                          |
|              | /SNP="C->T"                                      |
|              | /codon_type=Nonsynonymous                        |
|              | /taxa=GP140                                      |
| SNP Position | 1409737                                          |
|              | /SNP="C->A"                                      |
|              | /codon_type=Nonsynonymous                        |
|              | /taxa=PRL5                                       |
| SNP Position | 1417110                                          |
|              | /strand=reverse                                  |
|              | /SNP="C->A"                                      |
|              | /codon_type=Nonsynonymous                        |
|              | /taxa=4784, 6210, 6215, 6214, 6212,              |
|              | 6196, 6191, 6195, 6193, 6194,                    |
|              | 6201, 6197, 6180, A482, A483,                    |
|              | A481, 7682, 7684, 7687, 7685,                    |
|              | 7686                                             |
| SNP Position | 1417928                                          |

|              |                                                                                                                                                                                                                                                                                                                                                                                                                                                                                                                                                                                                                      |
|--------------|----------------------------------------------------------------------------------------------------------------------------------------------------------------------------------------------------------------------------------------------------------------------------------------------------------------------------------------------------------------------------------------------------------------------------------------------------------------------------------------------------------------------------------------------------------------------------------------------------------------------|
|              | /strand=reverse                                                                                                                                                                                                                                                                                                                                                                                                                                                                                                                                                                                                      |
|              | /SNP="T->G"                                                                                                                                                                                                                                                                                                                                                                                                                                                                                                                                                                                                          |
|              | /codon_type=Synonymous                                                                                                                                                                                                                                                                                                                                                                                                                                                                                                                                                                                               |
|              | /taxa=RC9, GP143                                                                                                                                                                                                                                                                                                                                                                                                                                                                                                                                                                                                     |
| SNP Position | 1418195                                                                                                                                                                                                                                                                                                                                                                                                                                                                                                                                                                                                              |
|              | /strand=reverse                                                                                                                                                                                                                                                                                                                                                                                                                                                                                                                                                                                                      |
|              | /SNP="A->G"                                                                                                                                                                                                                                                                                                                                                                                                                                                                                                                                                                                                          |
|              | /codon_type=Synonymous                                                                                                                                                                                                                                                                                                                                                                                                                                                                                                                                                                                               |
|              | /taxa=MG116025, MG116226, 4660, 4675, 4663,<br>4662, A487_1, A487_2, CIRS101, 4679, MBN17,<br>2010EL_1798, 2010EL_1786, 2010EL_1792, IDHO1726,<br>4519, 4538, 4661, A488_2, A488_1,<br>PRL64, MBRN14, 4122, 4488, 4600,<br>4585, 4536, 4623, 4605, 4593,<br>4552, 4551, 4642, 4656, 4646,<br>4339, 4322, 4784, 6210, 6215,<br>6214, 6212, 6196, 6191, 6195,<br>6193, 6194, 6201, 6197, 6180,<br>A482, A483, A481, 7682, 7684,<br>7687, 7685, 7686, V5, V109,<br>A130, A131, VC51, V212-1, MJ1485, MJ1236,<br>A346_2, A346_1, B33, 1627, 1346, 1362,<br>4670, 4672, 4121, 4110, 4111,<br>4113, A109, A383, A330, MO10 |
| SNP Position | 1418484                                                                                                                                                                                                                                                                                                                                                                                                                                                                                                                                                                                                              |
|              | /SNP="T->C"                                                                                                                                                                                                                                                                                                                                                                                                                                                                                                                                                                                                          |
|              | /codon_type=Intergenic                                                                                                                                                                                                                                                                                                                                                                                                                                                                                                                                                                                               |
|              | /taxa=A130, A131                                                                                                                                                                                                                                                                                                                                                                                                                                                                                                                                                                                                     |
| SNP Position | 1418807                                                                                                                                                                                                                                                                                                                                                                                                                                                                                                                                                                                                              |
|              | /SNP="G->T"                                                                                                                                                                                                                                                                                                                                                                                                                                                                                                                                                                                                          |
|              | /codon_type=Intergenic                                                                                                                                                                                                                                                                                                                                                                                                                                                                                                                                                                                               |
|              | /taxa=4663, 4662, A487_1, A487_2, CIRS101,<br>4679, MBN17, 2010EL_1798, 2010EL_1786, 2010EL_1792,<br>IDHO1726, 4519, 4538, 4661, A488_2,<br>A488_1                                                                                                                                                                                                                                                                                                                                                                                                                                                                   |
| SNP Position | 1418822                                                                                                                                                                                                                                                                                                                                                                                                                                                                                                                                                                                                              |
|              | /SNP="A->G"                                                                                                                                                                                                                                                                                                                                                                                                                                                                                                                                                                                                          |
|              | /codon_type=Intergenic                                                                                                                                                                                                                                                                                                                                                                                                                                                                                                                                                                                               |
|              | /taxa=A383                                                                                                                                                                                                                                                                                                                                                                                                                                                                                                                                                                                                           |
| SNP Position | 1422030                                                                                                                                                                                                                                                                                                                                                                                                                                                                                                                                                                                                              |
|              | /SNP="T->C"                                                                                                                                                                                                                                                                                                                                                                                                                                                                                                                                                                                                          |
|              | /codon_type=Intergenic                                                                                                                                                                                                                                                                                                                                                                                                                                                                                                                                                                                               |
|              | /taxa=4121, 4110, 4111, 4113                                                                                                                                                                                                                                                                                                                                                                                                                                                                                                                                                                                         |
| SNP Position | 1422964                                                                                                                                                                                                                                                                                                                                                                                                                                                                                                                                                                                                              |
|              | /SNP="C->T"                                                                                                                                                                                                                                                                                                                                                                                                                                                                                                                                                                                                          |
|              | /codon_type=Synonymous                                                                                                                                                                                                                                                                                                                                                                                                                                                                                                                                                                                               |
|              | /taxa=A245, A241                                                                                                                                                                                                                                                                                                                                                                                                                                                                                                                                                                                                     |
| SNP Position | 1423585                                                                                                                                                                                                                                                                                                                                                                                                                                                                                                                                                                                                              |
|              | /SNP="C->T"                                                                                                                                                                                                                                                                                                                                                                                                                                                                                                                                                                                                          |
|              | /codon_type=Synonymous                                                                                                                                                                                                                                                                                                                                                                                                                                                                                                                                                                                               |
|              | /taxa=PRL18                                                                                                                                                                                                                                                                                                                                                                                                                                                                                                                                                                                                          |
| SNP Position | 1435705                                                                                                                                                                                                                                                                                                                                                                                                                                                                                                                                                                                                              |
|              | /strand=reverse                                                                                                                                                                                                                                                                                                                                                                                                                                                                                                                                                                                                      |

|              |                                                  |
|--------------|--------------------------------------------------|
|              | /SNP="C->T"                                      |
|              | /codon_type=Synonymous                           |
|              | /taxa=A4                                         |
| SNP Position | 1436263                                          |
|              | /strand=reverse                                  |
|              | /SNP="C->T"                                      |
|              | /codon_type=Synonymous                           |
|              | /taxa=A245, A241                                 |
| SNP Position | 1441242                                          |
|              | /SNP="G->A"                                      |
|              | /codon_type=Intergenic                           |
|              | /taxa=MG116025, MG116226, 4660, 4675, 4663,      |
|              | 4662, A487_1, A487_2, CIRS101, 4679, MBN17,      |
|              | 2010EL_1798, 2010EL_1786, 2010EL_1792, IDHO1726, |
|              | 4519, 4538, 4661, A488_2, A488_1,                |
|              | PRL64, MBRN14, 4122, 4488, 4600,                 |
|              | 4585, 4536, 4623, 4605, 4593,                    |
|              | 4552, 4551, 4642, 4656, 4646,                    |
|              | 4339, 4322, 4784, 6210, 6215,                    |
|              | 6214, 6212, 6196, 6191, 6195,                    |
|              | 6193, 6194, 6201, 6197, 6180,                    |
|              | A482, A483, A481, 7682, 7684,                    |
|              | 7687, 7685, 7686, V5, V109,                      |
|              | A130, A131, VC51, V212-1, MJ1485, MJ1236,        |
|              | A346_2, A346_1, B33, 1627, 1346, 1362,           |
|              | 4670, 4672, 4121, 4110, 4111,                    |
|              | 4113, A109, A383, A330, MO10, PRL5,              |
|              | A316, A245, A241, A10, GP140                     |
| SNP Position | 1444449                                          |
|              | /SNP="G->A"                                      |
|              | /codon_type=Synonymous                           |
|              | /taxa=A130, A131                                 |
| SNP Position | 1452764                                          |
|              | /SNP="T->C"                                      |
|              | /codon_type=Nonsynonymous                        |
|              | /taxa=PRL64, MBRN14, 4122, 4488, 4600,           |
|              | 4585, 4536, 4623, 4605, 4593,                    |
|              | 4552, 4551, 4642, 4656, 4646,                    |
|              | 4339, 4322                                       |
| SNP Position | 1457193                                          |
|              | /strand=reverse                                  |
|              | /SNP="G->A"                                      |
|              | /codon_type=Synonymous                           |
|              | /taxa=A383, A330, MO10                           |
| SNP Position | 1457519                                          |
|              | /strand=reverse                                  |
|              | /SNP="T->A"                                      |
|              | /codon_type=Nonsynonymous                        |
|              | /taxa=B33, 1627, 1346, 1362                      |
| SNP Position | 1462630                                          |
|              | /SNP="T->C"                                      |
|              | /codon_type=Nonsynonymous                        |
|              | /taxa=A397                                       |

|              |                                                  |
|--------------|--------------------------------------------------|
| SNP Position | 1466928                                          |
|              | /strand=reverse                                  |
|              | /SNP="A->T"                                      |
|              | /codon_type=Synonymous                           |
|              | /taxa=A5, A31, A27, A185, A184,                  |
|              | A32, A177, A29, A180, A232,                      |
|              | A231, A201, A186, A200, A193,                    |
|              | A390                                             |
| SNP Position | 1467059                                          |
|              | /strand=reverse                                  |
|              | /SNP="C->T"                                      |
|              | /codon_type=Nonsynonymous                        |
|              | /taxa=MJ1485, MJ1236, A346_2, A346_1, B33,       |
|              | 1627, 1346, 1362                                 |
| SNP Position | 1469436                                          |
|              | /SNP="A->T"                                      |
|              | /codon_type=Nonsynonymous                        |
|              | /taxa=MG116025, MG116226, 4660, 4675, 4663,      |
|              | 4662, A487_1, A487_2, CIRS101, 4679, MBN17,      |
|              | 2010EL_1798, 2010EL_1786, 2010EL_1792, IDHO1726, |
|              | 4519, 4538, 4661, A488_2, A488_1,                |
|              | PRL64, MBRN14, 4122, 4488, 4600,                 |
|              | 4585, 4536, 4623, 4605, 4593,                    |
|              | 4552, 4551, 4642, 4656, 4646,                    |
|              | 4339, 4322, 4784, 6210, 6215,                    |
|              | 6214, 6212, 6196, 6191, 6195,                    |
|              | 6193, 6194, 6201, 6197, 6180,                    |
|              | A482, A483, A481, 7682, 7684,                    |
|              | 7687, 7685, 7686, V5, V109,                      |
|              | A130, A131, VC51, V212-1, MJ1485, MJ1236,        |
|              | A346_2, A346_1, B33, 1627, 1346, 1362,           |
|              | 4670, 4672, 4121, 4110, 4111,                    |
|              | 4113, A109, A383, A330, MO10, PRL5,              |
|              | A316, A245, A241, A10                            |
| SNP Position | 1469597                                          |
|              | /SNP="C->T"                                      |
|              | /codon_type=SNOP (non-stop codon to stop condon) |
|              | /taxa=PRL18                                      |
| SNP Position | 1472551                                          |
|              | /strand=reverse                                  |
|              | /SNP="C->T"                                      |
|              | /codon_type=Nonsynonymous                        |
|              | /taxa=6210, 6215, 6214, 6212                     |
| SNP Position | 1473651                                          |
|              | /SNP="C->T"                                      |
|              | /codon_type=Nonsynonymous                        |
|              | /taxa=V5                                         |
| SNP Position | 1476103                                          |
|              | /SNP="C->T"                                      |
|              | /codon_type=Synonymous                           |
|              | /taxa=MG116025                                   |
| SNP Position | 1476801                                          |
|              | /SNP="C->T"                                      |

|              |                              |
|--------------|------------------------------|
|              | /codon_type=Nonsynonymous    |
|              | /taxa=GP60                   |
| SNP Position | 1481020                      |
|              | /strand=reverse              |
|              | /SNP="G->A"                  |
|              | /codon_type=Nonsynonymous    |
|              | /taxa=4661, A488_2, A488_1   |
| SNP Position | 1481520                      |
|              | /strand=reverse              |
|              | /SNP="T->C"                  |
|              | /codon_type=Synonymous       |
|              | /taxa=4121, 4110, 4111, 4113 |
| SNP Position | 1481609                      |
|              | /SNP="C->T"                  |
|              | /codon_type=Intergenic       |
|              | /taxa=A4                     |
| SNP Position | 1483449                      |
|              | /SNP="C->G"                  |
|              | /codon_type=Synonymous       |
|              | /taxa=4121, 4110, 4111, 4113 |
| SNP Position | 1487442                      |
|              | /strand=reverse              |
|              | /SNP="T->A"                  |
|              | /codon_type=Nonsynonymous    |
|              | /taxa=4122                   |
| SNP Position | 1491861                      |
|              | /strand=reverse              |
|              | /SNP="G->T"                  |
|              | /codon_type=Nonsynonymous    |
|              | /taxa=A397                   |
| SNP Position | 1501888                      |
|              | /SNP="C->T"                  |
|              | /codon_type=Nonsynonymous    |
|              | /taxa=GP60                   |
| SNP Position | 1504479                      |
|              | /SNP="G->T"                  |
|              | /codon_type=Synonymous       |
|              | /taxa=PRL5                   |
| SNP Position | 1510235                      |
|              | /SNP="G->A"                  |
|              | /codon_type=Intergenic       |
|              | /taxa=4111, 4113             |
| SNP Position | 1513879                      |
|              | /SNP="G->A"                  |
|              | /codon_type=Nonsynonymous    |
|              | /taxa=A383, A330, MO10       |
| SNP Position | 1520785                      |
|              | /SNP="A->G"                  |
|              | /codon_type=Intergenic       |
|              | /taxa=A4                     |
| SNP Position | 1522728                      |
|              | /strand=reverse              |
|              | /SNP="G->A"                  |



|              |                                                  |
|--------------|--------------------------------------------------|
|              | /codon_type=Synonymous                           |
|              | /taxa=A383, A330, MO10                           |
| SNP Position | 1526955                                          |
|              | /SNP="G->A"                                      |
|              | /codon_type=Intergenic                           |
|              | /taxa=6210, 6215, 6214, 6212, 6196,              |
|              | 6191, 6195, 6193, 6194, 6201,                    |
|              | 6197, 6180                                       |
| SNP Position | 1530305                                          |
|              | /strand=reverse                                  |
|              | /SNP="C->T"                                      |
|              | /codon_type=Nonsynonymous                        |
|              | /taxa=A397, A22                                  |
| SNP Position | 1532920                                          |
|              | /strand=reverse                                  |
|              | /SNP="C->T"                                      |
|              | /codon_type=Nonsynonymous                        |
|              | /taxa=A4                                         |
| SNP Position | 1536242                                          |
|              | /strand=reverse                                  |
|              | /SNP="T->C"                                      |
|              | /codon_type=Synonymous                           |
|              | /taxa=GP143                                      |
| SNP Position | 1539733                                          |
|              | /SNP="A->G"                                      |
|              | /codon_type=Intergenic                           |
|              | /taxa=A4                                         |
| SNP Position | 1540216                                          |
|              | /SNP="C->T"                                      |
|              | /codon_type=Intergenic                           |
|              | /taxa=MO10                                       |
| SNP Position | 1540518                                          |
|              | /SNP="G->A"                                      |
|              | /codon_type=Nonsynonymous                        |
|              | /taxa=V109                                       |
| SNP Position | 1547519                                          |
|              | /strand=reverse                                  |
|              | /SNP="G->T"                                      |
|              | /codon_type=Nonsynonymous                        |
|              | /taxa=A397                                       |
| SNP Position | 1548643                                          |
|              | /strand=reverse                                  |
|              | /SNP="A->G"                                      |
|              | /codon_type=Synonymous                           |
|              | /taxa=MG116025, MG116226, 4660, 4675, 4663,      |
|              | 4662, A487_1, A487_2, CIRS101, 4679, MBN17,      |
|              | 2010EL_1798, 2010EL_1786, 2010EL_1792, IDHO1726, |
|              | 4519, 4538, 4661, A488_2, A488_1,                |
|              | PRL64, MBRN14, 4122, 4488, 4600,                 |
|              | 4585, 4536, 4623, 4605, 4593,                    |
|              | 4552, 4551, 4642, 4656, 4646,                    |
|              | 4339, 4322, 4784, 6210, 6215,                    |
|              | 6214, 6212, 6196, 6191, 6195,                    |

|              |                                     |
|--------------|-------------------------------------|
|              | 6193, 6194, 6201, 6197, 6180,       |
|              | A482, A483, A481, 7682, 7684,       |
|              | 7687, 7685, 7686, V5, V109          |
| SNP Position | 1553009                             |
|              | /SNP="G->A"                         |
|              | /codon_type=Nonsynonymous           |
|              | /taxa=A390                          |
| SNP Position | 1553152                             |
|              | /SNP="T->C"                         |
|              | /codon_type=Synonymous              |
|              | /taxa=4784, 6210, 6215, 6214, 6212, |
|              | 6196, 6191, 6195, 6193, 6194,       |
|              | 6201, 6197, 6180, A482, A483,       |
|              | A481, 7682, 7684, 7687, 7685,       |
|              | 7686                                |
| SNP Position | 1553155                             |
|              | /SNP="C->T"                         |
|              | /codon_type=Synonymous              |
|              | /taxa=4784, 6210, 6215, 6214, 6212, |
|              | 6196, 6191, 6195, 6193, 6194,       |
|              | 6201, 6197, 6180, A482, A483,       |
|              | A481, 7682, 7684, 7687, 7685,       |
|              | 7686                                |
| SNP Position | 1553231                             |
|              | /SNP="G->C"                         |
|              | /codon_type=Nonsynonymous           |
|              | /taxa=4784, 6210, 6215, 6214, 6212, |
|              | 6196, 6191, 6195, 6193, 6194,       |
|              | 6201, 6197, 6180, A482, A483,       |
|              | A481, 7682, 7684, 7687, 7685,       |
|              | 7686                                |
| SNP Position | 1553232                             |
|              | /SNP="C->T"                         |
|              | /codon_type=Nonsynonymous           |
|              | /taxa=4784, 6210, 6215, 6214, 6212, |
|              | 6196, 6191, 6195, 6193, 6194,       |
|              | 6201, 6197, 6180, A482, A483,       |
|              | A481, 7682, 7684, 7687, 7685,       |
|              | 7686                                |
| SNP Position | 1553237                             |
|              | /SNP="T->G"                         |
|              | /codon_type=Nonsynonymous           |
|              | /taxa=4784, 6210, 6215, 6214, 6212, |
|              | 6196, 6191, 6195, 6193, 6194,       |
|              | 6201, 6197, 6180, A482, A483,       |
|              | A481, 7682, 7684, 7687, 7685,       |
|              | 7686                                |
| SNP Position | 1553242                             |
|              | /SNP="T->C"                         |
|              | /codon_type=Synonymous              |
|              | /taxa=4784, 6210, 6215, 6214, 6212, |
|              | 6196, 6191, 6195, 6193, 6194,       |
|              | 6201, 6197, 6180, A482, A483,       |

|              |                                                          |
|--------------|----------------------------------------------------------|
|              | A481, 7682, 7684, 7687, 7685,                            |
|              | 7686                                                     |
| SNP Position | 1553903                                                  |
|              | /SNP="G->A"                                              |
|              | /codon_type=Nonsynonymous                                |
|              | /taxa=B33, 1627, 1346, 1362                              |
| SNP Position | 1557936                                                  |
|              | /SNP="A->G"                                              |
|              | /codon_type=Nonsynonymous                                |
|              | /taxa=A4                                                 |
| SNP Position | 1562814                                                  |
|              | /SNP="T->C"                                              |
|              | /codon_type=Nonsynonymous                                |
|              | /taxa=A397, A22                                          |
| SNP Position | 1563760                                                  |
|              | /SNP="G->A"                                              |
|              | /codon_type=SNOP (non-stop codon to stop condon)         |
|              | /taxa=4675, 4663, 4662, A487_1, A487_2,                  |
|              | CIRS101, 4679, MBN17, 2010EL_1798, 2010EL_1786,          |
|              | 2010EL_1792, IDHO1726, 4519, 4538, 4661,                 |
|              | A488_2, A488_1                                           |
| SNP Position | 1564047                                                  |
|              | /SNP="A->G"                                              |
|              | /codon_type=Intergenic                                   |
|              | /taxa=4672                                               |
| SNP Position | 1564137                                                  |
|              | /SNP="G->A"                                              |
|              | /homoplasy=reversal from branch leading to 119,          |
|              | convergence with branch leading to 223, convergence with |
|              | branch leading to 231                                    |
|              | /codon_type=Intergenic                                   |
|              | /taxa=4660, 4675, 4663, 4662, A487_1,                    |
|              | A487_2, CIRS101, 4679, MBN17, 2010EL_1798,               |
|              | 2010EL_1786, 2010EL_1792, IDHO1726, 4519, 4538,          |
|              | 4661, A488_2, A488_1, PRL64, MBRN14,                     |
|              | 4122, 4488, 4600, 4585, 4536,                            |
|              | 4623, 4605, 4593, 4552, 4551,                            |
|              | 4642, 4656, 4646, 4339, 4322,                            |
|              | 4784, 6210, 6215, 6214, 6212,                            |
|              | 6196, 6191, 6195, 6193, 6194,                            |
|              | 6201, 6197, 6180, A482, A483,                            |
|              | A481, 7682, 7684, 7687, 7685,                            |
|              | 7686                                                     |
| SNP Position | 1564137                                                  |
|              | /SNP="G->A"                                              |
|              | /homoplasy=reversal from branch leading to 119,          |
|              | convergence with branch leading to 5, convergence with   |
|              | branch leading to 231                                    |
|              | /codon_type=Intergenic                                   |
|              | /taxa=B33, 1627, 1346, 1362                              |
| SNP Position | 1564137                                                  |
|              | /SNP="G->A"                                              |
|              | /homoplasy=reversal from branch leading to 119,          |

|              |                                                          |
|--------------|----------------------------------------------------------|
|              | convergence with branch leading to 5, convergence with   |
|              | branch leading to 223                                    |
|              | /codon_type=Intergenic                                   |
|              | /taxa=4672, 4121, 4110, 4111, 4113                       |
| SNP Position | 1564137                                                  |
|              | /SNP="A->G"                                              |
|              | /homoplasy=reversed in branch leading to 5, reversed in  |
|              | branch leading to 223, reversed in branch leading to 231 |
|              | /codon_type=Intergenic                                   |
|              | /taxa=MG116025, MG116226, 4660, 4675, 4663,              |
|              | 4662, A487_1, A487_2, CIRS101, 4679, MBN17,              |
|              | 2010EL_1798, 2010EL_1786, 2010EL_1792, IDHO1726,         |
|              | 4519, 4538, 4661, A488_2, A488_1,                        |
|              | PRL64, MBRN14, 4122, 4488, 4600,                         |
|              | 4585, 4536, 4623, 4605, 4593,                            |
|              | 4552, 4551, 4642, 4656, 4646,                            |
|              | 4339, 4322, 4784, 6210, 6215,                            |
|              | 6214, 6212, 6196, 6191, 6195,                            |
|              | 6193, 6194, 6201, 6197, 6180,                            |
|              | A482, A483, A481, 7682, 7684,                            |
|              | 7687, 7685, 7686, V5, V109,                              |
|              | A130, A131, VC51, V212-1, MJ1485, MJ1236,                |
|              | A346_2, A346_1, B33, 1627, 1346, 1362,                   |
|              | 4670, 4672, 4121, 4110, 4111, 4113                       |
| SNP Position | 1564138                                                  |
|              | /SNP="C->T"                                              |
|              | /codon_type=Intergenic                                   |
|              | /taxa=4111, 4113                                         |
| SNP Position | 1564152                                                  |
|              | /SNP="G->A"                                              |
|              | /codon_type=Intergenic                                   |
|              | /taxa=B33, 1627, 1346, 1362                              |
| SNP Position | 1564154                                                  |
|              | /SNP="A->G"                                              |
|              | /codon_type=Intergenic                                   |
|              | /taxa=B33, 1627, 1346, 1362                              |
| SNP Position | 1564569                                                  |
|              | /strand=reverse                                          |
|              | /SNP="G->A"                                              |
|              | /codon_type=Synonymous                                   |
|              | /taxa=B33, 1627, 1346, 1362                              |
| SNP Position | 1564572                                                  |
|              | /strand=reverse                                          |
|              | /SNP="T->C"                                              |
|              | /codon_type=Synonymous                                   |
|              | /taxa=B33, 1627, 1346, 1362                              |
| SNP Position | 1564689                                                  |
|              | /strand=reverse                                          |
|              | /SNP="G->A"                                              |
|              | /codon_type=Synonymous                                   |
|              | /taxa=4538                                               |
| SNP Position | 1564752                                                  |
|              | /strand=reverse                                          |

|              |                                                    |
|--------------|----------------------------------------------------|
|              | /SNP="T->C"                                        |
|              | /homoplasy=convergence with branch leading to A383 |
|              | /codon_type=Synonymous                             |
|              | /taxa=B33, 1627, 1346, 1362                        |
| SNP Position | 1564752                                            |
|              | /strand=reverse                                    |
|              | /SNP="T->C"                                        |
|              | /homoplasy=convergence with branch leading to 223  |
|              | /codon_type=Synonymous                             |
|              | /taxa=A383                                         |
| SNP Position | 1564760                                            |
|              | /strand=reverse                                    |
|              | /SNP="T->C"                                        |
|              | /codon_type=Nonsynonymous                          |
|              | /taxa=B33, 1627, 1346, 1362                        |
| SNP Position | 1564771                                            |
|              | /strand=reverse                                    |
|              | /SNP="G->A"                                        |
|              | /codon_type=Nonsynonymous                          |
|              | /taxa=B33, 1627, 1346, 1362                        |
| SNP Position | 1564814                                            |
|              | /strand=reverse                                    |
|              | /SNP="C->G"                                        |
|              | /codon_type=Nonsynonymous                          |
|              | /taxa=A383                                         |
| SNP Position | 1564972                                            |
|              | /SNP="A->C"                                        |
|              | /homoplasy=convergence with branch leading to 171  |
|              | /codon_type=Intergenic                             |
|              | /taxa=1627                                         |
| SNP Position | 1564972                                            |
|              | /SNP="A->C"                                        |
|              | /homoplasy=convergence with branch leading to 1627 |
|              | /codon_type=Intergenic                             |
|              | /taxa=A186, A200, A193                             |
| SNP Position | 1564981                                            |
|              | /SNP="A->G"                                        |
|              | /homoplasy=convergence with branch leading to 171  |
|              | /codon_type=Intergenic                             |
|              | /taxa=1627                                         |
| SNP Position | 1564981                                            |
|              | /SNP="A->G"                                        |
|              | /homoplasy=convergence with branch leading to 1627 |
|              | /codon_type=Intergenic                             |
|              | /taxa=A186, A200, A193                             |
| SNP Position | 1564987                                            |
|              | /SNP="G->A"                                        |
|              | /homoplasy=convergence with branch leading to 171  |
|              | /codon_type=Intergenic                             |
|              | /taxa=1627                                         |
| SNP Position | 1564987                                            |
|              | /SNP="G->A"                                        |
|              | /homoplasy=convergence with branch leading to 1627 |

|              |                                                                                                                                                                                                                                                                                                                                                                                                                                                                                                                                                                                                                                                                                                                                                                                                                                                                            |
|--------------|----------------------------------------------------------------------------------------------------------------------------------------------------------------------------------------------------------------------------------------------------------------------------------------------------------------------------------------------------------------------------------------------------------------------------------------------------------------------------------------------------------------------------------------------------------------------------------------------------------------------------------------------------------------------------------------------------------------------------------------------------------------------------------------------------------------------------------------------------------------------------|
|              | /codon_type=Intergenic                                                                                                                                                                                                                                                                                                                                                                                                                                                                                                                                                                                                                                                                                                                                                                                                                                                     |
|              | /taxa=A186, A200, A193                                                                                                                                                                                                                                                                                                                                                                                                                                                                                                                                                                                                                                                                                                                                                                                                                                                     |
| SNP Position | 1565020                                                                                                                                                                                                                                                                                                                                                                                                                                                                                                                                                                                                                                                                                                                                                                                                                                                                    |
|              | /SNP="A->G"                                                                                                                                                                                                                                                                                                                                                                                                                                                                                                                                                                                                                                                                                                                                                                                                                                                                |
|              | /homoplasy=convergence with branch leading to A18                                                                                                                                                                                                                                                                                                                                                                                                                                                                                                                                                                                                                                                                                                                                                                                                                          |
|              | /codon_type=Intergenic                                                                                                                                                                                                                                                                                                                                                                                                                                                                                                                                                                                                                                                                                                                                                                                                                                                     |
|              | /taxa=1346, 1362                                                                                                                                                                                                                                                                                                                                                                                                                                                                                                                                                                                                                                                                                                                                                                                                                                                           |
| SNP Position | 1565020                                                                                                                                                                                                                                                                                                                                                                                                                                                                                                                                                                                                                                                                                                                                                                                                                                                                    |
|              | /SNP="A->G"                                                                                                                                                                                                                                                                                                                                                                                                                                                                                                                                                                                                                                                                                                                                                                                                                                                                |
|              | /homoplasy=convergence with branch leading to 227                                                                                                                                                                                                                                                                                                                                                                                                                                                                                                                                                                                                                                                                                                                                                                                                                          |
|              | /codon_type=Intergenic                                                                                                                                                                                                                                                                                                                                                                                                                                                                                                                                                                                                                                                                                                                                                                                                                                                     |
|              | /taxa=A18                                                                                                                                                                                                                                                                                                                                                                                                                                                                                                                                                                                                                                                                                                                                                                                                                                                                  |
| SNP Position | 1565140                                                                                                                                                                                                                                                                                                                                                                                                                                                                                                                                                                                                                                                                                                                                                                                                                                                                    |
|              | /SNP="G->A"                                                                                                                                                                                                                                                                                                                                                                                                                                                                                                                                                                                                                                                                                                                                                                                                                                                                |
|              | /codon_type=Intergenic                                                                                                                                                                                                                                                                                                                                                                                                                                                                                                                                                                                                                                                                                                                                                                                                                                                     |
|              | /taxa=B33, 1627, 1346, 1362                                                                                                                                                                                                                                                                                                                                                                                                                                                                                                                                                                                                                                                                                                                                                                                                                                                |
| SNP Position | 1565221                                                                                                                                                                                                                                                                                                                                                                                                                                                                                                                                                                                                                                                                                                                                                                                                                                                                    |
|              | /SNP="A->G"                                                                                                                                                                                                                                                                                                                                                                                                                                                                                                                                                                                                                                                                                                                                                                                                                                                                |
|              | /codon_type=Intergenic                                                                                                                                                                                                                                                                                                                                                                                                                                                                                                                                                                                                                                                                                                                                                                                                                                                     |
|              | /taxa=MG116025, MG116226, 4660, 4675, 4663,<br>4662, A487_1, A487_2, CIRS101, 4679, MBN17,<br>2010EL_1798, 2010EL_1786, 2010EL_1792, IDHO1726,<br>4519, 4538, 4661, A488_2, A488_1,<br>PRL64, MBRN14, 4122, 4488, 4600,<br>4585, 4536, 4623, 4605, 4593,<br>4552, 4551, 4642, 4656, 4646,<br>4339, 4322, 4784, 6210, 6215,<br>6214, 6212, 6196, 6191, 6195,<br>6193, 6194, 6201, 6197, 6180,<br>A482, A483, A481, 7682, 7684,<br>7687, 7685, 7686, V5, V109,<br>A130, A131, VC51, V212-1, MJ1485, MJ1236,<br>A346_2, A346_1, B33, 1627, 1346, 1362,<br>4670, 4672, 4121, 4110, 4111,<br>4113, A109, A383, A330, MO10, PRL5,<br>A316, A245, A241, A10, GP140, RC9,<br>GP143, GP152, A397, A22, GP60, N16961,<br>A19, A5, A31, A27, A185,<br>A184, A32, A177, A29, A180,<br>A232, A231, A201, A186, A200,<br>A193, A390, GP145, GP160, GP106,<br>A152, A155, A154, A4, PRL18 |
| SNP Position | 1565260                                                                                                                                                                                                                                                                                                                                                                                                                                                                                                                                                                                                                                                                                                                                                                                                                                                                    |
|              | /SNP="G->A"                                                                                                                                                                                                                                                                                                                                                                                                                                                                                                                                                                                                                                                                                                                                                                                                                                                                |
|              | /codon_type=Intergenic                                                                                                                                                                                                                                                                                                                                                                                                                                                                                                                                                                                                                                                                                                                                                                                                                                                     |
|              | /taxa=B33, 1627, 1346, 1362                                                                                                                                                                                                                                                                                                                                                                                                                                                                                                                                                                                                                                                                                                                                                                                                                                                |
| SNP Position | 1566728                                                                                                                                                                                                                                                                                                                                                                                                                                                                                                                                                                                                                                                                                                                                                                                                                                                                    |
|              | /SNP="T->C"                                                                                                                                                                                                                                                                                                                                                                                                                                                                                                                                                                                                                                                                                                                                                                                                                                                                |
|              | /codon_type=Intergenic                                                                                                                                                                                                                                                                                                                                                                                                                                                                                                                                                                                                                                                                                                                                                                                                                                                     |
|              | /taxa=VC51, V212-1, MJ1485, MJ1236, A346_2,<br>A346_1, B33, 1627, 1346, 1362, 4670,<br>4672, 4121, 4110, 4111, 4113                                                                                                                                                                                                                                                                                                                                                                                                                                                                                                                                                                                                                                                                                                                                                        |
| SNP Position | 1566729                                                                                                                                                                                                                                                                                                                                                                                                                                                                                                                                                                                                                                                                                                                                                                                                                                                                    |

|              |                                                    |
|--------------|----------------------------------------------------|
|              | /SNP="A->T"                                        |
|              | /codon_type=Intergenic                             |
|              | /taxa=VC51, V212-1, MJ1485, MJ1236, A346_2,        |
|              | A346_1, B33, 1627, 1346, 1362, 4670,               |
|              | 4672, 4121, 4110, 4111, 4113                       |
| SNP Position | 1566753                                            |
|              | /SNP="C->T"                                        |
|              | /homoplasy=convergence with branch leading to A383 |
|              | /codon_type=Intergenic                             |
|              | /taxa=VC51, V212-1, MJ1485, MJ1236, A346_2,        |
|              | A346_1, B33, 1627, 1346, 1362, 4670,               |
|              | 4672, 4121, 4110, 4111, 4113                       |
| SNP Position | 1566753                                            |
|              | /SNP="C->T"                                        |
|              | /homoplasy=convergence with branch leading to 209  |
|              | /codon_type=Intergenic                             |
|              | /taxa=A383                                         |
| SNP Position | 1566755                                            |
|              | /SNP="G->T"                                        |
|              | /homoplasy=reversal from branch leading to 121     |
|              | /codon_type=Intergenic                             |
|              | /taxa=MG116025, MG116226, 4660, 4675, 4663,        |
|              | 4662, A487_1, A487_2, CIRS101, 4679, MBN17,        |
|              | 2010EL_1798, 2010EL_1786, 2010EL_1792, IDHO1726,   |
|              | 4519, 4538, 4661, A488_2, A488_1,                  |
|              | PRL64, MBRN14, 4122, 4488, 4600,                   |
|              | 4585, 4536, 4623, 4605, 4593,                      |
|              | 4552, 4551, 4642, 4656, 4646,                      |
|              | 4339, 4322, 4784, 6210, 6215,                      |
|              | 6214, 6212, 6196, 6191, 6195,                      |
|              | 6193, 6194, 6201, 6197, 6180,                      |
|              | A482, A483, A481, 7682, 7684,                      |
|              | 7687, 7685, 7686, V5, V109,                        |
|              | A130, A131                                         |
| SNP Position | 1566755                                            |
|              | /SNP="T->G"                                        |
|              | /homoplasy=reversed in branch leading to 118       |
|              | /codon_type=Intergenic                             |
|              | /taxa=MG116025, MG116226, 4660, 4675, 4663,        |
|              | 4662, A487_1, A487_2, CIRS101, 4679, MBN17,        |
|              | 2010EL_1798, 2010EL_1786, 2010EL_1792, IDHO1726,   |
|              | 4519, 4538, 4661, A488_2, A488_1,                  |
|              | PRL64, MBRN14, 4122, 4488, 4600,                   |
|              | 4585, 4536, 4623, 4605, 4593,                      |
|              | 4552, 4551, 4642, 4656, 4646,                      |
|              | 4339, 4322, 4784, 6210, 6215,                      |
|              | 6214, 6212, 6196, 6191, 6195,                      |
|              | 6193, 6194, 6201, 6197, 6180,                      |
|              | A482, A483, A481, 7682, 7684,                      |
|              | 7687, 7685, 7686, V5, V109,                        |
|              | A130, A131, VC51, V212-1, MJ1485, MJ1236,          |
|              | A346_2, A346_1, B33, 1627, 1346, 1362,             |
|              | 4670, 4672, 4121, 4110, 4111,                      |

|              |                                                    |
|--------------|----------------------------------------------------|
|              | 4113, A109, A383, A330, MO10                       |
| SNP Position | 1566832                                            |
|              | /SNP="G->T"                                        |
|              | /homoplasy=convergence with branch leading to A383 |
|              | /codon_type=Intergenic                             |
|              | /taxa=1627, 1346, 1362                             |
| SNP Position | 1566832                                            |
|              | /SNP="G->T"                                        |
|              | /homoplasy=convergence with branch leading to 225  |
|              | /codon_type=Intergenic                             |
|              | /taxa=A383                                         |
| SNP Position | 1566848                                            |
|              | /SNP="A->C"                                        |
|              | /homoplasy=reversal from branch leading to 209     |
|              | /codon_type=Intergenic                             |
|              | /taxa=1627, 1346, 1362                             |
| SNP Position | 1566848                                            |
|              | /SNP="C->A"                                        |
|              | /homoplasy=reversed in branch leading to 225       |
|              | /codon_type=Intergenic                             |
|              | /taxa=VC51, V212-1, MJ1485, MJ1236, A346_2,        |
|              | A346_1, B33, 1627, 1346, 1362, 4670,               |
|              | 4672, 4121, 4110, 4111, 4113                       |
| SNP Position | 1566856                                            |
|              | /SNP="C->A"                                        |
|              | /codon_type=Intergenic                             |
|              | /taxa=RC9                                          |
| SNP Position | 1567151                                            |
|              | /strand=reverse                                    |
|              | /SNP="A->G"                                        |
|              | /homoplasy=convergence with branch leading to 209, |
|              | convergence with branch leading to A383            |
|              | /codon_type=Nonsynonymous                          |
|              | /taxa=4660, 4675, 4663, 4662, A487_1,              |
|              | A487_2, CIRS101, 4679, MBN17, 2010EL_1798,         |
|              | 2010EL_1786, 2010EL_1792, IDHO1726, 4519, 4538,    |
|              | 4661, A488_2, A488_1, PRL64, MBRN14,               |
|              | 4122, 4488, 4600, 4585, 4536,                      |
|              | 4623, 4605, 4593, 4552, 4551,                      |
|              | 4642, 4656, 4646, 4339, 4322,                      |
|              | 4784, 6210, 6215, 6214, 6212,                      |
|              | 6196, 6191, 6195, 6193, 6194,                      |
|              | 6201, 6197, 6180, A482, A483,                      |
|              | A481, 7682, 7684, 7687, 7685,                      |
|              | 7686                                               |
| SNP Position | 1567151                                            |
|              | /strand=reverse                                    |
|              | /SNP="A->G"                                        |
|              | /homoplasy=convergence with branch leading to 5,   |
|              | convergence with branch leading to A383            |
|              | /codon_type=Nonsynonymous                          |
|              | /taxa=VC51, V212-1, MJ1485, MJ1236, A346_2,        |
|              | A346_1, B33, 1627, 1346, 1362, 4670,               |



|              |                                                                                                                                                                                                                                                                                                                                                                                                                               |
|--------------|-------------------------------------------------------------------------------------------------------------------------------------------------------------------------------------------------------------------------------------------------------------------------------------------------------------------------------------------------------------------------------------------------------------------------------|
|              | 4672, 4121, 4110, 4111, 4113                                                                                                                                                                                                                                                                                                                                                                                                  |
| SNP Position | 1567151                                                                                                                                                                                                                                                                                                                                                                                                                       |
|              | /strand=reverse                                                                                                                                                                                                                                                                                                                                                                                                               |
|              | /SNP="A->G"                                                                                                                                                                                                                                                                                                                                                                                                                   |
|              | /homoplasy=convergence with branch leading to 5,<br>convergence with branch leading to 209                                                                                                                                                                                                                                                                                                                                    |
|              | /codon_type=Nonsynonymous                                                                                                                                                                                                                                                                                                                                                                                                     |
|              | /taxa=A383                                                                                                                                                                                                                                                                                                                                                                                                                    |
| SNP Position | 1567239                                                                                                                                                                                                                                                                                                                                                                                                                       |
|              | /strand=reverse                                                                                                                                                                                                                                                                                                                                                                                                               |
|              | /SNP="A->G"                                                                                                                                                                                                                                                                                                                                                                                                                   |
|              | /homoplasy=convergence with branch leading to 209                                                                                                                                                                                                                                                                                                                                                                             |
|              | /codon_type=Nonsynonymous                                                                                                                                                                                                                                                                                                                                                                                                     |
|              | /taxa=4660, 4675, 4663, 4662, A487_1,<br>A487_2, CIRS101, 4679, MBN17, 2010EL_1798,<br>2010EL_1786, 2010EL_1792, IDHO1726, 4519, 4538,<br>4661, A488_2, A488_1, PRL64, MBRN14,<br>4122, 4488, 4600, 4585, 4536,<br>4623, 4605, 4593, 4552, 4551,<br>4642, 4656, 4646, 4339, 4322,<br>4784, 6210, 6215, 6214, 6212,<br>6196, 6191, 6195, 6193, 6194,<br>6201, 6197, 6180, A482, A483,<br>A481, 7682, 7684, 7687, 7685,<br>7686 |
| SNP Position | 1567239                                                                                                                                                                                                                                                                                                                                                                                                                       |
|              | /strand=reverse                                                                                                                                                                                                                                                                                                                                                                                                               |
|              | /SNP="A->G"                                                                                                                                                                                                                                                                                                                                                                                                                   |
|              | /homoplasy=convergence with branch leading to 5                                                                                                                                                                                                                                                                                                                                                                               |
|              | /codon_type=Nonsynonymous                                                                                                                                                                                                                                                                                                                                                                                                     |
|              | /taxa=VC51, V212-1, MJ1485, MJ1236, A346_2,<br>A346_1, B33, 1627, 1346, 1362, 4670,<br>4672, 4121, 4110, 4111, 4113                                                                                                                                                                                                                                                                                                           |
| SNP Position | 1567296                                                                                                                                                                                                                                                                                                                                                                                                                       |
|              | /strand=reverse                                                                                                                                                                                                                                                                                                                                                                                                               |
|              | /SNP="G->T"                                                                                                                                                                                                                                                                                                                                                                                                                   |
|              | /codon_type=Nonsynonymous                                                                                                                                                                                                                                                                                                                                                                                                     |
|              | /taxa=2010EL_1798, 2010EL_1786, 2010EL_1792, IDHO1726,<br>4519, 4538                                                                                                                                                                                                                                                                                                                                                          |
| SNP Position | 1570141                                                                                                                                                                                                                                                                                                                                                                                                                       |
|              | /strand=reverse                                                                                                                                                                                                                                                                                                                                                                                                               |
|              | /SNP="G->A"                                                                                                                                                                                                                                                                                                                                                                                                                   |
|              | /codon_type=Nonsynonymous                                                                                                                                                                                                                                                                                                                                                                                                     |
|              | /taxa=A4                                                                                                                                                                                                                                                                                                                                                                                                                      |
| SNP Position | 1570602                                                                                                                                                                                                                                                                                                                                                                                                                       |
|              | /strand=reverse                                                                                                                                                                                                                                                                                                                                                                                                               |
|              | /SNP="T->C"                                                                                                                                                                                                                                                                                                                                                                                                                   |
|              | /codon_type=Synonymous                                                                                                                                                                                                                                                                                                                                                                                                        |
|              | /taxa=A383                                                                                                                                                                                                                                                                                                                                                                                                                    |
| SNP Position | 1571429                                                                                                                                                                                                                                                                                                                                                                                                                       |
|              | /strand=reverse                                                                                                                                                                                                                                                                                                                                                                                                               |
|              | /SNP="C->A"                                                                                                                                                                                                                                                                                                                                                                                                                   |
|              | /codon_type=Nonsynonymous                                                                                                                                                                                                                                                                                                                                                                                                     |

|              |                                                   |
|--------------|---------------------------------------------------|
|              | /taxa=B33, 1627, 1346, 1362                       |
| SNP Position | 1571581                                           |
|              | /strand=reverse                                   |
|              | /SNP="T->C"                                       |
|              | /codon_type=Synonymous                            |
|              | /taxa=A186, A200, A193                            |
| SNP Position | 1571665                                           |
|              | /strand=reverse                                   |
|              | /SNP="C->T"                                       |
|              | /homoplasy=convergence with branch leading to A4  |
|              | /codon_type=Synonymous                            |
|              | /taxa=A5, A31, A27, A185, A184,                   |
|              | A32, A177, A29, A180, A232,                       |
|              | A231, A201, A186, A200, A193,                     |
|              | A390                                              |
| SNP Position | 1571665                                           |
|              | /strand=reverse                                   |
|              | /SNP="C->T"                                       |
|              | /homoplasy=convergence with branch leading to 146 |
|              | /codon_type=Synonymous                            |
|              | /taxa=A4                                          |
| SNP Position | 1571677                                           |
|              | /strand=reverse                                   |
|              | /SNP="A->G"                                       |
|              | /homoplasy=convergence with branch leading to A4  |
|              | /codon_type=Synonymous                            |
|              | /taxa=A5, A31, A27, A185, A184,                   |
|              | A32, A177, A29, A180, A232,                       |
|              | A231, A201, A186, A200, A193,                     |
|              | A390                                              |
| SNP Position | 1571677                                           |
|              | /strand=reverse                                   |
|              | /SNP="A->G"                                       |
|              | /homoplasy=convergence with branch leading to 146 |
|              | /codon_type=Synonymous                            |
|              | /taxa=A4                                          |
| SNP Position | 1571683                                           |
|              | /strand=reverse                                   |
|              | /SNP="T->A"                                       |
|              | /codon_type=Synonymous                            |
|              | /taxa=A5, A31, A27, A185, A184,                   |
|              | A32, A177, A29, A180, A232,                       |
|              | A231, A201, A186, A200, A193,                     |
|              | A390                                              |
| SNP Position | 1571888                                           |
|              | /SNP="C->A"                                       |
|              | /codon_type=Intergenic                            |
|              | /taxa=MG116025, MG116226, 4660, 4675, 4663,       |
|              | 4662, A487_1, A487_2, CIRS101, 4679, MBN17,       |
|              | 2010EL_1798, 2010EL_1786, 2010EL_1792, IDHO1726,  |
|              | 4519, 4538, 4661, A488_2, A488_1,                 |
|              | PRL64, MBRN14, 4122, 4488, 4600,                  |
|              | 4585, 4536, 4623, 4605, 4593,                     |

|              |                                                  |
|--------------|--------------------------------------------------|
|              | 4552, 4551, 4642, 4656, 4646,                    |
|              | 4339, 4322, 4784, 6210, 6215,                    |
|              | 6214, 6212, 6196, 6191, 6195,                    |
|              | 6193, 6194, 6201, 6197, 6180,                    |
|              | A482, A483, A481, 7682, 7684,                    |
|              | 7687, 7685, 7686, V5                             |
| SNP Position | 1571897                                          |
|              | /SNP="G->A"                                      |
|              | /codon_type=Intergenic                           |
|              | /taxa=MG116025, MG116226, 4660, 4675, 4663,      |
|              | 4662, A487_1, A487_2, CIRS101, 4679, MBN17,      |
|              | 2010EL_1798, 2010EL_1786, 2010EL_1792, IDHO1726, |
|              | 4519, 4538, 4661, A488_2, A488_1,                |
|              | PRL64, MBRN14, 4122, 4488, 4600,                 |
|              | 4585, 4536, 4623, 4605, 4593,                    |
|              | 4552, 4551, 4642, 4656, 4646,                    |
|              | 4339, 4322, 4784, 6210, 6215,                    |
|              | 6214, 6212, 6196, 6191, 6195,                    |
|              | 6193, 6194, 6201, 6197, 6180,                    |
|              | A482, A483, A481, 7682, 7684,                    |
|              | 7687, 7685, 7686, V5                             |
| SNP Position | 1571903                                          |
|              | /SNP="A->G"                                      |
|              | /codon_type=Intergenic                           |
|              | /taxa=MG116025, MG116226, 4660, 4675, 4663,      |
|              | 4662, A487_1, A487_2, CIRS101, 4679, MBN17,      |
|              | 2010EL_1798, 2010EL_1786, 2010EL_1792, IDHO1726, |
|              | 4519, 4538, 4661, A488_2, A488_1,                |
|              | PRL64, MBRN14, 4122, 4488, 4600,                 |
|              | 4585, 4536, 4623, 4605, 4593,                    |
|              | 4552, 4551, 4642, 4656, 4646,                    |
|              | 4339, 4322, 4784, 6210, 6215,                    |
|              | 6214, 6212, 6196, 6191, 6195,                    |
|              | 6193, 6194, 6201, 6197, 6180,                    |
|              | A482, A483, A481, 7682, 7684,                    |
|              | 7687, 7685, 7686, V5                             |
| SNP Position | 1574331                                          |
|              | /strand=reverse                                  |
|              | /SNP="C->A"                                      |
|              | /codon_type=Nonsynonymous                        |
|              | /taxa=A482, A483, A481, 7682, 7684,              |
|              | 7687, 7685, 7686                                 |
| SNP Position | 1587244                                          |
|              | /SNP="T->G"                                      |
|              | /codon_type=Nonsynonymous                        |
|              | /taxa=4121, 4110, 4111, 4113                     |
| SNP Position | 1587464                                          |
|              | /SNP="C->T"                                      |
|              | /codon_type=Nonsynonymous                        |
|              | /taxa=MG116025, MG116226, 4660, 4675, 4663,      |
|              | 4662, A487_1, A487_2, CIRS101, 4679, MBN17,      |
|              | 2010EL_1798, 2010EL_1786, 2010EL_1792, IDHO1726, |
|              | 4519, 4538, 4661, A488_2, A488_1,                |

|              |                                           |
|--------------|-------------------------------------------|
|              | PRL64, MBRN14, 4122, 4488, 4600,          |
|              | 4585, 4536, 4623, 4605, 4593,             |
|              | 4552, 4551, 4642, 4656, 4646,             |
|              | 4339, 4322, 4784, 6210, 6215,             |
|              | 6214, 6212, 6196, 6191, 6195,             |
|              | 6193, 6194, 6201, 6197, 6180,             |
|              | A482, A483, A481, 7682, 7684,             |
|              | 7687, 7685, 7686, V5, V109,               |
|              | A130, A131, VC51, V212-1, MJ1485, MJ1236, |
|              | A346_2, A346_1, B33, 1627, 1346, 1362,    |
|              | 4670, 4672, 4121, 4110, 4111,             |
|              | 4113, A109, A383, A330, MO10, PRL5,       |
|              | A316, A245, A241, A10, GP140, RC9,        |
|              | GP143, GP152, A397, A22, GP60, N16961,    |
|              | A19, A5, A31, A27, A185,                  |
|              | A184, A32, A177, A29, A180,               |
|              | A232, A231, A201, A186, A200,             |
|              | A193, A390, GP145, GP160, GP106,          |
|              | A152, A155, A154, A4, PRL18               |
| SNP Position | 1589136                                   |
|              | /strand=reverse                           |
|              | /SNP="G->A"                               |
|              | /codon_type=Nonsynonymous                 |
|              | /taxa=PRL18                               |
| SNP Position | 1589339                                   |
|              | /SNP="C->T"                               |
|              | /codon_type=Intergenic                    |
|              | /taxa=4519                                |
| SNP Position | 1589376                                   |
|              | /SNP="C->T"                               |
|              | /codon_type=Intergenic                    |
|              | /taxa=A22                                 |
| SNP Position | 1591462                                   |
|              | /strand=reverse                           |
|              | /SNP="G->A"                               |
|              | /codon_type=Synonymous                    |
|              | /taxa=A4                                  |
| SNP Position | 1591745                                   |
|              | /strand=reverse                           |
|              | /SNP="C->T"                               |
|              | /codon_type=Nonsynonymous                 |
|              | /taxa=4121, 4110, 4111, 4113              |
| SNP Position | 1591828                                   |
|              | /strand=reverse                           |
|              | /SNP="G->A"                               |
|              | /codon_type=Synonymous                    |
|              | /taxa=N16961, A19                         |
| SNP Position | 1600425                                   |
|              | /strand=reverse                           |
|              | /SNP="C->T"                               |
|              | /codon_type=Synonymous                    |
|              | /taxa=A130, A131                          |
| SNP Position | 1601123                                   |

|              |                                        |
|--------------|----------------------------------------|
|              | /strand=reverse                        |
|              | /SNP="A->G"                            |
|              | /codon_type=Nonsynonymous              |
|              | /taxa=4111                             |
| SNP Position | 1603934                                |
|              | /strand=reverse                        |
|              | /SNP="C->T"                            |
|              | /codon_type=Synonymous                 |
|              | /taxa=A4                               |
| SNP Position | 1620757                                |
|              | /SNP="T->G"                            |
|              | /codon_type=Nonsynonymous              |
|              | /taxa=MJ1485                           |
| SNP Position | 1621159                                |
|              | /SNP="T->C"                            |
|              | /codon_type=Nonsynonymous              |
|              | /taxa=A482, A483, A481, 7682, 7684,    |
|              | 7687, 7685, 7686                       |
| SNP Position | 1622597                                |
|              | /strand=reverse                        |
|              | /SNP="G->A"                            |
|              | /codon_type=Nonsynonymous              |
|              | /taxa=PRL64, MBRN14, 4122, 4488, 4600, |
|              | 4585, 4536, 4623, 4605, 4593,          |
|              | 4552, 4551, 4642, 4656, 4646,          |
|              | 4339, 4322                             |
| SNP Position | 1622828                                |
|              | /SNP="G->A"                            |
|              | /codon_type=Intergenic                 |
|              | /taxa=A397                             |
| SNP Position | 1624893                                |
|              | /strand=reverse                        |
|              | /SNP="G->A"                            |
|              | /codon_type=Synonymous                 |
|              | /taxa=RC9                              |
| SNP Position | 1625689                                |
|              | /SNP="C->T"                            |
|              | /codon_type=Intergenic                 |
|              | /taxa=A4                               |
| SNP Position | 1630002                                |
|              | /strand=reverse                        |
|              | /SNP="G->T"                            |
|              | /codon_type=Nonsynonymous              |
|              | /taxa=A397, A22                        |
| SNP Position | 1630403                                |
|              | /strand=reverse                        |
|              | /SNP="T->A"                            |
|              | /codon_type=Nonsynonymous              |
|              | /taxa=PRL5                             |
| SNP Position | 1641070                                |
|              | /SNP="G->A"                            |
|              | /codon_type=Nonsynonymous              |
|              | /taxa=4660, 4675, 4663, 4662, A487_1,  |

|              |                                                 |
|--------------|-------------------------------------------------|
|              | A487_2, CIRS101, 4679, MBN17, 2010EL_1798,      |
|              | 2010EL_1786, 2010EL_1792, IDHO1726, 4519, 4538, |
|              | 4661, A488_2, A488_1, PRL64, MBRN14,            |
|              | 4122, 4488, 4600, 4585, 4536,                   |
|              | 4623, 4605, 4593, 4552, 4551,                   |
|              | 4642, 4656, 4646, 4339, 4322,                   |
|              | 4784, 6210, 6215, 6214, 6212,                   |
|              | 6196, 6191, 6195, 6193, 6194,                   |
|              | 6201, 6197, 6180, A482, A483,                   |
|              | A481, 7682, 7684, 7687, 7685,                   |
|              | 7686                                            |
| SNP Position | 1641564                                         |
|              | /SNP="A->C"                                     |
|              | /codon_type=Nonsynonymous                       |
|              | /taxa=V212-1                                    |
| SNP Position | 1643519                                         |
|              | /strand=reverse                                 |
|              | /SNP="C->T"                                     |
|              | /codon_type=Synonymous                          |
|              | /taxa=4670                                      |
| SNP Position | 1644903                                         |
|              | /strand=reverse                                 |
|              | /SNP="T->G"                                     |
|              | /codon_type=Nonsynonymous                       |
|              | /taxa=4121, 4110, 4111, 4113                    |
| SNP Position | 1659285                                         |
|              | /strand=reverse                                 |
|              | /SNP="G->T"                                     |
|              | /codon_type=Nonsynonymous                       |
|              | /taxa=A22                                       |
| SNP Position | 1663007                                         |
|              | /SNP="G->A"                                     |
|              | /codon_type=Nonsynonymous                       |
|              | /taxa=A4                                        |
| SNP Position | 1663951                                         |
|              | /SNP="C->T"                                     |
|              | /codon_type=Synonymous                          |
|              | /taxa=6210, 6215, 6214, 6212                    |
| SNP Position | 1667298                                         |
|              | /strand=reverse                                 |
|              | /SNP="T->C"                                     |
|              | /codon_type=Synonymous                          |
|              | /taxa=A4                                        |
| SNP Position | 1670732                                         |
|              | /SNP="T->C"                                     |
|              | /codon_type=Intergenic                          |
|              | /taxa=VC51                                      |
| SNP Position | 1673173                                         |
|              | /SNP="A->G"                                     |
|              | /codon_type=Nonsynonymous                       |
|              | /taxa=A241                                      |
| SNP Position | 1680694                                         |
|              | /SNP="C->T"                                     |

|              |                                                  |
|--------------|--------------------------------------------------|
|              | /codon_type=Synonymous                           |
|              | /taxa=A4                                         |
| SNP Position | 1682941                                          |
|              | /strand=reverse                                  |
|              | /SNP="C->T"                                      |
|              | /codon_type=Nonsynonymous                        |
|              | /taxa=CIRS101, 4679, MBN17, 2010EL_1798,         |
|              | 2010EL_1786, 2010EL_1792, IDHO1726, 4519, 4538   |
| SNP Position | 1683280                                          |
|              | /strand=reverse                                  |
|              | /SNP="C->T"                                      |
|              | /codon_type=Nonsynonymous                        |
|              | /taxa=4536                                       |
| SNP Position | 1687001                                          |
|              | /strand=reverse                                  |
|              | /SNP="T->C"                                      |
|              | /codon_type=Nonsynonymous                        |
|              | /taxa=PRL18                                      |
| SNP Position | 1687002                                          |
|              | /strand=reverse                                  |
|              | /SNP="A->T"                                      |
|              | /codon_type=Synonymous                           |
|              | /taxa=MG116025, MG116226, 4660, 4675, 4663,      |
|              | 4662, A487_1, A487_2, CIRS101, 4679, MBN17,      |
|              | 2010EL_1798, 2010EL_1786, 2010EL_1792, IDHO1726, |
|              | 4519, 4538, 4661, A488_2, A488_1,                |
|              | PRL64, MBRN14, 4122, 4488, 4600,                 |
|              | 4585, 4536, 4623, 4605, 4593,                    |
|              | 4552, 4551, 4642, 4656, 4646,                    |
|              | 4339, 4322, 4784, 6210, 6215,                    |
|              | 6214, 6212, 6196, 6191, 6195,                    |
|              | 6193, 6194, 6201, 6197, 6180,                    |
|              | A482, A483, A481, 7682, 7684,                    |
|              | 7687, 7685, 7686, V5, V109,                      |
|              | A130, A131, VC51, V212-1, MJ1485, MJ1236,        |
|              | A346_2, A346_1, B33, 1627, 1346, 1362,           |
|              | 4670, 4672, 4121, 4110, 4111,                    |
|              | 4113, A109, A383, A330, MO10                     |
| SNP Position | 1688947                                          |
|              | /strand=reverse                                  |
|              | /SNP="A->C"                                      |
|              | /codon_type=Synonymous                           |
|              | /taxa=A383, A330, MO10                           |
| SNP Position | 1691134                                          |
|              | /strand=reverse                                  |
|              | /SNP="T->C"                                      |
|              | /codon_type=Synonymous                           |
|              | /taxa=A397, A22                                  |
| SNP Position | 1692344                                          |
|              | /SNP="T->C"                                      |
|              | /codon_type=Nonsynonymous                        |
|              | /taxa=M66, A6                                    |
| SNP Position | 1693060                                          |

|              |                                                    |
|--------------|----------------------------------------------------|
|              | /SNP="G->A"                                        |
|              | /codon_type=Nonsynonymous                          |
|              | /taxa=4122, 4488, 4600, 4585, 4536,                |
|              | 4623, 4605, 4593, 4552, 4551                       |
| SNP Position | 1697067                                            |
|              | /strand=reverse                                    |
|              | /SNP="G->A"                                        |
|              | /codon_type=Synonymous                             |
|              | /taxa=PRL18                                        |
| SNP Position | 1699375                                            |
|              | /strand=reverse                                    |
|              | /SNP="C->G"                                        |
|              | /codon_type=Nonsynonymous                          |
|              | /taxa=GP143                                        |
| SNP Position | 1701464                                            |
|              | /SNP="T->C"                                        |
|              | /codon_type=Synonymous                             |
|              | /taxa=A152, A155, A154                             |
| SNP Position | 1704468                                            |
|              | /SNP="T->C"                                        |
|              | /codon_type=Nonsynonymous                          |
|              | /taxa=A4                                           |
| SNP Position | 1709267                                            |
|              | /strand=reverse                                    |
|              | /SNP="C->T"                                        |
|              | /codon_type=Nonsynonymous                          |
|              | /taxa=4784, 6210, 6215, 6214, 6212,                |
|              | 6196, 6191, 6195, 6193, 6194,                      |
|              | 6201, 6197, 6180, A482, A483,                      |
|              | A481, 7682, 7684, 7687, 7685,                      |
|              | 7686                                               |
| SNP Position | 1709282                                            |
|              | /strand=reverse                                    |
|              | /SNP="G->A"                                        |
|              | /codon_type=Nonsynonymous                          |
|              | /taxa=A316                                         |
| SNP Position | 1709451                                            |
|              | /SNP="C->A"                                        |
|              | /codon_type=Intergenic                             |
|              | /taxa=4552                                         |
| SNP Position | 1712052                                            |
|              | /SNP="T->C"                                        |
|              | /codon_type=Nonsynonymous                          |
|              | /taxa=A4                                           |
| SNP Position | 1712460                                            |
|              | /SNP="G->A"                                        |
|              | /codon_type=Intergenic                             |
|              | /taxa=A4                                           |
| SNP Position | 1712749                                            |
|              | /SNP="G->A"                                        |
|              | /homoplasy=convergence with branch leading to 4670 |
|              | /codon_type=Intergenic                             |
|              | /taxa=4488                                         |



|              |                                                    |
|--------------|----------------------------------------------------|
| SNP Position | 1712749                                            |
|              | /SNP="G->A"                                        |
|              | /homoplasy=convergence with branch leading to 4488 |
|              | /codon_type=Intergenic                             |
|              | /taxa=4670                                         |
| SNP Position | 1715888                                            |
|              | /strand=reverse                                    |
|              | /SNP="T->C"                                        |
|              | /codon_type=Nonsynonymous                          |
|              | /taxa=A4                                           |
| SNP Position | 1717465                                            |
|              | /strand=reverse                                    |
|              | /SNP="T->C"                                        |
|              | /codon_type=Nonsynonymous                          |
|              | /taxa=A4                                           |
| SNP Position | 1720452                                            |
|              | /SNP="C->T"                                        |
|              | /codon_type=Nonsynonymous                          |
|              | /taxa=A245, A241                                   |
| SNP Position | 1722839                                            |
|              | /SNP="T->C"                                        |
|              | /codon_type=Nonsynonymous                          |
|              | /taxa=A4                                           |
| SNP Position | 1728150                                            |
|              | /strand=reverse                                    |
|              | /SNP="G->T"                                        |
|              | /codon_type=Nonsynonymous                          |
|              | /taxa=MG116025, MG116226, 4660, 4675, 4663,        |
|              | 4662, A487_1, A487_2, CIRS101, 4679, MBN17,        |
|              | 2010EL_1798, 2010EL_1786, 2010EL_1792, IDHO1726,   |
|              | 4519, 4538, 4661, A488_2, A488_1,                  |
|              | PRL64, MBRN14, 4122, 4488, 4600,                   |
|              | 4585, 4536, 4623, 4605, 4593,                      |
|              | 4552, 4551, 4642, 4656, 4646,                      |
|              | 4339, 4322, 4784, 6210, 6215,                      |
|              | 6214, 6212, 6196, 6191, 6195,                      |
|              | 6193, 6194, 6201, 6197, 6180,                      |
|              | A482, A483, A481, 7682, 7684,                      |
|              | 7687, 7685, 7686, V5, V109,                        |
|              | A130, A131, VC51, V212-1, MJ1485, MJ1236,          |
|              | A346_2, A346_1, B33, 1627, 1346, 1362,             |
|              | 4670, 4672, 4121, 4110, 4111,                      |
|              | 4113, A109, A383, A330, MO10, PRL5,                |
|              | A316, A245, A241, A10, GP140, RC9,                 |
|              | GP143, GP152, A397, A22, GP60, N16961,             |
|              | A19                                                |
| SNP Position | 1730246                                            |
|              | /strand=reverse                                    |
|              | /SNP="T->G"                                        |
|              | /codon_type=Nonsynonymous                          |
|              | /taxa=4675, 4663, 4662, A487_1, A487_2,            |
|              | CIRS101, 4679, MBN17, 2010EL_1798, 2010EL_1786,    |
|              | 2010EL_1792, IDHO1726, 4519, 4538, 4661,           |

|              |                                                     |
|--------------|-----------------------------------------------------|
|              | A488_2, A488_1, PRL64, MBRN14, 4122,                |
|              | 4488, 4600, 4585, 4536, 4623,                       |
|              | 4605, 4593, 4552, 4551, 4642,                       |
|              | 4656, 4646, 4339, 4322                              |
| SNP Position | 1730490                                             |
|              | /strand=reverse                                     |
|              | /SNP="T->C"                                         |
|              | /codon_type=Nonsynonymous                           |
|              | /taxa=A4                                            |
| SNP Position | 1731781                                             |
|              | /SNP="C->T"                                         |
|              | /codon_type=Nonsynonymous                           |
|              | /taxa=GP152                                         |
| SNP Position | 1733732                                             |
|              | /SNP="G->A"                                         |
|              | /codon_type=Intergenic                              |
|              | /taxa=GP152, A397, A22                              |
| SNP Position | 1736731                                             |
|              | /SNP="C->A"                                         |
|              | /homoplasy=convergence with branch leading to 240,  |
|              | convergence with branch leading to 215              |
|              | /codon_type=Intergenic                              |
|              | /taxa=4585                                          |
| SNP Position | 1736731                                             |
|              | /SNP="C->A"                                         |
|              | /homoplasy=convergence with branch leading to 4585, |
|              | convergence with branch leading to 215              |
|              | /codon_type=Intergenic                              |
|              | /taxa=A130, A131                                    |
| SNP Position | 1736731                                             |
|              | /SNP="C->A"                                         |
|              | /homoplasy=convergence with branch leading to 4585, |
|              | convergence with branch leading to 240              |
|              | /codon_type=Intergenic                              |
|              | /taxa=MJ1485, MJ1236, A346_2, A346_1, B33,          |
|              | 1627, 1346, 1362                                    |
| SNP Position | 1739085                                             |
|              | /SNP="T->G"                                         |
|              | /codon_type=Intergenic                              |
|              | /taxa=A482, A483, A481, 7682, 7684,                 |
|              | 7687, 7685, 7686                                    |
| SNP Position | 1739766                                             |
|              | /SNP="C->T"                                         |
|              | /codon_type=Intergenic                              |
|              | /taxa=CIRS101, 4679, MBN17, 2010EL_1798,            |
|              | 2010EL_1786, 2010EL_1792, IDHO1726, 4519, 4538      |
| SNP Position | 1740887                                             |
|              | /SNP="G->A"                                         |
|              | /codon_type=Intergenic                              |
|              | /taxa=A4                                            |
| SNP Position | 1741227                                             |
|              | /SNP="G->A"                                         |
|              | /codon_type=Intergenic                              |

|              |                              |
|--------------|------------------------------|
|              | /taxa=A152, A155, A154       |
| SNP Position | 1745729                      |
|              | /strand=reverse              |
|              | /SNP="T->C"                  |
|              | /codon_type=Nonsynonymous    |
|              | /taxa=M66, A6                |
| SNP Position | 1748797                      |
|              | /SNP="A->C"                  |
|              | /codon_type=Intergenic       |
|              | /taxa=GP145, GP160, GP106    |
| SNP Position | 1749208                      |
|              | /SNP="G->A"                  |
|              | /codon_type=Intergenic       |
|              | /taxa=A383                   |
| SNP Position | 1750231                      |
|              | /strand=reverse              |
|              | /SNP="G->C"                  |
|              | /codon_type=Nonsynonymous    |
|              | /taxa=PRL18                  |
| SNP Position | 1750632                      |
|              | /strand=reverse              |
|              | /SNP="C->T"                  |
|              | /codon_type=Nonsynonymous    |
|              | /taxa=GP152                  |
| SNP Position | 1750702                      |
|              | /strand=reverse              |
|              | /SNP="T->A"                  |
|              | /codon_type=Synonymous       |
|              | /taxa=4605, 4593, 4552, 4551 |
| SNP Position | 1752912                      |
|              | /strand=reverse              |
|              | /SNP="A->G"                  |
|              | /codon_type=Synonymous       |
|              | /taxa=M66, A6                |
| SNP Position | 1756924                      |
|              | /strand=reverse              |
|              | /SNP="T->G"                  |
|              | /codon_type=Nonsynonymous    |
|              | /taxa=4662                   |
| SNP Position | 1763485                      |
|              | /SNP="C->T"                  |
|              | /codon_type=Nonsynonymous    |
|              | /taxa=A383                   |
| SNP Position | 1767520                      |
|              | /strand=reverse              |
|              | /SNP="G->A"                  |
|              | /codon_type=Synonymous       |
|              | /taxa=A4                     |
| SNP Position | 1772665                      |
|              | /strand=reverse              |
|              | /SNP="T->C"                  |
|              | /codon_type=Nonsynonymous    |
|              | /taxa=A4                     |

|              |                                                    |
|--------------|----------------------------------------------------|
| SNP Position | 1775827                                            |
|              | /strand=reverse                                    |
|              | /SNP="G->A"                                        |
|              | /codon_type=Nonsynonymous                          |
|              | /taxa=MJ1485, MJ1236, A346_2, A346_1, B33,         |
|              | 1627, 1346, 1362                                   |
| SNP Position | 1776827                                            |
|              | /SNP="G->A"                                        |
|              | /codon_type=Intergenic                             |
|              | /taxa=A232, A231                                   |
| SNP Position | 1781911                                            |
|              | /strand=reverse                                    |
|              | /SNP="A->G"                                        |
|              | /codon_type=Synonymous                             |
|              | /taxa=4121, 4110                                   |
| SNP Position | 1782519                                            |
|              | /strand=reverse                                    |
|              | /SNP="G->A"                                        |
|              | /codon_type=Nonsynonymous                          |
|              | /taxa=4675, 4663, 4662, A487_1, A487_2,            |
|              | CIRS101, 4679, MBN17, 2010EL_1798, 2010EL_1786,    |
|              | 2010EL_1792, IDHO1726, 4519, 4538, 4661,           |
|              | A488_2, A488_1                                     |
| SNP Position | 1784614                                            |
|              | /strand=reverse                                    |
|              | /SNP="G->A"                                        |
|              | /codon_type=Nonsynonymous                          |
|              | /taxa=A5, A31, A27, A185, A184,                    |
|              | A32, A177, A29, A180, A232,                        |
|              | A231, A201, A186, A200, A193,                      |
|              | A390, GP145, GP160, GP106, A152,                   |
|              | A155, A154, A4                                     |
| SNP Position | 1786040                                            |
|              | /strand=reverse                                    |
|              | /SNP="C->A"                                        |
|              | /homoplasy=convergence with branch leading to V109 |
|              | /codon_type=Synonymous                             |
|              | /taxa=4660, 4675, 4663, 4662, A487_1,              |
|              | A487_2, CIRS101, 4679, MBN17, 2010EL_1798,         |
|              | 2010EL_1786, 2010EL_1792, IDHO1726, 4519, 4538,    |
|              | 4661, A488_2, A488_1, PRL64, MBRN14,               |
|              | 4122, 4488, 4600, 4585, 4536,                      |
|              | 4623, 4605, 4593, 4552, 4551,                      |
|              | 4642, 4656, 4646, 4339, 4322,                      |
|              | 4784, 6210, 6215, 6214, 6212,                      |
|              | 6196, 6191, 6195, 6193, 6194,                      |
|              | 6201, 6197, 6180, A482, A483,                      |
|              | A481, 7682, 7684, 7687, 7685,                      |
|              | 7686                                               |
| SNP Position | 1786040                                            |
|              | /strand=reverse                                    |
|              | /SNP="C->A"                                        |
|              | /homoplasy=convergence with branch leading to 5    |

|              |                                                                                                                                                                                                                                                                                                                                                                                                                               |
|--------------|-------------------------------------------------------------------------------------------------------------------------------------------------------------------------------------------------------------------------------------------------------------------------------------------------------------------------------------------------------------------------------------------------------------------------------|
|              | /codon_type=Synonymous                                                                                                                                                                                                                                                                                                                                                                                                        |
|              | /taxa=V109                                                                                                                                                                                                                                                                                                                                                                                                                    |
| SNP Position | 1792492                                                                                                                                                                                                                                                                                                                                                                                                                       |
|              | /SNP="C->A"                                                                                                                                                                                                                                                                                                                                                                                                                   |
|              | /codon_type=Intergenic                                                                                                                                                                                                                                                                                                                                                                                                        |
|              | /taxa=GP143                                                                                                                                                                                                                                                                                                                                                                                                                   |
| SNP Position | 1795218                                                                                                                                                                                                                                                                                                                                                                                                                       |
|              | /SNP="A->C"                                                                                                                                                                                                                                                                                                                                                                                                                   |
|              | /codon_type=Nonsynonymous                                                                                                                                                                                                                                                                                                                                                                                                     |
|              | /taxa=6210, 6215, 6214, 6212                                                                                                                                                                                                                                                                                                                                                                                                  |
| SNP Position | 1798880                                                                                                                                                                                                                                                                                                                                                                                                                       |
|              | /SNP="C->T"                                                                                                                                                                                                                                                                                                                                                                                                                   |
|              | /codon_type=Nonsynonymous                                                                                                                                                                                                                                                                                                                                                                                                     |
|              | /taxa=A152, A155, A154                                                                                                                                                                                                                                                                                                                                                                                                        |
| SNP Position | 1808870                                                                                                                                                                                                                                                                                                                                                                                                                       |
|              | /strand=reverse                                                                                                                                                                                                                                                                                                                                                                                                               |
|              | /SNP="G->A"                                                                                                                                                                                                                                                                                                                                                                                                                   |
|              | /codon_type=Synonymous                                                                                                                                                                                                                                                                                                                                                                                                        |
|              | /taxa=4663, 4662, A487_1, A487_2, CIRS101,<br>4679, MBN17, 2010EL_1798, 2010EL_1786, 2010EL_1792,<br>IDHO1726, 4519, 4538                                                                                                                                                                                                                                                                                                     |
| SNP Position | 1808872                                                                                                                                                                                                                                                                                                                                                                                                                       |
|              | /strand=reverse                                                                                                                                                                                                                                                                                                                                                                                                               |
|              | /SNP="C->T"                                                                                                                                                                                                                                                                                                                                                                                                                   |
|              | /codon_type=Nonsynonymous                                                                                                                                                                                                                                                                                                                                                                                                     |
|              | /taxa=A346_2, A346_1                                                                                                                                                                                                                                                                                                                                                                                                          |
| SNP Position | 1809138                                                                                                                                                                                                                                                                                                                                                                                                                       |
|              | /strand=reverse                                                                                                                                                                                                                                                                                                                                                                                                               |
|              | /SNP="A->C"                                                                                                                                                                                                                                                                                                                                                                                                                   |
|              | /codon_type=Nonsynonymous                                                                                                                                                                                                                                                                                                                                                                                                     |
|              | /taxa=4660, 4675, 4663, 4662, A487_1,<br>A487_2, CIRS101, 4679, MBN17, 2010EL_1798,<br>2010EL_1786, 2010EL_1792, IDHO1726, 4519, 4538,<br>4661, A488_2, A488_1, PRL64, MBRN14,<br>4122, 4488, 4600, 4585, 4536,<br>4623, 4605, 4593, 4552, 4551,<br>4642, 4656, 4646, 4339, 4322,<br>4784, 6210, 6215, 6214, 6212,<br>6196, 6191, 6195, 6193, 6194,<br>6201, 6197, 6180, A482, A483,<br>A481, 7682, 7684, 7687, 7685,<br>7686 |
| SNP Position | 1813893                                                                                                                                                                                                                                                                                                                                                                                                                       |
|              | /SNP="C->T"                                                                                                                                                                                                                                                                                                                                                                                                                   |
|              | /codon_type=Synonymous                                                                                                                                                                                                                                                                                                                                                                                                        |
|              | /taxa=A245, A241                                                                                                                                                                                                                                                                                                                                                                                                              |
| SNP Position | 1813939                                                                                                                                                                                                                                                                                                                                                                                                                       |
|              | /SNP="G->C"                                                                                                                                                                                                                                                                                                                                                                                                                   |
|              | /codon_type=Nonsynonymous                                                                                                                                                                                                                                                                                                                                                                                                     |
|              | /taxa=A10                                                                                                                                                                                                                                                                                                                                                                                                                     |
| SNP Position | 1814216                                                                                                                                                                                                                                                                                                                                                                                                                       |
|              | /SNP="G->A"                                                                                                                                                                                                                                                                                                                                                                                                                   |
|              | /codon_type=Nonsynonymous                                                                                                                                                                                                                                                                                                                                                                                                     |

|              |                                                  |
|--------------|--------------------------------------------------|
|              | /taxa=4670                                       |
| SNP Position | 1815882                                          |
|              | /SNP="G->A"                                      |
|              | /codon_type=Nonsynonymous                        |
|              | /taxa=A482, A483, A481, 7682, 7684,              |
|              | 7687, 7685, 7686                                 |
| SNP Position | 1816062                                          |
|              | /SNP="C->T"                                      |
|              | /codon_type=Nonsynonymous                        |
|              | /taxa=PRL18                                      |
| SNP Position | 1820324                                          |
|              | /strand=reverse                                  |
|              | /SNP="C->T"                                      |
|              | /codon_type=Synonymous                           |
|              | /taxa=GP140                                      |
| SNP Position | 1822876                                          |
|              | /strand=reverse                                  |
|              | /SNP="C->T"                                      |
|              | /codon_type=SNOP (non-stop codon to stop condon) |
|              | /taxa=MG116025, MG116226, 4660, 4675, 4663,      |
|              | 4662, A487_1, A487_2, CIRS101, 4679, MBN17,      |
|              | 2010EL_1798, 2010EL_1786, 2010EL_1792, IDHO1726, |
|              | 4519, 4538, 4661, A488_2, A488_1,                |
|              | PRL64, MBRN14, 4122, 4488, 4600,                 |
|              | 4585, 4536, 4623, 4605, 4593,                    |
|              | 4552, 4551, 4642, 4656, 4646,                    |
|              | 4339, 4322, 4784, 6210, 6215,                    |
|              | 6214, 6212, 6196, 6191, 6195,                    |
|              | 6193, 6194, 6201, 6197, 6180,                    |
|              | A482, A483, A481, 7682, 7684,                    |
|              | 7687, 7685, 7686, V5, V109,                      |
|              | A130, A131, VC51, V212-1, MJ1485, MJ1236,        |
|              | A346_2, A346_1, B33, 1627, 1346, 1362,           |
|              | 4670, 4672, 4121, 4110, 4111,                    |
|              | 4113, A109, A383, A330, MO10, PRL5,              |
|              | A316, A245, A241, A10, GP140                     |
| SNP Position | 1824708                                          |
|              | /SNP="G->A"                                      |
|              | /codon_type=Intergenic                           |
|              | /taxa=6196, 6191, 6195, 6193, 6194,              |
|              | 6201, 6197, 6180                                 |
| SNP Position | 1826407                                          |
|              | /strand=reverse                                  |
|              | /SNP="C->T"                                      |
|              | /codon_type=Nonsynonymous                        |
|              | /taxa=A152, A155, A154                           |
| SNP Position | 1827217                                          |
|              | /strand=reverse                                  |
|              | /SNP="G->A"                                      |
|              | /codon_type=Synonymous                           |
|              | /taxa=4675, 4663, 4662, A487_1, A487_2,          |
|              | CIRS101, 4679, MBN17, 2010EL_1798, 2010EL_1786,  |
|              | 2010EL_1792, IDHO1726, 4519, 4538, 4661,         |

|              |                                                  |
|--------------|--------------------------------------------------|
|              | A488_2, A488_1, PRL64, MBRN14, 4122,             |
|              | 4488, 4600, 4585, 4536, 4623,                    |
|              | 4605, 4593, 4552, 4551, 4642,                    |
|              | 4656, 4646, 4339, 4322                           |
| SNP Position | 1830915                                          |
|              | /SNP="C->T"                                      |
|              | /codon_type=Synonymous                           |
|              | /taxa=VC51, V212-1, MJ1485, MJ1236, A346_2,      |
|              | A346_1, B33, 1627, 1346, 1362, 4670,             |
|              | 4672, 4121, 4110, 4111, 4113                     |
| SNP Position | 1831784                                          |
|              | /SNP="C->T"                                      |
|              | /codon_type=Nonsynonymous                        |
|              | /taxa=A397                                       |
| SNP Position | 1833923                                          |
|              | /SNP="C->T"                                      |
|              | /codon_type=Nonsynonymous                        |
|              | /taxa=6210, 6215, 6214, 6212, 6196,              |
|              | 6191, 6195, 6193, 6194, 6201,                    |
|              | 6197, 6180                                       |
| SNP Position | 1838836                                          |
|              | /strand=reverse                                  |
|              | /SNP="G->A"                                      |
|              | /codon_type=Nonsynonymous                        |
|              | /taxa=A383, A330, MO10                           |
| SNP Position | 1841705                                          |
|              | /SNP="G->T"                                      |
|              | /codon_type=Nonsynonymous                        |
|              | /taxa=RC9                                        |
| SNP Position | 1861198                                          |
|              | /SNP="C->T"                                      |
|              | /codon_type=Nonsynonymous                        |
|              | /taxa=MG116025, MG116226, 4660, 4675, 4663,      |
|              | 4662, A487_1, A487_2, CIRS101, 4679, MBN17,      |
|              | 2010EL_1798, 2010EL_1786, 2010EL_1792, IDHO1726, |
|              | 4519, 4538, 4661, A488_2, A488_1,                |
|              | PRL64, MBRN14, 4122, 4488, 4600,                 |
|              | 4585, 4536, 4623, 4605, 4593,                    |
|              | 4552, 4551, 4642, 4656, 4646,                    |
|              | 4339, 4322, 4784, 6210, 6215,                    |
|              | 6214, 6212, 6196, 6191, 6195,                    |
|              | 6193, 6194, 6201, 6197, 6180,                    |
|              | A482, A483, A481, 7682, 7684,                    |
|              | 7687, 7685, 7686, V5, V109,                      |
|              | A130, A131, VC51, V212-1, MJ1485, MJ1236,        |
|              | A346_2, A346_1, B33, 1627, 1346, 1362,           |
|              | 4670, 4672, 4121, 4110, 4111,                    |
|              | 4113, A109, A383, A330, MO10, PRL5,              |
|              | A316, A245, A241, A10, GP140, RC9,               |
|              | GP143, GP152, A397, A22, GP60, N16961,           |
|              | A19, A5, A31, A27, A185,                         |
|              | A184, A32, A177, A29, A180,                      |
|              | A232, A231, A201, A186, A200,                    |

|              |                                                  |
|--------------|--------------------------------------------------|
|              | A193, A390, GP145, GP160, GP106,                 |
|              | A152, A155, A154, A4, PRL18                      |
| SNP Position | 1861243                                          |
|              | /SNP="C->T"                                      |
|              | /codon_type=Nonsynonymous                        |
|              | /taxa=RC9                                        |
| SNP Position | 1863468                                          |
|              | /strand=reverse                                  |
|              | /SNP="T->C"                                      |
|              | /codon_type=Nonsynonymous                        |
|              | /taxa=MG116025                                   |
| SNP Position | 1863607                                          |
|              | /strand=reverse                                  |
|              | /SNP="G->C"                                      |
|              | /codon_type=Synonymous                           |
|              | /taxa=4662                                       |
| SNP Position | 1863664                                          |
|              | /strand=reverse                                  |
|              | /SNP="T->C"                                      |
|              | /codon_type=Synonymous                           |
|              | /taxa=A4                                         |
| SNP Position | 1866245                                          |
|              | /strand=reverse                                  |
|              | /SNP="C->T"                                      |
|              | /codon_type=Nonsynonymous                        |
|              | /taxa=A4                                         |
| SNP Position | 1867392                                          |
|              | /strand=reverse                                  |
|              | /SNP="T->A"                                      |
|              | /codon_type=Nonsynonymous                        |
|              | /taxa=V109                                       |
| SNP Position | 1867983                                          |
|              | /strand=reverse                                  |
|              | /SNP="G->C"                                      |
|              | /codon_type=Nonsynonymous                        |
|              | /taxa=MG116025, MG116226, 4660, 4675, 4663,      |
|              | 4662, A487_1, A487_2, CIRS101, 4679, MBN17,      |
|              | 2010EL_1798, 2010EL_1786, 2010EL_1792, IDHO1726, |
|              | 4519, 4538, 4661, A488_2, A488_1,                |
|              | PRL64, MBRN14, 4122, 4488, 4600,                 |
|              | 4585, 4536, 4623, 4605, 4593,                    |
|              | 4552, 4551, 4642, 4656, 4646,                    |
|              | 4339, 4322, 4784, 6210, 6215,                    |
|              | 6214, 6212, 6196, 6191, 6195,                    |
|              | 6193, 6194, 6201, 6197, 6180,                    |
|              | A482, A483, A481, 7682, 7684,                    |
|              | 7687, 7685, 7686, V5, V109,                      |
|              | A130, A131, VC51, V212-1, MJ1485, MJ1236,        |
|              | A346_2, A346_1, B33, 1627, 1346, 1362,           |
|              | 4670, 4672, 4121, 4110, 4111,                    |
|              | 4113, A109, A383, A330, MO10, PRL5,              |
|              | A316, A245, A241, A10, GP140, RC9,               |
|              | GP143, GP152, A397, A22, GP60, N16961,           |



|              |                                             |
|--------------|---------------------------------------------|
|              | A19, A5, A31, A27, A185,                    |
|              | A184, A32, A177, A29, A180,                 |
|              | A232, A231, A201, A186, A200,               |
|              | A193, A390, GP145, GP160, GP106,            |
|              | A152, A155, A154, A4, PRL18                 |
| SNP Position | 1870799                                     |
|              | /strand=reverse                             |
|              | /SNP="C->T"                                 |
|              | /codon_type=Synonymous                      |
|              | /taxa=A4                                    |
| SNP Position | 1871144                                     |
|              | /strand=reverse                             |
|              | /SNP="C->T"                                 |
|              | /codon_type=Synonymous                      |
|              | /taxa=4661, A488_2, A488_1                  |
| SNP Position | 1871447                                     |
|              | /strand=reverse                             |
|              | /SNP="A->G"                                 |
|              | /codon_type=Synonymous                      |
|              | /taxa=M66, A6                               |
| SNP Position | 1878544                                     |
|              | /strand=reverse                             |
|              | /SNP="T->C"                                 |
|              | /codon_type=Synonymous                      |
|              | /taxa=MJ1485, MJ1236                        |
| SNP Position | 1878696                                     |
|              | /SNP="T->C"                                 |
|              | /codon_type=Intergenic                      |
|              | /taxa=A383                                  |
| SNP Position | 1881503                                     |
|              | /strand=reverse                             |
|              | /SNP="G->A"                                 |
|              | /codon_type=Synonymous                      |
|              | /taxa=4672                                  |
| SNP Position | 1882737                                     |
|              | /SNP="G->A"                                 |
|              | /codon_type=Nonsynonymous                   |
|              | /taxa=2010EL_1798, 2010EL_1786, 2010EL_1792 |
| SNP Position | 1889275                                     |
|              | /SNP="T->A"                                 |
|              | /codon_type=Synonymous                      |
|              | /taxa=A5                                    |
| SNP Position | 1891176                                     |
|              | /SNP="C->T"                                 |
|              | /codon_type=Intergenic                      |
|              | /taxa=A482, A483, A481, 7682, 7684,         |
|              | 7687, 7685, 7686                            |
| SNP Position | 1897713                                     |
|              | /SNP="C->T"                                 |
|              | /codon_type=Intergenic                      |
|              | /taxa=4111                                  |
| SNP Position | 1900069                                     |
|              | /strand=reverse                             |

|              |                                                  |
|--------------|--------------------------------------------------|
|              | /SNP="A->G"                                      |
|              | /codon_type=Synonymous                           |
|              | /taxa=A22                                        |
| SNP Position | 1904272                                          |
|              | /strand=reverse                                  |
|              | /SNP="T->A"                                      |
|              | /codon_type=Nonsynonymous                        |
|              | /taxa=4322                                       |
| SNP Position | 1904734                                          |
|              | /strand=reverse                                  |
|              | /SNP="G->A"                                      |
|              | /codon_type=Nonsynonymous                        |
|              | /taxa=4784, 6210, 6215, 6214, 6212,              |
|              | 6196, 6191, 6195, 6193, 6194,                    |
|              | 6201, 6197, 6180, A482, A483,                    |
|              | A481, 7682, 7684, 7687, 7685,                    |
|              | 7686                                             |
| SNP Position | 1904799                                          |
|              | /strand=reverse                                  |
|              | /SNP="T->C"                                      |
|              | /codon_type=Synonymous                           |
|              | /taxa=4784, 6210, 6215, 6214, 6212,              |
|              | 6196, 6191, 6195, 6193, 6194,                    |
|              | 6201, 6197, 6180, A482, A483,                    |
|              | A481, 7682, 7684, 7687, 7685,                    |
|              | 7686                                             |
| SNP Position | 1905690                                          |
|              | /strand=reverse                                  |
|              | /SNP="C->A"                                      |
|              | /codon_type=Nonsynonymous                        |
|              | /taxa=4675, 4663, 4662, A487_1, A487_2,          |
|              | CIRS101, 4679, MBN17, 2010EL_1798, 2010EL_1786,  |
|              | 2010EL_1792, IDHO1726, 4519, 4538, 4661,         |
|              | A488_2, A488_1                                   |
| SNP Position | 1906059                                          |
|              | /strand=reverse                                  |
|              | /SNP="G->A"                                      |
|              | /codon_type=Nonsynonymous                        |
|              | /taxa=A482, A483, A481, 7682, 7684,              |
|              | 7687, 7685, 7686                                 |
| SNP Position | 1915590                                          |
|              | /strand=reverse                                  |
|              | /SNP="T->A"                                      |
|              | /codon_type=SNOP (non-stop codon to stop condon) |
|              | /taxa=A152, A155, A154                           |
| SNP Position | 1921705                                          |
|              | /strand=reverse                                  |
|              | /SNP="A->G"                                      |
|              | /codon_type=Nonsynonymous                        |
|              | /taxa=A5, A31, A27, A185, A184,                  |
|              | A32, A177, A29, A180, A232,                      |
|              | A231, A201, A186, A200, A193,                    |
|              | A390                                             |

|              |                                                  |
|--------------|--------------------------------------------------|
| SNP Position | 1925211                                          |
|              | /SNP="C->A"                                      |
|              | /codon_type=Intergenic                           |
|              | /taxa=4536                                       |
| SNP Position | 1933622                                          |
|              | /SNP="A->G"                                      |
|              | /codon_type=Nonsynonymous                        |
|              | /taxa=GP145, GP160, GP106                        |
| SNP Position | 1945037                                          |
|              | /strand=reverse                                  |
|              | /SNP="G->A"                                      |
|              | /codon_type=Nonsynonymous                        |
|              | /taxa=GP140                                      |
| SNP Position | 1948735                                          |
|              | /SNP="T->C"                                      |
|              | /codon_type=Intergenic                           |
|              | /taxa=A4                                         |
| SNP Position | 1950263                                          |
|              | /SNP="C->A"                                      |
|              | /codon_type=SNOP (non-stop codon to stop condon) |
|              | /taxa=6210, 6215, 6214, 6212, 6196,              |
|              | 6191, 6195, 6193, 6194, 6201,                    |
|              | 6197, 6180                                       |
| SNP Position | 1952001                                          |
|              | /SNP="C->T"                                      |
|              | /codon_type=Synonymous                           |
|              | /taxa=A316                                       |
| SNP Position | 1954489                                          |
|              | /strand=reverse                                  |
|              | /SNP="C->T"                                      |
|              | /codon_type=Nonsynonymous                        |
|              | /taxa=IDHO1726                                   |
| SNP Position | 1954973                                          |
|              | /SNP="G->A"                                      |
|              | /codon_type=Nonsynonymous                        |
|              | /taxa=A232, A231, A201, A186, A200,              |
|              | A193, A390                                       |
| SNP Position | 1957858                                          |
|              | /strand=reverse                                  |
|              | /SNP="T->A"                                      |
|              | /codon_type=Nonsynonymous                        |
|              | /taxa=MJ1485, MJ1236                             |
| SNP Position | 1958051                                          |
|              | /strand=reverse                                  |
|              | /SNP="C->T"                                      |
|              | /codon_type=Synonymous                           |
|              | /taxa=A5, A31, A27, A185, A184,                  |
|              | A32, A177, A29, A180, A232,                      |
|              | A231, A201, A186, A200, A193,                    |
|              | A390, GP145, GP160, GP106, A152,                 |
|              | A155, A154, A4                                   |
| SNP Position | 1958780                                          |
|              | /strand=reverse                                  |

|              |                                             |
|--------------|---------------------------------------------|
|              | /SNP="G->A"                                 |
|              | /codon_type=Synonymous                      |
|              | /taxa=RC9                                   |
| SNP Position | 1961296                                     |
|              | /SNP="C->T"                                 |
|              | /codon_type=Synonymous                      |
|              | /taxa=MBRN14, 4122, 4488, 4600, 4585,       |
|              | 4536, 4623, 4605, 4593, 4552,               |
|              | 4551, 4642, 4656, 4646, 4339, 4322          |
| SNP Position | 1961933                                     |
|              | /SNP="C->T"                                 |
|              | /codon_type=Nonsynonymous                   |
|              | /taxa=PRL64                                 |
| SNP Position | 1962661                                     |
|              | /SNP="G->A"                                 |
|              | /codon_type=Nonsynonymous                   |
|              | /taxa=A4                                    |
| SNP Position | 1978660                                     |
|              | /strand=reverse                             |
|              | /SNP="A->C"                                 |
|              | /codon_type=Nonsynonymous                   |
|              | /taxa=A383                                  |
| SNP Position | 1981947                                     |
|              | /strand=reverse                             |
|              | /SNP="G->A"                                 |
|              | /codon_type=Synonymous                      |
|              | /taxa=2010EL_1798, 2010EL_1786, 2010EL_1792 |
| SNP Position | 1984609                                     |
|              | /SNP="A->G"                                 |
|              | /codon_type=Intergenic                      |
|              | /taxa=1627                                  |
| SNP Position | 1989285                                     |
|              | /SNP="G->A"                                 |
|              | /codon_type=Nonsynonymous                   |
|              | /taxa=A5, A31, A27, A185, A184,             |
|              | A32, A177, A29, A180, A232,                 |
|              | A231, A201, A186, A200, A193,               |
|              | A390                                        |
| SNP Position | 1992805                                     |
|              | /strand=reverse                             |
|              | /SNP="G->T"                                 |
|              | /codon_type=Nonsynonymous                   |
|              | /taxa=4322                                  |
| SNP Position | 1995214                                     |
|              | /SNP="G->A"                                 |
|              | /codon_type=Synonymous                      |
|              | /taxa=V5                                    |
| SNP Position | 2004766                                     |
|              | /SNP="C->T"                                 |
|              | /codon_type=Intergenic                      |
|              | /taxa=A245, A241                            |
| SNP Position | 2005878                                     |
|              | /SNP="C->T"                                 |

|              |                                                  |
|--------------|--------------------------------------------------|
|              | /codon_type=Nonsynonymous                        |
|              | /taxa=A383                                       |
| SNP Position | 2005902                                          |
|              | /SNP="T->G"                                      |
|              | /codon_type=Nonsynonymous                        |
|              | /taxa=MG116025, MG116226, 4660, 4675, 4663,      |
|              | 4662, A487_1, A487_2, CIRS101, 4679, MBN17,      |
|              | 2010EL_1798, 2010EL_1786, 2010EL_1792, IDHO1726, |
|              | 4519, 4538, 4661, A488_2, A488_1,                |
|              | PRL64, MBRN14, 4122, 4488, 4600,                 |
|              | 4585, 4536, 4623, 4605, 4593,                    |
|              | 4552, 4551, 4642, 4656, 4646,                    |
|              | 4339, 4322, 4784, 6210, 6215,                    |
|              | 6214, 6212, 6196, 6191, 6195,                    |
|              | 6193, 6194, 6201, 6197, 6180,                    |
|              | A482, A483, A481, 7682, 7684,                    |
|              | 7687, 7685, 7686, V5, V109,                      |
|              | A130, A131, VC51, V212-1, MJ1485, MJ1236,        |
|              | A346_2, A346_1, B33, 1627, 1346, 1362,           |
|              | 4670, 4672, 4121, 4110, 4111,                    |
|              | 4113, A109, A383, A330, MO10                     |
| SNP Position | 2006113                                          |
|              | /SNP="G->A"                                      |
|              | /codon_type=SNOP (non-stop codon to stop condon) |
|              | /taxa=4111                                       |
| SNP Position | 2007499                                          |
|              | /SNP="C->T"                                      |
|              | /codon_type=Nonsynonymous                        |
|              | /taxa=MBN17                                      |
| SNP Position | 2010869                                          |
|              | /strand=reverse                                  |
|              | /SNP="G->A"                                      |
|              | /codon_type=Nonsynonymous                        |
|              | /taxa=RC9, GP143, GP152, A397, A22,              |
|              | GP60                                             |
| SNP Position | 2012227                                          |
|              | /strand=reverse                                  |
|              | /SNP="G->A"                                      |
|              | /codon_type=Nonsynonymous                        |
|              | /taxa=A383                                       |
| SNP Position | 2017029                                          |
|              | /SNP="T->C"                                      |
|              | /codon_type=Intergenic                           |
|              | /taxa=MG116025, MG116226, 4660, 4675, 4663,      |
|              | 4662, A487_1, A487_2, CIRS101, 4679, MBN17,      |
|              | 2010EL_1798, 2010EL_1786, 2010EL_1792, IDHO1726, |
|              | 4519, 4538, 4661, A488_2, A488_1,                |
|              | PRL64, MBRN14, 4122, 4488, 4600,                 |
|              | 4585, 4536, 4623, 4605, 4593,                    |
|              | 4552, 4551, 4642, 4656, 4646,                    |
|              | 4339, 4322, 4784, 6210, 6215,                    |
|              | 6214, 6212, 6196, 6191, 6195,                    |
|              | 6193, 6194, 6201, 6197, 6180,                    |

|              |                                                  |
|--------------|--------------------------------------------------|
|              | A482, A483, A481, 7682, 7684,                    |
|              | 7687, 7685, 7686, V5, V109,                      |
|              | A130, A131, VC51, V212-1, MJ1485, MJ1236,        |
|              | A346_2, A346_1, B33, 1627, 1346, 1362,           |
|              | 4670, 4672, 4121, 4110, 4111,                    |
|              | 4113, A109, A383, A330, MO10, PRL5,              |
|              | A316, A245, A241, A10                            |
| SNP Position | 2017991                                          |
|              | /SNP="C->T"                                      |
|              | /codon_type=Nonsynonymous                        |
|              | /taxa=GP143                                      |
| SNP Position | 2018958                                          |
|              | /SNP="T->C"                                      |
|              | /codon_type=Synonymous                           |
|              | /taxa=A4                                         |
| SNP Position | 2021745                                          |
|              | /strand=reverse                                  |
|              | /SNP="C->A"                                      |
|              | /codon_type=Nonsynonymous                        |
|              | /taxa=MG116025, MG116226, 4660, 4675, 4663,      |
|              | 4662, A487_1, A487_2, CIRS101, 4679, MBN17,      |
|              | 2010EL_1798, 2010EL_1786, 2010EL_1792, IDHO1726, |
|              | 4519, 4538, 4661, A488_2, A488_1,                |
|              | PRL64, MBRN14, 4122, 4488, 4600,                 |
|              | 4585, 4536, 4623, 4605, 4593,                    |
|              | 4552, 4551, 4642, 4656, 4646,                    |
|              | 4339, 4322, 4784, 6210, 6215,                    |
|              | 6214, 6212, 6196, 6191, 6195,                    |
|              | 6193, 6194, 6201, 6197, 6180,                    |
|              | A482, A483, A481, 7682, 7684,                    |
|              | 7687, 7685, 7686, V5, V109,                      |
|              | A130, A131, VC51, V212-1, MJ1485, MJ1236,        |
|              | A346_2, A346_1, B33, 1627, 1346, 1362,           |
|              | 4670, 4672, 4121, 4110, 4111,                    |
|              | 4113, A109, A383, A330, MO10, PRL5,              |
|              | A316, A245, A241, A10                            |
| SNP Position | 2029268                                          |
|              | /strand=reverse                                  |
|              | /SNP="G->A"                                      |
|              | /codon_type=Nonsynonymous                        |
|              | /taxa=4672                                       |
| SNP Position | 2033101                                          |
|              | /SNP="G->A"                                      |
|              | /codon_type=Nonsynonymous                        |
|              | /taxa=4111                                       |
| SNP Position | 2033964                                          |
|              | /SNP="C->T"                                      |
|              | /codon_type=Intergenic                           |
|              | /taxa=A5, A31, A27, A185, A184,                  |
|              | A32, A177, A29, A180, A232,                      |
|              | A231, A201, A186, A200, A193,                    |
|              | A390                                             |
| SNP Position | 2034684                                          |

|              |                                                  |
|--------------|--------------------------------------------------|
|              | /SNP="C->T"                                      |
|              | /codon_type=Synonymous                           |
|              | /taxa=A31, A27, A185, A184, A32,                 |
|              | A177, A29, A180, A232, A231,                     |
|              | A201, A186, A200, A193, A390                     |
| SNP Position | 2038278                                          |
|              | /strand=reverse                                  |
|              | /SNP="C->T"                                      |
|              | /codon_type=Nonsynonymous                        |
|              | /taxa=GP143                                      |
| SNP Position | 2043020                                          |
|              | /strand=reverse                                  |
|              | /SNP="G->A"                                      |
|              | /codon_type=Nonsynonymous                        |
|              | /taxa=VC51                                       |
| SNP Position | 2044594                                          |
|              | /SNP="C->T"                                      |
|              | /codon_type=Synonymous                           |
|              | /taxa=MG116025, MG116226, 4660, 4675, 4663,      |
|              | 4662, A487_1, A487_2, CIRS101, 4679, MBN17,      |
|              | 2010EL_1798, 2010EL_1786, 2010EL_1792, IDHO1726, |
|              | 4519, 4538, 4661, A488_2, A488_1,                |
|              | PRL64, MBRN14, 4122, 4488, 4600,                 |
|              | 4585, 4536, 4623, 4605, 4593,                    |
|              | 4552, 4551, 4642, 4656, 4646,                    |
|              | 4339, 4322, 4784, 6210, 6215,                    |
|              | 6214, 6212, 6196, 6191, 6195,                    |
|              | 6193, 6194, 6201, 6197, 6180,                    |
|              | A482, A483, A481, 7682, 7684,                    |
|              | 7687, 7685, 7686, V5, V109,                      |
|              | A130, A131, VC51, V212-1, MJ1485, MJ1236,        |
|              | A346_2, A346_1, B33, 1627, 1346, 1362,           |
|              | 4670, 4672, 4121, 4110, 4111,                    |
|              | 4113, A109, A383, A330, MO10, PRL5,              |
|              | A316, A245, A241, A10, GP140, RC9,               |
|              | GP143, GP152, A397, A22, GP60, N16961,           |
|              | A19                                              |
| SNP Position | 2045787                                          |
|              | /SNP="G->A"                                      |
|              | /codon_type=Nonsynonymous                        |
|              | /taxa=A4                                         |
| SNP Position | 2046766                                          |
|              | /SNP="A->C"                                      |
|              | /codon_type=Nonsynonymous                        |
|              | /taxa=VC51                                       |
| SNP Position | 2047456                                          |
|              | /SNP="G->A"                                      |
|              | /codon_type=SNOP (non-stop codon to stop condon) |
|              | /taxa=PRL64                                      |
| SNP Position | 2048311                                          |
|              | /strand=reverse                                  |
|              | /SNP="C->T"                                      |
|              | /codon_type=Nonsynonymous                        |

|              |                                              |
|--------------|----------------------------------------------|
|              | /taxa=V109                                   |
| SNP Position | 2054970                                      |
|              | /strand=reverse                              |
|              | /SNP="G->A"                                  |
|              | /codon_type=Synonymous                       |
|              | /taxa=6210, 6215, 6214, 6212                 |
| SNP Position | 2057242                                      |
|              | /strand=reverse                              |
|              | /SNP="G->A"                                  |
|              | /codon_type=Nonsynonymous                    |
|              | /taxa=6210, 6215, 6214, 6212, 6196,          |
|              | 6191, 6195, 6193, 6194, 6201,                |
|              | 6197, 6180                                   |
| SNP Position | 2059765                                      |
|              | /SNP="C->T"                                  |
|              | /codon_type=Nonsynonymous                    |
|              | /taxa=4679, MBN17, 2010EL_1798, 2010EL_1786, |
|              | 2010EL_1792, IDHO1726, 4519, 4538            |
| SNP Position | 2068465                                      |
|              | /strand=reverse                              |
|              | /SNP="G->T"                                  |
|              | /codon_type=Nonsynonymous                    |
|              | /taxa=A130, A131                             |
| SNP Position | 2074526                                      |
|              | /strand=reverse                              |
|              | /SNP="T->C"                                  |
|              | /codon_type=Synonymous                       |
|              | /taxa=RC9                                    |
| SNP Position | 2075894                                      |
|              | /SNP="C->T"                                  |
|              | /codon_type=Nonsynonymous                    |
|              | /taxa=4111                                   |
| SNP Position | 2075922                                      |
|              | /SNP="T->C"                                  |
|              | /codon_type=Nonsynonymous                    |
|              | /taxa=4339                                   |
| SNP Position | 2076292                                      |
|              | /SNP="G->A"                                  |
|              | /codon_type=Nonsynonymous                    |
|              | /taxa=4593                                   |
| SNP Position | 2076603                                      |
|              | /SNP="T->C"                                  |
|              | /codon_type=Nonsynonymous                    |
|              | /taxa=A4                                     |
| SNP Position | 2076664                                      |
|              | /SNP="G->A"                                  |
|              | /codon_type=Nonsynonymous                    |
|              | /taxa=4670                                   |
| SNP Position | 2076674                                      |
|              | /SNP="A->G"                                  |
|              | /codon_type=Nonsynonymous                    |
|              | /taxa=4488                                   |
| SNP Position | 2076702                                      |



|              |                                                                                                                                            |
|--------------|--------------------------------------------------------------------------------------------------------------------------------------------|
|              | /SNP="A->G"                                                                                                                                |
|              | /homoplasy=convergence with branch leading to 4623,<br>convergence with branch leading to 4322, convergence<br>with branch leading to A152 |
|              | /codon_type=Nonsynonymous                                                                                                                  |
|              | /taxa=4538                                                                                                                                 |
| SNP Position | 2076702                                                                                                                                    |
|              | /SNP="A->G"                                                                                                                                |
|              | /homoplasy=convergence with branch leading to 4538,<br>convergence with branch leading to 4322, convergence<br>with branch leading to A152 |
|              | /codon_type=Nonsynonymous                                                                                                                  |
|              | /taxa=4623                                                                                                                                 |
| SNP Position | 2076702                                                                                                                                    |
|              | /SNP="A->G"                                                                                                                                |
|              | /homoplasy=convergence with branch leading to 4538,<br>convergence with branch leading to 4623, convergence<br>with branch leading to A152 |
|              | /codon_type=Nonsynonymous                                                                                                                  |
|              | /taxa=4322                                                                                                                                 |
| SNP Position | 2076702                                                                                                                                    |
|              | /SNP="A->G"                                                                                                                                |
|              | /homoplasy=convergence with branch leading to 4538,<br>convergence with branch leading to 4623, convergence<br>with branch leading to 4322 |
|              | /codon_type=Nonsynonymous                                                                                                                  |
|              | /taxa=A152                                                                                                                                 |
| SNP Position | 2076706                                                                                                                                    |
|              | /SNP="C->G"                                                                                                                                |
|              | /homoplasy=convergence with branch leading to 4623,<br>convergence with branch leading to 4322, convergence<br>with branch leading to A152 |
|              | /codon_type=Nonsynonymous                                                                                                                  |
|              | /taxa=4538                                                                                                                                 |
| SNP Position | 2076706                                                                                                                                    |
|              | /SNP="C->G"                                                                                                                                |
|              | /homoplasy=convergence with branch leading to 4538,<br>convergence with branch leading to 4322, convergence<br>with branch leading to A152 |
|              | /codon_type=Nonsynonymous                                                                                                                  |
|              | /taxa=4623                                                                                                                                 |
| SNP Position | 2076706                                                                                                                                    |
|              | /SNP="C->G"                                                                                                                                |
|              | /homoplasy=convergence with branch leading to 4538,<br>convergence with branch leading to 4623, convergence<br>with branch leading to A152 |
|              | /codon_type=Nonsynonymous                                                                                                                  |
|              | /taxa=4322                                                                                                                                 |
| SNP Position | 2076706                                                                                                                                    |
|              | /SNP="C->G"                                                                                                                                |
|              | /homoplasy=convergence with branch leading to 4538,<br>convergence with branch leading to 4623, convergence<br>with branch leading to 4322 |

|              |                                                    |
|--------------|----------------------------------------------------|
|              | /codon_type=Nonsynonymous                          |
|              | /taxa=A152                                         |
| SNP Position | 2076707                                            |
|              | /SNP="C->T"                                        |
|              | /codon_type=Nonsynonymous                          |
|              | /taxa=4536                                         |
| SNP Position | 2076709                                            |
|              | /SNP="G->T"                                        |
|              | /homoplasy=convergence with branch leading to 4585 |
|              | /codon_type=Synonymous                             |
|              | /taxa=4488                                         |
| SNP Position | 2076709                                            |
|              | /SNP="G->T"                                        |
|              | /homoplasy=convergence with branch leading to 4488 |
|              | /codon_type=Synonymous                             |
|              | /taxa=4585                                         |
| SNP Position | 2076783                                            |
|              | /SNP="G->A"                                        |
|              | /codon_type=Nonsynonymous                          |
|              | /taxa=4552, 4551                                   |
| SNP Position | 2076897                                            |
|              | /SNP="C->G"                                        |
|              | /codon_type=Nonsynonymous                          |
|              | /taxa=4642, 4656, 4646                             |
| SNP Position | 2076927                                            |
|              | /SNP="C->T"                                        |
|              | /codon_type=Nonsynonymous                          |
|              | /taxa=A10                                          |
| SNP Position | 2078459                                            |
|              | /SNP="A->C"                                        |
|              | /codon_type=Nonsynonymous                          |
|              | /taxa=4339                                         |
| SNP Position | 2078496                                            |
|              | /SNP="C->T"                                        |
|              | /codon_type=Synonymous                             |
|              | /taxa=MBRN14, 4122, 4488, 4600, 4585,              |
|              | 4536, 4623, 4605, 4593, 4552,                      |
|              | 4551, 4642, 4656, 4646, 4339, 4322                 |
| SNP Position | 2078502                                            |
|              | /SNP="G->A"                                        |
|              | /codon_type=Synonymous                             |
|              | /taxa=4784                                         |
| SNP Position | 2080965                                            |
|              | /strand=reverse                                    |
|              | /SNP="G->A"                                        |
|              | /codon_type=Nonsynonymous                          |
|              | /taxa=V109                                         |
| SNP Position | 2081651                                            |
|              | /strand=reverse                                    |
|              | /SNP="T->G"                                        |
|              | /codon_type=Nonsynonymous                          |
|              | /taxa=4605                                         |
| SNP Position | 2081972                                            |

|              |                                                                                                                                                                                                                                                                                                                                                                                                                                                                                                                                                     |
|--------------|-----------------------------------------------------------------------------------------------------------------------------------------------------------------------------------------------------------------------------------------------------------------------------------------------------------------------------------------------------------------------------------------------------------------------------------------------------------------------------------------------------------------------------------------------------|
|              | /strand=reverse                                                                                                                                                                                                                                                                                                                                                                                                                                                                                                                                     |
|              | /SNP="C->T"                                                                                                                                                                                                                                                                                                                                                                                                                                                                                                                                         |
|              | /codon_type=Nonsynonymous                                                                                                                                                                                                                                                                                                                                                                                                                                                                                                                           |
|              | /taxa=4322                                                                                                                                                                                                                                                                                                                                                                                                                                                                                                                                          |
| SNP Position | 2085907                                                                                                                                                                                                                                                                                                                                                                                                                                                                                                                                             |
|              | /SNP="C->T"                                                                                                                                                                                                                                                                                                                                                                                                                                                                                                                                         |
|              | /codon_type=Nonsynonymous                                                                                                                                                                                                                                                                                                                                                                                                                                                                                                                           |
|              | /taxa=IDHO1726                                                                                                                                                                                                                                                                                                                                                                                                                                                                                                                                      |
| SNP Position | 2088750                                                                                                                                                                                                                                                                                                                                                                                                                                                                                                                                             |
|              | /SNP="C->T"                                                                                                                                                                                                                                                                                                                                                                                                                                                                                                                                         |
|              | /codon_type=Nonsynonymous                                                                                                                                                                                                                                                                                                                                                                                                                                                                                                                           |
|              | /taxa=A383                                                                                                                                                                                                                                                                                                                                                                                                                                                                                                                                          |
| SNP Position | 2090691                                                                                                                                                                                                                                                                                                                                                                                                                                                                                                                                             |
|              | /SNP="G->A"                                                                                                                                                                                                                                                                                                                                                                                                                                                                                                                                         |
|              | /codon_type=Intergenic                                                                                                                                                                                                                                                                                                                                                                                                                                                                                                                              |
|              | /taxa=A383, A330, MO10                                                                                                                                                                                                                                                                                                                                                                                                                                                                                                                              |
| SNP Position | 2098556                                                                                                                                                                                                                                                                                                                                                                                                                                                                                                                                             |
|              | /SNP="C->A"                                                                                                                                                                                                                                                                                                                                                                                                                                                                                                                                         |
|              | /codon_type=Nonsynonymous                                                                                                                                                                                                                                                                                                                                                                                                                                                                                                                           |
|              | /taxa=2010EL_1798, 2010EL_1786, 2010EL_1792                                                                                                                                                                                                                                                                                                                                                                                                                                                                                                         |
| SNP Position | 2103180                                                                                                                                                                                                                                                                                                                                                                                                                                                                                                                                             |
|              | /strand=reverse                                                                                                                                                                                                                                                                                                                                                                                                                                                                                                                                     |
|              | /SNP="G->T"                                                                                                                                                                                                                                                                                                                                                                                                                                                                                                                                         |
|              | /codon_type=Nonsynonymous                                                                                                                                                                                                                                                                                                                                                                                                                                                                                                                           |
|              | /taxa=A383                                                                                                                                                                                                                                                                                                                                                                                                                                                                                                                                          |
| SNP Position | 2103318                                                                                                                                                                                                                                                                                                                                                                                                                                                                                                                                             |
|              | /strand=reverse                                                                                                                                                                                                                                                                                                                                                                                                                                                                                                                                     |
|              | /SNP="A->T"                                                                                                                                                                                                                                                                                                                                                                                                                                                                                                                                         |
|              | /codon_type=Nonsynonymous                                                                                                                                                                                                                                                                                                                                                                                                                                                                                                                           |
|              | /taxa=V5                                                                                                                                                                                                                                                                                                                                                                                                                                                                                                                                            |
| SNP Position | 2104928                                                                                                                                                                                                                                                                                                                                                                                                                                                                                                                                             |
|              | /strand=reverse                                                                                                                                                                                                                                                                                                                                                                                                                                                                                                                                     |
|              | /SNP="C->T"                                                                                                                                                                                                                                                                                                                                                                                                                                                                                                                                         |
|              | /codon_type=Nonsynonymous                                                                                                                                                                                                                                                                                                                                                                                                                                                                                                                           |
|              | /taxa=A4                                                                                                                                                                                                                                                                                                                                                                                                                                                                                                                                            |
| SNP Position | 2107686                                                                                                                                                                                                                                                                                                                                                                                                                                                                                                                                             |
|              | /strand=reverse                                                                                                                                                                                                                                                                                                                                                                                                                                                                                                                                     |
|              | /SNP="G->A"                                                                                                                                                                                                                                                                                                                                                                                                                                                                                                                                         |
|              | /codon_type=Synonymous                                                                                                                                                                                                                                                                                                                                                                                                                                                                                                                              |
|              | /taxa=MG116025, MG116226, 4660, 4675, 4663,<br>4662, A487_1, A487_2, CIRS101, 4679, MBN17,<br>2010EL_1798, 2010EL_1786, 2010EL_1792, IDHO1726,<br>4519, 4538, 4661, A488_2, A488_1,<br>PRL64, MBRN14, 4122, 4488, 4600,<br>4585, 4536, 4623, 4605, 4593,<br>4552, 4551, 4642, 4656, 4646,<br>4339, 4322, 4784, 6210, 6215,<br>6214, 6212, 6196, 6191, 6195,<br>6193, 6194, 6201, 6197, 6180,<br>A482, A483, A481, 7682, 7684,<br>7687, 7685, 7686, V5, V109,<br>A130, A131, VC51, V212-1, MJ1485, MJ1236,<br>A346_2, A346_1, B33, 1627, 1346, 1362, |

|              |                                                  |
|--------------|--------------------------------------------------|
|              | 4670, 4672, 4121, 4110, 4111,                    |
|              | 4113, A109, A383, A330, MO10                     |
| SNP Position | 2108785                                          |
|              | /strand=reverse                                  |
|              | /SNP="G->C"                                      |
|              | /codon_type=Nonsynonymous                        |
|              | /taxa=GP140                                      |
| SNP Position | 2118347                                          |
|              | /SNP="G->A"                                      |
|              | /codon_type=Nonsynonymous                        |
|              | /taxa=MG116025, MG116226, 4660, 4675, 4663,      |
|              | 4662, A487_1, A487_2, CIRS101, 4679, MBN17,      |
|              | 2010EL_1798, 2010EL_1786, 2010EL_1792, IDHO1726, |
|              | 4519, 4538, 4661, A488_2, A488_1,                |
|              | PRL64, MBRN14, 4122, 4488, 4600,                 |
|              | 4585, 4536, 4623, 4605, 4593,                    |
|              | 4552, 4551, 4642, 4656, 4646,                    |
|              | 4339, 4322, 4784, 6210, 6215,                    |
|              | 6214, 6212, 6196, 6191, 6195,                    |
|              | 6193, 6194, 6201, 6197, 6180,                    |
|              | A482, A483, A481, 7682, 7684,                    |
|              | 7687, 7685, 7686, V5, V109,                      |
|              | A130, A131, VC51, V212-1, MJ1485, MJ1236,        |
|              | A346_2, A346_1, B33, 1627, 1346, 1362,           |
|              | 4670, 4672, 4121, 4110, 4111,                    |
|              | 4113, A109, A383, A330, MO10, PRL5,              |
|              | A316, A245, A241, A10, GP140, RC9,               |
|              | GP143, GP152, A397, A22, GP60, N16961,           |
|              | A19                                              |
| SNP Position | 2118408                                          |
|              | /SNP="A->T"                                      |
|              | /codon_type=Nonsynonymous                        |
|              | /taxa=4600, 4585, 4536, 4623                     |
| SNP Position | 2118873                                          |
|              | /SNP="A->G"                                      |
|              | /codon_type=Nonsynonymous                        |
|              | /taxa=MG116025                                   |
| SNP Position | 2122620                                          |
|              | /strand=reverse                                  |
|              | /SNP="C->T"                                      |
|              | /codon_type=Nonsynonymous                        |
|              | /taxa=A482, A483, A481, 7682, 7684,              |
|              | 7687, 7685, 7686                                 |
| SNP Position | 2124622                                          |
|              | /strand=reverse                                  |
|              | /SNP="G->A"                                      |
|              | /codon_type=Nonsynonymous                        |
|              | /taxa=6210, 6215, 6214, 6212                     |
| SNP Position | 2130250                                          |
|              | /SNP="G->C"                                      |
|              | /codon_type=Nonsynonymous                        |
|              | /taxa=GP152, A397, A22                           |
| SNP Position | 2130555                                          |

|              |                                            |
|--------------|--------------------------------------------|
|              | /SNP="A->G"                                |
|              | /codon_type=Nonsynonymous                  |
|              | /taxa=A4                                   |
| SNP Position | 2141161                                    |
|              | /strand=reverse                            |
|              | /SNP="C->T"                                |
|              | /codon_type=Synonymous                     |
|              | /taxa=A316                                 |
| SNP Position | 2141561                                    |
|              | /strand=reverse                            |
|              | /SNP="C->T"                                |
|              | /codon_type=Nonsynonymous                  |
|              | /taxa=4672                                 |
| SNP Position | 2146044                                    |
|              | /strand=reverse                            |
|              | /SNP="T->C"                                |
|              | /codon_type=Nonsynonymous                  |
|              | /taxa=A4                                   |
| SNP Position | 2148604                                    |
|              | /SNP="A->G"                                |
|              | /codon_type=Synonymous                     |
|              | /taxa=GP143                                |
| SNP Position | 2152987                                    |
|              | /SNP="T->C"                                |
|              | /codon_type=Nonsynonymous                  |
|              | /taxa=A4                                   |
| SNP Position | 2159532                                    |
|              | /strand=reverse                            |
|              | /SNP="C->A"                                |
|              | /codon_type=Synonymous                     |
|              | /taxa=4784                                 |
| SNP Position | 2160720                                    |
|              | /SNP="T->C"                                |
|              | /codon_type=Intergenic                     |
|              | /taxa=GP140                                |
| SNP Position | 2162679                                    |
|              | /strand=reverse                            |
|              | /SNP="T->C"                                |
|              | /codon_type=Nonsynonymous                  |
|              | /taxa=V109                                 |
| SNP Position | 2163614                                    |
|              | /strand=reverse                            |
|              | /SNP="A->G"                                |
|              | /codon_type=Synonymous                     |
|              | /taxa=A397                                 |
| SNP Position | 2165017                                    |
|              | /SNP="G->A"                                |
|              | /codon_type=Nonsynonymous                  |
|              | /taxa=4551                                 |
| SNP Position | 2168396                                    |
|              | /SNP="G->A"                                |
|              | /codon_type=Intergenic                     |
|              | /taxa=MJ1485, MJ1236, A346_2, A346_1, B33, |

|              |                                                  |
|--------------|--------------------------------------------------|
|              | 1627, 1346, 1362, 4670                           |
| SNP Position | 2180993                                          |
|              | /SNP="C->A"                                      |
|              | /codon_type=Synonymous                           |
|              | /taxa=A5                                         |
| SNP Position | 2184609                                          |
|              | /SNP="T->C"                                      |
|              | /codon_type=Synonymous                           |
|              | /taxa=MG116025, MG116226, 4660, 4675, 4663,      |
|              | 4662, A487_1, A487_2, CIRS101, 4679, MBN17,      |
|              | 2010EL_1798, 2010EL_1786, 2010EL_1792, IDHO1726, |
|              | 4519, 4538, 4661, A488_2, A488_1,                |
|              | PRL64, MBRN14, 4122, 4488, 4600,                 |
|              | 4585, 4536, 4623, 4605, 4593,                    |
|              | 4552, 4551, 4642, 4656, 4646,                    |
|              | 4339, 4322, 4784, 6210, 6215,                    |
|              | 6214, 6212, 6196, 6191, 6195,                    |
|              | 6193, 6194, 6201, 6197, 6180,                    |
|              | A482, A483, A481, 7682, 7684,                    |
|              | 7687, 7685, 7686, V5, V109,                      |
|              | A130, A131, VC51, V212-1, MJ1485, MJ1236,        |
|              | A346_2, A346_1, B33, 1627, 1346, 1362,           |
|              | 4670, 4672, 4121, 4110, 4111, 4113               |
| SNP Position | 2190387                                          |
|              | /SNP="T->C"                                      |
|              | /codon_type=Intergenic                           |
|              | /taxa=A316                                       |
| SNP Position | 2190583                                          |
|              | /SNP="G->A"                                      |
|              | /codon_type=Synonymous                           |
|              | /taxa=A383, A330, MO10                           |
| SNP Position | 2191755                                          |
|              | /strand=reverse                                  |
|              | /SNP="A->G"                                      |
|              | /codon_type=Nonsynonymous                        |
|              | /taxa=IDHO1726                                   |
| SNP Position | 2193024                                          |
|              | /SNP="T->C"                                      |
|              | /codon_type=Intergenic                           |
|              | /taxa=A5                                         |
| SNP Position | 2195075                                          |
|              | /strand=reverse                                  |
|              | /SNP="C->A"                                      |
|              | /codon_type=Nonsynonymous                        |
|              | /taxa=PRL64, MBRN14, 4122, 4488, 4600,           |
|              | 4585, 4536, 4623, 4605, 4593,                    |
|              | 4552, 4551, 4642, 4656, 4646,                    |
|              | 4339, 4322                                       |
| SNP Position | 2195957                                          |
|              | /SNP="C->A"                                      |
|              | /codon_type=Intergenic                           |
|              | /taxa=A5, A31, A27, A185, A184,                  |
|              | A32, A177, A29, A180, A232,                      |

|              |                                                  |
|--------------|--------------------------------------------------|
|              | A231, A201, A186, A200, A193,                    |
|              | A390                                             |
| SNP Position | 2199537                                          |
|              | /SNP="C->T"                                      |
|              | /codon_type=Intergenic                           |
|              | /taxa=V109                                       |
| SNP Position | 2202492                                          |
|              | /strand=reverse                                  |
|              | /SNP="G->A"                                      |
|              | /codon_type=Nonsynonymous                        |
|              | /taxa=A397                                       |
| SNP Position | 2203923                                          |
|              | /SNP="C->T"                                      |
|              | /codon_type=Synonymous                           |
|              | /taxa=4675, 4663, 4662, A487_1, A487_2,          |
|              | CIRS101, 4679, MBN17, 2010EL_1798, 2010EL_1786,  |
|              | 2010EL_1792, IDHO1726, 4519, 4538, 4661,         |
|              | A488_2, A488_1                                   |
| SNP Position | 2205104                                          |
|              | /SNP="A->T"                                      |
|              | /codon_type=Nonsynonymous                        |
|              | /taxa=PRL5                                       |
| SNP Position | 2209726                                          |
|              | /strand=reverse                                  |
|              | /SNP="C->T"                                      |
|              | /codon_type=Nonsynonymous                        |
|              | /taxa=B33, 1627, 1346, 1362                      |
| SNP Position | 2212741                                          |
|              | /strand=reverse                                  |
|              | /SNP="G->A"                                      |
|              | /codon_type=Synonymous                           |
|              | /taxa=PRL18                                      |
| SNP Position | 2220453                                          |
|              | /strand=reverse                                  |
|              | /SNP="A->C"                                      |
|              | /codon_type=Nonsynonymous                        |
|              | /taxa=MG116025                                   |
| SNP Position | 2230784                                          |
|              | /strand=reverse                                  |
|              | /SNP="G->A"                                      |
|              | /codon_type=Nonsynonymous                        |
|              | /taxa=A152, A155, A154                           |
| SNP Position | 2234269                                          |
|              | /strand=reverse                                  |
|              | /SNP="C->T"                                      |
|              | /codon_type=Nonsynonymous                        |
|              | /taxa=MG116025, MG116226, 4660, 4675, 4663,      |
|              | 4662, A487_1, A487_2, CIRS101, 4679, MBN17,      |
|              | 2010EL_1798, 2010EL_1786, 2010EL_1792, IDHO1726, |
|              | 4519, 4538, 4661, A488_2, A488_1,                |
|              | PRL64, MBRN14, 4122, 4488, 4600,                 |
|              | 4585, 4536, 4623, 4605, 4593,                    |
|              | 4552, 4551, 4642, 4656, 4646,                    |

|              |                                           |
|--------------|-------------------------------------------|
|              | 4339, 4322, 4784, 6210, 6215,             |
|              | 6214, 6212, 6196, 6191, 6195,             |
|              | 6193, 6194, 6201, 6197, 6180,             |
|              | A482, A483, A481, 7682, 7684,             |
|              | 7687, 7685, 7686, V5, V109,               |
|              | A130, A131, VC51, V212-1, MJ1485, MJ1236, |
|              | A346_2, A346_1, B33, 1627, 1346, 1362,    |
|              | 4670, 4672, 4121, 4110, 4111,             |
|              | 4113, A109, A383, A330, MO10              |
| SNP Position | 2234741                                   |
|              | /strand=reverse                           |
|              | /SNP="C->T"                               |
|              | /codon_type=Nonsynonymous                 |
|              | /taxa=MJ1485                              |
| SNP Position | 2239378                                   |
|              | /strand=reverse                           |
|              | /SNP="G->A"                               |
|              | /codon_type=Nonsynonymous                 |
|              | /taxa=4111, 4113                          |
| SNP Position | 2240233                                   |
|              | /strand=reverse                           |
|              | /SNP="C->T"                               |
|              | /codon_type=Nonsynonymous                 |
|              | /taxa=IDHO1726                            |
| SNP Position | 2241477                                   |
|              | /strand=reverse                           |
|              | /SNP="C->T"                               |
|              | /codon_type=Synonymous                    |
|              | /taxa=PRL18                               |
| SNP Position | 2242015                                   |
|              | /SNP="A->G"                               |
|              | /codon_type=Synonymous                    |
|              | /taxa=MBRN14, 4122, 4488, 4600, 4585,     |
|              | 4536, 4623, 4605, 4593, 4552,             |
|              | 4551, 4642, 4656, 4646, 4339, 4322        |
| SNP Position | 2244263                                   |
|              | /strand=reverse                           |
|              | /SNP="C->T"                               |
|              | /codon_type=Nonsynonymous                 |
|              | /taxa=A330                                |
| SNP Position | 2249858                                   |
|              | /strand=reverse                           |
|              | /SNP="C->T"                               |
|              | /codon_type=Nonsynonymous                 |
|              | /taxa=4784                                |
| SNP Position | 2252639                                   |
|              | /strand=reverse                           |
|              | /SNP="T->A"                               |
|              | /codon_type=Synonymous                    |
|              | /taxa=M66, A6                             |
| SNP Position | 2257626                                   |
|              | /strand=reverse                           |
|              | /SNP="C->T"                               |



|              |                                     |
|--------------|-------------------------------------|
|              | /codon_type=Synonymous              |
|              | /taxa=6196, 6191, 6195, 6193, 6194, |
|              | 6201, 6197, 6180                    |
| SNP Position | 2269996                             |
|              | /strand=reverse                     |
|              | /SNP="A->C"                         |
|              | /codon_type=Nonsynonymous           |
|              | /taxa=GP145, GP160, GP106           |
| SNP Position | 2271272                             |
|              | /SNP="A->G"                         |
|              | /codon_type=Intergenic              |
|              | /taxa=B33, 1627, 1346, 1362         |
| SNP Position | 2276983                             |
|              | /strand=reverse                     |
|              | /SNP="C->T"                         |
|              | /codon_type=Nonsynonymous           |
|              | /taxa=7682, 7684, 7687, 7685, 7686  |
| SNP Position | 2278816                             |
|              | /strand=reverse                     |
|              | /SNP="G->A"                         |
|              | /codon_type=Nonsynonymous           |
|              | /taxa=A383                          |
| SNP Position | 2278843                             |
|              | /strand=reverse                     |
|              | /SNP="G->A"                         |
|              | /codon_type=Nonsynonymous           |
|              | /taxa=GP140                         |
| SNP Position | 2280006                             |
|              | /strand=reverse                     |
|              | /SNP="G->A"                         |
|              | /codon_type=Synonymous              |
|              | /taxa=4122                          |
| SNP Position | 2284771                             |
|              | /strand=reverse                     |
|              | /SNP="C->T"                         |
|              | /codon_type=Nonsynonymous           |
|              | /taxa=A152, A155, A154              |
| SNP Position | 2285310                             |
|              | /strand=reverse                     |
|              | /SNP="G->A"                         |
|              | /codon_type=Nonsynonymous           |
|              | /taxa=A4                            |
| SNP Position | 2285392                             |
|              | /strand=reverse                     |
|              | /SNP="G->A"                         |
|              | /codon_type=Nonsynonymous           |
|              | /taxa=A4                            |
| SNP Position | 2285402                             |
|              | /strand=reverse                     |
|              | /SNP="G->A"                         |
|              | /codon_type=Synonymous              |
|              | /taxa=A482, A483, A481, 7682, 7684, |
|              | 7687, 7685, 7686                    |

|              |                                                  |
|--------------|--------------------------------------------------|
| SNP Position | 2285990                                          |
|              | /strand=reverse                                  |
|              | /SNP="G->A"                                      |
|              | /codon_type=Nonsynonymous                        |
|              | /taxa=A245, A241                                 |
| SNP Position | 2290774                                          |
|              | /strand=reverse                                  |
|              | /SNP="G->A"                                      |
|              | /codon_type=Synonymous                           |
|              | /taxa=4784                                       |
| SNP Position | 2293449                                          |
|              | /SNP="T->C"                                      |
|              | /codon_type=Intergenic                           |
|              | /taxa=A4                                         |
| SNP Position | 2295509                                          |
|              | /strand=reverse                                  |
|              | /SNP="T->C"                                      |
|              | /codon_type=Nonsynonymous                        |
|              | /taxa=MG116025, MG116226, 4660, 4675, 4663,      |
|              | 4662, A487_1, A487_2, CIRS101, 4679, MBN17,      |
|              | 2010EL_1798, 2010EL_1786, 2010EL_1792, IDHO1726, |
|              | 4519, 4538, 4661, A488_2, A488_1,                |
|              | PRL64, MBRN14, 4122, 4488, 4600,                 |
|              | 4585, 4536, 4623, 4605, 4593,                    |
|              | 4552, 4551, 4642, 4656, 4646,                    |
|              | 4339, 4322, 4784, 6210, 6215,                    |
|              | 6214, 6212, 6196, 6191, 6195,                    |
|              | 6193, 6194, 6201, 6197, 6180,                    |
|              | A482, A483, A481, 7682, 7684,                    |
|              | 7687, 7685, 7686, V5, V109,                      |
|              | A130, A131, VC51, V212-1, MJ1485, MJ1236,        |
|              | A346_2, A346_1, B33, 1627, 1346, 1362,           |
|              | 4670, 4672, 4121, 4110, 4111,                    |
|              | 4113, A109, A383, A330, MO10                     |
| SNP Position | 2296343                                          |
|              | /strand=reverse                                  |
|              | /SNP="G->A"                                      |
|              | /codon_type=Nonsynonymous                        |
|              | /taxa=4672                                       |
| SNP Position | 2307684                                          |
|              | /SNP="C->T"                                      |
|              | /codon_type=Nonsynonymous                        |
|              | /taxa=MBN17                                      |
| SNP Position | 2309742                                          |
|              | /strand=reverse                                  |
|              | /SNP="A->C"                                      |
|              | /codon_type=Synonymous                           |
|              | /taxa=6210, 6215, 6214, 6212, 6196,              |
|              | 6191, 6195, 6193, 6194, 6201,                    |
|              | 6197, 6180                                       |
| SNP Position | 2314294                                          |
|              | /SNP="T->C"                                      |
|              | /codon_type=Synonymous                           |

|              |                                        |
|--------------|----------------------------------------|
|              | /taxa=GP145, GP160, GP106              |
| SNP Position | 2316840                                |
|              | /SNP="G->A"                            |
|              | /codon_type=Synonymous                 |
|              | /taxa=A383                             |
| SNP Position | 2317964                                |
|              | /SNP="C->T"                            |
|              | /codon_type=Intergenic                 |
|              | /taxa=PRL64, MBRN14, 4122, 4488, 4600, |
|              | 4585, 4536, 4623, 4605, 4593,          |
|              | 4552, 4551, 4642, 4656, 4646,          |
|              | 4339, 4322                             |
| SNP Position | 2319056                                |
|              | /strand=reverse                        |
|              | /SNP="C->T"                            |
|              | /codon_type=Nonsynonymous              |
|              | /taxa=B33, 1627, 1346, 1362            |
| SNP Position | 2322962                                |
|              | /strand=reverse                        |
|              | /SNP="A->T"                            |
|              | /codon_type=Nonsynonymous              |
|              | /taxa=RC9                              |
| SNP Position | 2330411                                |
|              | /SNP="A->T"                            |
|              | /codon_type=Nonsynonymous              |
|              | /taxa=CIRS101                          |
| SNP Position | 2331087                                |
|              | /SNP="C->A"                            |
|              | /codon_type=Intergenic                 |
|              | /taxa=CIRS101                          |
| SNP Position | 2331267                                |
|              | /SNP="G->T"                            |
|              | /codon_type=Intergenic                 |
|              | /taxa=CIRS101                          |
| SNP Position | 2331305                                |
|              | /SNP="C->G"                            |
|              | /codon_type=Intergenic                 |
|              | /taxa=CIRS101                          |
| SNP Position | 2331336                                |
|              | /SNP="T->C"                            |
|              | /codon_type=Intergenic                 |
|              | /taxa=CIRS101                          |
| SNP Position | 2331822                                |
|              | /SNP="G->A"                            |
|              | /codon_type=Intergenic                 |
|              | /taxa=A152, A155, A154                 |
| SNP Position | 2332025                                |
|              | /SNP="C->A"                            |
|              | /codon_type=Intergenic                 |
|              | /taxa=4605, 4593, 4552, 4551           |
| SNP Position | 2332617                                |
|              | /SNP="T->C"                            |
|              | /codon_type=Intergenic                 |

|              |                                             |
|--------------|---------------------------------------------|
|              | /taxa=2010EL_1798, 2010EL_1786, 2010EL_1792 |
| SNP Position | 2334969                                     |
|              | /strand=reverse                             |
|              | /SNP="G->A"                                 |
|              | /codon_type=Synonymous                      |
|              | /taxa=6196, 6191, 6195, 6193, 6194,         |
|              | 6201, 6197, 6180                            |
| SNP Position | 2336701                                     |
|              | /strand=reverse                             |
|              | /SNP="G->A"                                 |
|              | /codon_type=Nonsynonymous                   |
|              | /taxa=4784, 6210, 6215, 6214, 6212,         |
|              | 6196, 6191, 6195, 6193, 6194,               |
|              | 6201, 6197, 6180, A482, A483,               |
|              | A481, 7682, 7684, 7687, 7685,               |
|              | 7686                                        |
| SNP Position | 2338446                                     |
|              | /strand=reverse                             |
|              | /SNP="G->A"                                 |
|              | /codon_type=Nonsynonymous                   |
|              | /taxa=A5, A31, A27, A185, A184,             |
|              | A32, A177, A29, A180, A232,                 |
|              | A231, A201, A186, A200, A193,               |
|              | A390, GP145, GP160, GP106, A152,            |
|              | A155, A154, A4                              |
| SNP Position | 2341594                                     |
|              | /SNP="A->G"                                 |
|              | /codon_type=Intergenic                      |
|              | /taxa=A4                                    |
| SNP Position | 2352451                                     |
|              | /SNP="G->A"                                 |
|              | /codon_type=Nonsynonymous                   |
|              | /taxa=A31, A27, A185, A184, A32,            |
|              | A177, A29, A180, A232, A231,                |
|              | A201, A186, A200, A193, A390                |
| SNP Position | 2354778                                     |
|              | /SNP="C->T"                                 |
|              | /codon_type=Intergenic                      |
|              | /taxa=A4                                    |
| SNP Position | 2354989                                     |
|              | /SNP="C->T"                                 |
|              | /codon_type=Intergenic                      |
|              | /taxa=RC9                                   |
| SNP Position | 2356525                                     |
|              | /SNP="A->G"                                 |
|              | /codon_type=Intergenic                      |
|              | /taxa=GP152, A397, A22                      |
| SNP Position | 2361418                                     |
|              | /strand=reverse                             |
|              | /SNP="G->A"                                 |
|              | /codon_type=Nonsynonymous                   |
|              | /taxa=A4                                    |
| SNP Position | 2364889                                     |

|              |                                                 |
|--------------|-------------------------------------------------|
|              | /SNP="A->G"                                     |
|              | /codon_type=Synonymous                          |
|              | /taxa=4660, 4675, 4663, 4662, A487_1,           |
|              | A487_2, CIRS101, 4679, MBN17, 2010EL_1798,      |
|              | 2010EL_1786, 2010EL_1792, IDHO1726, 4519, 4538, |
|              | 4661, A488_2, A488_1, PRL64, MBRN14,            |
|              | 4122, 4488, 4600, 4585, 4536,                   |
|              | 4623, 4605, 4593, 4552, 4551,                   |
|              | 4642, 4656, 4646, 4339, 4322,                   |
|              | 4784, 6210, 6215, 6214, 6212,                   |
|              | 6196, 6191, 6195, 6193, 6194,                   |
|              | 6201, 6197, 6180, A482, A483,                   |
|              | A481, 7682, 7684, 7687, 7685,                   |
|              | 7686                                            |
| SNP Position | 2376053                                         |
|              | /SNP="G->A"                                     |
|              | /codon_type=Nonsynonymous                       |
|              | /taxa=A4                                        |
| SNP Position | 2379302                                         |
|              | /strand=reverse                                 |
|              | /SNP="G->A"                                     |
|              | /codon_type=Nonsynonymous                       |
|              | /taxa=4661, A488_2, A488_1                      |
| SNP Position | 2385139                                         |
|              | /SNP="T->C"                                     |
|              | /codon_type=Synonymous                          |
|              | /taxa=M66, A6                                   |
| SNP Position | 2389486                                         |
|              | /strand=reverse                                 |
|              | /SNP="C->T"                                     |
|              | /codon_type=Nonsynonymous                       |
|              | /taxa=RC9                                       |
| SNP Position | 2389816                                         |
|              | /strand=reverse                                 |
|              | /SNP="T->A"                                     |
|              | /codon_type=Nonsynonymous                       |
|              | /taxa=4675                                      |
| SNP Position | 2396433                                         |
|              | /strand=reverse                                 |
|              | /SNP="C->T"                                     |
|              | /codon_type=Nonsynonymous                       |
|              | /taxa=A130, A131                                |
| SNP Position | 2398634                                         |
|              | /strand=reverse                                 |
|              | /SNP="T->C"                                     |
|              | /codon_type=Nonsynonymous                       |
|              | /taxa=A152, A155, A154                          |
| SNP Position | 2400819                                         |
|              | /strand=reverse                                 |
|              | /SNP="C->T"                                     |
|              | /codon_type=Synonymous                          |
|              | /taxa=A383                                      |
| SNP Position | 2405978                                         |

|              |                                                 |
|--------------|-------------------------------------------------|
|              | /strand=reverse                                 |
|              | /SNP="A->C"                                     |
|              | /codon_type=Nonsynonymous                       |
|              | /taxa=2010EL_1798, 2010EL_1786, 2010EL_1792     |
| SNP Position | 2406103                                         |
|              | /strand=reverse                                 |
|              | /SNP="T->C"                                     |
|              | /codon_type=Synonymous                          |
|              | /taxa=1627                                      |
| SNP Position | 2408713                                         |
|              | /strand=reverse                                 |
|              | /SNP="G->A"                                     |
|              | /codon_type=Nonsynonymous                       |
|              | /taxa=A4                                        |
| SNP Position | 2408967                                         |
|              | /strand=reverse                                 |
|              | /SNP="A->G"                                     |
|              | /codon_type=Synonymous                          |
|              | /taxa=A383                                      |
| SNP Position | 2412210                                         |
|              | /strand=reverse                                 |
|              | /SNP="A->G"                                     |
|              | /codon_type=Nonsynonymous                       |
|              | /taxa=A4                                        |
| SNP Position | 2412928                                         |
|              | /strand=reverse                                 |
|              | /SNP="A->G"                                     |
|              | /codon_type=Synonymous                          |
|              | /taxa=4585                                      |
| SNP Position | 2419231                                         |
|              | /SNP="C->A"                                     |
|              | /codon_type=Nonsynonymous                       |
|              | /taxa=A397, A22                                 |
| SNP Position | 2421349                                         |
|              | /strand=reverse                                 |
|              | /SNP="C->T"                                     |
|              | /codon_type=Nonsynonymous                       |
|              | /taxa=GP60                                      |
| SNP Position | 2424485                                         |
|              | /strand=reverse                                 |
|              | /SNP="G->A"                                     |
|              | /codon_type=Synonymous                          |
|              | /taxa=4784                                      |
| SNP Position | 2424786                                         |
|              | /strand=reverse                                 |
|              | /SNP="C->T"                                     |
|              | /codon_type=Synonymous                          |
|              | /taxa=4675, 4663, 4662, A487_1, A487_2,         |
|              | CIRS101, 4679, MBN17, 2010EL_1798, 2010EL_1786, |
|              | 2010EL_1792, IDHO1726, 4519, 4538, 4661,        |
|              | A488_2, A488_1                                  |
| SNP Position | 2426059                                         |
|              | /strand=reverse                                 |

|              |                                                  |
|--------------|--------------------------------------------------|
|              | /SNP="C->T"                                      |
|              | /codon_type=Synonymous                           |
|              | /taxa=A383                                       |
| SNP Position | 2427908                                          |
|              | /strand=reverse                                  |
|              | /SNP="G->A"                                      |
|              | /codon_type=Synonymous                           |
|              | /taxa=A383                                       |
| SNP Position | 2429887                                          |
|              | /strand=reverse                                  |
|              | /SNP="C->A"                                      |
|              | /codon_type=Synonymous                           |
|              | /taxa=MG116025, MG116226, 4660, 4675, 4663,      |
|              | 4662, A487_1, A487_2, CIRS101, 4679, MBN17,      |
|              | 2010EL_1798, 2010EL_1786, 2010EL_1792, IDHO1726, |
|              | 4519, 4538, 4661, A488_2, A488_1,                |
|              | PRL64, MBRN14, 4122, 4488, 4600,                 |
|              | 4585, 4536, 4623, 4605, 4593,                    |
|              | 4552, 4551, 4642, 4656, 4646,                    |
|              | 4339, 4322, 4784, 6210, 6215,                    |
|              | 6214, 6212, 6196, 6191, 6195,                    |
|              | 6193, 6194, 6201, 6197, 6180,                    |
|              | A482, A483, A481, 7682, 7684,                    |
|              | 7687, 7685, 7686, V5, V109,                      |
|              | A130, A131, VC51, V212-1, MJ1485, MJ1236,        |
|              | A346_2, A346_1, B33, 1627, 1346, 1362,           |
|              | 4670, 4672, 4121, 4110, 4111,                    |
|              | 4113, A109, A383, A330, MO10, PRL5,              |
|              | A316, A245, A241, A10, GP140, RC9,               |
|              | GP143, GP152, A397, A22, GP60, N16961,           |
|              | A19, A5, A31, A27, A185,                         |
|              | A184, A32, A177, A29, A180,                      |
|              | A232, A231, A201, A186, A200,                    |
|              | A193, A390, GP145, GP160, GP106,                 |
|              | A152, A155, A154, A4, PRL18                      |
| SNP Position | 2436847                                          |
|              | /SNP="A->G"                                      |
|              | /codon_type=Nonsynonymous                        |
|              | /taxa=A4                                         |
| SNP Position | 2437098                                          |
|              | /SNP="G->A"                                      |
|              | /codon_type=Nonsynonymous                        |
|              | /taxa=A5, A31, A27, A185, A184,                  |
|              | A32, A177, A29, A180, A232,                      |
|              | A231, A201, A186, A200, A193,                    |
|              | A390                                             |
| SNP Position | 2437224                                          |
|              | /SNP="C->T"                                      |
|              | /codon_type=Synonymous                           |
|              | /taxa=A5, A31, A27, A185, A184,                  |
|              | A32, A177, A29, A180, A232,                      |
|              | A231, A201, A186, A200, A193,                    |
|              | A390                                             |

|              |                                                  |
|--------------|--------------------------------------------------|
| SNP Position | 2439803                                          |
|              | /strand=reverse                                  |
|              | /SNP="C->A"                                      |
|              | /codon_type=SNOP (non-stop codon to stop condon) |
|              | /taxa=PRL18                                      |
| SNP Position | 2441051                                          |
|              | /strand=reverse                                  |
|              | /SNP="C->A"                                      |
|              | /codon_type=SNOP (non-stop codon to stop condon) |
|              | /taxa=MG116025, MG116226, 4660, 4675, 4663,      |
|              | 4662, A487_1, A487_2, CIRS101, 4679, MBN17,      |
|              | 2010EL_1798, 2010EL_1786, 2010EL_1792, IDHO1726, |
|              | 4519, 4538, 4661, A488_2, A488_1,                |
|              | PRL64, MBRN14, 4122, 4488, 4600,                 |
|              | 4585, 4536, 4623, 4605, 4593,                    |
|              | 4552, 4551, 4642, 4656, 4646,                    |
|              | 4339, 4322, 4784, 6210, 6215,                    |
|              | 6214, 6212, 6196, 6191, 6195,                    |
|              | 6193, 6194, 6201, 6197, 6180,                    |
|              | A482, A483, A481, 7682, 7684,                    |
|              | 7687, 7685, 7686, V5, V109,                      |
|              | A130, A131, VC51, V212-1, MJ1485, MJ1236,        |
|              | A346_2, A346_1, B33, 1627, 1346, 1362,           |
|              | 4670, 4672, 4121, 4110, 4111,                    |
|              | 4113, A109, A383, A330, MO10, PRL5,              |
|              | A316                                             |
| SNP Position | 2441908                                          |
|              | /strand=reverse                                  |
|              | /SNP="C->A"                                      |
|              | /codon_type=Nonsynonymous                        |
|              | /taxa=4784, 6210, 6215, 6214, 6212,              |
|              | 6196, 6191, 6195, 6193, 6194,                    |
|              | 6201, 6197, 6180, A482, A483,                    |
|              | A481, 7682, 7684, 7687, 7685,                    |
|              | 7686                                             |
| SNP Position | 2443521                                          |
|              | /SNP="G->A"                                      |
|              | /codon_type=Intergenic                           |
|              | /taxa=4661, A488_2, A488_1                       |
| SNP Position | 2444399                                          |
|              | /strand=reverse                                  |
|              | /SNP="C->T"                                      |
|              | /codon_type=Nonsynonymous                        |
|              | /taxa=A4                                         |
| SNP Position | 2450006                                          |
|              | /strand=reverse                                  |
|              | /SNP="G->A"                                      |
|              | /codon_type=Nonsynonymous                        |
|              | /taxa=GP145, GP160, GP106                        |
| SNP Position | 2454053                                          |
|              | /SNP="C->T"                                      |
|              | /codon_type=Nonsynonymous                        |
|              | /taxa=A346_2, A346_1                             |



|              |                                             |
|--------------|---------------------------------------------|
| SNP Position | 2463193                                     |
|              | /strand=reverse                             |
|              | /SNP="C->T"                                 |
|              | /codon_type=Synonymous                      |
|              | /taxa=4519                                  |
| SNP Position | 2466625                                     |
|              | /strand=reverse                             |
|              | /SNP="T->C"                                 |
|              | /codon_type=Nonsynonymous                   |
|              | /taxa=2010EL_1798, 2010EL_1786, 2010EL_1792 |
| SNP Position | 2466776                                     |
|              | /strand=reverse                             |
|              | /SNP="G->A"                                 |
|              | /codon_type=Nonsynonymous                   |
|              | /taxa=A4                                    |
| SNP Position | 2468457                                     |
|              | /strand=reverse                             |
|              | /SNP="T->A"                                 |
|              | /codon_type=Synonymous                      |
|              | /taxa=PRL64, MBRN14, 4122, 4488, 4600,      |
|              | 4585, 4536, 4623, 4605, 4593,               |
|              | 4552, 4551, 4642, 4656, 4646,               |
|              | 4339, 4322                                  |
| SNP Position | 2473028                                     |
|              | /strand=reverse                             |
|              | /SNP="G->A"                                 |
|              | /codon_type=Synonymous                      |
|              | /taxa=A185, A184                            |
| SNP Position | 2475344                                     |
|              | /strand=reverse                             |
|              | /SNP="C->T"                                 |
|              | /codon_type=Synonymous                      |
|              | /taxa=A4                                    |
| SNP Position | 2476933                                     |
|              | /strand=reverse                             |
|              | /SNP="G->A"                                 |
|              | /codon_type=Nonsynonymous                   |
|              | /taxa=IDHO1726                              |
| SNP Position | 2477152                                     |
|              | /strand=reverse                             |
|              | /SNP="C->T"                                 |
|              | /codon_type=Nonsynonymous                   |
|              | /taxa=B33                                   |
| SNP Position | 2478488                                     |
|              | /SNP="C->T"                                 |
|              | /codon_type=Synonymous                      |
|              | /taxa=A152, A155, A154                      |
| SNP Position | 2481394                                     |
|              | /strand=reverse                             |
|              | /SNP="A->G"                                 |
|              | /codon_type=Synonymous                      |
|              | /taxa=A245                                  |
| SNP Position | 2483263                                     |

|              |                                                                                                         |
|--------------|---------------------------------------------------------------------------------------------------------|
|              | /SNP="G->A"                                                                                             |
|              | /codon_type=Nonsynonymous                                                                               |
|              | /taxa=MBN17, 2010EL_1798, 2010EL_1786, 2010EL_1792,<br>IDHO1726, 4519, 4538                             |
| SNP Position | 2485931                                                                                                 |
|              | /SNP="G->A"                                                                                             |
|              | /codon_type=Nonsynonymous                                                                               |
|              | /taxa=IDHO1726                                                                                          |
| SNP Position | 2486542                                                                                                 |
|              | /SNP="C->T"                                                                                             |
|              | /codon_type=Nonsynonymous                                                                               |
|              | /taxa=V109                                                                                              |
| SNP Position | 2486548                                                                                                 |
|              | /SNP="T->C"                                                                                             |
|              | /codon_type=Nonsynonymous                                                                               |
|              | /taxa=GP140                                                                                             |
| SNP Position | 2489012                                                                                                 |
|              | /SNP="G->T"                                                                                             |
|              | /codon_type=Intergenic                                                                                  |
|              | /taxa=RC9, GP143                                                                                        |
| SNP Position | 2489368                                                                                                 |
|              | /SNP="G->A"                                                                                             |
|              | /codon_type=Intergenic                                                                                  |
|              | /taxa=A5, A31, A27, A185, A184,<br>A32, A177, A29, A180, A232,<br>A231, A201, A186, A200, A193,<br>A390 |
| SNP Position | 2495278                                                                                                 |
|              | /SNP="C->T"                                                                                             |
|              | /codon_type=Nonsynonymous                                                                               |
|              | /taxa=A4                                                                                                |
| SNP Position | 2496548                                                                                                 |
|              | /strand=reverse                                                                                         |
|              | /SNP="C->T"                                                                                             |
|              | /codon_type=Nonsynonymous                                                                               |
|              | /taxa=A6                                                                                                |
| SNP Position | 2497048                                                                                                 |
|              | /strand=reverse                                                                                         |
|              | /SNP="T->C"                                                                                             |
|              | /codon_type=Nonsynonymous                                                                               |
|              | /taxa=A152, A155, A154                                                                                  |
| SNP Position | 2497797                                                                                                 |
|              | /strand=reverse                                                                                         |
|              | /SNP="A->G"                                                                                             |
|              | /codon_type=Synonymous                                                                                  |
|              | /taxa=A180                                                                                              |
| SNP Position | 2501343                                                                                                 |
|              | /SNP="C->T"                                                                                             |
|              | /codon_type=Synonymous                                                                                  |
|              | /taxa=V109                                                                                              |
| SNP Position | 2506199                                                                                                 |
|              | /strand=reverse                                                                                         |
|              | /SNP="G->A"                                                                                             |

|              |                                                  |
|--------------|--------------------------------------------------|
|              | /codon_type=Synonymous                           |
|              | /taxa=4670                                       |
| SNP Position | 2508494                                          |
|              | /strand=reverse                                  |
|              | /SNP="A->G"                                      |
|              | /codon_type=Nonsynonymous                        |
|              | /taxa=V5                                         |
| SNP Position | 2509420                                          |
|              | /strand=reverse                                  |
|              | /SNP="A->C"                                      |
|              | /codon_type=Nonsynonymous                        |
|              | /taxa=4642, 4656, 4646                           |
| SNP Position | 2513615                                          |
|              | /SNP="G->A"                                      |
|              | /codon_type=Intergenic                           |
|              | /taxa=A152, A155, A154                           |
| SNP Position | 2515178                                          |
|              | /strand=reverse                                  |
|              | /SNP="G->A"                                      |
|              | /codon_type=Nonsynonymous                        |
|              | /taxa=PRL18                                      |
| SNP Position | 2515595                                          |
|              | /SNP="T->C"                                      |
|              | /codon_type=Intergenic                           |
|              | /taxa=A31, A27, A185, A184, A32,                 |
|              | A177, A29, A180, A232, A231,                     |
|              | A201, A186, A200, A193, A390                     |
| SNP Position | 2515959                                          |
|              | /SNP="C->A"                                      |
|              | /codon_type=Intergenic                           |
|              | /taxa=6210, 6215, 6214, 6212, 6196,              |
|              | 6191, 6195, 6193, 6194, 6201,                    |
|              | 6197, 6180                                       |
| SNP Position | 2516632                                          |
|              | /strand=reverse                                  |
|              | /SNP="C->T"                                      |
|              | /codon_type=Nonsynonymous                        |
|              | /taxa=4121, 4110, 4111, 4113                     |
| SNP Position | 2517042                                          |
|              | /SNP="G->T"                                      |
|              | /codon_type=Intergenic                           |
|              | /taxa=PRL64                                      |
| SNP Position | 2518818                                          |
|              | /strand=reverse                                  |
|              | /SNP="A->G"                                      |
|              | /codon_type=Nonsynonymous                        |
|              | /taxa=MG116025, MG116226, 4660, 4675, 4663,      |
|              | 4662, A487_1, A487_2, CIRS101, 4679, MBN17,      |
|              | 2010EL_1798, 2010EL_1786, 2010EL_1792, IDHO1726, |
|              | 4519, 4538, 4661, A488_2, A488_1,                |
|              | PRL64, MBRN14, 4122, 4488, 4600,                 |
|              | 4585, 4536, 4623, 4605, 4593,                    |
|              | 4552, 4551, 4642, 4656, 4646,                    |

|              |                                                     |
|--------------|-----------------------------------------------------|
|              | 4339, 4322, 4784, 6210, 6215,                       |
|              | 6214, 6212, 6196, 6191, 6195,                       |
|              | 6193, 6194, 6201, 6197, 6180,                       |
|              | A482, A483, A481, 7682, 7684,                       |
|              | 7687, 7685, 7686, V5, V109,                         |
|              | A130, A131, VC51, V212-1, MJ1485, MJ1236,           |
|              | A346_2, A346_1, B33, 1627, 1346, 1362,              |
|              | 4670, 4672, 4121, 4110, 4111,                       |
|              | 4113, A109, A383, A330, MO10, PRL5,                 |
|              | A316, A245, A241, A10, GP140                        |
| SNP Position | 2523254                                             |
|              | /SNP="A->G"                                         |
|              | /codon_type=Synonymous                              |
|              | /taxa=4784, 6210, 6215, 6214, 6212,                 |
|              | 6196, 6191, 6195, 6193, 6194,                       |
|              | 6201, 6197, 6180, A482, A483,                       |
|              | A481, 7682, 7684, 7687, 7685,                       |
|              | 7686                                                |
| SNP Position | 2524140                                             |
|              | /strand=reverse                                     |
|              | /SNP="A->G"                                         |
|              | /codon_type=Nonsynonymous                           |
|              | /taxa=4121, 4110, 4111, 4113                        |
| SNP Position | 2524819                                             |
|              | /SNP="C->T"                                         |
|              | /codon_type=Nonsynonymous                           |
|              | /taxa=V5                                            |
| SNP Position | 2524822                                             |
|              | /SNP="G->A"                                         |
|              | /homoplasy=convergence with branch leading to GP143 |
|              | /codon_type=Nonsynonymous                           |
|              | /taxa=MBN17                                         |
| SNP Position | 2524822                                             |
|              | /SNP="G->A"                                         |
|              | /homoplasy=convergence with branch leading to MBN17 |
|              | /codon_type=Nonsynonymous                           |
|              | /taxa=GP143                                         |
| SNP Position | 2525089                                             |
|              | /SNP="A->G"                                         |
|              | /codon_type=Nonsynonymous                           |
|              | /taxa=A4                                            |
| SNP Position | 2535649                                             |
|              | /SNP="G->A"                                         |
|              | /codon_type=Synonymous                              |
|              | /taxa=V5                                            |
| SNP Position | 2539644                                             |
|              | /SNP="C->T"                                         |
|              | /codon_type=Synonymous                              |
|              | /taxa=A330                                          |
| SNP Position | 2542470                                             |
|              | /SNP="G->A"                                         |
|              | /codon_type=Synonymous                              |
|              | /taxa=MJ1485, MJ1236                                |

|              |                                                  |
|--------------|--------------------------------------------------|
| SNP Position | 2543491                                          |
|              | /SNP="G->A"                                      |
|              | /codon_type=Nonsynonymous                        |
|              | /taxa=4322                                       |
| SNP Position | 2547742                                          |
|              | /SNP="C->T"                                      |
|              | /codon_type=Nonsynonymous                        |
|              | /taxa=MG116025, MG116226, 4660, 4675, 4663,      |
|              | 4662, A487_1, A487_2, CIRS101, 4679, MBN17,      |
|              | 2010EL_1798, 2010EL_1786, 2010EL_1792, IDHO1726, |
|              | 4519, 4538, 4661, A488_2, A488_1,                |
|              | PRL64, MBRN14, 4122, 4488, 4600,                 |
|              | 4585, 4536, 4623, 4605, 4593,                    |
|              | 4552, 4551, 4642, 4656, 4646,                    |
|              | 4339, 4322, 4784, 6210, 6215,                    |
|              | 6214, 6212, 6196, 6191, 6195,                    |
|              | 6193, 6194, 6201, 6197, 6180,                    |
|              | A482, A483, A481, 7682, 7684,                    |
|              | 7687, 7685, 7686, V5, V109,                      |
|              | A130, A131                                       |
| SNP Position | 2550743                                          |
|              | /SNP="C->T"                                      |
|              | /codon_type=Synonymous                           |
|              | /taxa=A4                                         |
| SNP Position | 2551703                                          |
|              | /SNP="A->G"                                      |
|              | /codon_type=Synonymous                           |
|              | /taxa=M66, A6                                    |
| SNP Position | 2551912                                          |
|              | /SNP="C->T"                                      |
|              | /codon_type=Nonsynonymous                        |
|              | /taxa=B33, 1627, 1346, 1362                      |
| SNP Position | 2552770                                          |
|              | /SNP="G->A"                                      |
|              | /codon_type=Nonsynonymous                        |
|              | /taxa=A4                                         |
| SNP Position | 2555105                                          |
|              | /strand=reverse                                  |
|              | /SNP="G->A"                                      |
|              | /codon_type=Nonsynonymous                        |
|              | /taxa=A10                                        |
| SNP Position | 2557134                                          |
|              | /strand=reverse                                  |
|              | /SNP="T->A"                                      |
|              | /codon_type=Synonymous                           |
|              | /taxa=4660                                       |
| SNP Position | 2558974                                          |
|              | /strand=reverse                                  |
|              | /SNP="G->A"                                      |
|              | /codon_type=Nonsynonymous                        |
|              | /taxa=MG116025, MG116226, 4660, 4675, 4663,      |
|              | 4662, A487_1, A487_2, CIRS101, 4679, MBN17,      |
|              | 2010EL_1798, 2010EL_1786, 2010EL_1792, IDHO1726, |

|              |                                             |
|--------------|---------------------------------------------|
|              | 4519, 4538, 4661, A488_2, A488_1,           |
|              | PRL64, MBRN14, 4122, 4488, 4600,            |
|              | 4585, 4536, 4623, 4605, 4593,               |
|              | 4552, 4551, 4642, 4656, 4646,               |
|              | 4339, 4322, 4784, 6210, 6215,               |
|              | 6214, 6212, 6196, 6191, 6195,               |
|              | 6193, 6194, 6201, 6197, 6180,               |
|              | A482, A483, A481, 7682, 7684,               |
|              | 7687, 7685, 7686, V5, V109,                 |
|              | A130, A131, VC51, V212-1, MJ1485, MJ1236,   |
|              | A346_2, A346_1, B33, 1627, 1346, 1362,      |
|              | 4670, 4672, 4121, 4110, 4111,               |
|              | 4113, A109, A383, A330, MO10, PRL5,         |
|              | A316, A245, A241, A10, GP140, RC9,          |
|              | GP143, GP152, A397, A22, GP60, N16961,      |
|              | A19, A5, A31, A27, A185,                    |
|              | A184, A32, A177, A29, A180,                 |
|              | A232, A231, A201, A186, A200,               |
|              | A193, A390, GP145, GP160, GP106,            |
|              | A152, A155, A154, A4, PRL18                 |
| SNP Position | 2577815                                     |
|              | /strand=reverse                             |
|              | /SNP="C->T"                                 |
|              | /codon_type=Nonsynonymous                   |
|              | /taxa=2010EL_1798, 2010EL_1786, 2010EL_1792 |
| SNP Position | 2584695                                     |
|              | /strand=reverse                             |
|              | /SNP="T->G"                                 |
|              | /codon_type=Nonsynonymous                   |
|              | /taxa=6210, 6215, 6214, 6212, 6196,         |
|              | 6191, 6195, 6193, 6194, 6201,               |
|              | 6197, 6180                                  |
| SNP Position | 2586760                                     |
|              | /strand=reverse                             |
|              | /SNP="T->C"                                 |
|              | /codon_type=Synonymous                      |
|              | /taxa=GP140                                 |
| SNP Position | 2586841                                     |
|              | /strand=reverse                             |
|              | /SNP="C->A"                                 |
|              | /codon_type=Nonsynonymous                   |
|              | /taxa=4111                                  |
| SNP Position | 2587665                                     |
|              | /strand=reverse                             |
|              | /SNP="C->T"                                 |
|              | /codon_type=Nonsynonymous                   |
|              | /taxa=GP145, GP160, GP106                   |
| SNP Position | 2587691                                     |
|              | /strand=reverse                             |
|              | /SNP="T->A"                                 |
|              | /codon_type=Nonsynonymous                   |
|              | /taxa=4519                                  |
| SNP Position | 2587890                                     |

|              |                                                                                                                        |
|--------------|------------------------------------------------------------------------------------------------------------------------|
|              | /strand=reverse                                                                                                        |
|              | /SNP="C->T"                                                                                                            |
|              | /codon_type=Nonsynonymous                                                                                              |
|              | /taxa=A4                                                                                                               |
| SNP Position | 2589327                                                                                                                |
|              | /SNP="C->A"                                                                                                            |
|              | /codon_type=Nonsynonymous                                                                                              |
|              | /taxa=A482, A483, A481, 7682, 7684,<br>7687, 7685, 7686                                                                |
| SNP Position | 2594944                                                                                                                |
|              | /SNP="G->A"                                                                                                            |
|              | /codon_type=Synonymous                                                                                                 |
|              | /taxa=VC51                                                                                                             |
| SNP Position | 2596835                                                                                                                |
|              | /SNP="G->A"                                                                                                            |
|              | /codon_type=Nonsynonymous                                                                                              |
|              | /taxa=A4                                                                                                               |
| SNP Position | 2596997                                                                                                                |
|              | /SNP="A->G"                                                                                                            |
|              | /codon_type=Intergenic                                                                                                 |
|              | /taxa=A4                                                                                                               |
| SNP Position | 2598498                                                                                                                |
|              | /SNP="G->A"                                                                                                            |
|              | /codon_type=Synonymous                                                                                                 |
|              | /taxa=A10                                                                                                              |
| SNP Position | 2604400                                                                                                                |
|              | /strand=reverse                                                                                                        |
|              | /SNP="C->T"                                                                                                            |
|              | /codon_type=Synonymous                                                                                                 |
|              | /taxa=A4                                                                                                               |
| SNP Position | 2605370                                                                                                                |
|              | /strand=reverse                                                                                                        |
|              | /SNP="G->A"                                                                                                            |
|              | /homoplasy=convergence with branch leading to 42                                                                       |
|              | /codon_type=Nonsynonymous                                                                                              |
|              | /taxa=MBN17, 2010EL_1798, 2010EL_1786, 2010EL_1792,<br>IDHO1726, 4519, 4538                                            |
| SNP Position | 2605370                                                                                                                |
|              | /strand=reverse                                                                                                        |
|              | /SNP="G->A"                                                                                                            |
|              | /homoplasy=convergence with branch leading to 24                                                                       |
|              | /codon_type=Nonsynonymous                                                                                              |
|              | /taxa=PRL64, MBRN14, 4122, 4488, 4600,<br>4585, 4536, 4623, 4605, 4593,<br>4552, 4551, 4642, 4656, 4646,<br>4339, 4322 |
| SNP Position | 2606817                                                                                                                |
|              | /strand=reverse                                                                                                        |
|              | /SNP="T->C"                                                                                                            |
|              | /codon_type=Nonsynonymous                                                                                              |
|              | /taxa=A4                                                                                                               |
| SNP Position | 2607944                                                                                                                |
|              | /strand=reverse                                                                                                        |

|              |                                        |
|--------------|----------------------------------------|
|              | /SNP="C->T"                            |
|              | /codon_type=Synonymous                 |
|              | /taxa=A4                               |
| SNP Position | 2608097                                |
|              | /strand=reverse                        |
|              | /SNP="A->G"                            |
|              | /codon_type=Synonymous                 |
|              | /taxa=4672                             |
| SNP Position | 2609068                                |
|              | /strand=reverse                        |
|              | /SNP="G->A"                            |
|              | /codon_type=Nonsynonymous              |
|              | /taxa=VC51                             |
| SNP Position | 2609393                                |
|              | /strand=reverse                        |
|              | /SNP="C->A"                            |
|              | /codon_type=Nonsynonymous              |
|              | /taxa=PRL64, MBRN14, 4122, 4488, 4600, |
|              | 4585, 4536, 4623, 4605, 4593,          |
|              | 4552, 4551, 4642, 4656, 4646,          |
|              | 4339, 4322                             |
| SNP Position | 2609868                                |
|              | /strand=reverse                        |
|              | /SNP="A->G"                            |
|              | /codon_type=Synonymous                 |
|              | /taxa=A4                               |
| SNP Position | 2610023                                |
|              | /strand=reverse                        |
|              | /SNP="G->A"                            |
|              | /codon_type=Nonsynonymous              |
|              | /taxa=MBRN14, 4122, 4488, 4600, 4585,  |
|              | 4536, 4623, 4605, 4593, 4552,          |
|              | 4551, 4642, 4656, 4646, 4339, 4322     |
| SNP Position | 2619351                                |
|              | /strand=reverse                        |
|              | /SNP="T->C"                            |
|              | /codon_type=Nonsynonymous              |
|              | /taxa=MG116025, MG116226               |
| SNP Position | 2625954                                |
|              | /SNP="C->T"                            |
|              | /codon_type=Nonsynonymous              |
|              | /taxa=A482, A483, A481, 7682, 7684,    |
|              | 7687, 7685, 7686                       |
| SNP Position | 2630882                                |
|              | /strand=reverse                        |
|              | /SNP="C->A"                            |
|              | /codon_type=Nonsynonymous              |
|              | /taxa=GP152                            |
| SNP Position | 2631910                                |
|              | /strand=reverse                        |
|              | /SNP="G->A"                            |
|              | /codon_type=Nonsynonymous              |
|              | /taxa=GP140                            |



|              |                                                  |
|--------------|--------------------------------------------------|
| SNP Position | 2635357                                          |
|              | /SNP="C->T"                                      |
|              | /codon_type=Nonsynonymous                        |
|              | /taxa=V109                                       |
| SNP Position | 2635690                                          |
|              | /SNP="G->A"                                      |
|              | /codon_type=Nonsynonymous                        |
|              | /taxa=A397, A22                                  |
| SNP Position | 2635704                                          |
|              | /SNP="G->A"                                      |
|              | /codon_type=Nonsynonymous                        |
|              | /taxa=V109                                       |
| SNP Position | 2637398                                          |
|              | /SNP="C->T"                                      |
|              | /codon_type=Synonymous                           |
|              | /taxa=B33, 1627, 1346, 1362                      |
| SNP Position | 2640124                                          |
|              | /strand=reverse                                  |
|              | /SNP="G->A"                                      |
|              | /codon_type=Nonsynonymous                        |
|              | /taxa=A4                                         |
| SNP Position | 2646922                                          |
|              | /strand=reverse                                  |
|              | /SNP="C->T"                                      |
|              | /codon_type=Nonsynonymous                        |
|              | /taxa=A109                                       |
| SNP Position | 2653262                                          |
|              | /SNP="G->A"                                      |
|              | /codon_type=Synonymous                           |
|              | /taxa=MG116025, MG116226, 4660, 4675, 4663,      |
|              | 4662, A487_1, A487_2, CIRS101, 4679, MBN17,      |
|              | 2010EL_1798, 2010EL_1786, 2010EL_1792, IDHO1726, |
|              | 4519, 4538, 4661, A488_2, A488_1,                |
|              | PRL64, MBRN14, 4122, 4488, 4600,                 |
|              | 4585, 4536, 4623, 4605, 4593,                    |
|              | 4552, 4551, 4642, 4656, 4646,                    |
|              | 4339, 4322, 4784, 6210, 6215,                    |
|              | 6214, 6212, 6196, 6191, 6195,                    |
|              | 6193, 6194, 6201, 6197, 6180,                    |
|              | A482, A483, A481, 7682, 7684,                    |
|              | 7687, 7685, 7686, V5, V109,                      |
|              | A130, A131, VC51, V212-1, MJ1485, MJ1236,        |
|              | A346_2, A346_1, B33, 1627, 1346, 1362,           |
|              | 4670, 4672, 4121, 4110, 4111,                    |
|              | 4113, A109, A383, A330, MO10, PRL5,              |
|              | A316, A245, A241, A10, GP140, RC9,               |
|              | GP143, GP152, A397, A22, GP60, N16961,           |
|              | A19                                              |
| SNP Position | 2653477                                          |
|              | /SNP="G->A"                                      |
|              | /codon_type=Nonsynonymous                        |
|              | /taxa=A4                                         |
| SNP Position | 2657172                                          |

|              |                                                  |
|--------------|--------------------------------------------------|
|              | /strand=reverse                                  |
|              | /SNP="G->A"                                      |
|              | /codon_type=Nonsynonymous                        |
|              | /taxa=MG116025, MG116226, 4660, 4675, 4663,      |
|              | 4662, A487_1, A487_2, CIRS101, 4679, MBN17,      |
|              | 2010EL_1798, 2010EL_1786, 2010EL_1792, IDHO1726, |
|              | 4519, 4538, 4661, A488_2, A488_1,                |
|              | PRL64, MBRN14, 4122, 4488, 4600,                 |
|              | 4585, 4536, 4623, 4605, 4593,                    |
|              | 4552, 4551, 4642, 4656, 4646,                    |
|              | 4339, 4322, 4784, 6210, 6215,                    |
|              | 6214, 6212, 6196, 6191, 6195,                    |
|              | 6193, 6194, 6201, 6197, 6180,                    |
|              | A482, A483, A481, 7682, 7684,                    |
|              | 7687, 7685, 7686, V5, V109,                      |
|              | A130, A131, VC51, V212-1, MJ1485, MJ1236,        |
|              | A346_2, A346_1, B33, 1627, 1346, 1362,           |
|              | 4670, 4672, 4121, 4110, 4111,                    |
|              | 4113, A109, A383, A330, MO10, PRL5,              |
|              | A316                                             |
| SNP Position | 2657602                                          |
|              | /strand=reverse                                  |
|              | /SNP="C->T"                                      |
|              | /codon_type=Nonsynonymous                        |
|              | /taxa=4623                                       |
| SNP Position | 2661564                                          |
|              | /strand=reverse                                  |
|              | /SNP="C->T"                                      |
|              | /codon_type=Synonymous                           |
|              | /taxa=4672                                       |
| SNP Position | 2667703                                          |
|              | /strand=reverse                                  |
|              | /SNP="G->A"                                      |
|              | /codon_type=Nonsynonymous                        |
|              | /taxa=MG116025, MG116226, 4660, 4675, 4663,      |
|              | 4662, A487_1, A487_2, CIRS101, 4679, MBN17,      |
|              | 2010EL_1798, 2010EL_1786, 2010EL_1792, IDHO1726, |
|              | 4519, 4538, 4661, A488_2, A488_1,                |
|              | PRL64, MBRN14, 4122, 4488, 4600,                 |
|              | 4585, 4536, 4623, 4605, 4593,                    |
|              | 4552, 4551, 4642, 4656, 4646,                    |
|              | 4339, 4322, 4784, 6210, 6215,                    |
|              | 6214, 6212, 6196, 6191, 6195,                    |
|              | 6193, 6194, 6201, 6197, 6180,                    |
|              | A482, A483, A481, 7682, 7684,                    |
|              | 7687, 7685, 7686, V5, V109,                      |
|              | A130, A131, VC51, V212-1, MJ1485, MJ1236,        |
|              | A346_2, A346_1, B33, 1627, 1346, 1362,           |
|              | 4670, 4672, 4121, 4110, 4111,                    |
|              | 4113, A109, A383, A330, MO10, PRL5,              |
|              | A316, A245, A241, A10, GP140, RC9,               |
|              | GP143, GP152, A397, A22, GP60, N16961,           |
|              | A19, A5, A31, A27, A185,                         |

|              |                                                     |
|--------------|-----------------------------------------------------|
|              | A184, A32, A177, A29, A180,                         |
|              | A232, A231, A201, A186, A200,                       |
|              | A193, A390, GP145, GP160, GP106,                    |
|              | A152, A155, A154, A4, PRL18                         |
| SNP Position | 2669958                                             |
|              | /SNP="G->T"                                         |
|              | /codon_type=Intergenic                              |
|              | /taxa=4663, 4662, A487_1, A487_2, CIRS101,          |
|              | 4679, MBN17, 2010EL_1798, 2010EL_1786, 2010EL_1792, |
|              | IDHO1726, 4519, 4538, 4661, A488_2,                 |
|              | A488_1                                              |
| SNP Position | 2676480                                             |
|              | /SNP="T->C"                                         |
|              | /codon_type=Intergenic                              |
|              | /taxa=6210, 6215, 6214, 6212, 6196,                 |
|              | 6191, 6195, 6193, 6194, 6201,                       |
|              | 6197, 6180                                          |
| SNP Position | 2681465                                             |
|              | /SNP="G->T"                                         |
|              | /codon_type=Intergenic                              |
|              | /taxa=MJ1485, MJ1236                                |
| SNP Position | 2681482                                             |
|              | /SNP="G->A"                                         |
|              | /codon_type=Intergenic                              |
|              | /taxa=MBN17, 2010EL_1798, 2010EL_1786, 2010EL_1792, |
|              | IDHO1726, 4519, 4538                                |
| SNP Position | 2683691                                             |
|              | /SNP="G->T"                                         |
|              | /codon_type=Synonymous                              |
|              | /taxa=A5, A31, A27, A185, A184,                     |
|              | A32, A177, A29, A180, A232,                         |
|              | A231, A201, A186, A200, A193,                       |
|              | A390                                                |
| SNP Position | 2690027                                             |
|              | /SNP="T->C"                                         |
|              | /codon_type=Synonymous                              |
|              | /taxa=A152, A155, A154                              |
| SNP Position | 2690294                                             |
|              | /SNP="G->A"                                         |
|              | /codon_type=Nonsynonymous                           |
|              | /taxa=4122                                          |
| SNP Position | 2690524                                             |
|              | /SNP="G->A"                                         |
|              | /codon_type=Nonsynonymous                           |
|              | /taxa=MBN17, 2010EL_1798, 2010EL_1786, 2010EL_1792, |
|              | IDHO1726, 4519, 4538                                |
| SNP Position | 2690932                                             |
|              | /SNP="C->A"                                         |
|              | /codon_type=Nonsynonymous                           |
|              | /taxa=4784, 6210, 6215, 6214, 6212,                 |
|              | 6196, 6191, 6195, 6193, 6194,                       |
|              | 6201, 6197, 6180, A482, A483,                       |
|              | A481, 7682, 7684, 7687, 7685,                       |

|              |                                                 |
|--------------|-------------------------------------------------|
|              | 7686                                            |
| SNP Position | 2694312                                         |
|              | /strand=reverse                                 |
|              | /SNP="T->A"                                     |
|              | /codon_type=Nonsynonymous                       |
|              | /taxa=6210, 6215, 6214, 6212, 6196,             |
|              | 6191, 6195, 6193, 6194, 6201,                   |
|              | 6197, 6180                                      |
| SNP Position | 2695103                                         |
|              | /strand=reverse                                 |
|              | /SNP="A->T"                                     |
|              | /codon_type=Synonymous                          |
|              | /taxa=A245, A241                                |
| SNP Position | 2695249                                         |
|              | /strand=reverse                                 |
|              | /SNP="T->A"                                     |
|              | /codon_type=Nonsynonymous                       |
|              | /taxa=4670                                      |
| SNP Position | 2707985                                         |
|              | /SNP="C->T"                                     |
|              | /codon_type=Nonsynonymous                       |
|              | /taxa=B33, 1627, 1346, 1362                     |
| SNP Position | 2714520                                         |
|              | /SNP="G->A"                                     |
|              | /codon_type=Nonsynonymous                       |
|              | /taxa=A4                                        |
| SNP Position | 2720732                                         |
|              | /strand=reverse                                 |
|              | /SNP="C->T"                                     |
|              | /codon_type=Nonsynonymous                       |
|              | /taxa=A4                                        |
| SNP Position | 2720743                                         |
|              | /strand=reverse                                 |
|              | /SNP="G->A"                                     |
|              | /codon_type=Nonsynonymous                       |
|              | /taxa=4660, 4675, 4663, 4662, A487_1,           |
|              | A487_2, CIRS101, 4679, MBN17, 2010EL_1798,      |
|              | 2010EL_1786, 2010EL_1792, IDHO1726, 4519, 4538, |
|              | 4661, A488_2, A488_1, PRL64, MBRN14,            |
|              | 4122, 4488, 4600, 4585, 4536,                   |
|              | 4623, 4605, 4593, 4552, 4551,                   |
|              | 4642, 4656, 4646, 4339, 4322,                   |
|              | 4784, 6210, 6215, 6214, 6212,                   |
|              | 6196, 6191, 6195, 6193, 6194,                   |
|              | 6201, 6197, 6180, A482, A483,                   |
|              | A481, 7682, 7684, 7687, 7685,                   |
|              | 7686                                            |
| SNP Position | 2723292                                         |
|              | /strand=reverse                                 |
|              | /SNP="G->T"                                     |
|              | /codon_type=Synonymous                          |
|              | /taxa=4675                                      |
| SNP Position | 2726009                                         |

|              |                                                  |
|--------------|--------------------------------------------------|
|              | /SNP="T->C"                                      |
|              | /codon_type=Intergenic                           |
|              | /taxa=A4                                         |
| SNP Position | 2726186                                          |
|              | /SNP="T->G"                                      |
|              | /codon_type=Nonsynonymous                        |
|              | /taxa=4111                                       |
| SNP Position | 2729721                                          |
|              | /strand=reverse                                  |
|              | /SNP="G->A"                                      |
|              | /codon_type=Synonymous                           |
|              | /taxa=A4                                         |
| SNP Position | 2731740                                          |
|              | /strand=reverse                                  |
|              | /SNP="G->A"                                      |
|              | /codon_type=Nonsynonymous                        |
|              | /taxa=PRL64, MBRN14, 4122, 4488, 4600,           |
|              | 4585, 4536, 4623, 4605, 4593,                    |
|              | 4552, 4551, 4642, 4656, 4646,                    |
|              | 4339, 4322                                       |
| SNP Position | 2734994                                          |
|              | /SNP="A->G"                                      |
|              | /codon_type=Nonsynonymous                        |
|              | /taxa=4672, 4121, 4110, 4111, 4113               |
| SNP Position | 2737881                                          |
|              | /SNP="C->T"                                      |
|              | /codon_type=Synonymous                           |
|              | /taxa=MG116025, MG116226, 4660, 4675, 4663,      |
|              | 4662, A487_1, A487_2, CIRS101, 4679, MBN17,      |
|              | 2010EL_1798, 2010EL_1786, 2010EL_1792, IDHO1726, |
|              | 4519, 4538, 4661, A488_2, A488_1,                |
|              | PRL64, MBRN14, 4122, 4488, 4600,                 |
|              | 4585, 4536, 4623, 4605, 4593,                    |
|              | 4552, 4551, 4642, 4656, 4646,                    |
|              | 4339, 4322, 4784, 6210, 6215,                    |
|              | 6214, 6212, 6196, 6191, 6195,                    |
|              | 6193, 6194, 6201, 6197, 6180,                    |
|              | A482, A483, A481, 7682, 7684,                    |
|              | 7687, 7685, 7686, V5, V109,                      |
|              | A130, A131, VC51, V212-1, MJ1485, MJ1236,        |
|              | A346_2, A346_1, B33, 1627, 1346, 1362,           |
|              | 4670, 4672, 4121, 4110, 4111,                    |
|              | 4113, A109, A383, A330, MO10, PRL5,              |
|              | A316                                             |
| SNP Position | 2742849                                          |
|              | /strand=reverse                                  |
|              | /SNP="C->T"                                      |
|              | /codon_type=Nonsynonymous                        |
|              | /taxa=6196, 6191, 6195, 6193, 6194,              |
|              | 6201, 6197, 6180                                 |
| SNP Position | 2744560                                          |
|              | /SNP="C->T"                                      |
|              | /codon_type=Nonsynonymous                        |

|              |                                                    |
|--------------|----------------------------------------------------|
|              | /taxa=MG116025, MG116226, 4660, 4675, 4663,        |
|              | 4662, A487_1, A487_2, CIRS101, 4679, MBN17,        |
|              | 2010EL_1798, 2010EL_1786, 2010EL_1792, IDHO1726,   |
|              | 4519, 4538, 4661, A488_2, A488_1,                  |
|              | PRL64, MBRN14, 4122, 4488, 4600,                   |
|              | 4585, 4536, 4623, 4605, 4593,                      |
|              | 4552, 4551, 4642, 4656, 4646,                      |
|              | 4339, 4322, 4784, 6210, 6215,                      |
|              | 6214, 6212, 6196, 6191, 6195,                      |
|              | 6193, 6194, 6201, 6197, 6180,                      |
|              | A482, A483, A481, 7682, 7684,                      |
|              | 7687, 7685, 7686, V5, V109,                        |
|              | A130, A131, VC51, V212-1, MJ1485, MJ1236,          |
|              | A346_2, A346_1, B33, 1627, 1346, 1362,             |
|              | 4670, 4672, 4121, 4110, 4111,                      |
|              | 4113, A109, A383, A330, MO10, PRL5,                |
|              | A316, A245, A241, A10                              |
| SNP Position | 2745422                                            |
|              | /SNP="T->C"                                        |
|              | /codon_type=Nonsynonymous                          |
|              | /taxa=A4                                           |
| SNP Position | 2746863                                            |
|              | /strand=reverse                                    |
|              | /SNP="A->G"                                        |
|              | /codon_type=Nonsynonymous                          |
|              | /taxa=A4                                           |
| SNP Position | 2752386                                            |
|              | /strand=reverse                                    |
|              | /SNP="G->T"                                        |
|              | /codon_type=Nonsynonymous                          |
|              | /taxa=MBRN14                                       |
| SNP Position | 2753054                                            |
|              | /strand=reverse                                    |
|              | /SNP="A->G"                                        |
|              | /codon_type=Synonymous                             |
|              | /taxa=4121, 4110, 4111, 4113                       |
| SNP Position | 2755430                                            |
|              | /strand=reverse                                    |
|              | /SNP="T->C"                                        |
|              | /codon_type=Nonsynonymous                          |
|              | /taxa=4784, 6210, 6215, 6214, 6212,                |
|              | 6196, 6191, 6195, 6193, 6194,                      |
|              | 6201, 6197, 6180, A482, A483,                      |
|              | A481, 7682, 7684, 7687, 7685,                      |
|              | 7686                                               |
| SNP Position | 2758626                                            |
|              | /strand=reverse                                    |
|              | /SNP="C->T"                                        |
|              | /codon_type=Nonsynonymous                          |
|              | /taxa=A397, A22                                    |
| SNP Position | 2765089                                            |
|              | /SNP="G->A"                                        |
|              | /homoplasy=convergence with branch leading to GP60 |

|              |                                                     |
|--------------|-----------------------------------------------------|
|              | /codon_type=Intergenic                              |
|              | /taxa=V5                                            |
| SNP Position | 2765089                                             |
|              | /SNP="G->A"                                         |
|              | /homoplasy=convergence with branch leading to V5    |
|              | /codon_type=Intergenic                              |
|              | /taxa=GP60                                          |
| SNP Position | 2766132                                             |
|              | /strand=reverse                                     |
|              | /SNP="C->T"                                         |
|              | /codon_type=Nonsynonymous                           |
|              | /taxa=A383, A330, MO10                              |
| SNP Position | 2769659                                             |
|              | /SNP="A->G"                                         |
|              | /codon_type=Nonsynonymous                           |
|              | /taxa=MG116025, MG116226                            |
| SNP Position | 2770240                                             |
|              | /SNP="C->T"                                         |
|              | /codon_type=Nonsynonymous                           |
|              | /taxa=A201                                          |
| SNP Position | 2771085                                             |
|              | /strand=reverse                                     |
|              | /SNP="C->G"                                         |
|              | /codon_type=Synonymous                              |
|              | /taxa=PRL18                                         |
| SNP Position | 2771762                                             |
|              | /strand=reverse                                     |
|              | /SNP="G->T"                                         |
|              | /codon_type=Nonsynonymous                           |
|              | /taxa=GP143                                         |
| SNP Position | 2774333                                             |
|              | /strand=reverse                                     |
|              | /SNP="A->T"                                         |
|              | /codon_type=Nonsynonymous                           |
|              | /taxa=MBRN14                                        |
| SNP Position | 2782454                                             |
|              | /SNP="G->A"                                         |
|              | /codon_type=Nonsynonymous                           |
|              | /taxa=A4                                            |
| SNP Position | 2785500                                             |
|              | /strand=reverse                                     |
|              | /SNP="G->A"                                         |
|              | /codon_type=Synonymous                              |
|              | /taxa=A31, A27, A185, A184, A32,<br>A177, A29, A180 |
| SNP Position | 2787071                                             |
|              | /strand=reverse                                     |
|              | /SNP="G->A"                                         |
|              | /codon_type=Nonsynonymous                           |
|              | /taxa=A5                                            |
| SNP Position | 2787100                                             |
|              | /strand=reverse                                     |
|              | /SNP="G->A"                                         |

|              |                                                 |
|--------------|-------------------------------------------------|
|              | /codon_type=Synonymous                          |
|              | /taxa=A5, A31, A27, A185, A184,                 |
|              | A32, A177, A29, A180, A232,                     |
|              | A231, A201, A186, A200, A193,                   |
|              | A390                                            |
| SNP Position | 2787433                                         |
|              | /strand=reverse                                 |
|              | /SNP="T->G"                                     |
|              | /codon_type=Synonymous                          |
|              | /taxa=4675, 4663, 4662, A487_1, A487_2,         |
|              | CIRS101, 4679, MBN17, 2010EL_1798, 2010EL_1786, |
|              | 2010EL_1792, IDHO1726, 4519, 4538, 4661,        |
|              | A488_2, A488_1, PRL64, MBRN14, 4122,            |
|              | 4488, 4600, 4585, 4536, 4623,                   |
|              | 4605, 4593, 4552, 4551, 4642,                   |
|              | 4656, 4646, 4339, 4322                          |
| SNP Position | 2793257                                         |
|              | /SNP="T->C"                                     |
|              | /codon_type=Intergenic                          |
|              | /taxa=A397, A22                                 |
| SNP Position | 2794893                                         |
|              | /strand=reverse                                 |
|              | /SNP="C->T"                                     |
|              | /codon_type=Synonymous                          |
|              | /taxa=4121, 4110, 4111, 4113                    |
| SNP Position | 2795634                                         |
|              | /strand=reverse                                 |
|              | /SNP="G->T"                                     |
|              | /codon_type=Nonsynonymous                       |
|              | /taxa=B33, 1627, 1346, 1362                     |
| SNP Position | 2799942                                         |
|              | /strand=reverse                                 |
|              | /SNP="G->A"                                     |
|              | /codon_type=Nonsynonymous                       |
|              | /taxa=A390                                      |
| SNP Position | 2801769                                         |
|              | /strand=reverse                                 |
|              | /SNP="G->A"                                     |
|              | /codon_type=Nonsynonymous                       |
|              | /taxa=A245, A241                                |
| SNP Position | 2810427                                         |
|              | /SNP="A->G"                                     |
|              | /codon_type=Nonsynonymous                       |
|              | /taxa=4672                                      |
| SNP Position | 2825888                                         |
|              | /strand=reverse                                 |
|              | /SNP="G->A"                                     |
|              | /codon_type=Synonymous                          |
|              | /taxa=4661, A488_2, A488_1                      |
| SNP Position | 2837465                                         |
|              | /SNP="G->A"                                     |
|              | /codon_type=Synonymous                          |
|              | /taxa=A10                                       |



|              |                                                  |
|--------------|--------------------------------------------------|
| SNP Position | 2839044                                          |
|              | /SNP="G->A"                                      |
|              | /codon_type=Nonsynonymous                        |
|              | /taxa=MG116025, MG116226, 4660, 4675, 4663,      |
|              | 4662, A487_1, A487_2, CIRS101, 4679, MBN17,      |
|              | 2010EL_1798, 2010EL_1786, 2010EL_1792, IDHO1726, |
|              | 4519, 4538, 4661, A488_2, A488_1,                |
|              | PRL64, MBRN14, 4122, 4488, 4600,                 |
|              | 4585, 4536, 4623, 4605, 4593,                    |
|              | 4552, 4551, 4642, 4656, 4646,                    |
|              | 4339, 4322, 4784, 6210, 6215,                    |
|              | 6214, 6212, 6196, 6191, 6195,                    |
|              | 6193, 6194, 6201, 6197, 6180,                    |
|              | A482, A483, A481, 7682, 7684,                    |
|              | 7687, 7685, 7686, V5, V109,                      |
|              | A130, A131, VC51, V212-1, MJ1485, MJ1236,        |
|              | A346_2, A346_1, B33, 1627, 1346, 1362,           |
|              | 4670, 4672, 4121, 4110, 4111,                    |
|              | 4113, A109, A383, A330, MO10, PRL5,              |
|              | A316, A245, A241, A10, GP140, RC9,               |
|              | GP143, GP152, A397, A22, GP60, N16961,           |
|              | A19                                              |
| SNP Position | 2839146                                          |
|              | /SNP="A->T"                                      |
|              | /codon_type=Nonsynonymous                        |
|              | /taxa=4660, 4675, 4663, 4662, A487_1,            |
|              | A487_2, CIRS101, 4679, MBN17, 2010EL_1798,       |
|              | 2010EL_1786, 2010EL_1792, IDHO1726, 4519, 4538,  |
|              | 4661, A488_2, A488_1, PRL64, MBRN14,             |
|              | 4122, 4488, 4600, 4585, 4536,                    |
|              | 4623, 4605, 4593, 4552, 4551,                    |
|              | 4642, 4656, 4646, 4339, 4322,                    |
|              | 4784, 6210, 6215, 6214, 6212,                    |
|              | 6196, 6191, 6195, 6193, 6194,                    |
|              | 6201, 6197, 6180, A482, A483,                    |
|              | A481, 7682, 7684, 7687, 7685,                    |
|              | 7686                                             |
| SNP Position | 2842362                                          |
|              | /strand=reverse                                  |
|              | /SNP="A->G"                                      |
|              | /codon_type=Nonsynonymous                        |
|              | /taxa=M66, A6                                    |
| SNP Position | 2843849                                          |
|              | /strand=reverse                                  |
|              | /SNP="G->A"                                      |
|              | /codon_type=Synonymous                           |
|              | /taxa=A5, A31, A27, A185, A184,                  |
|              | A32, A177, A29, A180, A232,                      |
|              | A231, A201, A186, A200, A193,                    |
|              | A390                                             |
| SNP Position | 2844973                                          |
|              | /strand=reverse                                  |
|              | /SNP="C->T"                                      |

|              |                                                  |
|--------------|--------------------------------------------------|
|              | /codon_type=Nonsynonymous                        |
|              | /taxa=GP140                                      |
| SNP Position | 2846178                                          |
|              | /strand=reverse                                  |
|              | /SNP="G->A"                                      |
|              | /codon_type=Nonsynonymous                        |
|              | /taxa=A4                                         |
| SNP Position | 2850125                                          |
|              | /SNP="T->C"                                      |
|              | /codon_type=Intergenic                           |
|              | /taxa=MG116025, MG116226, 4660, 4675, 4663,      |
|              | 4662, A487_1, A487_2, CIRS101, 4679, MBN17,      |
|              | 2010EL_1798, 2010EL_1786, 2010EL_1792, IDHO1726, |
|              | 4519, 4538, 4661, A488_2, A488_1,                |
|              | PRL64, MBRN14, 4122, 4488, 4600,                 |
|              | 4585, 4536, 4623, 4605, 4593,                    |
|              | 4552, 4551, 4642, 4656, 4646,                    |
|              | 4339, 4322, 4784, 6210, 6215,                    |
|              | 6214, 6212, 6196, 6191, 6195,                    |
|              | 6193, 6194, 6201, 6197, 6180,                    |
|              | A482, A483, A481, 7682, 7684,                    |
|              | 7687, 7685, 7686, V5, V109,                      |
|              | A130, A131, VC51, V212-1, MJ1485, MJ1236,        |
|              | A346_2, A346_1, B33, 1627, 1346, 1362,           |
|              | 4670, 4672, 4121, 4110, 4111,                    |
|              | 4113, A109, A383, A330, MO10, PRL5,              |
|              | A316, A245, A241, A10, GP140, RC9,               |
|              | GP143, GP152, A397, A22, GP60, N16961,           |
|              | A19                                              |
| SNP Position | 2850249                                          |
|              | /SNP="G->A"                                      |
|              | /codon_type=Intergenic                           |
|              | /taxa=A4                                         |
| SNP Position | 2852157                                          |
|              | /SNP="G->A"                                      |
|              | /codon_type=Nonsynonymous                        |
|              | /taxa=A4                                         |
| SNP Position | 2854789                                          |
|              | /SNP="C->T"                                      |
|              | /codon_type=Synonymous                           |
|              | /taxa=MJ1485, MJ1236, A346_2, A346_1, B33,       |
|              | 1627, 1346, 1362                                 |
| SNP Position | 2855190                                          |
|              | /strand=reverse                                  |
|              | /SNP="G->T"                                      |
|              | /codon_type=Synonymous                           |
|              | /taxa=PRL18                                      |
| SNP Position | 2855677                                          |
|              | /SNP="G->A"                                      |
|              | /codon_type=Intergenic                           |
|              | /taxa=A397                                       |
| SNP Position | 2856073                                          |
|              | /SNP="G->A"                                      |

|              |                                                    |
|--------------|----------------------------------------------------|
|              | /codon_type=Synonymous                             |
|              | /taxa=7682, 7684, 7687, 7685, 7686                 |
| SNP Position | 2856499                                            |
|              | /SNP="A->C"                                        |
|              | /codon_type=Nonsynonymous                          |
|              | /taxa=GP145, GP160, GP106                          |
| SNP Position | 2857308                                            |
|              | /strand=reverse                                    |
|              | /SNP="G->T"                                        |
|              | /codon_type=Synonymous                             |
|              | /taxa=4121, 4110                                   |
| SNP Position | 2863337                                            |
|              | /strand=reverse                                    |
|              | /SNP="C->T"                                        |
|              | /codon_type=Nonsynonymous                          |
|              | /taxa=MG116226                                     |
| SNP Position | 2866781                                            |
|              | /SNP="G->A"                                        |
|              | /codon_type=Nonsynonymous                          |
|              | /taxa=GP145, GP160, GP106                          |
| SNP Position | 2866848                                            |
|              | /SNP="C->G"                                        |
|              | /codon_type=SNOP (non-stop codon to stop condon)   |
|              | /taxa=GP152                                        |
| SNP Position | 2867824                                            |
|              | /SNP="A->G"                                        |
|              | /homoplasy=convergence with branch leading to 177  |
|              | /codon_type=Nonsynonymous                          |
|              | /taxa=4536                                         |
| SNP Position | 2867824                                            |
|              | /SNP="A->G"                                        |
|              | /homoplasy=convergence with branch leading to 4536 |
|              | /codon_type=Nonsynonymous                          |
|              | /taxa=GP145, GP160, GP106                          |
| SNP Position | 2867828                                            |
|              | /SNP="T->G"                                        |
|              | /codon_type=Nonsynonymous                          |
|              | /taxa=GP145, GP160, GP106                          |
| SNP Position | 2867833                                            |
|              | /SNP="A->G"                                        |
|              | /codon_type=Nonsynonymous                          |
|              | /taxa=GP145, GP160, GP106                          |
| SNP Position | 2867834                                            |
|              | /SNP="G->T"                                        |
|              | /codon_type=Nonsynonymous                          |
|              | /taxa=GP145, GP160, GP106                          |
| SNP Position | 2867835                                            |
|              | /SNP="C->T"                                        |
|              | /codon_type=Nonsynonymous                          |
|              | /taxa=GP145, GP160, GP106                          |
| SNP Position | 2873776                                            |
|              | /SNP="C->T"                                        |
|              | /codon_type=Nonsynonymous                          |

|              |                                             |
|--------------|---------------------------------------------|
|              | /taxa=2010EL_1798, 2010EL_1786, 2010EL_1792 |
| SNP Position | 2873934                                     |
|              | /SNP="G->A"                                 |
|              | /codon_type=Intergenic                      |
|              | /taxa=A4                                    |
| SNP Position | 2874330                                     |
|              | /SNP="G->A"                                 |
|              | /codon_type=Synonymous                      |
|              | /taxa=4784                                  |
| SNP Position | 2874693                                     |
|              | /SNP="G->A"                                 |
|              | /codon_type=Intergenic                      |
|              | /taxa=4121, 4110, 4111, 4113                |
| SNP Position | 2876757                                     |
|              | /SNP="C->T"                                 |
|              | /codon_type=Intergenic                      |
|              | /taxa=PRL18                                 |
| SNP Position | 2877181                                     |
|              | /SNP="C->T"                                 |
|              | /codon_type=Intergenic                      |
|              | /taxa=A383                                  |
| SNP Position | 2878015                                     |
|              | /SNP="G->A"                                 |
|              | /codon_type=Nonsynonymous                   |
|              | /taxa=A4                                    |
| SNP Position | 2879782                                     |
|              | /SNP="A->G"                                 |
|              | /codon_type=Intergenic                      |
|              | /taxa=A5, A31, A27, A185, A184,             |
|              | A32, A177, A29, A180, A232,                 |
|              | A231, A201, A186, A200, A193,               |
|              | A390                                        |
| SNP Position | 2881053                                     |
|              | /SNP="A->G"                                 |
|              | /codon_type=Nonsynonymous                   |
|              | /taxa=MG116025                              |
| SNP Position | 2886237                                     |
|              | /SNP="G->A"                                 |
|              | /codon_type=Nonsynonymous                   |
|              | /taxa=A4                                    |
| SNP Position | 2887980                                     |
|              | /strand=reverse                             |
|              | /SNP="C->T"                                 |
|              | /codon_type=Synonymous                      |
|              | /taxa=A152, A155, A154                      |
| SNP Position | 2891838                                     |
|              | /SNP="C->A"                                 |
|              | /codon_type=Nonsynonymous                   |
|              | /taxa=RC9                                   |
| SNP Position | 2892478                                     |
|              | /SNP="T->C"                                 |
|              | /codon_type=Intergenic                      |
|              | /taxa=GP145, GP160, GP106                   |

|              |                                                  |
|--------------|--------------------------------------------------|
| SNP Position | 2894055                                          |
|              | /SNP="T->C"                                      |
|              | /codon_type=Nonsynonymous                        |
|              | /taxa=A4                                         |
| SNP Position | 2895488                                          |
|              | /SNP="T->C"                                      |
|              | /codon_type=Synonymous                           |
|              | /taxa=A4                                         |
| SNP Position | 2896540                                          |
|              | /SNP="C->T"                                      |
|              | /codon_type=Nonsynonymous                        |
|              | /taxa=A130, A131                                 |
| SNP Position | 2897911                                          |
|              | /strand=reverse                                  |
|              | /SNP="T->C"                                      |
|              | /codon_type=Nonsynonymous                        |
|              | /taxa=GP152                                      |
| SNP Position | 2897915                                          |
|              | /strand=reverse                                  |
|              | /SNP="G->A"                                      |
|              | /codon_type=Synonymous                           |
|              | /taxa=MG116025, MG116226, 4660, 4675, 4663,      |
|              | 4662, A487_1, A487_2, CIRS101, 4679, MBN17,      |
|              | 2010EL_1798, 2010EL_1786, 2010EL_1792, IDHO1726, |
|              | 4519, 4538, 4661, A488_2, A488_1,                |
|              | PRL64, MBRN14, 4122, 4488, 4600,                 |
|              | 4585, 4536, 4623, 4605, 4593,                    |
|              | 4552, 4551, 4642, 4656, 4646,                    |
|              | 4339, 4322, 4784, 6210, 6215,                    |
|              | 6214, 6212, 6196, 6191, 6195,                    |
|              | 6193, 6194, 6201, 6197, 6180,                    |
|              | A482, A483, A481, 7682, 7684,                    |
|              | 7687, 7685, 7686, V5, V109,                      |
|              | A130, A131, VC51, V212-1, MJ1485, MJ1236,        |
|              | A346_2, A346_1, B33, 1627, 1346, 1362,           |
|              | 4670, 4672, 4121, 4110, 4111,                    |
|              | 4113, A109, A383, A330, MO10                     |
| SNP Position | 2898398                                          |
|              | /strand=reverse                                  |
|              | /SNP="C->T"                                      |
|              | /codon_type=Synonymous                           |
|              | /taxa=MO10                                       |
| SNP Position | 2900100                                          |
|              | /strand=reverse                                  |
|              | /SNP="C->T"                                      |
|              | /codon_type=Nonsynonymous                        |
|              | /taxa=A397, A22                                  |
| SNP Position | 2901011                                          |
|              | /strand=reverse                                  |
|              | /SNP="G->A"                                      |
|              | /codon_type=Nonsynonymous                        |
|              | /taxa=PRL18                                      |
| SNP Position | 2906774                                          |

|              |                                                  |
|--------------|--------------------------------------------------|
|              | /SNP="C->T"                                      |
|              | /codon_type=Intergenic                           |
|              | /taxa=MG116025, MG116226, 4660, 4675, 4663,      |
|              | 4662, A487_1, A487_2, CIRS101, 4679, MBN17,      |
|              | 2010EL_1798, 2010EL_1786, 2010EL_1792, IDHO1726, |
|              | 4519, 4538, 4661, A488_2, A488_1,                |
|              | PRL64, MBRN14, 4122, 4488, 4600,                 |
|              | 4585, 4536, 4623, 4605, 4593,                    |
|              | 4552, 4551, 4642, 4656, 4646,                    |
|              | 4339, 4322, 4784, 6210, 6215,                    |
|              | 6214, 6212, 6196, 6191, 6195,                    |
|              | 6193, 6194, 6201, 6197, 6180,                    |
|              | A482, A483, A481, 7682, 7684,                    |
|              | 7687, 7685, 7686, V5, V109,                      |
|              | A130, A131, VC51, V212-1, MJ1485, MJ1236,        |
|              | A346_2, A346_1, B33, 1627, 1346, 1362,           |
|              | 4670, 4672, 4121, 4110, 4111,                    |
|              | 4113, A109, A383, A330, MO10                     |
| SNP Position | 2914537                                          |
|              | /strand=reverse                                  |
|              | /SNP="G->T"                                      |
|              | /codon_type=Nonsynonymous                        |
|              | /taxa=A5                                         |
| SNP Position | 2918983                                          |
|              | /SNP="G->A"                                      |
|              | /codon_type=Intergenic                           |
|              | /taxa=V109                                       |
| SNP Position | 2925353                                          |
|              | /SNP="A->G"                                      |
|              | /codon_type=Synonymous                           |
|              | /taxa=B33, 1627, 1346, 1362                      |
| SNP Position | 2928120                                          |
|              | /SNP="T->A"                                      |
|              | /codon_type=Intergenic                           |
|              | /taxa=MG116025, MG116226, 4660, 4675, 4663,      |
|              | 4662, A487_1, A487_2, CIRS101, 4679, MBN17,      |
|              | 2010EL_1798, 2010EL_1786, 2010EL_1792, IDHO1726, |
|              | 4519, 4538, 4661, A488_2, A488_1,                |
|              | PRL64, MBRN14, 4122, 4488, 4600,                 |
|              | 4585, 4536, 4623, 4605, 4593,                    |
|              | 4552, 4551, 4642, 4656, 4646,                    |
|              | 4339, 4322, 4784, 6210, 6215,                    |
|              | 6214, 6212, 6196, 6191, 6195,                    |
|              | 6193, 6194, 6201, 6197, 6180,                    |
|              | A482, A483, A481, 7682, 7684,                    |
|              | 7687, 7685, 7686, V5, V109,                      |
|              | A130, A131, VC51, V212-1, MJ1485, MJ1236,        |
|              | A346_2, A346_1, B33, 1627, 1346, 1362,           |
|              | 4670, 4672, 4121, 4110, 4111,                    |
|              | 4113, A109, A383, A330, MO10, PRL5,              |
|              | A316, A245, A241, A10, GP140, RC9,               |
|              | GP143, GP152, A397, A22, GP60, N16961,           |
|              | A19                                              |

|              |                                                   |
|--------------|---------------------------------------------------|
| SNP Position | 2931173                                           |
|              | /SNP="C->T"                                       |
|              | /codon_type=Intergenic                            |
|              | /taxa=B33, 1627, 1346, 1362                       |
| SNP Position | 2933328                                           |
|              | /SNP="T->G"                                       |
|              | /codon_type=Intergenic                            |
|              | /taxa=A152, A155, A154                            |
| SNP Position | 2933868                                           |
|              | /SNP="A->T"                                       |
|              | /codon_type=Intergenic                            |
|              | /taxa=PRL18                                       |
| SNP Position | 2936838                                           |
|              | /SNP="C->T"                                       |
|              | /codon_type=Intergenic                            |
|              | /taxa=A383, A330, MO10                            |
| SNP Position | 2943365                                           |
|              | /SNP="C->A"                                       |
|              | /codon_type=Synonymous                            |
|              | /taxa=4552                                        |
| SNP Position | 2956546                                           |
|              | /strand=reverse                                   |
|              | /SNP="G->A"                                       |
|              | /codon_type=Nonsynonymous                         |
|              | /taxa=RC9                                         |
| SNP Position | 2958550                                           |
|              | /SNP="T->C"                                       |
|              | /codon_type=Intergenic                            |
|              | /taxa=GP140                                       |
| SNP Position | 2959050                                           |
|              | /strand=reverse                                   |
|              | /SNP="G->T"                                       |
|              | /codon_type=Synonymous                            |
|              | /taxa=4121, 4110                                  |
| SNP Position | 2961183                                           |
|              | /SNP="A->T"                                       |
|              | /homoplasy=convergence with branch leading to 190 |
|              | /codon_type=Intergenic                            |
|              | /taxa=N16961, A19                                 |
| SNP Position | 2961183                                           |
|              | /SNP="A->T"                                       |
|              | /homoplasy=convergence with branch leading to 194 |
|              | /codon_type=Intergenic                            |
|              | /taxa=M66, A6                                     |
| SNP Position | 2968947                                           |
|              | /strand=reverse                                   |
|              | /SNP="C->A"                                       |
|              | /codon_type=Nonsynonymous                         |
|              | /taxa=7682, 7684, 7687, 7685, 7686                |
| SNP Position | 2971338                                           |
|              | /strand=reverse                                   |
|              | /SNP="C->A"                                       |
|              | /codon_type=Nonsynonymous                         |

|              |                                                                                                                                    |
|--------------|------------------------------------------------------------------------------------------------------------------------------------|
|              | /taxa=GP140                                                                                                                        |
| SNP Position | 2971712                                                                                                                            |
|              | /strand=reverse                                                                                                                    |
|              | /SNP="C->T"                                                                                                                        |
|              | /codon_type=Nonsynonymous                                                                                                          |
|              | /taxa=MO10                                                                                                                         |
| SNP Position | 2972676                                                                                                                            |
|              | /strand=reverse                                                                                                                    |
|              | /SNP="G->T"                                                                                                                        |
|              | /codon_type=Nonsynonymous                                                                                                          |
|              | /taxa=4679                                                                                                                         |
| SNP Position | 2972755                                                                                                                            |
|              | /strand=reverse                                                                                                                    |
|              | /SNP="G->A"                                                                                                                        |
|              | /homoplasy=convergence with branch leading to 129                                                                                  |
|              | /codon_type=Nonsynonymous                                                                                                          |
|              | /taxa=MJ1485                                                                                                                       |
| SNP Position | 2972755                                                                                                                            |
|              | /strand=reverse                                                                                                                    |
|              | /SNP="A->G"                                                                                                                        |
|              | /homoplasy=reversal from branch leading to 129,<br>convergence with branch leading to 136                                          |
|              | /codon_type=Nonsynonymous                                                                                                          |
|              | /taxa=GP143                                                                                                                        |
| SNP Position | 2972755                                                                                                                            |
|              | /strand=reverse                                                                                                                    |
|              | /SNP="A->G"                                                                                                                        |
|              | /homoplasy=reversal from branch leading to 129,<br>convergence with branch leading to GP143                                        |
|              | /codon_type=Nonsynonymous                                                                                                          |
|              | /taxa=A397, A22                                                                                                                    |
| SNP Position | 2972755                                                                                                                            |
|              | /strand=reverse                                                                                                                    |
|              | /SNP="G->A"                                                                                                                        |
|              | /homoplasy=convergence with branch leading to MJ1485,<br>reversed in branch leading to GP143, reversed in branch<br>leading to 136 |
|              | /codon_type=Nonsynonymous                                                                                                          |
|              | /taxa=RC9, GP143, GP152, A397, A22,<br>GP60                                                                                        |
| SNP Position | 2972815                                                                                                                            |
|              | /strand=reverse                                                                                                                    |
|              | /SNP="C->T"                                                                                                                        |
|              | /codon_type=Nonsynonymous                                                                                                          |
|              | /taxa=PRL64                                                                                                                        |
| SNP Position | 2973946                                                                                                                            |
|              | /SNP="C->T"                                                                                                                        |
|              | /codon_type=Nonsynonymous                                                                                                          |
|              | /taxa=4322                                                                                                                         |
| SNP Position | 2976685                                                                                                                            |
|              | /SNP="C->T"                                                                                                                        |
|              | /codon_type=Nonsynonymous                                                                                                          |
|              | /taxa=PRL5                                                                                                                         |



|              |                                                  |
|--------------|--------------------------------------------------|
| SNP Position | 2980806                                          |
|              | /SNP="G->A"                                      |
|              | /codon_type=Intergenic                           |
|              | /taxa=GP143                                      |
| SNP Position | 2981181                                          |
|              | /SNP="C->T"                                      |
|              | /codon_type=Synonymous                           |
|              | /taxa=A130, A131                                 |
| SNP Position | 2981196                                          |
|              | /SNP="C->T"                                      |
|              | /codon_type=Nonsynonymous                        |
|              | /taxa=A4                                         |
| SNP Position | 2983318                                          |
|              | /SNP="A->G"                                      |
|              | /codon_type=Nonsynonymous                        |
|              | /taxa=4122                                       |
| SNP Position | 2986236                                          |
|              | /SNP="C->T"                                      |
|              | /codon_type=Nonsynonymous                        |
|              | /taxa=A5, A31, A27, A185, A184,                  |
|              | A32, A177, A29, A180, A232,                      |
|              | A231, A201, A186, A200, A193,                    |
|              | A390, GP145, GP160, GP106, A152,                 |
|              | A155, A154, A4                                   |
| SNP Position | 2987678                                          |
|              | /SNP="G->A"                                      |
|              | /codon_type=Nonsynonymous                        |
|              | /taxa=A4                                         |
| SNP Position | 2988500                                          |
|              | /SNP="T->C"                                      |
|              | /codon_type=Synonymous                           |
|              | /taxa=A245, A241                                 |
| SNP Position | 2991873                                          |
|              | /SNP="C->T"                                      |
|              | /codon_type=Nonsynonymous                        |
|              | /taxa=MG116025, MG116226, 4660, 4675, 4663,      |
|              | 4662, A487_1, A487_2, CIRS101, 4679, MBN17,      |
|              | 2010EL_1798, 2010EL_1786, 2010EL_1792, IDHO1726, |
|              | 4519, 4538, 4661, A488_2, A488_1,                |
|              | PRL64, MBRN14, 4122, 4488, 4600,                 |
|              | 4585, 4536, 4623, 4605, 4593,                    |
|              | 4552, 4551, 4642, 4656, 4646,                    |
|              | 4339, 4322, 4784, 6210, 6215,                    |
|              | 6214, 6212, 6196, 6191, 6195,                    |
|              | 6193, 6194, 6201, 6197, 6180,                    |
|              | A482, A483, A481, 7682, 7684,                    |
|              | 7687, 7685, 7686, V5, V109,                      |
|              | A130, A131, VC51, V212-1, MJ1485, MJ1236,        |
|              | A346_2, A346_1, B33, 1627, 1346, 1362,           |
|              | 4670, 4672, 4121, 4110, 4111,                    |
|              | 4113, A109, A383, A330, MO10                     |
| SNP Position | 2993221                                          |
|              | /strand=reverse                                  |

|              |                                                     |
|--------------|-----------------------------------------------------|
|              | /SNP="C->T"                                         |
|              | /codon_type=Nonsynonymous                           |
|              | /taxa=B33, 1627, 1346, 1362                         |
| SNP Position | 2997028                                             |
|              | /strand=reverse                                     |
|              | /SNP="T->C"                                         |
|              | /codon_type=Nonsynonymous                           |
|              | /taxa=A4                                            |
| SNP Position | 3003252                                             |
|              | /SNP="C->T"                                         |
|              | /codon_type=Nonsynonymous                           |
|              | /taxa=A29                                           |
| SNP Position | 3003410                                             |
|              | /strand=reverse                                     |
|              | /SNP="C->A"                                         |
|              | /codon_type=Nonsynonymous                           |
|              | /taxa=4663, 4662, A487_1, A487_2, CIRS101,          |
|              | 4679, MBN17, 2010EL_1798, 2010EL_1786, 2010EL_1792, |
|              | IDHO1726, 4519, 4538                                |
| SNP Position | 3003544                                             |
|              | /strand=reverse                                     |
|              | /SNP="C->T"                                         |
|              | /codon_type=Nonsynonymous                           |
|              | /taxa=A31, A27, A185, A184, A32,                    |
|              | A177, A29, A180, A232, A231,                        |
|              | A201, A186, A200, A193, A390                        |
| SNP Position | 3005310                                             |
|              | /strand=reverse                                     |
|              | /SNP="A->G"                                         |
|              | /codon_type=Nonsynonymous                           |
|              | /taxa=GP143                                         |
| SNP Position | 3005329                                             |
|              | /strand=reverse                                     |
|              | /SNP="G->T"                                         |
|              | /codon_type=Nonsynonymous                           |
|              | /taxa=A4                                            |
| SNP Position | 3009847                                             |
|              | /SNP="T->A"                                         |
|              | /codon_type=Intergenic                              |
|              | /taxa=GP140                                         |
| SNP Position | 3013876                                             |
|              | /SNP="G->T"                                         |
|              | /codon_type=Nonsynonymous                           |
|              | /taxa=A245, A241                                    |
| SNP Position | 3014670                                             |
|              | /SNP="T->C"                                         |
|              | /codon_type=Synonymous                              |
|              | /taxa=B33, 1627, 1346, 1362                         |
| SNP Position | 3019906                                             |
|              | /strand=reverse                                     |
|              | /SNP="G->A"                                         |
|              | /codon_type=Nonsynonymous                           |
|              | /taxa=VC51, V212-1, MJ1485, MJ1236, A346_2,         |

|              |                                                       |
|--------------|-------------------------------------------------------|
|              | A346_1, B33, 1627, 1346, 1362, 4670,                  |
|              | 4672, 4121, 4110, 4111, 4113                          |
| SNP Position | 3020634                                               |
|              | /strand=reverse                                       |
|              | /SNP="T->C"                                           |
|              | /codon_type=Nonsynonymous                             |
|              | /taxa=4605, 4593, 4552, 4551                          |
| SNP Position | 3023520                                               |
|              | /SNP="G->A"                                           |
|              | /codon_type=Synonymous                                |
|              | /taxa=VC51, V212-1, MJ1485, MJ1236, A346_2,           |
|              | A346_1, B33, 1627, 1346, 1362, 4670,                  |
|              | 4672, 4121, 4110, 4111, 4113                          |
| SNP Position | 3024146                                               |
|              | /SNP="C->T"                                           |
|              | /codon_type=Nonsynonymous                             |
|              | /taxa=MG116025, MG116226, 4660, 4675, 4663,           |
|              | 4662, A487_1, A487_2, CIRS101, 4679, MBN17,           |
|              | 2010EL_1798, 2010EL_1786, 2010EL_1792, IDHO1726,      |
|              | 4519, 4538, 4661, A488_2, A488_1,                     |
|              | PRL64, MBRN14, 4122, 4488, 4600,                      |
|              | 4585, 4536, 4623, 4605, 4593,                         |
|              | 4552, 4551, 4642, 4656, 4646,                         |
|              | 4339, 4322, 4784, 6210, 6215,                         |
|              | 6214, 6212, 6196, 6191, 6195,                         |
|              | 6193, 6194, 6201, 6197, 6180,                         |
|              | A482, A483, A481, 7682, 7684,                         |
|              | 7687, 7685, 7686, V5, V109,                           |
|              | A130, A131, VC51, V212-1, MJ1485, MJ1236,             |
|              | A346_2, A346_1, B33, 1627, 1346, 1362,                |
|              | 4670, 4672, 4121, 4110, 4111, 4113                    |
| SNP Position | 3032674                                               |
|              | /SNP="G->A"                                           |
|              | /codon_type=Nonsynonymous                             |
|              | /taxa=A5, A31, A27, A185, A184,                       |
|              | A32, A177, A29, A180, A232,                           |
|              | A231, A201, A186, A200, A193,                         |
|              | A390                                                  |
| SNP Position | 3035657                                               |
|              | /SNP="T->C"                                           |
|              | /codon_type=Nonsynonymous                             |
|              | /taxa=A397                                            |
| SNP Position | 3040151                                               |
|              | /strand=reverse                                       |
|              | /SNP="C->T"                                           |
|              | /codon_type=Nonsynonymous                             |
|              | /taxa=A245, A241                                      |
| SNP Position | 3044579                                               |
|              | /strand=reverse                                       |
|              | /SNP="T->G"                                           |
|              | /codon_type=Nonsynonymous                             |
|              | /taxa=2010EL_1798, 2010EL_1786, 2010EL_1792, IDHO1726 |
| SNP Position | 3046740                                               |

|              |                                                                                                                                                   |
|--------------|---------------------------------------------------------------------------------------------------------------------------------------------------|
|              | /strand=reverse                                                                                                                                   |
|              | /SNP="C->T"                                                                                                                                       |
|              | /codon_type=Nonsynonymous                                                                                                                         |
|              | /taxa=4538                                                                                                                                        |
| SNP Position | 3050445                                                                                                                                           |
|              | /SNP="C->T"                                                                                                                                       |
|              | /codon_type=Synonymous                                                                                                                            |
|              | /taxa=A316                                                                                                                                        |
| SNP Position | 3052473                                                                                                                                           |
|              | /strand=reverse                                                                                                                                   |
|              | /SNP="C->T"                                                                                                                                       |
|              | /codon_type=Nonsynonymous                                                                                                                         |
|              | /taxa=A383                                                                                                                                        |
| SNP Position | 3054255                                                                                                                                           |
|              | /strand=reverse                                                                                                                                   |
|              | /SNP="G->A"                                                                                                                                       |
|              | /codon_type=Synonymous                                                                                                                            |
|              | /taxa=A4                                                                                                                                          |
| SNP Position | 3061594                                                                                                                                           |
|              | /SNP="A->T"                                                                                                                                       |
|              | /codon_type=Synonymous                                                                                                                            |
|              | /taxa=4488                                                                                                                                        |
| SNP Position | 3063780                                                                                                                                           |
|              | /SNP="A->G"                                                                                                                                       |
|              | /codon_type=Synonymous                                                                                                                            |
|              | /taxa=VC51                                                                                                                                        |
| SNP Position | 3064574                                                                                                                                           |
|              | /SNP="A->G"                                                                                                                                       |
|              | /codon_type=Nonsynonymous                                                                                                                         |
|              | /taxa=4121, 4110, 4111, 4113                                                                                                                      |
| SNP Position | 3069998                                                                                                                                           |
|              | /strand=reverse                                                                                                                                   |
|              | /SNP="G->A"                                                                                                                                       |
|              | /codon_type=Synonymous                                                                                                                            |
|              | /taxa=GP152, A397, A22                                                                                                                            |
| SNP Position | 3070533                                                                                                                                           |
|              | /strand=reverse                                                                                                                                   |
|              | /SNP="C->T"                                                                                                                                       |
|              | /codon_type=Nonsynonymous                                                                                                                         |
|              | /taxa=A245, A241                                                                                                                                  |
| SNP Position | 3072280                                                                                                                                           |
|              | /SNP="G->T"                                                                                                                                       |
|              | /codon_type=Nonsynonymous                                                                                                                         |
|              | /taxa=A5, A31, A27, A185, A184,<br>A32, A177, A29, A180, A232,<br>A231, A201, A186, A200, A193,<br>A390, GP145, GP160, GP106, A152,<br>A155, A154 |
| SNP Position | 3077639                                                                                                                                           |
|              | /SNP="G->T"                                                                                                                                       |
|              | /codon_type=Intergenic                                                                                                                            |
|              | /taxa=M66, A6                                                                                                                                     |
| SNP Position | 3080140                                                                                                                                           |

|              |                                                  |
|--------------|--------------------------------------------------|
|              | /SNP="C->T"                                      |
|              | /codon_type=Synonymous                           |
|              | /taxa=A245, A241                                 |
| SNP Position | 3088953                                          |
|              | /SNP="T->G"                                      |
|              | /codon_type=Nonsynonymous                        |
|              | /taxa=1627                                       |
| SNP Position | 3090462                                          |
|              | /SNP="C->T"                                      |
|              | /codon_type=Nonsynonymous                        |
|              | /taxa=A4                                         |
| SNP Position | 3092526                                          |
|              | /SNP="A->G"                                      |
|              | /codon_type=Nonsynonymous                        |
|              | /taxa=A397                                       |
| SNP Position | 3104942                                          |
|              | /SNP="G->A"                                      |
|              | /codon_type=Nonsynonymous                        |
|              | /taxa=4675, 4663, 4662, A487_1, A487_2,          |
|              | CIRS101, 4679, MBN17, 2010EL_1798, 2010EL_1786,  |
|              | 2010EL_1792, IDHO1726, 4519, 4538, 4661,         |
|              | A488_2, A488_1, PRL64, MBRN14, 4122,             |
|              | 4488, 4600, 4585, 4536, 4623,                    |
|              | 4605, 4593, 4552, 4551, 4642,                    |
|              | 4656, 4646, 4339, 4322                           |
| SNP Position | 3107874                                          |
|              | /SNP="A->T"                                      |
|              | /codon_type=Nonsynonymous                        |
|              | /taxa=GP152                                      |
| SNP Position | 3110089                                          |
|              | /SNP="C->T"                                      |
|              | /codon_type=SNOP (non-stop codon to stop condon) |
|              | /taxa=A245, A241                                 |
| SNP Position | 3117174                                          |
|              | /strand=reverse                                  |
|              | /SNP="T->C"                                      |
|              | /codon_type=Nonsynonymous                        |
|              | /taxa=A4                                         |
| SNP Position | 3117188                                          |
|              | /strand=reverse                                  |
|              | /SNP="C->T"                                      |
|              | /codon_type=Nonsynonymous                        |
|              | /taxa=4339                                       |
| SNP Position | 3122273                                          |
|              | /SNP="T->G"                                      |
|              | /codon_type=Nonsynonymous                        |
|              | /taxa=MBRN14, 4122, 4488, 4600, 4585,            |
|              | 4536, 4623, 4605, 4593, 4552,                    |
|              | 4551, 4642, 4656, 4646, 4339, 4322               |
| SNP Position | 3124841                                          |
|              | /SNP="C->T"                                      |
|              | /codon_type=Nonsynonymous                        |
|              | /taxa=MJ1485, MJ1236                             |

|              |                                                     |
|--------------|-----------------------------------------------------|
| SNP Position | 3127054                                             |
|              | /SNP="T->A"                                         |
|              | /codon_type=Nonsynonymous                           |
|              | /taxa=PRL5                                          |
| SNP Position | 3134223                                             |
|              | /strand=reverse                                     |
|              | /SNP="A->G"                                         |
|              | /codon_type=Nonsynonymous                           |
|              | /taxa=A4                                            |
| SNP Position | 3135388                                             |
|              | /strand=reverse                                     |
|              | /SNP="C->T"                                         |
|              | /codon_type=Nonsynonymous                           |
|              | /taxa=RC9                                           |
| SNP Position | 3138378                                             |
|              | /strand=reverse                                     |
|              | /SNP="C->T"                                         |
|              | /codon_type=Synonymous                              |
|              | /taxa=RC9                                           |
| SNP Position | 3140106                                             |
|              | /strand=reverse                                     |
|              | /SNP="A->G"                                         |
|              | /codon_type=Synonymous                              |
|              | /taxa=A152, A155, A154                              |
| SNP Position | 3143055                                             |
|              | /SNP="C->A"                                         |
|              | /codon_type=Intergenic                              |
|              | /taxa=4672                                          |
| SNP Position | 3145181                                             |
|              | /SNP="A->G"                                         |
|              | /codon_type=Synonymous                              |
|              | /taxa=A152, A155, A154                              |
| SNP Position | 3159854                                             |
|              | /SNP="T->C"                                         |
|              | /codon_type=Nonsynonymous                           |
|              | /taxa=A31, A27, A185, A184, A32,                    |
|              | A177, A29, A180, A232, A231,                        |
|              | A201, A186, A200, A193, A390                        |
| SNP Position | 3161859                                             |
|              | /strand=reverse                                     |
|              | /SNP="C->T"                                         |
|              | /codon_type=Nonsynonymous                           |
|              | /taxa=4661, A488_2, A488_1                          |
| SNP Position | 3164546                                             |
|              | /SNP="G->T"                                         |
|              | /codon_type=Intergenic                              |
|              | /taxa=MBN17, 2010EL_1798, 2010EL_1786, 2010EL_1792, |
|              | IDH01726, 4519, 4538                                |
| SNP Position | 3167881                                             |
|              | /SNP="A->G"                                         |
|              | /codon_type=Nonsynonymous                           |
|              | /taxa=4672                                          |
| SNP Position | 3175627                                             |

|              |                                                         |
|--------------|---------------------------------------------------------|
|              | /SNP="C->T"                                             |
|              | /codon_type=Intergenic                                  |
|              | /taxa=4672, 4121, 4110, 4111, 4113                      |
| SNP Position | 3177110                                                 |
|              | /SNP="G->A"                                             |
|              | /codon_type=Nonsynonymous                               |
|              | /taxa=A397                                              |
| SNP Position | 3180574                                                 |
|              | /SNP="T->C"                                             |
|              | /codon_type=Synonymous                                  |
|              | /taxa=GP143                                             |
| SNP Position | 3181762                                                 |
|              | /SNP="C->T"                                             |
|              | /codon_type=Intergenic                                  |
|              | /taxa=A241                                              |
| SNP Position | 3183602                                                 |
|              | /strand=reverse                                         |
|              | /SNP="T->G"                                             |
|              | /codon_type=Nonsynonymous                               |
|              | /taxa=A19                                               |
| SNP Position | 3186024                                                 |
|              | /SNP="C->T"                                             |
|              | /codon_type=Synonymous                                  |
|              | /taxa=A4                                                |
| SNP Position | 3189227                                                 |
|              | /strand=reverse                                         |
|              | /SNP="C->A"                                             |
|              | /codon_type=Nonsynonymous                               |
|              | /taxa=6196, 6191, 6195, 6193, 6194,<br>6201, 6197, 6180 |
| SNP Position | 3189446                                                 |
|              | /strand=reverse                                         |
|              | /SNP="C->T"                                             |
|              | /codon_type=Nonsynonymous                               |
|              | /taxa=PRL18                                             |
| SNP Position | 3193335                                                 |
|              | /SNP="G->A"                                             |
|              | /codon_type=Intergenic                                  |
|              | /taxa=4111                                              |
| SNP Position | 3197425                                                 |
|              | /strand=reverse                                         |
|              | /SNP="C->T"                                             |
|              | /codon_type=Nonsynonymous                               |
|              | /taxa=4672                                              |
| SNP Position | 3199636                                                 |
|              | /SNP="G->A"                                             |
|              | /codon_type=Synonymous                                  |
|              | /taxa=A397, A22                                         |
| SNP Position | 3200052                                                 |
|              | /SNP="A->G"                                             |
|              | /codon_type=Nonsynonymous                               |
|              | /taxa=A397, A22                                         |
| SNP Position | 3200124                                                 |

|              |                                                  |
|--------------|--------------------------------------------------|
|              | /SNP="C->T"                                      |
|              | /codon_type=Nonsynonymous                        |
|              | /taxa=MG116025, MG116226, 4660, 4675, 4663,      |
|              | 4662, A487_1, A487_2, CIRS101, 4679, MBN17,      |
|              | 2010EL_1798, 2010EL_1786, 2010EL_1792, IDHO1726, |
|              | 4519, 4538, 4661, A488_2, A488_1,                |
|              | PRL64, MBRN14, 4122, 4488, 4600,                 |
|              | 4585, 4536, 4623, 4605, 4593,                    |
|              | 4552, 4551, 4642, 4656, 4646,                    |
|              | 4339, 4322, 4784, 6210, 6215,                    |
|              | 6214, 6212, 6196, 6191, 6195,                    |
|              | 6193, 6194, 6201, 6197, 6180,                    |
|              | A482, A483, A481, 7682, 7684,                    |
|              | 7687, 7685, 7686, V5, V109,                      |
|              | A130, A131, VC51, V212-1, MJ1485, MJ1236,        |
|              | A346_2, A346_1, B33, 1627, 1346, 1362,           |
|              | 4670, 4672, 4121, 4110, 4111,                    |
|              | 4113, A109, A383, A330, MO10, PRL5,              |
|              | A316, A245, A241, A10, GP140, RC9,               |
|              | GP143, GP152, A397, A22, GP60, N16961,           |
|              | A19, A5, A31, A27, A185,                         |
|              | A184, A32, A177, A29, A180,                      |
|              | A232, A231, A201, A186, A200,                    |
|              | A193, A390, GP145, GP160, GP106,                 |
|              | A152, A155, A154, A4, PRL18                      |
| SNP Position | 3208354                                          |
|              | /SNP="T->C"                                      |
|              | /codon_type=Intergenic                           |
|              | /taxa=MG116025, MG116226, 4660, 4675, 4663,      |
|              | 4662, A487_1, A487_2, CIRS101, 4679, MBN17,      |
|              | 2010EL_1798, 2010EL_1786, 2010EL_1792, IDHO1726, |
|              | 4519, 4538, 4661, A488_2, A488_1,                |
|              | PRL64, MBRN14, 4122, 4488, 4600,                 |
|              | 4585, 4536, 4623, 4605, 4593,                    |
|              | 4552, 4551, 4642, 4656, 4646,                    |
|              | 4339, 4322, 4784, 6210, 6215,                    |
|              | 6214, 6212, 6196, 6191, 6195,                    |
|              | 6193, 6194, 6201, 6197, 6180,                    |
|              | A482, A483, A481, 7682, 7684,                    |
|              | 7687, 7685, 7686, V5, V109,                      |
|              | A130, A131, VC51, V212-1, MJ1485, MJ1236,        |
|              | A346_2, A346_1, B33, 1627, 1346, 1362,           |
|              | 4670, 4672, 4121, 4110, 4111,                    |
|              | 4113, A109, A383, A330, MO10, PRL5,              |
|              | A316, A245, A241, A10, GP140, RC9,               |
|              | GP143, GP152, A397, A22, GP60, N16961,           |
|              | A19                                              |
| SNP Position | 3209636                                          |
|              | /SNP="C->T"                                      |
|              | /codon_type=Intergenic                           |
|              | /taxa=4784, 6210, 6215, 6214, 6212,              |
|              | 6196, 6191, 6195, 6193, 6194,                    |
|              | 6201, 6197, 6180, A482, A483,                    |



|              |                                     |
|--------------|-------------------------------------|
|              | A481, 7682, 7684, 7687, 7685,       |
|              | 7686                                |
| SNP Position | 3209648                             |
|              | /SNP="A->C"                         |
|              | /codon_type=Intergenic              |
|              | /taxa=4784, 6210, 6215, 6214, 6212, |
|              | 6196, 6191, 6195, 6193, 6194,       |
|              | 6201, 6197, 6180, A482, A483,       |
|              | A481, 7682, 7684, 7687, 7685,       |
|              | 7686                                |
| SNP Position | 3209651                             |
|              | /SNP="T->C"                         |
|              | /codon_type=Intergenic              |
|              | /taxa=4784, 6210, 6215, 6214, 6212, |
|              | 6196, 6191, 6195, 6193, 6194,       |
|              | 6201, 6197, 6180, A482, A483,       |
|              | A481, 7682, 7684, 7687, 7685,       |
|              | 7686                                |
| SNP Position | 3209969                             |
|              | /SNP="C->A"                         |
|              | /codon_type=Synonymous              |
|              | /taxa=6210, 6215, 6214, 6212        |
| SNP Position | 3212132                             |
|              | /SNP="C->T"                         |
|              | /codon_type=Nonsynonymous           |
|              | /taxa=4122                          |
| SNP Position | 3214195                             |
|              | /strand=reverse                     |
|              | /SNP="C->T"                         |
|              | /codon_type=Synonymous              |
|              | /taxa=4672                          |
| SNP Position | 3215466                             |
|              | /SNP="C->T"                         |
|              | /codon_type=Intergenic              |
|              | /taxa=A4                            |
| SNP Position | 3219004                             |
|              | /SNP="C->T"                         |
|              | /codon_type=Intergenic              |
|              | /taxa=GP152                         |
| SNP Position | 3222072                             |
|              | /SNP="A->G"                         |
|              | /codon_type=Nonsynonymous           |
|              | /taxa=A5, A31, A27, A185, A184,     |
|              | A32, A177, A29, A180, A232,         |
|              | A231, A201, A186, A200, A193,       |
|              | A390                                |
| SNP Position | 3226636                             |
|              | /strand=reverse                     |
|              | /SNP="A->G"                         |
|              | /codon_type=Nonsynonymous           |
|              | /taxa=A4                            |
| SNP Position | 3226737                             |
|              | /strand=reverse                     |

|              |                                                  |
|--------------|--------------------------------------------------|
|              | /SNP="C->T"                                      |
|              | /codon_type=Nonsynonymous                        |
|              | /taxa=A4                                         |
| SNP Position | 3227197                                          |
|              | /strand=reverse                                  |
|              | /SNP="A->G"                                      |
|              | /codon_type=Nonsynonymous                        |
|              | /taxa=MBRN14, 4122, 4488, 4600, 4585,            |
|              | 4536, 4623, 4605, 4593, 4552,                    |
|              | 4551, 4642, 4656, 4646, 4339, 4322               |
| SNP Position | 3227892                                          |
|              | /strand=reverse                                  |
|              | /SNP="G->A"                                      |
|              | /codon_type=Synonymous                           |
|              | /taxa=A31, A27, A185, A184, A32,                 |
|              | A177, A29, A180, A232, A231,                     |
|              | A201, A186, A200, A193, A390                     |
| SNP Position | 3229072                                          |
|              | /SNP="C->T"                                      |
|              | /codon_type=Synonymous                           |
|              | /taxa=MG116025, MG116226, 4660, 4675, 4663,      |
|              | 4662, A487_1, A487_2, CIRS101, 4679, MBN17,      |
|              | 2010EL_1798, 2010EL_1786, 2010EL_1792, IDHO1726, |
|              | 4519, 4538, 4661, A488_2, A488_1,                |
|              | PRL64, MBRN14, 4122, 4488, 4600,                 |
|              | 4585, 4536, 4623, 4605, 4593,                    |
|              | 4552, 4551, 4642, 4656, 4646,                    |
|              | 4339, 4322, 4784, 6210, 6215,                    |
|              | 6214, 6212, 6196, 6191, 6195,                    |
|              | 6193, 6194, 6201, 6197, 6180,                    |
|              | A482, A483, A481, 7682, 7684,                    |
|              | 7687, 7685, 7686, V5, V109,                      |
|              | A130, A131, VC51, V212-1, MJ1485, MJ1236,        |
|              | A346_2, A346_1, B33, 1627, 1346, 1362,           |
|              | 4670, 4672, 4121, 4110, 4111,                    |
|              | 4113, A109, A383, A330, MO10, PRL5,              |
|              | A316, A245, A241, A10, GP140, RC9,               |
|              | GP143, GP152, A397, A22, GP60, N16961,           |
|              | A19, A5, A31, A27, A185,                         |
|              | A184, A32, A177, A29, A180,                      |
|              | A232, A231, A201, A186, A200,                    |
|              | A193, A390, GP145, GP160, GP106,                 |
|              | A152, A155, A154, A4, PRL18                      |
| SNP Position | 3229910                                          |
|              | /SNP="G->T"                                      |
|              | /codon_type=Nonsynonymous                        |
|              | /taxa=6210, 6215, 6214, 6212, 6196,              |
|              | 6191, 6195, 6193, 6194, 6201,                    |
|              | 6197, 6180                                       |
| SNP Position | 3231581                                          |
|              | /strand=reverse                                  |
|              | /SNP="G->T"                                      |
|              | /codon_type=Nonsynonymous                        |

|              |                                                  |
|--------------|--------------------------------------------------|
|              | /taxa=MG116025, MG116226, 4660, 4675, 4663,      |
|              | 4662, A487_1, A487_2, CIRS101, 4679, MBN17,      |
|              | 2010EL_1798, 2010EL_1786, 2010EL_1792, IDHO1726, |
|              | 4519, 4538, 4661, A488_2, A488_1,                |
|              | PRL64, MBRN14, 4122, 4488, 4600,                 |
|              | 4585, 4536, 4623, 4605, 4593,                    |
|              | 4552, 4551, 4642, 4656, 4646,                    |
|              | 4339, 4322, 4784, 6210, 6215,                    |
|              | 6214, 6212, 6196, 6191, 6195,                    |
|              | 6193, 6194, 6201, 6197, 6180,                    |
|              | A482, A483, A481, 7682, 7684,                    |
|              | 7687, 7685, 7686, V5, V109,                      |
|              | A130, A131, VC51, V212-1, MJ1485, MJ1236,        |
|              | A346_2, A346_1, B33, 1627, 1346, 1362,           |
|              | 4670, 4672, 4121, 4110, 4111,                    |
|              | 4113, A109, A383, A330, MO10, PRL5,              |
|              | A316, A245, A241, A10, GP140, RC9,               |
|              | GP143, GP152, A397, A22, GP60, N16961,           |
|              | A19                                              |
| SNP Position | 3232005                                          |
|              | /strand=reverse                                  |
|              | /SNP="G->A"                                      |
|              | /codon_type=Synonymous                           |
|              | /taxa=A316                                       |
| SNP Position | 3234423                                          |
|              | /SNP="T->C"                                      |
|              | /codon_type=Intergenic                           |
|              | /taxa=CIRS101                                    |
| SNP Position | 3241941                                          |
|              | /strand=reverse                                  |
|              | /SNP="C->T"                                      |
|              | /codon_type=Nonsynonymous                        |
|              | /taxa=A5, A31, A27, A185, A184,                  |
|              | A32, A177, A29, A180, A232,                      |
|              | A231, A201, A186, A200, A193,                    |
|              | A390                                             |
| SNP Position | 3247022                                          |
|              | /SNP="C->T"                                      |
|              | /codon_type=Synonymous                           |
|              | /taxa=A31, A27, A185, A184, A32,                 |
|              | A177, A29, A180, A232, A231,                     |
|              | A201, A186, A200, A193, A390                     |
| SNP Position | 3248361                                          |
|              | /SNP="C->T"                                      |
|              | /codon_type=SNOP (non-stop codon to stop condon) |
|              | /taxa=7682                                       |
| SNP Position | 3250068                                          |
|              | /SNP="C->A"                                      |
|              | /codon_type=Nonsynonymous                        |
|              | /taxa=A31                                        |
| SNP Position | 3253125                                          |
|              | /SNP="C->T"                                      |
|              | /codon_type=Nonsynonymous                        |

|              |                                     |
|--------------|-------------------------------------|
|              | /taxa=A155, A154                    |
| SNP Position | 3256783                             |
|              | /SNP="G->A"                         |
|              | /codon_type=Intergenic              |
|              | /taxa=4661, A488_2, A488_1          |
| SNP Position | 3258810                             |
|              | /SNP="A->G"                         |
|              | /codon_type=Intergenic              |
|              | /taxa=V212-1                        |
| SNP Position | 3260202                             |
|              | /SNP="G->A"                         |
|              | /codon_type=Intergenic              |
|              | /taxa=PRL18                         |
| SNP Position | 3277228                             |
|              | /SNP="T->G"                         |
|              | /codon_type=Intergenic              |
|              | /taxa=M66, A6                       |
| SNP Position | 3278097                             |
|              | /SNP="C->T"                         |
|              | /codon_type=Intergenic              |
|              | /taxa=A152, A155, A154              |
| SNP Position | 3279270                             |
|              | /SNP="T->C"                         |
|              | /codon_type=Intergenic              |
|              | /taxa=A383                          |
| SNP Position | 3281628                             |
|              | /SNP="T->A"                         |
|              | /codon_type=Synonymous              |
|              | /taxa=A130, A131                    |
| SNP Position | 3284515                             |
|              | /SNP="C->T"                         |
|              | /codon_type=Intergenic              |
|              | /taxa=A5                            |
| SNP Position | 3290147                             |
|              | /SNP="T->C"                         |
|              | /codon_type=Synonymous              |
|              | /taxa=GP152, A397, A22              |
| SNP Position | 3292473                             |
|              | /SNP="C->A"                         |
|              | /codon_type=Intergenic              |
|              | /taxa=PRL5                          |
| SNP Position | 3295053                             |
|              | /SNP="G->C"                         |
|              | /codon_type=Intergenic              |
|              | /taxa=4122, 4488, 4600, 4585, 4536, |
|              | 4623, 4605, 4593, 4552, 4551        |
| SNP Position | 3295055                             |
|              | /SNP="T->A"                         |
|              | /codon_type=Intergenic              |
|              | /taxa=4122, 4488, 4600, 4585, 4536, |
|              | 4623, 4605, 4593, 4552, 4551        |
| SNP Position | 3295064                             |
|              | /SNP="A->G"                         |

|              |                                                  |
|--------------|--------------------------------------------------|
|              | /codon_type=Intergenic                           |
|              | /taxa=4122, 4488, 4600, 4585, 4536,              |
|              | 4623, 4605, 4593, 4552, 4551                     |
| SNP Position | 3298444                                          |
|              | /SNP="G->A"                                      |
|              | /codon_type=Nonsynonymous                        |
|              | /taxa=M66, A6                                    |
| SNP Position | 3298445                                          |
|              | /SNP="T->C"                                      |
|              | /codon_type=Nonsynonymous                        |
|              | /taxa=M66, A6                                    |
| SNP Position | 3298458                                          |
|              | /SNP="C->T"                                      |
|              | /codon_type=Synonymous                           |
|              | /taxa=M66, A6                                    |
| SNP Position | 3299293                                          |
|              | /SNP="G->A"                                      |
|              | /codon_type=Intergenic                           |
|              | /taxa=A152, A155, A154                           |
| SNP Position | 3299294                                          |
|              | /SNP="T->G"                                      |
|              | /codon_type=Intergenic                           |
|              | /taxa=A152, A155, A154                           |
| SNP Position | 3299298                                          |
|              | /SNP="G->A"                                      |
|              | /codon_type=Intergenic                           |
|              | /taxa=A152, A155, A154                           |
| SNP Position | 3299300                                          |
|              | /SNP="A->T"                                      |
|              | /codon_type=Intergenic                           |
|              | /taxa=A152, A155, A154                           |
| SNP Position | 3303075                                          |
|              | /SNP="T->C"                                      |
|              | /codon_type=Intergenic                           |
|              | /taxa=A4                                         |
| SNP Position | 3304277                                          |
|              | /SNP="C->T"                                      |
|              | /codon_type=Intergenic                           |
|              | /taxa=MG116025, MG116226, 4660, 4675, 4663,      |
|              | 4662, A487_1, A487_2, CIRS101, 4679, MBN17,      |
|              | 2010EL_1798, 2010EL_1786, 2010EL_1792, IDHO1726, |
|              | 4519, 4538, 4661, A488_2, A488_1,                |
|              | PRL64, MBRN14, 4122, 4488, 4600,                 |
|              | 4585, 4536, 4623, 4605, 4593,                    |
|              | 4552, 4551, 4642, 4656, 4646,                    |
|              | 4339, 4322, 4784, 6210, 6215,                    |
|              | 6214, 6212, 6196, 6191, 6195,                    |
|              | 6193, 6194, 6201, 6197, 6180,                    |
|              | A482, A483, A481, 7682, 7684,                    |
|              | 7687, 7685, 7686, V5, V109,                      |
|              | A130, A131, VC51, V212-1, MJ1485, MJ1236,        |
|              | A346_2, A346_1, B33, 1627, 1346, 1362,           |
|              | 4670, 4672, 4121, 4110, 4111,                    |

|              |                                     |
|--------------|-------------------------------------|
|              | 4113, A109, A383, A330, MO10, PRL5, |
|              | A316, A245, A241, A10, GP140        |
| SNP Position | 3306649                             |
|              | /SNP="G->A"                         |
|              | /codon_type=Intergenic              |
|              | /taxa=N16961, A19                   |
| SNP Position | 3310864                             |
|              | /strand=reverse                     |
|              | /SNP="T->G"                         |
|              | /codon_type=Synonymous              |
|              | /taxa=M66, A6                       |
| SNP Position | 3311351                             |
|              | /strand=reverse                     |
|              | /SNP="T->C"                         |
|              | /codon_type=Nonsynonymous           |
|              | /taxa=M66, A6                       |
| SNP Position | 3311368                             |
|              | /strand=reverse                     |
|              | /SNP="A->G"                         |
|              | /codon_type=Nonsynonymous           |
|              | /taxa=M66, A6                       |
| SNP Position | 3312467                             |
|              | /strand=reverse                     |
|              | /SNP="A->G"                         |
|              | /codon_type=Nonsynonymous           |
|              | /taxa=M66, A6                       |
| SNP Position | 3315923                             |
|              | /SNP="C->A"                         |
|              | /codon_type=Intergenic              |
|              | /taxa=4488                          |
| SNP Position | 3315930                             |
|              | /SNP="C->T"                         |
|              | /codon_type=Intergenic              |
|              | /taxa=4488                          |
| SNP Position | 3315931                             |
|              | /SNP="T->G"                         |
|              | /codon_type=Intergenic              |
|              | /taxa=4488                          |
| SNP Position | 3315932                             |
|              | /SNP="G->C"                         |
|              | /codon_type=Intergenic              |
|              | /taxa=4488                          |
| SNP Position | 3321051                             |
|              | /SNP="A->C"                         |
|              | /codon_type=Intergenic              |
|              | /taxa=M66, A6                       |
| SNP Position | 3323907                             |
|              | /SNP="C->T"                         |
|              | /codon_type=Intergenic              |
|              | /taxa=4670                          |
| SNP Position | 3325016                             |
|              | /SNP="C->T"                         |
|              | /codon_type=Intergenic              |

|              |                        |
|--------------|------------------------|
|              | /taxa=M66, A6          |
| SNP Position | 3325130                |
|              | /SNP="T->C"            |
|              | /codon_type=Intergenic |
|              | /taxa=M66, A6          |
| SNP Position | 3325202                |
|              | /SNP="C->G"            |
|              | /codon_type=Intergenic |
|              | /taxa=M66, A6          |
| SNP Position | 3325244                |
|              | /SNP="A->C"            |
|              | /codon_type=Intergenic |
|              | /taxa=M66, A6          |
| SNP Position | 3325606                |
|              | /SNP="A->G"            |
|              | /codon_type=Intergenic |
|              | /taxa=M66, A6          |
| SNP Position | 3325675                |
|              | /SNP="T->C"            |
|              | /codon_type=Intergenic |
|              | /taxa=M66, A6          |
| SNP Position | 3325702                |
|              | /SNP="T->C"            |
|              | /codon_type=Intergenic |
|              | /taxa=M66, A6          |
| SNP Position | 3325723                |
|              | /SNP="G->A"            |
|              | /codon_type=Intergenic |
|              | /taxa=M66, A6          |
| SNP Position | 3325757                |
|              | /SNP="C->T"            |
|              | /codon_type=Intergenic |
|              | /taxa=M66, A6          |
| SNP Position | 3325813                |
|              | /SNP="G->A"            |
|              | /codon_type=Intergenic |
|              | /taxa=M66, A6          |
| SNP Position | 3325849                |
|              | /SNP="A->G"            |
|              | /codon_type=Intergenic |
|              | /taxa=M66, A6          |
| SNP Position | 3325854                |
|              | /SNP="A->G"            |
|              | /codon_type=Intergenic |
|              | /taxa=M66, A6          |
| SNP Position | 3328638                |
|              | /SNP="A->T"            |
|              | /codon_type=Intergenic |
|              | /taxa=MG116226         |
| SNP Position | 3328644                |
|              | /SNP="T->C"            |
|              | /codon_type=Intergenic |
|              | /taxa=MG116226         |

|              |                                                                                                  |
|--------------|--------------------------------------------------------------------------------------------------|
| SNP Position | 3328657                                                                                          |
|              | /SNP="A->G"                                                                                      |
|              | /codon_type=Intergenic                                                                           |
|              | /taxa=MG116226                                                                                   |
| SNP Position | 3328682                                                                                          |
|              | /SNP="G->A"                                                                                      |
|              | /codon_type=Intergenic                                                                           |
|              | /taxa=MG116226                                                                                   |
| SNP Position | 3328830                                                                                          |
|              | /SNP="G->A"                                                                                      |
|              | /codon_type=Intergenic                                                                           |
|              | /taxa=M66, A6                                                                                    |
| SNP Position | 3329542                                                                                          |
|              | /SNP="G->A"                                                                                      |
|              | /codon_type=Intergenic                                                                           |
|              | /taxa=M66, A6                                                                                    |
| SNP Position | 3329577                                                                                          |
|              | /SNP="C->T"                                                                                      |
|              | /codon_type=Intergenic                                                                           |
|              | /taxa=M66, A6                                                                                    |
| SNP Position | 3338344                                                                                          |
|              | /SNP="A->G"                                                                                      |
|              | /codon_type=Intergenic                                                                           |
|              | /taxa=A4                                                                                         |
| SNP Position | 3339340                                                                                          |
|              | /SNP="C->T"                                                                                      |
|              | /codon_type=Nonsynonymous                                                                        |
|              | /taxa=M66, A6                                                                                    |
| SNP Position | 3340813                                                                                          |
|              | /SNP="G->A"                                                                                      |
|              | /codon_type=Intergenic                                                                           |
|              | /taxa=A31, A27, A185, A184, A32,<br>A177, A29, A180, A232, A231,<br>A201, A186, A200, A193, A390 |
| SNP Position | 3343982                                                                                          |
|              | /SNP="A->G"                                                                                      |
|              | /codon_type=Synonymous                                                                           |
|              | /taxa=M66, A6                                                                                    |
| SNP Position | 3343983                                                                                          |
|              | /SNP="A->C"                                                                                      |
|              | /codon_type=Nonsynonymous                                                                        |
|              | /taxa=M66, A6                                                                                    |
| SNP Position | 3343985                                                                                          |
|              | /SNP="C->T"                                                                                      |
|              | /codon_type=Nonsynonymous                                                                        |
|              | /taxa=M66, A6                                                                                    |
| SNP Position | 3344009                                                                                          |
|              | /SNP="A->C"                                                                                      |
|              | /codon_type=Nonsynonymous                                                                        |
|              | /taxa=M66, A6                                                                                    |
| SNP Position | 3344082                                                                                          |
|              | /SNP="G->A"                                                                                      |
|              | /codon_type=Nonsynonymous                                                                        |



|              |                                                  |
|--------------|--------------------------------------------------|
|              | /taxa=M66, A6                                    |
| SNP Position | 3344087                                          |
|              | /SNP="A->T"                                      |
|              | /codon_type=Synonymous                           |
|              | /taxa=M66, A6                                    |
| SNP Position | 3344090                                          |
|              | /SNP="T->C"                                      |
|              | /codon_type=Synonymous                           |
|              | /taxa=M66, A6                                    |
| SNP Position | 3352745                                          |
|              | /SNP="C->T"                                      |
|              | /codon_type=Nonsynonymous                        |
|              | /taxa=A4                                         |
| SNP Position | 3353357                                          |
|              | /SNP="C->T"                                      |
|              | /codon_type=Synonymous                           |
|              | /taxa=M66, A6                                    |
| SNP Position | 3353422                                          |
|              | /SNP="C->A"                                      |
|              | /codon_type=Nonsynonymous                        |
|              | /taxa=M66, A6                                    |
| SNP Position | 3353525                                          |
|              | /SNP="G->T"                                      |
|              | /codon_type=Nonsynonymous                        |
|              | /taxa=M66, A6                                    |
| SNP Position | 3356283                                          |
|              | /SNP="A->C"                                      |
|              | /codon_type=Intergenic                           |
|              | /taxa=4121, 4110                                 |
| SNP Position | 3359295                                          |
|              | /SNP="G->T"                                      |
|              | /homoplasy=convergence with branch leading to A4 |
|              | /codon_type=Nonsynonymous                        |
|              | /taxa=6210, 6215, 6214, 6212, 6196,              |
|              | 6191, 6195, 6193, 6194, 6201,                    |
|              | 6197, 6180                                       |
| SNP Position | 3359295                                          |
|              | /SNP="G->T"                                      |
|              | /homoplasy=convergence with branch leading to 78 |
|              | /codon_type=Nonsynonymous                        |
|              | /taxa=A4                                         |
| SNP Position | 3362647                                          |
|              | /SNP="T->G"                                      |
|              | /codon_type=Nonsynonymous                        |
|              | /taxa=4122, 4488, 4600, 4585, 4536,              |
|              | 4623, 4605, 4593, 4552, 4551                     |
| SNP Position | 3367148                                          |
|              | /SNP="T->A"                                      |
|              | /codon_type=Intergenic                           |
|              | /taxa=PRL5                                       |
| SNP Position | 3369076                                          |
|              | /SNP="T->C"                                      |
|              | /codon_type=Nonsynonymous                        |

|              |                                                     |
|--------------|-----------------------------------------------------|
|              | /taxa=MG116025, MG116226, 4660, 4675, 4663,         |
|              | 4662, A487_1, A487_2, CIRS101, 4679, MBN17,         |
|              | 2010EL_1798, 2010EL_1786, 2010EL_1792, IDHO1726,    |
|              | 4519, 4538, 4661, A488_2, A488_1,                   |
|              | PRL64, MBRN14, 4122, 4488, 4600,                    |
|              | 4585, 4536, 4623, 4605, 4593,                       |
|              | 4552, 4551, 4642, 4656, 4646,                       |
|              | 4339, 4322, 4784, 6210, 6215,                       |
|              | 6214, 6212, 6196, 6191, 6195,                       |
|              | 6193, 6194, 6201, 6197, 6180,                       |
|              | A482, A483, A481, 7682, 7684,                       |
|              | 7687, 7685, 7686, V5, V109,                         |
|              | A130, A131, VC51, V212-1, MJ1485, MJ1236,           |
|              | A346_2, A346_1, B33, 1627, 1346, 1362,              |
|              | 4670, 4672, 4121, 4110, 4111,                       |
|              | 4113, A109, A383, A330, MO10, PRL5,                 |
|              | A316, A245, A241, A10, GP140, RC9,                  |
|              | GP143, GP152, A397, A22, GP60, N16961,              |
|              | A19, A5, A31, A27, A185,                            |
|              | A184, A32, A177, A29, A180,                         |
|              | A232, A231, A201, A186, A200,                       |
|              | A193, A390, GP145, GP160, GP106,                    |
|              | A152, A155, A154, A4, PRL18                         |
| SNP Position | 3375244                                             |
|              | /SNP="T->C"                                         |
|              | /codon_type=Intergenic                              |
|              | /taxa=B33, 1627, 1346, 1362                         |
| SNP Position | 3375644                                             |
|              | /SNP="A->C"                                         |
|              | /codon_type=Intergenic                              |
|              | /taxa=4663, 4662, A487_1, A487_2, CIRS101,          |
|              | 4679, MBN17, 2010EL_1798, 2010EL_1786, 2010EL_1792, |
|              | IDHO1726, 4519, 4538                                |
| SNP Position | 3377134                                             |
|              | /SNP="A->G"                                         |
|              | /codon_type=Nonsynonymous                           |
|              | /taxa=A397                                          |
| SNP Position | 3384140                                             |
|              | /SNP="C->T"                                         |
|              | /codon_type=Synonymous                              |
|              | /taxa=4675, 4663, 4662, A487_1, A487_2,             |
|              | CIRS101, 4679, MBN17, 2010EL_1798, 2010EL_1786,     |
|              | 2010EL_1792, IDHO1726, 4519, 4538, 4661,            |
|              | A488_2, A488_1                                      |
| SNP Position | 3385149                                             |
|              | /SNP="G->T"                                         |
|              | /codon_type=Intergenic                              |
|              | /taxa=4122                                          |
| SNP Position | 3391580                                             |
|              | /SNP="T->C"                                         |
|              | /codon_type=Synonymous                              |
|              | /taxa=A4                                            |
| SNP Position | 3400592                                             |

|              |                                                  |
|--------------|--------------------------------------------------|
|              | /SNP="T->C"                                      |
|              | /codon_type=Nonsynonymous                        |
|              | /taxa=MG116025, MG116226, 4660, 4675, 4663,      |
|              | 4662, A487_1, A487_2, CIRS101, 4679, MBN17,      |
|              | 2010EL_1798, 2010EL_1786, 2010EL_1792, IDHO1726, |
|              | 4519, 4538, 4661, A488_2, A488_1,                |
|              | PRL64, MBRN14, 4122, 4488, 4600,                 |
|              | 4585, 4536, 4623, 4605, 4593,                    |
|              | 4552, 4551, 4642, 4656, 4646,                    |
|              | 4339, 4322, 4784, 6210, 6215,                    |
|              | 6214, 6212, 6196, 6191, 6195,                    |
|              | 6193, 6194, 6201, 6197, 6180,                    |
|              | A482, A483, A481, 7682, 7684,                    |
|              | 7687, 7685, 7686, V5, V109,                      |
|              | A130, A131, VC51, V212-1, MJ1485, MJ1236,        |
|              | A346_2, A346_1, B33, 1627, 1346, 1362,           |
|              | 4670, 4672, 4121, 4110, 4111, 4113               |
| SNP Position | 3403447                                          |
|              | /SNP="G->A"                                      |
|              | /codon_type=Synonymous                           |
|              | /taxa=A383, A330, MO10                           |
| SNP Position | 3404066                                          |
|              | /SNP="C->T"                                      |
|              | /codon_type=Intergenic                           |
|              | /taxa=A152, A155, A154                           |
| SNP Position | 3406328                                          |
|              | /SNP="C->T"                                      |
|              | /codon_type=Intergenic                           |
|              | /taxa=A383                                       |
| SNP Position | 3411265                                          |
|              | /SNP="G->A"                                      |
|              | /codon_type=Nonsynonymous                        |
|              | /taxa=V212-1                                     |
| SNP Position | 3414683                                          |
|              | /SNP="G->A"                                      |
|              | /codon_type=Synonymous                           |
|              | /taxa=A4                                         |
| SNP Position | 3415430                                          |
|              | /SNP="C->T"                                      |
|              | /codon_type=Synonymous                           |
|              | /taxa=4121, 4110, 4111, 4113                     |
| SNP Position | 3420265                                          |
|              | /strand=reverse                                  |
|              | /SNP="T->C"                                      |
|              | /codon_type=Synonymous                           |
|              | /taxa=A4                                         |
| SNP Position | 3420418                                          |
|              | /strand=reverse                                  |
|              | /SNP="G->A"                                      |
|              | /codon_type=Synonymous                           |
|              | /taxa=4784, 6210, 6215, 6214, 6212,              |
|              | 6196, 6191, 6195, 6193, 6194,                    |
|              | 6201, 6197, 6180, A482, A483,                    |

|              |                                                  |
|--------------|--------------------------------------------------|
|              | A481, 7682, 7684, 7687, 7685,                    |
|              | 7686                                             |
| SNP Position | 3421571                                          |
|              | /strand=reverse                                  |
|              | /SNP="G->T"                                      |
|              | /codon_type=Nonsynonymous                        |
|              | /taxa=4784                                       |
| SNP Position | 3423352                                          |
|              | /SNP="C->T"                                      |
|              | /codon_type=SNOP (non-stop codon to stop condon) |
|              | /taxa=4672                                       |
| SNP Position | 3428051                                          |
|              | /strand=reverse                                  |
|              | /SNP="G->A"                                      |
|              | /codon_type=Nonsynonymous                        |
|              | /taxa=V109                                       |
| SNP Position | 3431089                                          |
|              | /SNP="C->T"                                      |
|              | /codon_type=Nonsynonymous                        |
|              | /taxa=4663, 4662, A487_1, A487_2                 |
| SNP Position | 3431972                                          |
|              | /SNP="T->C"                                      |
|              | /codon_type=Nonsynonymous                        |
|              | /taxa=RC9                                        |
| SNP Position | 3433964                                          |
|              | /strand=reverse                                  |
|              | /SNP="G->C"                                      |
|              | /codon_type=Nonsynonymous                        |
|              | /taxa=A5, A31, A27, A185, A184,                  |
|              | A32, A177, A29, A180, A232,                      |
|              | A231, A201, A186, A200, A193,                    |
|              | A390                                             |
| SNP Position | 3437366                                          |
|              | /SNP="C->A"                                      |
|              | /codon_type=Nonsynonymous                        |
|              | /taxa=4322                                       |
| SNP Position | 3443938                                          |
|              | /SNP="C->T"                                      |
|              | /codon_type=Nonsynonymous                        |
|              | /taxa=A4                                         |
| SNP Position | 3444786                                          |
|              | /SNP="T->A"                                      |
|              | /codon_type=Synonymous                           |
|              | /taxa=MBRN14                                     |
| SNP Position | 3446126                                          |
|              | /SNP="G->A"                                      |
|              | /codon_type=Nonsynonymous                        |
|              | /taxa=MG116025, MG116226, 4660, 4675, 4663,      |
|              | 4662, A487_1, A487_2, CIRS101, 4679, MBN17,      |
|              | 2010EL_1798, 2010EL_1786, 2010EL_1792, IDHO1726, |
|              | 4519, 4538, 4661, A488_2, A488_1,                |
|              | PRL64, MBRN14, 4122, 4488, 4600,                 |
|              | 4585, 4536, 4623, 4605, 4593,                    |

|              |                                                  |
|--------------|--------------------------------------------------|
|              | 4552, 4551, 4642, 4656, 4646,                    |
|              | 4339, 4322, 4784, 6210, 6215,                    |
|              | 6214, 6212, 6196, 6191, 6195,                    |
|              | 6193, 6194, 6201, 6197, 6180,                    |
|              | A482, A483, A481, 7682, 7684,                    |
|              | 7687, 7685, 7686, V5, V109,                      |
|              | A130, A131, VC51, V212-1, MJ1485, MJ1236,        |
|              | A346_2, A346_1, B33, 1627, 1346, 1362,           |
|              | 4670, 4672, 4121, 4110, 4111,                    |
|              | 4113, A109, A383, A330, MO10, PRL5,              |
|              | A316, A245, A241, A10, GP140, RC9,               |
|              | GP143, GP152, A397, A22, GP60, N16961,           |
|              | A19                                              |
| SNP Position | 3447252                                          |
|              | /strand=reverse                                  |
|              | /SNP="C->T"                                      |
|              | /codon_type=Nonsynonymous                        |
|              | /taxa=A152, A155, A154                           |
| SNP Position | 3448829                                          |
|              | /SNP="C->T"                                      |
|              | /codon_type=Nonsynonymous                        |
|              | /taxa=VC51, V212-1, MJ1485, MJ1236, A346_2,      |
|              | A346_1, B33, 1627, 1346, 1362, 4670,             |
|              | 4672, 4121, 4110, 4111, 4113                     |
| SNP Position | 3455480                                          |
|              | /SNP="A->G"                                      |
|              | /codon_type=Nonsynonymous                        |
|              | /taxa=A5, A31, A27, A185, A184,                  |
|              | A32, A177, A29, A180, A232,                      |
|              | A231, A201, A186, A200, A193,                    |
|              | A390                                             |
| SNP Position | 3455770                                          |
|              | /SNP="G->T"                                      |
|              | /codon_type=SNOP (non-stop codon to stop condon) |
|              | /taxa=PRL18                                      |
| SNP Position | 3469174                                          |
|              | /SNP="C->T"                                      |
|              | /codon_type=Intergenic                           |
|              | /taxa=VC51, V212-1, MJ1485, MJ1236, A346_2,      |
|              | A346_1, B33, 1627, 1346, 1362, 4670,             |
|              | 4672, 4121, 4110, 4111, 4113                     |
| SNP Position | 3469259                                          |
|              | /SNP="T->C"                                      |
|              | /codon_type=Intergenic                           |
|              | /taxa=A397                                       |
| SNP Position | 3479479                                          |
|              | /strand=reverse                                  |
|              | /SNP="A->G"                                      |
|              | /codon_type=Nonsynonymous                        |
|              | /taxa=A5, A31, A27, A185, A184,                  |
|              | A32, A177, A29, A180, A232,                      |
|              | A231, A201, A186, A200, A193,                    |
|              | A390                                             |

|              |                                                                                                       |
|--------------|-------------------------------------------------------------------------------------------------------|
| SNP Position | 3481314                                                                                               |
|              | /SNP="C->G"                                                                                           |
|              | /codon_type=Nonsynonymous                                                                             |
|              | /taxa=A397, A22                                                                                       |
| SNP Position | 3481451                                                                                               |
|              | /SNP="C->T"                                                                                           |
|              | /codon_type=Synonymous                                                                                |
|              | /taxa=4784                                                                                            |
| SNP Position | 3488087                                                                                               |
|              | /strand=reverse                                                                                       |
|              | /SNP="A->G"                                                                                           |
|              | /codon_type=Nonsynonymous                                                                             |
|              | /taxa=A4                                                                                              |
| SNP Position | 3493603                                                                                               |
|              | /SNP="T->C"                                                                                           |
|              | /codon_type=Synonymous                                                                                |
|              | /taxa=A383, A330, MO10                                                                                |
| SNP Position | 3496450                                                                                               |
|              | /SNP="G->A"                                                                                           |
|              | /codon_type=Intergenic                                                                                |
|              | /taxa=A22                                                                                             |
| SNP Position | 3506149                                                                                               |
|              | /SNP="C->G"                                                                                           |
|              | /codon_type=Intergenic                                                                                |
|              | /taxa=A232, A231, A201, A186, A200,<br>A193, A390                                                     |
| SNP Position | 3509641                                                                                               |
|              | /SNP="G->A"                                                                                           |
|              | /codon_type=Nonsynonymous                                                                             |
|              | /taxa=GP143                                                                                           |
| SNP Position | 3510685                                                                                               |
|              | /SNP="C->T"                                                                                           |
|              | /codon_type=Nonsynonymous                                                                             |
|              | /taxa=A383                                                                                            |
| SNP Position | 3510884                                                                                               |
|              | /SNP="T->C"                                                                                           |
|              | /codon_type=Synonymous                                                                                |
|              | /taxa=A4                                                                                              |
| SNP Position | 3512085                                                                                               |
|              | /SNP="T->A"                                                                                           |
|              | /codon_type=Nonsynonymous                                                                             |
|              | /taxa=A4                                                                                              |
| SNP Position | 3516237                                                                                               |
|              | /SNP="C->T"                                                                                           |
|              | /codon_type=Nonsynonymous                                                                             |
|              | /taxa=RC9                                                                                             |
| SNP Position | 3521495                                                                                               |
|              | /strand=reverse                                                                                       |
|              | /SNP="G->A"                                                                                           |
|              | /codon_type=Nonsynonymous                                                                             |
|              | /taxa=4784, 6210, 6215, 6214, 6212,<br>6196, 6191, 6195, 6193, 6194,<br>6201, 6197, 6180, A482, A483, |

|              |                                        |
|--------------|----------------------------------------|
|              | A481, 7682, 7684, 7687, 7685,          |
|              | 7686                                   |
| SNP Position | 3523258                                |
|              | /strand=reverse                        |
|              | /SNP="G->T"                            |
|              | /codon_type=Nonsynonymous              |
|              | /taxa=A397                             |
| SNP Position | 3523311                                |
|              | /strand=reverse                        |
|              | /SNP="C->T"                            |
|              | /codon_type=Synonymous                 |
|              | /taxa=V212-1                           |
| SNP Position | 3525800                                |
|              | /SNP="C->T"                            |
|              | /codon_type=Synonymous                 |
|              | /taxa=PRL64, MBRN14, 4122, 4488, 4600, |
|              | 4585, 4536, 4623, 4605, 4593,          |
|              | 4552, 4551, 4642, 4656, 4646,          |
|              | 4339, 4322                             |
| SNP Position | 3527832                                |
|              | /strand=reverse                        |
|              | /SNP="G->A"                            |
|              | /codon_type=Nonsynonymous              |
|              | /taxa=A5, A31, A27, A185, A184,        |
|              | A32, A177, A29, A180, A232,            |
|              | A231, A201, A186, A200, A193,          |
|              | A390                                   |
| SNP Position | 3528400                                |
|              | /strand=reverse                        |
|              | /SNP="C->T"                            |
|              | /codon_type=Nonsynonymous              |
|              | /taxa=A4                               |
| SNP Position | 3529415                                |
|              | /strand=reverse                        |
|              | /SNP="G->A"                            |
|              | /codon_type=Synonymous                 |
|              | /taxa=A152, A155, A154                 |
| SNP Position | 3529656                                |
|              | /strand=reverse                        |
|              | /SNP="C->T"                            |
|              | /codon_type=Nonsynonymous              |
|              | /taxa=IDHO1726                         |
| SNP Position | 3533157                                |
|              | /strand=reverse                        |
|              | /SNP="A->C"                            |
|              | /codon_type=Nonsynonymous              |
|              | /taxa=A397                             |
| SNP Position | 3533392                                |
|              | /strand=reverse                        |
|              | /SNP="T->C"                            |
|              | /codon_type=Nonsynonymous              |
|              | /taxa=A10                              |
| SNP Position | 3533464                                |

|              |                                                  |
|--------------|--------------------------------------------------|
|              | /strand=reverse                                  |
|              | /SNP="G->A"                                      |
|              | /codon_type=SNOP (non-stop codon to stop condon) |
|              | /taxa=A383, A330, MO10                           |
| SNP Position | 3533644                                          |
|              | /strand=reverse                                  |
|              | /SNP="G->A"                                      |
|              | /codon_type=SNOP (non-stop codon to stop condon) |
|              | /taxa=MG116025, MG116226, 4660, 4675, 4663,      |
|              | 4662, A487_1, A487_2, CIRS101, 4679, MBN17,      |
|              | 2010EL_1798, 2010EL_1786, 2010EL_1792, IDHO1726, |
|              | 4519, 4538, 4661, A488_2, A488_1,                |
|              | PRL64, MBRN14, 4122, 4488, 4600,                 |
|              | 4585, 4536, 4623, 4605, 4593,                    |
|              | 4552, 4551, 4642, 4656, 4646,                    |
|              | 4339, 4322, 4784, 6210, 6215,                    |
|              | 6214, 6212, 6196, 6191, 6195,                    |
|              | 6193, 6194, 6201, 6197, 6180,                    |
|              | A482, A483, A481, 7682, 7684,                    |
|              | 7687, 7685, 7686, V5, V109,                      |
|              | A130, A131, VC51, V212-1, MJ1485, MJ1236,        |
|              | A346_2, A346_1, B33, 1627, 1346, 1362,           |
|              | 4670, 4672, 4121, 4110, 4111, 4113               |
| SNP Position | 3538244                                          |
|              | /strand=reverse                                  |
|              | /SNP="C->A"                                      |
|              | /codon_type=Nonsynonymous                        |
|              | /taxa=2010EL_1798, 2010EL_1786, 2010EL_1792      |
| SNP Position | 3539394                                          |
|              | /SNP="C->T"                                      |
|              | /codon_type=Intergenic                           |
|              | /taxa=A482, A483, A481, 7682, 7684,              |
|              | 7687, 7685, 7686                                 |
| SNP Position | 3539484                                          |
|              | /SNP="G->A"                                      |
|              | /codon_type=Nonsynonymous                        |
|              | /taxa=GP152, A397, A22                           |
| SNP Position | 3545044                                          |
|              | /strand=reverse                                  |
|              | /SNP="G->A"                                      |
|              | /codon_type=Synonymous                           |
|              | /taxa=B33, 1627, 1346, 1362                      |
| SNP Position | 3548192                                          |
|              | /SNP="C->A"                                      |
|              | /codon_type=Intergenic                           |
|              | /taxa=A152, A155, A154                           |
| SNP Position | 3549798                                          |
|              | /SNP="A->G"                                      |
|              | /codon_type=Intergenic                           |
|              | /taxa=4660                                       |
| SNP Position | 3552630                                          |
|              | /SNP="A->G"                                      |
|              | /codon_type=Nonsynonymous                        |



|              |                                                         |
|--------------|---------------------------------------------------------|
|              | /taxa=A4                                                |
| SNP Position | 3554076                                                 |
|              | /SNP="A->G"                                             |
|              | /homoplasy=convergence with branch leading to A245      |
|              | /codon_type=Intergenic                                  |
|              | /taxa=4660                                              |
| SNP Position | 3554076                                                 |
|              | /SNP="A->G"                                             |
|              | /homoplasy=convergence with branch leading to 4660      |
|              | /codon_type=Intergenic                                  |
|              | /taxa=A245                                              |
| SNP Position | 3558333                                                 |
|              | /SNP="A->G"                                             |
|              | /codon_type=Intergenic                                  |
|              | /taxa=4600, 4585, 4536, 4623                            |
| SNP Position | 3561665                                                 |
|              | /SNP="G->C"                                             |
|              | /codon_type=Intergenic                                  |
|              | /taxa=A397, A22                                         |
| SNP Position | 3561898                                                 |
|              | /SNP="G->A"                                             |
|              | /codon_type=Synonymous                                  |
|              | /taxa=PRL64                                             |
| SNP Position | 3561996                                                 |
|              | /SNP="C->T"                                             |
|              | /codon_type=Nonsynonymous                               |
|              | /taxa=PRL18                                             |
| SNP Position | 3562020                                                 |
|              | /SNP="C->T"                                             |
|              | /codon_type=Nonsynonymous                               |
|              | /taxa=V212-1                                            |
| SNP Position | 3562181                                                 |
|              | /SNP="A->C"                                             |
|              | /codon_type=Nonsynonymous                               |
|              | /taxa=4536                                              |
| SNP Position | 3563242                                                 |
|              | /SNP="T->C"                                             |
|              | /codon_type=Synonymous                                  |
|              | /taxa=A4                                                |
| SNP Position | 3564789                                                 |
|              | /strand=reverse                                         |
|              | /SNP="C->T"                                             |
|              | /codon_type=Synonymous                                  |
|              | /taxa=A245, A241                                        |
| SNP Position | 3566294                                                 |
|              | /SNP="A->G"                                             |
|              | /codon_type=Intergenic                                  |
|              | /taxa=A482, A483, A481, 7682, 7684,<br>7687, 7685, 7686 |
| SNP Position | 3571072                                                 |
|              | /strand=reverse                                         |
|              | /SNP="G->A"                                             |
|              | /codon_type=Nonsynonymous                               |

|              |                                     |
|--------------|-------------------------------------|
|              | /taxa=IDHO1726                      |
| SNP Position | 3575754                             |
|              | /SNP="C->T"                         |
|              | /codon_type=Synonymous              |
|              | /taxa=6210, 6215, 6214, 6212, 6196, |
|              | 6191, 6195, 6193, 6194, 6201,       |
|              | 6197, 6180                          |
| SNP Position | 3576706                             |
|              | /SNP="C->T"                         |
|              | /codon_type=Synonymous              |
|              | /taxa=4784, 6210, 6215, 6214, 6212, |
|              | 6196, 6191, 6195, 6193, 6194,       |
|              | 6201, 6197, 6180, A482, A483,       |
|              | A481, 7682, 7684, 7687, 7685,       |
|              | 7686                                |
| SNP Position | 3577104                             |
|              | /SNP="T->C"                         |
|              | /codon_type=Nonsynonymous           |
|              | /taxa=A4                            |
| SNP Position | 3577937                             |
|              | /strand=reverse                     |
|              | /SNP="T->G"                         |
|              | /codon_type=Nonsynonymous           |
|              | /taxa=4111, 4113                    |
| SNP Position | 3578873                             |
|              | /SNP="T->C"                         |
|              | /codon_type=Intergenic              |
|              | /taxa=A245, A241                    |
| SNP Position | 3581904                             |
|              | /SNP="G->A"                         |
|              | /codon_type=Nonsynonymous           |
|              | /taxa=A31, A27, A185, A184, A32,    |
|              | A177, A29, A180, A232, A231,        |
|              | A201, A186, A200, A193, A390        |
| SNP Position | 3583899                             |
|              | /SNP="G->A"                         |
|              | /codon_type=Synonymous              |
|              | /taxa=4122                          |
| SNP Position | 3586850                             |
|              | /SNP="G->T"                         |
|              | /codon_type=Nonsynonymous           |
|              | /taxa=A482, A483, A481, 7682, 7684, |
|              | 7687, 7685, 7686                    |
| SNP Position | 3587117                             |
|              | /strand=reverse                     |
|              | /SNP="G->A"                         |
|              | /codon_type=Nonsynonymous           |
|              | /taxa=A4                            |
| SNP Position | 3587617                             |
|              | /strand=reverse                     |
|              | /SNP="C->T"                         |
|              | /codon_type=Synonymous              |
|              | /taxa=4121, 4110, 4111, 4113        |

|              |                                                  |
|--------------|--------------------------------------------------|
| SNP Position | 3590730                                          |
|              | /strand=reverse                                  |
|              | /SNP="G->A"                                      |
|              | /codon_type=Synonymous                           |
|              | /taxa=MJ1485                                     |
| SNP Position | 3591984                                          |
|              | /SNP="T->C"                                      |
|              | /codon_type=Intergenic                           |
|              | /taxa=A4                                         |
| SNP Position | 3592256                                          |
|              | /SNP="G->A"                                      |
|              | /codon_type=Intergenic                           |
|              | /taxa=A4                                         |
| SNP Position | 3592981                                          |
|              | /strand=reverse                                  |
|              | /SNP="G->A"                                      |
|              | /codon_type=Synonymous                           |
|              | /taxa=A4                                         |
| SNP Position | 3597595                                          |
|              | /SNP="G->A"                                      |
|              | /codon_type=Nonsynonymous                        |
|              | /taxa=A383, A330, MO10                           |
| SNP Position | 3600133                                          |
|              | /strand=reverse                                  |
|              | /SNP="G->A"                                      |
|              | /codon_type=Synonymous                           |
|              | /taxa=MG116025, MG116226, 4660, 4675, 4663,      |
|              | 4662, A487_1, A487_2, CIRS101, 4679, MBN17,      |
|              | 2010EL_1798, 2010EL_1786, 2010EL_1792, IDHO1726, |
|              | 4519, 4538, 4661, A488_2, A488_1,                |
|              | PRL64, MBRN14, 4122, 4488, 4600,                 |
|              | 4585, 4536, 4623, 4605, 4593,                    |
|              | 4552, 4551, 4642, 4656, 4646,                    |
|              | 4339, 4322, 4784, 6210, 6215,                    |
|              | 6214, 6212, 6196, 6191, 6195,                    |
|              | 6193, 6194, 6201, 6197, 6180,                    |
|              | A482, A483, A481, 7682, 7684,                    |
|              | 7687, 7685, 7686, V5, V109,                      |
|              | A130, A131, VC51, V212-1, MJ1485, MJ1236,        |
|              | A346_2, A346_1, B33, 1627, 1346, 1362,           |
|              | 4670, 4672, 4121, 4110, 4111,                    |
|              | 4113, A109, A383, A330, MO10                     |
| SNP Position | 3600152                                          |
|              | /strand=reverse                                  |
|              | /SNP="A->C"                                      |
|              | /codon_type=Nonsynonymous                        |
|              | /taxa=B33, 1627, 1346, 1362                      |
| SNP Position | 3600873                                          |
|              | /strand=reverse                                  |
|              | /SNP="T->C"                                      |
|              | /codon_type=Nonsynonymous                        |
|              | /taxa=4675, 4663, 4662, A487_1, A487_2,          |
|              | CIRS101, 4679, MBN17, 2010EL_1798, 2010EL_1786,  |

|              |                                                  |
|--------------|--------------------------------------------------|
|              | 2010EL_1792, IDHO1726, 4519, 4538, 4661,         |
|              | A488_2, A488_1, PRL64, MBRN14, 4122,             |
|              | 4488, 4600, 4585, 4536, 4623,                    |
|              | 4605, 4593, 4552, 4551, 4642,                    |
|              | 4656, 4646, 4339, 4322                           |
| SNP Position | 3606016                                          |
|              | /strand=reverse                                  |
|              | /SNP="G->A"                                      |
|              | /codon_type=Nonsynonymous                        |
|              | /taxa=4679                                       |
| SNP Position | 3612593                                          |
|              | /SNP="C->T"                                      |
|              | /codon_type=Synonymous                           |
|              | /taxa=RC9                                        |
| SNP Position | 3620109                                          |
|              | /SNP="C->A"                                      |
|              | /codon_type=Nonsynonymous                        |
|              | /taxa=4679                                       |
| SNP Position | 3622449                                          |
|              | /strand=reverse                                  |
|              | /SNP="G->A"                                      |
|              | /codon_type=Nonsynonymous                        |
|              | /taxa=A201                                       |
| SNP Position | 3634585                                          |
|              | /strand=reverse                                  |
|              | /SNP="T->C"                                      |
|              | /codon_type=Nonsynonymous                        |
|              | /taxa=A397                                       |
| SNP Position | 3638144                                          |
|              | /strand=reverse                                  |
|              | /SNP="C->T"                                      |
|              | /codon_type=Nonsynonymous                        |
|              | /taxa=GP140                                      |
| SNP Position | 3639560                                          |
|              | /SNP="C->T"                                      |
|              | /codon_type=Intergenic                           |
|              | /taxa=A482, A483, A481, 7682, 7684,              |
|              | 7687, 7685, 7686                                 |
| SNP Position | 3641970                                          |
|              | /strand=reverse                                  |
|              | /SNP="C->T"                                      |
|              | /codon_type=Nonsynonymous                        |
|              | /taxa=A4                                         |
| SNP Position | 3644378                                          |
|              | /strand=reverse                                  |
|              | /SNP="G->A"                                      |
|              | /codon_type=Nonsynonymous                        |
|              | /taxa=PRL18                                      |
| SNP Position | 3647024                                          |
|              | /strand=reverse                                  |
|              | /SNP="G->T"                                      |
|              | /codon_type=SNOP (non-stop codon to stop condon) |
|              | /taxa=4679, MBN17, 2010EL_1798, 2010EL_1786,     |

|              |                                                                             |
|--------------|-----------------------------------------------------------------------------|
|              | 2010EL_1792, IDHO1726, 4519, 4538                                           |
| SNP Position | 3650811                                                                     |
|              | /SNP="T->C"                                                                 |
|              | /codon_type=Intergenic                                                      |
|              | /taxa=GP152                                                                 |
| SNP Position | 3652034                                                                     |
|              | /SNP="A->T"                                                                 |
|              | /codon_type=Intergenic                                                      |
|              | /taxa=A10                                                                   |
| SNP Position | 3652035                                                                     |
|              | /SNP="G->T"                                                                 |
|              | /codon_type=Intergenic                                                      |
|              | /taxa=4111                                                                  |
| SNP Position | 3652038                                                                     |
|              | /SNP="C->G"                                                                 |
|              | /codon_type=Intergenic                                                      |
|              | /taxa=4111                                                                  |
| SNP Position | 3653029                                                                     |
|              | /SNP="T->C"                                                                 |
|              | /codon_type=Synonymous                                                      |
|              | /taxa=A4                                                                    |
| SNP Position | 3655649                                                                     |
|              | /SNP="C->T"                                                                 |
|              | /codon_type=Synonymous                                                      |
|              | /taxa=A130, A131                                                            |
| SNP Position | 3657508                                                                     |
|              | /strand=reverse                                                             |
|              | /SNP="C->T"                                                                 |
|              | /codon_type=Nonsynonymous                                                   |
|              | /taxa=GP145, GP160, GP106                                                   |
| SNP Position | 3660780                                                                     |
|              | /SNP="G->A"                                                                 |
|              | /codon_type=Intergenic                                                      |
|              | /taxa=A383                                                                  |
| SNP Position | 3666073                                                                     |
|              | /SNP="G->A"                                                                 |
|              | /codon_type=Intergenic                                                      |
|              | /taxa=MBN17, 2010EL_1798, 2010EL_1786, 2010EL_1792,<br>IDHO1726, 4519, 4538 |
| SNP Position | 3669444                                                                     |
|              | /SNP="A->C"                                                                 |
|              | /codon_type=Intergenic                                                      |
|              | /taxa=6196, 6191, 6195, 6193, 6194,<br>6201, 6197, 6180                     |
| SNP Position | 3673617                                                                     |
|              | /strand=reverse                                                             |
|              | /SNP="T->A"                                                                 |
|              | /codon_type=Nonsynonymous                                                   |
|              | /taxa=GP152                                                                 |
| SNP Position | 3677459                                                                     |
|              | /SNP="C->T"                                                                 |
|              | /codon_type=Nonsynonymous                                                   |
|              | /taxa=4642, 4656, 4646                                                      |

|              |                                  |
|--------------|----------------------------------|
| SNP Position | 3678162                          |
|              | /strand=reverse                  |
|              | /SNP="G->A"                      |
|              | /codon_type=Nonsynonymous        |
|              | /taxa=GP140                      |
| SNP Position | 3679465                          |
|              | /SNP="T->C"                      |
|              | /codon_type=Nonsynonymous        |
|              | /taxa=IDHO1726                   |
| SNP Position | 3681207                          |
|              | /SNP="G->A"                      |
|              | /codon_type=Synonymous           |
|              | /taxa=A390                       |
| SNP Position | 3681708                          |
|              | /SNP="G->A"                      |
|              | /codon_type=Synonymous           |
|              | /taxa=A130, A131                 |
| SNP Position | 3684727                          |
|              | /SNP="A->C"                      |
|              | /codon_type=Intergenic           |
|              | /taxa=A31, A27, A185, A184, A32, |
|              | A177, A29, A180, A232, A231,     |
|              | A201, A186, A200, A193, A390     |
| SNP Position | 3685686                          |
|              | /strand=reverse                  |
|              | /SNP="T->G"                      |
|              | /codon_type=Nonsynonymous        |
|              | /taxa=4339                       |
| SNP Position | 3687288                          |
|              | /strand=reverse                  |
|              | /SNP="G->A"                      |
|              | /codon_type=Nonsynonymous        |
|              | /taxa=A4                         |
| SNP Position | 3688432                          |
|              | /SNP="C->T"                      |
|              | /codon_type=Synonymous           |
|              | /taxa=4488                       |
| SNP Position | 3696787                          |
|              | /SNP="T->C"                      |
|              | /codon_type=Nonsynonymous        |
|              | /taxa=A4                         |
| SNP Position | 3711659                          |
|              | /SNP="C->T"                      |
|              | /codon_type=Synonymous           |
|              | /taxa=A397, A22                  |
| SNP Position | 3724939                          |
|              | /SNP="C->T"                      |
|              | /codon_type=Nonsynonymous        |
|              | /taxa=4121, 4110, 4111, 4113     |
| SNP Position | 3728246                          |
|              | /SNP="G->T"                      |
|              | /codon_type=Nonsynonymous        |
|              | /taxa=A4                         |

|              |                                                  |
|--------------|--------------------------------------------------|
| SNP Position | 3732948                                          |
|              | /SNP="T->C"                                      |
|              | /codon_type=Intergenic                           |
|              | /taxa=M66, A6                                    |
| SNP Position | 3733388                                          |
|              | /SNP="A->G"                                      |
|              | /codon_type=Intergenic                           |
|              | /taxa=A152, A155, A154                           |
| SNP Position | 3734677                                          |
|              | /strand=reverse                                  |
|              | /SNP="T->A"                                      |
|              | /codon_type=Nonsynonymous                        |
|              | /taxa=MBRN14, 4122, 4488, 4600, 4585,            |
|              | 4536, 4623, 4605, 4593, 4552,                    |
|              | 4551, 4642, 4656, 4646, 4339, 4322               |
| SNP Position | 3734835                                          |
|              | /SNP="T->C"                                      |
|              | /codon_type=Intergenic                           |
|              | /taxa=4672                                       |
| SNP Position | 3749727                                          |
|              | /SNP="T->G"                                      |
|              | /codon_type=Intergenic                           |
|              | /taxa=N16961, A19                                |
| SNP Position | 3753795                                          |
|              | /strand=reverse                                  |
|              | /SNP="A->G"                                      |
|              | /codon_type=Synonymous                           |
|              | /taxa=V109                                       |
| SNP Position | 3755916                                          |
|              | /strand=reverse                                  |
|              | /SNP="A->G"                                      |
|              | /codon_type=Synonymous                           |
|              | /taxa=A4                                         |
| SNP Position | 3757907                                          |
|              | /strand=reverse                                  |
|              | /SNP="C->T"                                      |
|              | /codon_type=Nonsynonymous                        |
|              | /taxa=VC51, V212-1, MJ1485, MJ1236, A346_2,      |
|              | A346_1, B33, 1627, 1346, 1362, 4670,             |
|              | 4672, 4121, 4110, 4111, 4113                     |
| SNP Position | 3765165                                          |
|              | /strand=reverse                                  |
|              | /SNP="C->T"                                      |
|              | /codon_type=Synonymous                           |
|              | /taxa=A482, A483, A481, 7682, 7684,              |
|              | 7687, 7685, 7686                                 |
| SNP Position | 3765343                                          |
|              | /strand=reverse                                  |
|              | /SNP="C->T"                                      |
|              | /codon_type=Nonsynonymous                        |
|              | /taxa=MG116025, MG116226, 4660, 4675, 4663,      |
|              | 4662, A487_1, A487_2, CIRS101, 4679, MBN17,      |
|              | 2010EL_1798, 2010EL_1786, 2010EL_1792, IDHO1726, |

|              |                                             |
|--------------|---------------------------------------------|
|              | 4519, 4538, 4661, A488_2, A488_1,           |
|              | PRL64, MBRN14, 4122, 4488, 4600,            |
|              | 4585, 4536, 4623, 4605, 4593,               |
|              | 4552, 4551, 4642, 4656, 4646,               |
|              | 4339, 4322, 4784, 6210, 6215,               |
|              | 6214, 6212, 6196, 6191, 6195,               |
|              | 6193, 6194, 6201, 6197, 6180,               |
|              | A482, A483, A481, 7682, 7684,               |
|              | 7687, 7685, 7686, V5, V109,                 |
|              | A130, A131, VC51, V212-1, MJ1485, MJ1236,   |
|              | A346_2, A346_1, B33, 1627, 1346, 1362,      |
|              | 4670, 4672, 4121, 4110, 4111,               |
|              | 4113, A109, A383, A330, MO10                |
| SNP Position | 3766219                                     |
|              | /strand=reverse                             |
|              | /SNP="G->A"                                 |
|              | /codon_type=Synonymous                      |
|              | /taxa=A245                                  |
| SNP Position | 3767657                                     |
|              | /strand=reverse                             |
|              | /SNP="G->A"                                 |
|              | /codon_type=Nonsynonymous                   |
|              | /taxa=PRL18                                 |
| SNP Position | 3769960                                     |
|              | /strand=reverse                             |
|              | /SNP="A->T"                                 |
|              | /codon_type=Nonsynonymous                   |
|              | /taxa=V212-1                                |
| SNP Position | 3770215                                     |
|              | /SNP="T->C"                                 |
|              | /codon_type=Intergenic                      |
|              | /taxa=A316                                  |
| SNP Position | 3779310                                     |
|              | /strand=reverse                             |
|              | /SNP="C->T"                                 |
|              | /codon_type=Nonsynonymous                   |
|              | /taxa=A4                                    |
| SNP Position | 3781844                                     |
|              | /SNP="C->T"                                 |
|              | /codon_type=Synonymous                      |
|              | /taxa=2010EL_1798, 2010EL_1786, 2010EL_1792 |
| SNP Position | 3782341                                     |
|              | /strand=reverse                             |
|              | /SNP="C->T"                                 |
|              | /codon_type=Nonsynonymous                   |
|              | /taxa=6210, 6215, 6214, 6212, 6196,         |
|              | 6191, 6195, 6193, 6194, 6201,               |
|              | 6197, 6180                                  |
| SNP Position | 3787396                                     |
|              | /SNP="G->A"                                 |
|              | /codon_type=Nonsynonymous                   |
|              | /taxa=A152, A155, A154                      |
| SNP Position | 3789684                                     |



|              |                                                  |
|--------------|--------------------------------------------------|
|              | /strand=reverse                                  |
|              | /SNP="C->T"                                      |
|              | /codon_type=Nonsynonymous                        |
|              | /taxa=4600, 4585                                 |
| SNP Position | 3800954                                          |
|              | /strand=reverse                                  |
|              | /SNP="A->G"                                      |
|              | /codon_type=Synonymous                           |
|              | /taxa=PRL64, MBRN14, 4122, 4488, 4600,           |
|              | 4585, 4536, 4623, 4605, 4593,                    |
|              | 4552, 4551, 4642, 4656, 4646,                    |
|              | 4339, 4322                                       |
| SNP Position | 3802713                                          |
|              | /SNP="G->A"                                      |
|              | /codon_type=Nonsynonymous                        |
|              | /taxa=A152, A155, A154                           |
| SNP Position | 3805839                                          |
|              | /strand=reverse                                  |
|              | /SNP="G->A"                                      |
|              | /codon_type=SNOP (non-stop codon to stop condon) |
|              | /taxa=A383                                       |
| SNP Position | 3810829                                          |
|              | /SNP="T->C"                                      |
|              | /codon_type=Nonsynonymous                        |
|              | /taxa=A482, A483, A481, 7682, 7684,              |
|              | 7687, 7685, 7686                                 |
| SNP Position | 3815171                                          |
|              | /SNP="T->A"                                      |
|              | /codon_type=Intergenic                           |
|              | /taxa=A397                                       |
| SNP Position | 3818412                                          |
|              | /strand=reverse                                  |
|              | /SNP="G->T"                                      |
|              | /codon_type=Nonsynonymous                        |
|              | /taxa=1346                                       |
| SNP Position | 3819258                                          |
|              | /strand=reverse                                  |
|              | /SNP="G->A"                                      |
|              | /codon_type=Nonsynonymous                        |
|              | /taxa=A4                                         |
| SNP Position | 3822140                                          |
|              | /strand=reverse                                  |
|              | /SNP="G->A"                                      |
|              | /codon_type=Nonsynonymous                        |
|              | /taxa=A383, A330, MO10                           |
| SNP Position | 3822833                                          |
|              | /strand=reverse                                  |
|              | /SNP="T->C"                                      |
|              | /codon_type=Nonsynonymous                        |
|              | /taxa=A4                                         |
| SNP Position | 3823559                                          |
|              | /strand=reverse                                  |
|              | /SNP="G->A"                                      |

|              |                                                  |
|--------------|--------------------------------------------------|
|              | /codon_type=Synonymous                           |
|              | /taxa=B33, 1627, 1346, 1362                      |
| SNP Position | 3826193                                          |
|              | /strand=reverse                                  |
|              | /SNP="G->A"                                      |
|              | /codon_type=Nonsynonymous                        |
|              | /taxa=RC9                                        |
| SNP Position | 3828252                                          |
|              | /SNP="C->T"                                      |
|              | /codon_type=Nonsynonymous                        |
|              | /taxa=A330                                       |
| SNP Position | 3828256                                          |
|              | /SNP="C->T"                                      |
|              | /codon_type=Nonsynonymous                        |
|              | /taxa=VC51                                       |
| SNP Position | 3831412                                          |
|              | /SNP="A->G"                                      |
|              | /codon_type=Intergenic                           |
|              | /taxa=B33, 1627, 1346, 1362                      |
| SNP Position | 3833179                                          |
|              | /SNP="A->G"                                      |
|              | /codon_type=Nonsynonymous                        |
|              | /taxa=A4                                         |
| SNP Position | 3834415                                          |
|              | /strand=reverse                                  |
|              | /SNP="A->G"                                      |
|              | /codon_type=Nonsynonymous                        |
|              | /taxa=RC9                                        |
| SNP Position | 3834966                                          |
|              | /SNP="G->A"                                      |
|              | /codon_type=Nonsynonymous                        |
|              | /taxa=CIRS101                                    |
| SNP Position | 3837840                                          |
|              | /strand=reverse                                  |
|              | /SNP="G->A"                                      |
|              | /codon_type=Nonsynonymous                        |
|              | /taxa=A4                                         |
| SNP Position | 3839643                                          |
|              | /SNP="C->T"                                      |
|              | /codon_type=Intergenic                           |
|              | /taxa=MG116025, MG116226, 4660, 4675, 4663,      |
|              | 4662, A487_1, A487_2, CIRS101, 4679, MBN17,      |
|              | 2010EL_1798, 2010EL_1786, 2010EL_1792, IDHO1726, |
|              | 4519, 4538, 4661, A488_2, A488_1,                |
|              | PRL64, MBRN14, 4122, 4488, 4600,                 |
|              | 4585, 4536, 4623, 4605, 4593,                    |
|              | 4552, 4551, 4642, 4656, 4646,                    |
|              | 4339, 4322, 4784, 6210, 6215,                    |
|              | 6214, 6212, 6196, 6191, 6195,                    |
|              | 6193, 6194, 6201, 6197, 6180,                    |
|              | A482, A483, A481, 7682, 7684,                    |
|              | 7687, 7685, 7686, V5, V109,                      |
|              | A130, A131, VC51, V212-1, MJ1485, MJ1236,        |

|              |                                        |
|--------------|----------------------------------------|
|              | A346_2, A346_1, B33, 1627, 1346, 1362, |
|              | 4670, 4672, 4121, 4110, 4111,          |
|              | 4113, A109, A383, A330, MO10, PRL5     |
| SNP Position | 3845699                                |
|              | /strand=reverse                        |
|              | /SNP="C->T"                            |
|              | /codon_type=Nonsynonymous              |
|              | /taxa=A5, A31, A27, A185, A184,        |
|              | A32, A177, A29, A180, A232,            |
|              | A231, A201, A186, A200, A193,          |
|              | A390                                   |
| SNP Position | 3847191                                |
|              | /SNP="C->T"                            |
|              | /codon_type=Intergenic                 |
|              | /taxa=RC9, GP143, GP152, A397, A22,    |
|              | GP60                                   |
| SNP Position | 3849186                                |
|              | /SNP="T->C"                            |
|              | /codon_type=Nonsynonymous              |
|              | /taxa=A4                               |
| SNP Position | 3849480                                |
|              | /SNP="G->A"                            |
|              | /codon_type=Nonsynonymous              |
|              | /taxa=A4                               |
| SNP Position | 3851113                                |
|              | /SNP="C->G"                            |
|              | /codon_type=Intergenic                 |
|              | /taxa=A5, A31, A27, A185, A184,        |
|              | A32, A177, A29, A180, A232,            |
|              | A231, A201, A186, A200, A193,          |
|              | A390                                   |
| SNP Position | 3852218                                |
|              | /SNP="G->A"                            |
|              | /codon_type=Nonsynonymous              |
|              | /taxa=4672                             |
| SNP Position | 3852674                                |
|              | /SNP="C->A"                            |
|              | /codon_type=Nonsynonymous              |
|              | /taxa=4623                             |
| SNP Position | 3852708                                |
|              | /SNP="G->A"                            |
|              | /codon_type=Nonsynonymous              |
|              | /taxa=4339                             |
| SNP Position | 3855996                                |
|              | /strand=reverse                        |
|              | /SNP="G->A"                            |
|              | /codon_type=Nonsynonymous              |
|              | /taxa=A4                               |
| SNP Position | 3862193                                |
|              | /SNP="C->T"                            |
|              | /codon_type=Synonymous                 |
|              | /taxa=GP152, A397, A22                 |
| SNP Position | 3866818                                |

|              |                                                  |
|--------------|--------------------------------------------------|
|              | /SNP="A->G"                                      |
|              | /codon_type=Synonymous                           |
|              | /taxa=B33, 1627, 1346, 1362                      |
| SNP Position | 3869652                                          |
|              | /SNP="G->T"                                      |
|              | /codon_type=Intergenic                           |
|              | /taxa=A482                                       |
| SNP Position | 3875878                                          |
|              | /SNP="T->A"                                      |
|              | /codon_type=Nonsynonymous                        |
|              | /taxa=4672                                       |
| SNP Position | 3882231                                          |
|              | /strand=reverse                                  |
|              | /SNP="A->C"                                      |
|              | /codon_type=Nonsynonymous                        |
|              | /taxa=PRL64, MBRN14, 4122, 4488, 4600,           |
|              | 4585, 4536, 4623, 4605, 4593,                    |
|              | 4552, 4551, 4642, 4656, 4646,                    |
|              | 4339, 4322                                       |
| SNP Position | 3883657                                          |
|              | /strand=reverse                                  |
|              | /SNP="A->C"                                      |
|              | /codon_type=Nonsynonymous                        |
|              | /taxa=A316                                       |
| SNP Position | 3889560                                          |
|              | /strand=reverse                                  |
|              | /SNP="A->G"                                      |
|              | /codon_type=Synonymous                           |
|              | /taxa=MG116025, MG116226, 4660, 4675, 4663,      |
|              | 4662, A487_1, A487_2, CIRS101, 4679, MBN17,      |
|              | 2010EL_1798, 2010EL_1786, 2010EL_1792, IDHO1726, |
|              | 4519, 4538, 4661, A488_2, A488_1,                |
|              | PRL64, MBRN14, 4122, 4488, 4600,                 |
|              | 4585, 4536, 4623, 4605, 4593,                    |
|              | 4552, 4551, 4642, 4656, 4646,                    |
|              | 4339, 4322, 4784, 6210, 6215,                    |
|              | 6214, 6212, 6196, 6191, 6195,                    |
|              | 6193, 6194, 6201, 6197, 6180,                    |
|              | A482, A483, A481, 7682, 7684,                    |
|              | 7687, 7685, 7686, V5, V109,                      |
|              | A130, A131, VC51, V212-1, MJ1485, MJ1236,        |
|              | A346_2, A346_1, B33, 1627, 1346, 1362,           |
|              | 4670, 4672, 4121, 4110, 4111,                    |
|              | 4113, A109, A383, A330, MO10, PRL5,              |
|              | A316, A245, A241, A10, GP140, RC9,               |
|              | GP143, GP152, A397, A22, GP60, N16961,           |
|              | A19, A5, A31, A27, A185,                         |
|              | A184, A32, A177, A29, A180,                      |
|              | A232, A231, A201, A186, A200,                    |
|              | A193, A390, GP145, GP160, GP106,                 |
|              | A152, A155, A154, A4, PRL18                      |
| SNP Position | 3891674                                          |
|              | /strand=reverse                                  |

|              |                                                         |
|--------------|---------------------------------------------------------|
|              | /SNP="C->T"                                             |
|              | /codon_type=Nonsynonymous                               |
|              | /taxa=A4                                                |
| SNP Position | 3897834                                                 |
|              | /SNP="A->C"                                             |
|              | /codon_type=Nonsynonymous                               |
|              | /taxa=4121, 4110                                        |
| SNP Position | 3916079                                                 |
|              | /strand=reverse                                         |
|              | /SNP="C->T"                                             |
|              | /codon_type=Nonsynonymous                               |
|              | /taxa=PRL18                                             |
| SNP Position | 3919670                                                 |
|              | /SNP="T->A"                                             |
|              | /codon_type=Intergenic                                  |
|              | /taxa=A482, A483, A481, 7682, 7684,<br>7687, 7685, 7686 |
| SNP Position | 3926633                                                 |
|              | /strand=reverse                                         |
|              | /SNP="C->T"                                             |
|              | /codon_type=Synonymous                                  |
|              | /taxa=A245                                              |
| SNP Position | 3928123                                                 |
|              | /strand=reverse                                         |
|              | /SNP="C->G"                                             |
|              | /codon_type=Nonsynonymous                               |
|              | /taxa=6210, 6215, 6214, 6212                            |
| SNP Position | 3930720                                                 |
|              | /SNP="C->T"                                             |
|              | /codon_type=Synonymous                                  |
|              | /taxa=MJ1485, MJ1236                                    |
| SNP Position | 3930769                                                 |
|              | /SNP="G->A"                                             |
|              | /codon_type=Nonsynonymous                               |
|              | /taxa=4661, A488_2, A488_1                              |
| SNP Position | 3945042                                                 |
|              | /strand=reverse                                         |
|              | /SNP="C->A"                                             |
|              | /codon_type=Synonymous                                  |
|              | /taxa=4672, 4121, 4110, 4111, 4113                      |
| SNP Position | 3947069                                                 |
|              | /strand=reverse                                         |
|              | /SNP="A->G"                                             |
|              | /codon_type=Synonymous                                  |
|              | /taxa=MBRN14                                            |
| SNP Position | 3949870                                                 |
|              | /SNP="T->C"                                             |
|              | /codon_type=Nonsynonymous                               |
|              | /taxa=A482, A483, A481, 7682, 7684,<br>7687, 7685, 7686 |
| SNP Position | 3950356                                                 |
|              | /SNP="C->T"                                             |
|              | /codon_type=Nonsynonymous                               |

|              |                                             |
|--------------|---------------------------------------------|
|              | /taxa=4122, 4488, 4600, 4585, 4536,         |
|              | 4623, 4605, 4593, 4552, 4551                |
| SNP Position | 3950494                                     |
|              | /SNP="G->A"                                 |
|              | /codon_type=Nonsynonymous                   |
|              | /taxa=A4                                    |
| SNP Position | 3951187                                     |
|              | /SNP="T->C"                                 |
|              | /codon_type=Nonsynonymous                   |
|              | /taxa=4600, 4585, 4536, 4623                |
| SNP Position | 3951663                                     |
|              | /SNP="G->A"                                 |
|              | /codon_type=Nonsynonymous                   |
|              | /taxa=PRL18                                 |
| SNP Position | 3966727                                     |
|              | /strand=reverse                             |
|              | /SNP="G->A"                                 |
|              | /codon_type=Nonsynonymous                   |
|              | /taxa=4605, 4593, 4552, 4551                |
| SNP Position | 3968045                                     |
|              | /strand=reverse                             |
|              | /SNP="C->T"                                 |
|              | /codon_type=Nonsynonymous                   |
|              | /taxa=B33, 1627, 1346, 1362                 |
| SNP Position | 3970297                                     |
|              | /SNP="C->T"                                 |
|              | /codon_type=Synonymous                      |
|              | /taxa=A152, A155, A154                      |
| SNP Position | 3971997                                     |
|              | /strand=reverse                             |
|              | /SNP="T->C"                                 |
|              | /codon_type=Synonymous                      |
|              | /taxa=VC51                                  |
| SNP Position | 3978863                                     |
|              | /strand=reverse                             |
|              | /SNP="C->T"                                 |
|              | /codon_type=Nonsynonymous                   |
|              | /taxa=4605, 4593                            |
| SNP Position | 3980112                                     |
|              | /strand=reverse                             |
|              | /SNP="C->T"                                 |
|              | /codon_type=Nonsynonymous                   |
|              | /taxa=VC51, V212-1, MJ1485, MJ1236, A346_2, |
|              | A346_1, B33, 1627, 1346, 1362, 4670,        |
|              | 4672, 4121, 4110, 4111, 4113                |
| SNP Position | 3982703                                     |
|              | /strand=reverse                             |
|              | /SNP="A->G"                                 |
|              | /codon_type=Synonymous                      |
|              | /taxa=4656, 4646                            |
| SNP Position | 3983203                                     |
|              | /strand=reverse                             |
|              | /SNP="T->C"                                 |

|              |                                                  |
|--------------|--------------------------------------------------|
|              | /codon_type=Nonsynonymous                        |
|              | /taxa=A4                                         |
| SNP Position | 3984048                                          |
|              | /strand=reverse                                  |
|              | /SNP="T->C"                                      |
|              | /codon_type=Synonymous                           |
|              | /taxa=A4                                         |
| SNP Position | 3985238                                          |
|              | /SNP="C->T"                                      |
|              | /codon_type=Intergenic                           |
|              | /taxa=MG116025, MG116226, 4660, 4675, 4663,      |
|              | 4662, A487_1, A487_2, CIRS101, 4679, MBN17,      |
|              | 2010EL_1798, 2010EL_1786, 2010EL_1792, IDHO1726, |
|              | 4519, 4538, 4661, A488_2, A488_1,                |
|              | PRL64, MBRN14, 4122, 4488, 4600,                 |
|              | 4585, 4536, 4623, 4605, 4593,                    |
|              | 4552, 4551, 4642, 4656, 4646,                    |
|              | 4339, 4322, 4784, 6210, 6215,                    |
|              | 6214, 6212, 6196, 6191, 6195,                    |
|              | 6193, 6194, 6201, 6197, 6180,                    |
|              | A482, A483, A481, 7682, 7684,                    |
|              | 7687, 7685, 7686, V5, V109,                      |
|              | A130, A131, VC51, V212-1, MJ1485, MJ1236,        |
|              | A346_2, A346_1, B33, 1627, 1346, 1362,           |
|              | 4670, 4672, 4121, 4110, 4111,                    |
|              | 4113, A109, A383, A330, MO10, PRL5,              |
|              | A316, A245, A241, A10, GP140, RC9,               |
|              | GP143, GP152, A397, A22, GP60, N16961,           |
|              | A19, A5, A31, A27, A185,                         |
|              | A184, A32, A177, A29, A180,                      |
|              | A232, A231, A201, A186, A200,                    |
|              | A193, A390, GP145, GP160, GP106,                 |
|              | A152, A155, A154, A4, PRL18                      |
| SNP Position | 3986065                                          |
|              | /SNP="G->A"                                      |
|              | /codon_type=Intergenic                           |
|              | /taxa=PRL64, MBRN14, 4122, 4488, 4600,           |
|              | 4585, 4536, 4623, 4605, 4593,                    |
|              | 4552, 4551, 4642, 4656, 4646,                    |
|              | 4339, 4322                                       |
| SNP Position | 3987948                                          |
|              | /SNP="T->C"                                      |
|              | /codon_type=Intergenic                           |
|              | /taxa=A18                                        |
| SNP Position | 3988492                                          |
|              | /strand=reverse                                  |
|              | /SNP="T->C"                                      |
|              | /codon_type=Nonsynonymous                        |
|              | /taxa=6210, 6215, 6214, 6212, 6196,              |
|              | 6191, 6195, 6193, 6194, 6201,                    |
|              | 6197, 6180                                       |
| SNP Position | 3988732                                          |
|              | /strand=reverse                                  |

|              |                                                  |
|--------------|--------------------------------------------------|
|              | /SNP="A->G"                                      |
|              | /codon_type=Nonsynonymous                        |
|              | /taxa=A4                                         |
| SNP Position | 3989283                                          |
|              | /SNP="A->G"                                      |
|              | /codon_type=Intergenic                           |
|              | /taxa=A130, A131                                 |
| SNP Position | 3991767                                          |
|              | /SNP="C->A"                                      |
|              | /codon_type=Nonsynonymous                        |
|              | /taxa=VC51, V212-1, MJ1485, MJ1236, A346_2,      |
|              | A346_1, B33, 1627, 1346, 1362, 4670,             |
|              | 4672, 4121, 4110, 4111, 4113                     |
| SNP Position | 3992024                                          |
|              | /SNP="C->A"                                      |
|              | /codon_type=Nonsynonymous                        |
|              | /taxa=6210, 6215, 6214, 6212, 6196,              |
|              | 6191, 6195, 6193, 6194, 6201,                    |
|              | 6197, 6180                                       |
| SNP Position | 3992757                                          |
|              | /SNP="G->A"                                      |
|              | /codon_type=Synonymous                           |
|              | /taxa=A383                                       |
| SNP Position | 3992852                                          |
|              | /SNP="G->C"                                      |
|              | /codon_type=Nonsynonymous                        |
|              | /taxa=V5                                         |
| SNP Position | 3995581                                          |
|              | /SNP="C->T"                                      |
|              | /codon_type=Nonsynonymous                        |
|              | /taxa=MG116025, MG116226, 4660, 4675, 4663,      |
|              | 4662, A487_1, A487_2, CIRS101, 4679, MBN17,      |
|              | 2010EL_1798, 2010EL_1786, 2010EL_1792, IDHO1726, |
|              | 4519, 4538, 4661, A488_2, A488_1,                |
|              | PRL64, MBRN14, 4122, 4488, 4600,                 |
|              | 4585, 4536, 4623, 4605, 4593,                    |
|              | 4552, 4551, 4642, 4656, 4646,                    |
|              | 4339, 4322, 4784, 6210, 6215,                    |
|              | 6214, 6212, 6196, 6191, 6195,                    |
|              | 6193, 6194, 6201, 6197, 6180,                    |
|              | A482, A483, A481, 7682, 7684,                    |
|              | 7687, 7685, 7686, V5, V109,                      |
|              | A130, A131, VC51, V212-1, MJ1485, MJ1236,        |
|              | A346_2, A346_1, B33, 1627, 1346, 1362,           |
|              | 4670, 4672, 4121, 4110, 4111,                    |
|              | 4113, A109, A383, A330, MO10, PRL5,              |
|              | A316, A245, A241, A10, GP140, RC9,               |
|              | GP143, GP152, A397, A22, GP60, N16961,           |
|              | A19, A5, A31, A27, A185,                         |
|              | A184, A32, A177, A29, A180,                      |
|              | A232, A231, A201, A186, A200,                    |
|              | A193, A390, GP145, GP160, GP106,                 |
|              | A152, A155, A154, A4, PRL18                      |



|              |                                             |
|--------------|---------------------------------------------|
| SNP Position | 3997150                                     |
|              | /SNP="C->T"                                 |
|              | /codon_type=Nonsynonymous                   |
|              | /taxa=V5                                    |
| SNP Position | 3997842                                     |
|              | /SNP="C->T"                                 |
|              | /codon_type=Synonymous                      |
|              | /taxa=A482, A483, A481, 7682, 7684,         |
|              | 7687, 7685, 7686                            |
| SNP Position | 3998819                                     |
|              | /SNP="G->A"                                 |
|              | /codon_type=Nonsynonymous                   |
|              | /taxa=A5, A31, A27, A185, A184,             |
|              | A32, A177, A29, A180, A232,                 |
|              | A231, A201, A186, A200, A193,               |
|              | A390                                        |
| SNP Position | 3999960                                     |
|              | /SNP="C->A"                                 |
|              | /codon_type=Nonsynonymous                   |
|              | /taxa=PRL18                                 |
| SNP Position | 4000053                                     |
|              | /SNP="G->A"                                 |
|              | /codon_type=Nonsynonymous                   |
|              | /taxa=PRL18                                 |
| SNP Position | 4000523                                     |
|              | /SNP="C->T"                                 |
|              | /codon_type=Synonymous                      |
|              | /taxa=GP152                                 |
| SNP Position | 4001442                                     |
|              | /strand=reverse                             |
|              | /SNP="T->C"                                 |
|              | /codon_type=Nonsynonymous                   |
|              | /taxa=VC51, V212-1, MJ1485, MJ1236, A346_2, |
|              | A346_1, B33, 1627, 1346, 1362, 4670,        |
|              | 4672, 4121, 4110, 4111, 4113                |
| SNP Position | 4002659                                     |
|              | /strand=reverse                             |
|              | /SNP="T->C"                                 |
|              | /codon_type=Pseudogene                      |
|              | /taxa=A482, A483, A481, 7682, 7684,         |
|              | 7687, 7685, 7686                            |
| SNP Position | 4003349                                     |
|              | /strand=reverse                             |
|              | /SNP="C->A"                                 |
|              | /codon_type=Nonsynonymous                   |
|              | /taxa=1627                                  |
| SNP Position | 4004471                                     |
|              | /strand=reverse                             |
|              | /SNP="G->A"                                 |
|              | /codon_type=Nonsynonymous                   |
|              | /taxa=PRL5                                  |
| SNP Position | 4008958                                     |
|              | /strand=reverse                             |

|              |                                                  |
|--------------|--------------------------------------------------|
|              | /SNP="G->A"                                      |
|              | /codon_type=Nonsynonymous                        |
|              | /taxa=MG116025, MG116226, 4660, 4675, 4663,      |
|              | 4662, A487_1, A487_2, CIRS101, 4679, MBN17,      |
|              | 2010EL_1798, 2010EL_1786, 2010EL_1792, IDHO1726, |
|              | 4519, 4538, 4661, A488_2, A488_1,                |
|              | PRL64, MBRN14, 4122, 4488, 4600,                 |
|              | 4585, 4536, 4623, 4605, 4593,                    |
|              | 4552, 4551, 4642, 4656, 4646,                    |
|              | 4339, 4322, 4784, 6210, 6215,                    |
|              | 6214, 6212, 6196, 6191, 6195,                    |
|              | 6193, 6194, 6201, 6197, 6180,                    |
|              | A482, A483, A481, 7682, 7684,                    |
|              | 7687, 7685, 7686, V5, V109,                      |
|              | A130, A131, VC51, V212-1, MJ1485, MJ1236,        |
|              | A346_2, A346_1, B33, 1627, 1346, 1362,           |
|              | 4670, 4672, 4121, 4110, 4111,                    |
|              | 4113, A109, A383, A330, MO10, PRL5,              |
|              | A316, A245, A241, A10, GP140                     |
| SNP Position | 4012838                                          |
|              | /strand=reverse                                  |
|              | /SNP="C->T"                                      |
|              | /codon_type=Synonymous                           |
|              | /taxa=A5, A31, A27, A185, A184,                  |
|              | A32, A177, A29, A180, A232,                      |
|              | A231, A201, A186, A200, A193,                    |
|              | A390                                             |
| SNP Position | 4013231                                          |
|              | /strand=reverse                                  |
|              | /SNP="T->C"                                      |
|              | /codon_type=Synonymous                           |
|              | /taxa=A383                                       |
| SNP Position | 4013407                                          |
|              | /strand=reverse                                  |
|              | /SNP="G->A"                                      |
|              | /codon_type=Nonsynonymous                        |
|              | /taxa=A316                                       |
| SNP Position | 4013754                                          |
|              | /strand=reverse                                  |
|              | /SNP="C->T"                                      |
|              | /codon_type=Nonsynonymous                        |
|              | /taxa=A383                                       |
| SNP Position | 4016030                                          |
|              | /SNP="G->A"                                      |
|              | /codon_type=Nonsynonymous                        |
|              | /taxa=RC9                                        |
| SNP Position | 4017366                                          |
|              | /SNP="T->C"                                      |
|              | /codon_type=Synonymous                           |
|              | /taxa=A4                                         |
| SNP Position | 4023401                                          |
|              | /strand=reverse                                  |
|              | /SNP="C->T"                                      |

|              |                                                 |
|--------------|-------------------------------------------------|
|              | /codon_type=Synonymous                          |
|              | /taxa=4121, 4110, 4111, 4113                    |
| SNP Position | 4024406                                         |
|              | /strand=reverse                                 |
|              | /SNP="G->A"                                     |
|              | /codon_type=Synonymous                          |
|              | /taxa=A482, A483, A481                          |
| SNP Position | 4024520                                         |
|              | /strand=reverse                                 |
|              | /SNP="A->G"                                     |
|              | /codon_type=Synonymous                          |
|              | /taxa=A316                                      |
| SNP Position | 4025125                                         |
|              | /strand=reverse                                 |
|              | /SNP="G->T"                                     |
|              | /codon_type=Nonsynonymous                       |
|              | /taxa=4660, 4675, 4663, 4662, A487_1,           |
|              | A487_2, CIRS101, 4679, MBN17, 2010EL_1798,      |
|              | 2010EL_1786, 2010EL_1792, IDHO1726, 4519, 4538, |
|              | 4661, A488_2, A488_1, PRL64, MBRN14,            |
|              | 4122, 4488, 4600, 4585, 4536,                   |
|              | 4623, 4605, 4593, 4552, 4551,                   |
|              | 4642, 4656, 4646, 4339, 4322,                   |
|              | 4784, 6210, 6215, 6214, 6212,                   |
|              | 6196, 6191, 6195, 6193, 6194,                   |
|              | 6201, 6197, 6180, A482, A483,                   |
|              | A481, 7682, 7684, 7687, 7685,                   |
|              | 7686                                            |
| SNP Position | 4026253                                         |
|              | /strand=reverse                                 |
|              | /SNP="C->G"                                     |
|              | /codon_type=Nonsynonymous                       |
|              | /taxa=GP60                                      |
| SNP Position | 4027304                                         |
|              | /strand=reverse                                 |
|              | /SNP="A->C"                                     |
|              | /codon_type=Nonsynonymous                       |
|              | /taxa=4552                                      |
| SNP Position | 4028585                                         |
|              | /strand=reverse                                 |
|              | /SNP="T->C"                                     |
|              | /codon_type=Synonymous                          |
|              | /taxa=A383, A330, MO10                          |
